# Supplementary material for: Regionally distinct trophoblast regulate barrier function and invasion in the human placenta
Source: eLife. 2022 Jul 7;11:e78829. doi: 10.7554/eLife.78829 (PMC9323019; doi:10.7554/eLife.78829)
Supplement: Figure 1—source data 1. [file elife-78829-fig1-data1.csv]

	p_val	avg_logFC	pct.1	pct.2	p_val_adj	cluster	gene
S100A8	0	1.523666968	0.593	0.227	0	Macrophage 1 (M)	S100A8
S100A9	0	1.260261741	0.746	0.463	0	Macrophage 1 (M)	S100A9
LYZ	0	1.242709675	0.958	0.513	0	Macrophage 1 (M)	LYZ
IL1B	0	1.183407327	0.712	0.371	0	Macrophage 1 (M)	IL1B
FCN1	0	1.115000417	0.396	0.063	0	Macrophage 1 (M)	FCN1
SERPINA1	0	1.092163637	0.789	0.336	0	Macrophage 1 (M)	SERPINA1
OLR1	0	1.088594967	0.881	0.34	0	Macrophage 1 (M)	OLR1
NCF1	0	1.083285738	0.61	0.294	0	Macrophage 1 (M)	NCF1
CXCL9	0	0.985758471	0.486	0.174	0	Macrophage 1 (M)	CXCL9
APOBEC3A	0	0.983670741	0.39	0.077	0	Macrophage 1 (M)	APOBEC3A
C15orf48	0	0.93683447	0.714	0.335	0	Macrophage 1 (M)	C15orf48
APOC1	0	0.872041867	0.841	0.498	0	Macrophage 1 (M)	APOC1
ALDH2	0	0.859709561	0.733	0.294	0	Macrophage 1 (M)	ALDH2
HLA-DQA1	0	0.845116967	0.912	0.578	0	Macrophage 1 (M)	HLA-DQA1
MT2A	0	0.842670579	0.638	0.364	0	Macrophage 1 (M)	MT2A
FTH1	0	0.823595807	1	0.96	0	Macrophage 1 (M)	FTH1
APOE	0	0.802745994	0.849	0.602	0	Macrophage 1 (M)	APOE
AC020656.1	0	0.774889605	0.452	0.156	0	Macrophage 1 (M)	AC020656.1
HLA-DRA	0	0.771432336	0.995	0.684	0	Macrophage 1 (M)	HLA-DRA
BCL2A1	0	0.76957903	0.808	0.437	0	Macrophage 1 (M)	BCL2A1
HLA-DPA1	0	0.769028777	0.968	0.62	0	Macrophage 1 (M)	HLA-DPA1
HLA-DPB1	0	0.754283647	0.961	0.625	0	Macrophage 1 (M)	HLA-DPB1
CTSS	0	0.750588373	0.986	0.702	0	Macrophage 1 (M)	CTSS
LTA4H	0	0.747614695	0.653	0.27	0	Macrophage 1 (M)	LTA4H
HLA-DRB1	0	0.731871339	0.977	0.656	0	Macrophage 1 (M)	HLA-DRB1
FBP1	0	0.726807719	0.563	0.238	0	Macrophage 1 (M)	FBP1
LST1	0	0.72386774	0.776	0.399	0	Macrophage 1 (M)	LST1
VAMP5	0	0.715347046	0.626	0.31	0	Macrophage 1 (M)	VAMP5
WARS	0	0.698627735	0.525	0.231	0	Macrophage 1 (M)	WARS
S100A6	0	0.697861066	0.91	0.681	0	Macrophage 1 (M)	S100A6
HLA-DQB1	0	0.694887449	0.929	0.544	0	Macrophage 1 (M)	HLA-DQB1
HLA-DMA	0	0.640492293	0.88	0.518	0	Macrophage 1 (M)	HLA-DMA
TYMP	0	0.630318798	0.925	0.636	0	Macrophage 1 (M)	TYMP
SAT1	0	0.616004503	0.993	0.774	0	Macrophage 1 (M)	SAT1
CTSH	0	0.592299229	0.799	0.449	0	Macrophage 1 (M)	CTSH
MNDA	0	0.589617403	0.706	0.383	0	Macrophage 1 (M)	MNDA
IER3	0	0.577752121	0.936	0.622	0	Macrophage 1 (M)	IER3
TNFAIP2	0	0.566806988	0.736	0.41	0	Macrophage 1 (M)	TNFAIP2
PLAUR	0	0.564614443	0.883	0.522	0	Macrophage 1 (M)	PLAUR
SOD2	0	0.558631122	0.948	0.616	0	Macrophage 1 (M)	SOD2
NFKBIA	0	0.558055567	0.975	0.81	0	Macrophage 1 (M)	NFKBIA
CSTA	0	0.543390382	0.456	0.157	0	Macrophage 1 (M)	CSTA
AIF1	0	0.539562638	0.945	0.615	0	Macrophage 1 (M)	AIF1
PRDX1	0	0.538247929	0.872	0.63	0	Macrophage 1 (M)	PRDX1
FCGR3A	0	0.536045902	0.872	0.542	0	Macrophage 1 (M)	FCGR3A
C1orf162	0	0.531276909	0.733	0.393	0	Macrophage 1 (M)	C1orf162
DNASE2	0	0.530914631	0.631	0.308	0	Macrophage 1 (M)	DNASE2
HLA-DMB	0	0.520851925	0.811	0.468	0	Macrophage 1 (M)	HLA-DMB
S100A11	0	0.518460898	0.988	0.816	0	Macrophage 1 (M)	S100A11
LGALS3	0	0.51402327	0.912	0.554	0	Macrophage 1 (M)	LGALS3
CLEC4E	0	0.506744998	0.356	0.091	0	Macrophage 1 (M)	CLEC4E
TKT	0	0.502074343	0.706	0.401	0	Macrophage 1 (M)	TKT
TSPO	0	0.493098193	0.872	0.571	0	Macrophage 1 (M)	TSPO
PLXDC2	0	0.492913516	0.771	0.433	0	Macrophage 1 (M)	PLXDC2
TNFSF13B	0	0.48647046	0.728	0.41	0	Macrophage 1 (M)	TNFSF13B
CYBA	0	0.472415084	0.966	0.769	0	Macrophage 1 (M)	CYBA
CD74	0	0.466772592	0.995	0.762	0	Macrophage 1 (M)	CD74
VIM	0	0.440801402	0.991	0.833	0	Macrophage 1 (M)	VIM
PSAP	0	0.431942641	0.994	0.744	0	Macrophage 1 (M)	PSAP
GPX4	0	0.426580771	0.877	0.658	0	Macrophage 1 (M)	GPX4
CLEC12A	0	0.423245678	0.457	0.159	0	Macrophage 1 (M)	CLEC12A
FTL	0	0.400985129	1	0.915	0	Macrophage 1 (M)	FTL
TYROBP	0	0.396507712	0.987	0.822	0	Macrophage 1 (M)	TYROBP
TMSB10	0	0.360980977	0.994	0.97	0	Macrophage 1 (M)	TMSB10
OAZ1	0	0.340583319	0.97	0.839	0	Macrophage 1 (M)	OAZ1
CST3	0	0.313003479	0.984	0.687	0	Macrophage 1 (M)	CST3
FCER1G	2.70E-306	0.408023206	0.966	0.775	6.49E-302	Macrophage 1 (M)	FCER1G
NCF2	3.19E-306	0.470068151	0.677	0.37	7.67E-302	Macrophage 1 (M)	NCF2
ADA2	9.54E-305	0.440924082	0.726	0.413	2.29E-300	Macrophage 1 (M)	ADA2
FGL2	2.51E-302	0.471476983	0.709	0.379	6.04E-298	Macrophage 1 (M)	FGL2
SMCO4	4.40E-299	0.467544534	0.515	0.229	1.06E-294	Macrophage 1 (M)	SMCO4
SLAMF7	2.55E-298	0.57661404	0.498	0.205	6.12E-294	Macrophage 1 (M)	SLAMF7
SNX10	7.87E-290	0.564374014	0.669	0.385	1.89E-285	Macrophage 1 (M)	SNX10
PILRA	3.03E-288	0.443645829	0.58	0.288	7.27E-284	Macrophage 1 (M)	PILRA
EREG	1.61E-287	1.073856887	0.35	0.104	3.88E-283	Macrophage 1 (M)	EREG
CLEC7A	7.05E-287	0.428258915	0.673	0.364	1.70E-282	Macrophage 1 (M)	CLEC7A
NPC2	2.98E-281	0.391563491	0.956	0.682	7.15E-277	Macrophage 1 (M)	NPC2
G0S2	1.37E-280	0.999489974	0.439	0.177	3.29E-276	Macrophage 1 (M)	G0S2
TIMP1	6.36E-278	0.859116607	0.638	0.364	1.53E-273	Macrophage 1 (M)	TIMP1
CAPG	1.61E-276	0.431480206	0.855	0.568	3.86E-272	Macrophage 1 (M)	CAPG
ITGB2	8.16E-261	0.377587155	0.883	0.644	1.96E-256	Macrophage 1 (M)	ITGB2
SLC7A7	9.58E-255	0.405460457	0.579	0.305	2.30E-250	Macrophage 1 (M)	SLC7A7
PLEK	1.14E-253	0.523240218	0.844	0.584	2.73E-249	Macrophage 1 (M)	PLEK
CD44	1.42E-249	0.457310788	0.84	0.585	3.41E-245	Macrophage 1 (M)	CD44
IGSF6	3.88E-245	0.420033293	0.713	0.42	9.32E-241	Macrophage 1 (M)	IGSF6
PLBD1	4.47E-245	0.441436315	0.532	0.274	1.07E-240	Macrophage 1 (M)	PLBD1
HLA-C	2.43E-242	0.297388525	0.979	0.909	5.85E-238	Macrophage 1 (M)	HLA-C
S100A10	4.48E-242	0.431270205	0.895	0.635	1.08E-237	Macrophage 1 (M)	S100A10
GBP1	5.45E-242	0.753876127	0.588	0.337	1.31E-237	Macrophage 1 (M)	GBP1
CXCL16	1.03E-239	0.37968763	0.706	0.421	2.48E-235	Macrophage 1 (M)	CXCL16
GLUL	1.23E-238	0.33951298	0.902	0.618	2.96E-234	Macrophage 1 (M)	GLUL
ACP5	1.69E-237	0.428687426	0.673	0.38	4.06E-233	Macrophage 1 (M)	ACP5
ATOX1	1.16E-235	0.430690364	0.754	0.509	2.78E-231	Macrophage 1 (M)	ATOX1
GSTO1	8.57E-231	0.357900162	0.76	0.471	2.06E-226	Macrophage 1 (M)	GSTO1
NAMPT	8.59E-229	0.34916038	0.929	0.635	2.07E-224	Macrophage 1 (M)	NAMPT
AP1S2	1.49E-223	0.391912964	0.714	0.452	3.57E-219	Macrophage 1 (M)	AP1S2
CIITA	1.26E-221	0.362988524	0.552	0.28	3.03E-217	Macrophage 1 (M)	CIITA
LY86	2.12E-218	0.381415785	0.554	0.293	5.09E-214	Macrophage 1 (M)	LY86
NEAT1	3.72E-215	0.281417713	0.993	0.91	8.95E-211	Macrophage 1 (M)	NEAT1
GPR183	4.28E-213	0.562631326	0.702	0.457	1.03E-208	Macrophage 1 (M)	GPR183
PLIN2	1.30E-208	0.344288008	0.704	0.411	3.13E-204	Macrophage 1 (M)	PLIN2
CPVL	2.16E-206	0.26013106	0.702	0.419	5.20E-202	Macrophage 1 (M)	CPVL
ANXA5	7.24E-206	0.320984504	0.884	0.631	1.74E-201	Macrophage 1 (M)	ANXA5
S100A4	1.79E-205	0.523651121	0.861	0.649	4.29E-201	Macrophage 1 (M)	S100A4
CFD	4.91E-205	0.355707248	0.75	0.473	1.18E-200	Macrophage 1 (M)	CFD
TNFAIP3	9.37E-205	0.380387511	0.869	0.634	2.25E-200	Macrophage 1 (M)	TNFAIP3
GK	1.34E-204	0.438356695	0.423	0.193	3.22E-200	Macrophage 1 (M)	GK
GLRX	1.95E-204	0.347196583	0.626	0.368	4.69E-200	Macrophage 1 (M)	GLRX
SGK1	5.83E-204	0.32388784	0.839	0.543	1.40E-199	Macrophage 1 (M)	SGK1
ANXA2	5.78E-202	0.317305156	0.889	0.653	1.39E-197	Macrophage 1 (M)	ANXA2
GRN	1.59E-201	0.324417631	0.949	0.665	3.82E-197	Macrophage 1 (M)	GRN
CSF3R	1.71E-200	0.390009941	0.424	0.198	4.10E-196	Macrophage 1 (M)	CSF3R
ANPEP	3.52E-200	0.362186717	0.447	0.211	8.46E-196	Macrophage 1 (M)	ANPEP
SORL1	1.79E-198	0.397075767	0.503	0.258	4.30E-194	Macrophage 1 (M)	SORL1
PPT1	2.03E-198	0.344637028	0.714	0.442	4.87E-194	Macrophage 1 (M)	PPT1
LACTB	3.36E-198	0.346570919	0.581	0.325	8.07E-194	Macrophage 1 (M)	LACTB
GBP5	4.05E-198	0.462111681	0.446	0.207	9.73E-194	Macrophage 1 (M)	GBP5
CTSD	7.90E-198	0.327610118	0.942	0.767	1.90E-193	Macrophage 1 (M)	CTSD
SERF2	2.30E-197	0.259857336	0.966	0.903	5.52E-193	Macrophage 1 (M)	SERF2
GCHFR	4.03E-196	0.458574791	0.524	0.274	9.68E-192	Macrophage 1 (M)	GCHFR
C3	6.89E-195	0.492789117	0.436	0.206	1.66E-190	Macrophage 1 (M)	C3
LITAF	1.07E-194	0.338959762	0.846	0.605	2.57E-190	Macrophage 1 (M)	LITAF
GBP4	4.96E-193	0.422206027	0.473	0.233	1.19E-188	Macrophage 1 (M)	GBP4
GPNMB	7.42E-192	0.404966622	0.767	0.492	1.78E-187	Macrophage 1 (M)	GPNMB
SLC2A6	8.39E-192	0.325415255	0.277	0.091	2.02E-187	Macrophage 1 (M)	SLC2A6
DUSP1	3.32E-190	0.300936389	0.985	0.785	7.98E-186	Macrophage 1 (M)	DUSP1
CD9	5.34E-190	0.3281529	0.62	0.345	1.28E-185	Macrophage 1 (M)	CD9
IL18	3.22E-189	0.372978305	0.517	0.279	7.74E-185	Macrophage 1 (M)	IL18
TREM2	5.26E-189	0.355628231	0.619	0.354	1.26E-184	Macrophage 1 (M)	TREM2
MXD1	8.77E-189	0.416948884	0.527	0.289	2.11E-184	Macrophage 1 (M)	MXD1
ATP6V1F	2.36E-187	0.320464087	0.814	0.551	5.68E-183	Macrophage 1 (M)	ATP6V1F
CD68	1.33E-186	0.310966178	0.899	0.604	3.19E-182	Macrophage 1 (M)	CD68
MARCO	6.94E-186	0.624098663	0.368	0.161	1.67E-181	Macrophage 1 (M)	MARCO
ASAH1	1.37E-185	0.315861441	0.869	0.599	3.30E-181	Macrophage 1 (M)	ASAH1
ATF3	1.83E-182	0.297114967	0.813	0.539	4.40E-178	Macrophage 1 (M)	ATF3
CYBB	7.52E-182	0.273413928	0.797	0.523	1.81E-177	Macrophage 1 (M)	CYBB
RIPK2	9.64E-182	0.371276459	0.412	0.197	2.32E-177	Macrophage 1 (M)	RIPK2
CCL3L1	2.88E-181	0.462836086	0.72	0.458	6.91E-177	Macrophage 1 (M)	CCL3L1
PSTPIP2	4.51E-181	0.354435992	0.347	0.143	1.08E-176	Macrophage 1 (M)	PSTPIP2
LRRK2	2.97E-179	0.327983196	0.314	0.12	7.14E-175	Macrophage 1 (M)	LRRK2
PNRC1	1.17E-177	0.329202592	0.917	0.714	2.81E-173	Macrophage 1 (M)	PNRC1
SLC43A2	3.73E-176	0.36945186	0.51	0.278	8.97E-172	Macrophage 1 (M)	SLC43A2
MYOF	6.12E-174	0.342756935	0.455	0.239	1.47E-169	Macrophage 1 (M)	MYOF
CD83	2.12E-172	0.254443733	0.876	0.598	5.09E-168	Macrophage 1 (M)	CD83
FPR3	4.82E-172	0.330712712	0.626	0.377	1.16E-167	Macrophage 1 (M)	FPR3
DPYSL2	2.30E-171	0.33861574	0.673	0.427	5.53E-167	Macrophage 1 (M)	DPYSL2
CXCL10	6.87E-171	1.019077165	0.308	0.122	1.65E-166	Macrophage 1 (M)	CXCL10
NR1H3	1.45E-170	0.365383656	0.442	0.228	3.48E-166	Macrophage 1 (M)	NR1H3
CHMP1B	2.63E-170	0.394647136	0.611	0.38	6.32E-166	Macrophage 1 (M)	CHMP1B
EVI2B	3.57E-170	0.30898233	0.574	0.336	8.57E-166	Macrophage 1 (M)	EVI2B
SLC31A2	1.08E-169	0.31671932	0.439	0.226	2.60E-165	Macrophage 1 (M)	SLC31A2
IL4I1	1.50E-169	0.360339718	0.53	0.303	3.60E-165	Macrophage 1 (M)	IL4I1
SMIM25	2.85E-169	0.32360909	0.428	0.21	6.84E-165	Macrophage 1 (M)	SMIM25
TFEC	7.39E-169	0.301490653	0.552	0.313	1.78E-164	Macrophage 1 (M)	TFEC
CYP27A1	1.04E-168	0.369003638	0.408	0.202	2.49E-164	Macrophage 1 (M)	CYP27A1
KYNU	1.55E-168	0.337998604	0.398	0.193	3.71E-164	Macrophage 1 (M)	KYNU
RAB13	1.91E-166	0.324248402	0.462	0.246	4.59E-162	Macrophage 1 (M)	RAB13
GPCPD1	1.09E-165	0.345762307	0.538	0.309	2.62E-161	Macrophage 1 (M)	GPCPD1
FCGR1A	1.25E-165	0.323997322	0.554	0.32	3.01E-161	Macrophage 1 (M)	FCGR1A
BRI3	8.04E-164	0.297284058	0.846	0.583	1.93E-159	Macrophage 1 (M)	BRI3
ATP2B1-AS1	1.58E-163	0.38794755	0.45	0.235	3.81E-159	Macrophage 1 (M)	ATP2B1-AS1
GRINA	1.34E-161	0.308114232	0.594	0.363	3.22E-157	Macrophage 1 (M)	GRINA
RAB32	2.38E-161	0.294789332	0.505	0.28	5.73E-157	Macrophage 1 (M)	RAB32
VAMP8	6.02E-161	0.289397265	0.845	0.639	1.45E-156	Macrophage 1 (M)	VAMP8
GRB2	6.84E-161	0.288947248	0.802	0.575	1.64E-156	Macrophage 1 (M)	GRB2
RRAS	7.90E-161	0.280140716	0.375	0.177	1.90E-156	Macrophage 1 (M)	RRAS
LILRB2	1.36E-160	0.327454676	0.465	0.245	3.28E-156	Macrophage 1 (M)	LILRB2
CLEC10A	3.35E-160	0.296308141	0.292	0.111	8.04E-156	Macrophage 1 (M)	CLEC10A
AQP9	4.77E-160	0.397000303	0.365	0.169	1.15E-155	Macrophage 1 (M)	AQP9
STAT1	5.49E-160	0.340814406	0.743	0.536	1.32E-155	Macrophage 1 (M)	STAT1
PYCARD	3.27E-159	0.289158764	0.673	0.432	7.86E-155	Macrophage 1 (M)	PYCARD
SCPEP1	6.30E-159	0.30196838	0.605	0.371	1.51E-154	Macrophage 1 (M)	SCPEP1
FYB1	4.55E-158	0.280708445	0.866	0.649	1.09E-153	Macrophage 1 (M)	FYB1
C5AR1	1.83E-157	0.279748638	0.754	0.485	4.39E-153	Macrophage 1 (M)	C5AR1
AKR1A1	2.27E-157	0.302549697	0.65	0.42	5.46E-153	Macrophage 1 (M)	AKR1A1
CXCL2	5.87E-157	0.347061965	0.688	0.44	1.41E-152	Macrophage 1 (M)	CXCL2
RNF130	7.31E-157	0.286144662	0.745	0.499	1.76E-152	Macrophage 1 (M)	RNF130
ALOX5	1.28E-156	0.286201155	0.472	0.257	3.08E-152	Macrophage 1 (M)	ALOX5
PSME2	1.56E-156	0.370743027	0.713	0.526	3.76E-152	Macrophage 1 (M)	PSME2
JAML	2.04E-156	0.271076878	0.32	0.133	4.90E-152	Macrophage 1 (M)	JAML
SAMHD1	2.09E-156	0.288581552	0.795	0.556	5.03E-152	Macrophage 1 (M)	SAMHD1
YWHAH	2.76E-156	0.320277833	0.692	0.455	6.63E-152	Macrophage 1 (M)	YWHAH
CD40	9.06E-156	0.302949295	0.395	0.194	2.18E-151	Macrophage 1 (M)	CD40
KCNMA1	1.42E-155	0.28331332	0.358	0.164	3.42E-151	Macrophage 1 (M)	KCNMA1
TMEM176B	6.46E-154	0.274699005	0.766	0.514	1.55E-149	Macrophage 1 (M)	TMEM176B
ZFAND5	1.45E-153	0.294496947	0.762	0.535	3.49E-149	Macrophage 1 (M)	ZFAND5
ALDH1A1	3.42E-153	0.303345192	0.52	0.295	8.22E-149	Macrophage 1 (M)	ALDH1A1
IFNGR2	6.91E-153	0.297993946	0.63	0.397	1.66E-148	Macrophage 1 (M)	IFNGR2
LIPA	2.57E-152	0.299769122	0.676	0.427	6.17E-148	Macrophage 1 (M)	LIPA
P2RX7	6.91E-151	0.308544273	0.427	0.224	1.66E-146	Macrophage 1 (M)	P2RX7
SCIMP	8.82E-151	0.275213357	0.335	0.15	2.12E-146	Macrophage 1 (M)	SCIMP
CD72	2.18E-150	0.256424643	0.335	0.149	5.24E-146	Macrophage 1 (M)	CD72
PEA15	2.76E-150	0.320648138	0.545	0.324	6.63E-146	Macrophage 1 (M)	PEA15
DBI	3.46E-150	0.260145153	0.812	0.577	8.32E-146	Macrophage 1 (M)	DBI
SDCBP	4.18E-150	0.26438093	0.871	0.643	1.01E-145	Macrophage 1 (M)	SDCBP
NFKBIZ	5.93E-150	0.267465867	0.798	0.551	1.43E-145	Macrophage 1 (M)	NFKBIZ
SDS	1.20E-148	0.405816022	0.349	0.162	2.88E-144	Macrophage 1 (M)	SDS
OSCAR	3.07E-147	0.281229643	0.344	0.161	7.37E-143	Macrophage 1 (M)	OSCAR
CCL20	5.10E-146	0.610095413	0.289	0.12	1.23E-141	Macrophage 1 (M)	CCL20
ADAMDEC1	2.77E-145	0.350257925	0.347	0.158	6.65E-141	Macrophage 1 (M)	ADAMDEC1
TALDO1	7.02E-145	0.291128	0.667	0.447	1.69E-140	Macrophage 1 (M)	TALDO1
FPR1	8.59E-145	0.358444945	0.469	0.259	2.06E-140	Macrophage 1 (M)	FPR1
SQOR	9.71E-144	0.271744278	0.5	0.289	2.33E-139	Macrophage 1 (M)	SQOR
SERP1	1.07E-143	0.273514476	0.749	0.522	2.58E-139	Macrophage 1 (M)	SERP1
APOL3	1.28E-143	0.261924993	0.3	0.125	3.07E-139	Macrophage 1 (M)	APOL3
HCK	3.51E-142	0.295827443	0.524	0.311	8.43E-138	Macrophage 1 (M)	HCK
SLC11A1	3.90E-141	0.327365201	0.487	0.272	9.37E-137	Macrophage 1 (M)	SLC11A1
PLEKHO1	4.53E-141	0.336549226	0.645	0.439	1.09E-136	Macrophage 1 (M)	PLEKHO1
LAP3	1.87E-140	0.300116941	0.759	0.551	4.50E-136	Macrophage 1 (M)	LAP3
ZNF385A	6.16E-139	0.270251459	0.431	0.233	1.48E-134	Macrophage 1 (M)	ZNF385A
CDKN1A	3.09E-138	0.302252188	0.634	0.405	7.43E-134	Macrophage 1 (M)	CDKN1A
THEMIS2	5.25E-138	0.264259019	0.466	0.263	1.26E-133	Macrophage 1 (M)	THEMIS2
LILRB4	5.69E-138	0.277202413	0.577	0.358	1.37E-133	Macrophage 1 (M)	LILRB4
ADGRE2	3.20E-137	0.328143396	0.366	0.187	7.70E-133	Macrophage 1 (M)	ADGRE2
CCRL2	1.24E-136	0.312601716	0.362	0.181	2.97E-132	Macrophage 1 (M)	CCRL2
DSE	2.50E-136	0.293638955	0.646	0.417	6.01E-132	Macrophage 1 (M)	DSE
STX11	1.16E-135	0.280891047	0.364	0.181	2.78E-131	Macrophage 1 (M)	STX11
PTGS2	1.16E-135	0.555128861	0.351	0.176	2.78E-131	Macrophage 1 (M)	PTGS2
FLNA	7.62E-135	0.278371489	0.616	0.377	1.83E-130	Macrophage 1 (M)	FLNA
TMEM176A	7.17E-134	0.272401357	0.636	0.41	1.72E-129	Macrophage 1 (M)	TMEM176A
PDE4B	9.68E-134	0.299358324	0.486	0.276	2.33E-129	Macrophage 1 (M)	PDE4B
UBE2D1	2.37E-133	0.265320283	0.414	0.222	5.71E-129	Macrophage 1 (M)	UBE2D1
GCH1	2.66E-133	0.257535186	0.276	0.114	6.38E-129	Macrophage 1 (M)	GCH1
NAGK	3.09E-133	0.26316529	0.672	0.451	7.43E-129	Macrophage 1 (M)	NAGK
BASP1	1.06E-130	0.260163704	0.568	0.352	2.54E-126	Macrophage 1 (M)	BASP1
NAP1L1	1.26E-130	0.255600267	0.788	0.571	3.03E-126	Macrophage 1 (M)	NAP1L1
EMP3	1.70E-130	0.44446684	0.797	0.617	4.09E-126	Macrophage 1 (M)	EMP3
ALAS1	4.22E-128	0.270010866	0.357	0.183	1.02E-123	Macrophage 1 (M)	ALAS1
STXBP2	1.88E-126	0.28623968	0.469	0.274	4.53E-122	Macrophage 1 (M)	STXBP2
CPM	3.76E-126	0.373735785	0.55	0.344	9.04E-122	Macrophage 1 (M)	CPM
GM2A	8.85E-126	0.253792735	0.599	0.378	2.13E-121	Macrophage 1 (M)	GM2A
CHI3L1	2.69E-124	0.375555671	0.286	0.127	6.48E-120	Macrophage 1 (M)	CHI3L1
SLC8A1	9.17E-123	0.268405516	0.485	0.287	2.20E-118	Macrophage 1 (M)	SLC8A1
VMO1	1.08E-121	0.264375813	0.256	0.108	2.60E-117	Macrophage 1 (M)	VMO1
GPR84	2.66E-121	0.307999989	0.314	0.153	6.39E-117	Macrophage 1 (M)	GPR84
CALHM6	1.82E-115	0.35009931	0.277	0.128	4.37E-111	Macrophage 1 (M)	CALHM6
IFI30	5.49E-114	0.266612812	0.344	0.181	1.32E-109	Macrophage 1 (M)	IFI30
TXNIP	7.37E-114	0.28433351	0.843	0.681	1.77E-109	Macrophage 1 (M)	TXNIP
ACSL1	3.46E-112	0.315670332	0.468	0.284	8.32E-108	Macrophage 1 (M)	ACSL1
HBEGF	1.38E-111	0.29346658	0.426	0.247	3.32E-107	Macrophage 1 (M)	HBEGF
PABPC4	1.71E-110	0.301006193	0.601	0.403	4.12E-106	Macrophage 1 (M)	PABPC4
PPIF	2.89E-109	0.326857469	0.423	0.247	6.94E-105	Macrophage 1 (M)	PPIF
PTPRE	4.39E-109	0.262189469	0.578	0.381	1.05E-104	Macrophage 1 (M)	PTPRE
SERPING1	6.61E-109	0.279354833	0.614	0.424	1.59E-104	Macrophage 1 (M)	SERPING1
NLRP3	3.97E-108	0.514388577	0.33	0.176	9.53E-104	Macrophage 1 (M)	NLRP3
INSIG1	2.66E-98	0.282961118	0.408	0.239	6.40E-94	Macrophage 1 (M)	INSIG1
HGF	2.28E-93	0.304986642	0.259	0.127	5.49E-89	Macrophage 1 (M)	HGF
PFKFB3	2.47E-93	0.272388238	0.39	0.23	5.94E-89	Macrophage 1 (M)	PFKFB3
RARRES1	9.45E-91	0.257513503	0.279	0.141	2.27E-86	Macrophage 1 (M)	RARRES1
IL1RN	1.01E-86	0.33034962	0.38	0.225	2.43E-82	Macrophage 1 (M)	IL1RN
CYCS	1.30E-85	0.251292209	0.65	0.479	3.13E-81	Macrophage 1 (M)	CYCS
TNF	2.87E-81	0.438134146	0.382	0.235	6.90E-77	Macrophage 1 (M)	TNF
HES1	4.88E-71	0.320849691	0.516	0.361	1.17E-66	Macrophage 1 (M)	HES1
CD55	6.77E-66	0.305109958	0.428	0.287	1.63E-61	Macrophage 1 (M)	CD55
OSM	3.28E-64	0.327454188	0.277	0.164	7.89E-60	Macrophage 1 (M)	OSM
FN1	8.54E-60	0.290619831	0.909	0.832	2.05E-55	Macrophage 1 (M)	FN1
SELENOP	0	2.493994302	0.769	0.146	0	Macrophage 2 (M)	SELENOP
F13A1	0	2.483668859	0.703	0.105	0	Macrophage 2 (M)	F13A1
RNASE1	0	2.090842447	0.902	0.382	0	Macrophage 2 (M)	RNASE1
SLC40A1	0	1.984803724	0.627	0.118	0	Macrophage 2 (M)	SLC40A1
DAB2	0	1.89864299	0.883	0.443	0	Macrophage 2 (M)	DAB2
PLTP	0	1.736757944	0.862	0.363	0	Macrophage 2 (M)	PLTP
LYVE1	0	1.694029601	0.256	0.008	0	Macrophage 2 (M)	LYVE1
MAF	0	1.648740863	0.8	0.258	0	Macrophage 2 (M)	MAF
FOLR2	0	1.63680526	0.773	0.189	0	Macrophage 2 (M)	FOLR2
MRC1	0	1.60672509	0.741	0.196	0	Macrophage 2 (M)	MRC1
STAB1	0	1.391187022	0.727	0.225	0	Macrophage 2 (M)	STAB1
CD163	0	1.376666037	0.902	0.39	0	Macrophage 2 (M)	CD163
IGF1	0	1.282816537	0.46	0.037	0	Macrophage 2 (M)	IGF1
CD14	0	1.219471959	0.959	0.587	0	Macrophage 2 (M)	CD14
EGR1	0	1.185872579	0.809	0.445	0	Macrophage 2 (M)	EGR1
CD209	0	1.172201619	0.425	0.05	0	Macrophage 2 (M)	CD209
CCL13	0	1.096382055	0.268	0.03	0	Macrophage 2 (M)	CCL13
MS4A4A	0	1.091887377	0.791	0.402	0	Macrophage 2 (M)	MS4A4A
LILRB5	0	1.08926896	0.479	0.081	0	Macrophage 2 (M)	LILRB5
NRP1	0	1.088329706	0.643	0.228	0	Macrophage 2 (M)	NRP1
C1QA	0	1.075291088	0.989	0.617	0	Macrophage 2 (M)	C1QA
SLCO2B1	0	1.037691206	0.84	0.409	0	Macrophage 2 (M)	SLCO2B1
COLEC12	0	1.013720314	0.409	0.065	0	Macrophage 2 (M)	COLEC12
CCL8	0	1.010451768	0.29	0.059	0	Macrophage 2 (M)	CCL8
LGMN	0	1.006118501	0.942	0.56	0	Macrophage 2 (M)	LGMN
FCGR2A	0	0.994954036	0.877	0.505	0	Macrophage 2 (M)	FCGR2A
PMP22	0	0.98765042	0.572	0.215	0	Macrophage 2 (M)	PMP22
A2M	0	0.985750169	0.872	0.496	0	Macrophage 2 (M)	A2M
SPRED1	0	0.952093266	0.586	0.217	0	Macrophage 2 (M)	SPRED1
MPEG1	0	0.949837326	0.629	0.225	0	Macrophage 2 (M)	MPEG1
HSPA1A	0	0.946713897	0.83	0.55	0	Macrophage 2 (M)	HSPA1A
WWP1	0	0.941345231	0.479	0.15	0	Macrophage 2 (M)	WWP1
CD93	0	0.93859051	0.452	0.117	0	Macrophage 2 (M)	CD93
GPR34	0	0.938582693	0.483	0.115	0	Macrophage 2 (M)	GPR34
C1QC	0	0.928359375	0.964	0.569	0	Macrophage 2 (M)	C1QC
CSF1R	0	0.903220117	0.839	0.531	0	Macrophage 2 (M)	CSF1R
ENPP2	0	0.880466765	0.374	0.04	0	Macrophage 2 (M)	ENPP2
IFI44L	0	0.870070551	0.73	0.389	0	Macrophage 2 (M)	IFI44L
KCTD12	0	0.869665792	0.823	0.517	0	Macrophage 2 (M)	KCTD12
C1QB	0	0.869287795	0.978	0.606	0	Macrophage 2 (M)	C1QB
MTSS1	0	0.866404348	0.494	0.152	0	Macrophage 2 (M)	MTSS1
SIGLEC1	0	0.866281959	0.697	0.3	0	Macrophage 2 (M)	SIGLEC1
MS4A6A	0	0.861306827	0.892	0.563	0	Macrophage 2 (M)	MS4A6A
ZFP36L1	0	0.85044875	0.96	0.748	0	Macrophage 2 (M)	ZFP36L1
VSIG4	0	0.843659083	0.734	0.359	0	Macrophage 2 (M)	VSIG4
GAS6	0	0.842479375	0.442	0.084	0	Macrophage 2 (M)	GAS6
CCL2	0	0.839037744	0.421	0.131	0	Macrophage 2 (M)	CCL2
C2	0	0.830191289	0.739	0.374	0	Macrophage 2 (M)	C2
FCGRT	0	0.810091817	0.943	0.673	0	Macrophage 2 (M)	FCGRT
IGFBP4	0	0.79676786	0.318	0.045	0	Macrophage 2 (M)	IGFBP4
MS4A7	0	0.789027537	0.916	0.653	0	Macrophage 2 (M)	MS4A7
RGL1	0	0.778142811	0.468	0.148	0	Macrophage 2 (M)	RGL1
ITPR2	0	0.752782825	0.625	0.303	0	Macrophage 2 (M)	ITPR2
LGALS3BP	0	0.742383344	0.701	0.4	0	Macrophage 2 (M)	LGALS3BP
ITSN1	0	0.727928214	0.422	0.126	0	Macrophage 2 (M)	ITSN1
TTYH3	0	0.721687476	0.602	0.297	0	Macrophage 2 (M)	TTYH3
CREG1	0	0.715956287	0.826	0.52	0	Macrophage 2 (M)	CREG1
PDGFC	0	0.686040333	0.342	0.074	0	Macrophage 2 (M)	PDGFC
OLFML2B	0	0.65053306	0.38	0.099	0	Macrophage 2 (M)	OLFML2B
GATM	0	0.608235049	0.29	0.055	0	Macrophage 2 (M)	GATM
ITM2B	0	0.586720099	0.98	0.882	0	Macrophage 2 (M)	ITM2B
IFITM3	3.28E-307	0.680281403	0.866	0.608	7.89E-303	Macrophage 2 (M)	IFITM3
MARCKS	1.31E-306	0.52004978	0.947	0.714	3.16E-302	Macrophage 2 (M)	MARCKS
KLF6	4.67E-304	0.649293745	0.969	0.832	1.12E-299	Macrophage 2 (M)	KLF6
BMP2K	2.14E-302	0.640487982	0.719	0.434	5.15E-298	Macrophage 2 (M)	BMP2K
NAIP	1.62E-301	0.717960537	0.612	0.308	3.90E-297	Macrophage 2 (M)	NAIP
ABCA1	5.11E-296	0.70588041	0.678	0.375	1.23E-291	Macrophage 2 (M)	ABCA1
FRMD4B	2.89E-295	0.663556198	0.614	0.319	6.94E-291	Macrophage 2 (M)	FRMD4B
LPAR6	1.04E-292	0.644924315	0.524	0.226	2.51E-288	Macrophage 2 (M)	LPAR6
FOSB	1.82E-292	0.631249363	0.939	0.778	4.37E-288	Macrophage 2 (M)	FOSB
HSPA1B	1.77E-287	0.959082259	0.621	0.323	4.26E-283	Macrophage 2 (M)	HSPA1B
FOS	1.11E-281	0.496458632	0.989	0.891	2.68E-277	Macrophage 2 (M)	FOS
SPATS2L	6.79E-280	0.645244722	0.521	0.234	1.63E-275	Macrophage 2 (M)	SPATS2L
PLD3	7.78E-279	0.573964865	0.851	0.568	1.87E-274	Macrophage 2 (M)	PLD3
RUNX1	1.60E-275	0.760757829	0.594	0.317	3.85E-271	Macrophage 2 (M)	RUNX1
CD4	1.87E-275	0.602756223	0.754	0.49	4.50E-271	Macrophage 2 (M)	CD4
ADAP2	2.91E-274	0.610981893	0.747	0.477	6.99E-270	Macrophage 2 (M)	ADAP2
FAM20A	1.33E-271	0.675995499	0.393	0.14	3.20E-267	Macrophage 2 (M)	FAM20A
CTSC	4.92E-263	0.549012032	0.937	0.738	1.18E-258	Macrophage 2 (M)	CTSC
MAFB	5.80E-263	0.599879099	0.84	0.592	1.39E-258	Macrophage 2 (M)	MAFB
KLF2	2.39E-259	0.734091821	0.681	0.394	5.74E-255	Macrophage 2 (M)	KLF2
CCR1	5.33E-258	0.619518211	0.596	0.313	1.28E-253	Macrophage 2 (M)	CCR1
TMEM176B1	9.50E-258	0.532389607	0.864	0.579	2.28E-253	Macrophage 2 (M)	TMEM176B
MEF2C	2.12E-257	0.706341287	0.614	0.343	5.09E-253	Macrophage 2 (M)	MEF2C
TIMP2	1.09E-255	0.53828011	0.822	0.562	2.63E-251	Macrophage 2 (M)	TIMP2
CD59	4.33E-255	0.625567869	0.564	0.285	1.04E-250	Macrophage 2 (M)	CD59
SNX6	1.90E-253	0.589938449	0.772	0.547	4.57E-249	Macrophage 2 (M)	SNX6
NFATC2	3.08E-252	0.464588079	0.281	0.069	7.40E-248	Macrophage 2 (M)	NFATC2
MFSD1	7.42E-252	0.546815705	0.796	0.546	1.78E-247	Macrophage 2 (M)	MFSD1
TCF4	3.41E-246	0.613607707	0.541	0.274	8.19E-242	Macrophage 2 (M)	TCF4
CR1	8.76E-245	0.567646809	0.313	0.093	2.11E-240	Macrophage 2 (M)	CR1
NR4A2	1.31E-241	0.66334245	0.879	0.708	3.16E-237	Macrophage 2 (M)	NR4A2
IDH1	5.45E-240	0.615586154	0.536	0.276	1.31E-235	Macrophage 2 (M)	IDH1
1-Mar	1.22E-237	0.584233394	0.696	0.448	2.93E-233	Macrophage 2 (M)	1-Mar
FUCA1	2.07E-236	0.631157885	0.595	0.334	4.97E-232	Macrophage 2 (M)	FUCA1
TLR4	1.64E-233	0.619583287	0.579	0.323	3.94E-229	Macrophage 2 (M)	TLR4
CMKLR1	2.34E-233	0.569844446	0.501	0.247	5.62E-229	Macrophage 2 (M)	CMKLR1
QKI	4.26E-232	0.542539548	0.741	0.494	1.02E-227	Macrophage 2 (M)	QKI
CYBB1	1.51E-228	0.548754595	0.862	0.606	3.63E-224	Macrophage 2 (M)	CYBB
IFIT1	1.90E-228	0.610041547	0.397	0.153	4.57E-224	Macrophage 2 (M)	IFIT1
ARHGAP18	5.48E-228	0.571459801	0.754	0.529	1.32E-223	Macrophage 2 (M)	ARHGAP18
EGR2	1.39E-227	0.772737031	0.445	0.198	3.35E-223	Macrophage 2 (M)	EGR2
EPHX1	3.33E-219	0.523474658	0.353	0.129	8.00E-215	Macrophage 2 (M)	EPHX1
CTSZ	2.65E-218	0.471300549	0.961	0.761	6.37E-214	Macrophage 2 (M)	CTSZ
RASSF4	5.01E-215	0.514181609	0.675	0.435	1.20E-210	Macrophage 2 (M)	RASSF4
SPP1	1.05E-213	1.173677914	0.637	0.391	2.52E-209	Macrophage 2 (M)	SPP1
JUN	4.21E-213	0.571175414	0.935	0.789	1.01E-208	Macrophage 2 (M)	JUN
RBPJ	1.32E-210	0.628513631	0.755	0.543	3.18E-206	Macrophage 2 (M)	RBPJ
NCOA4	5.28E-209	0.591170135	0.718	0.503	1.27E-204	Macrophage 2 (M)	NCOA4
CLTC	1.54E-208	0.58953382	0.688	0.463	3.69E-204	Macrophage 2 (M)	CLTC
RB1	9.58E-205	0.546359534	0.547	0.299	2.30E-200	Macrophage 2 (M)	RB1
MKNK1	1.61E-204	0.570013139	0.456	0.221	3.88E-200	Macrophage 2 (M)	MKNK1
NINJ1	6.62E-203	0.567780339	0.679	0.444	1.59E-198	Macrophage 2 (M)	NINJ1
RSAD2	2.69E-201	0.529121982	0.384	0.151	6.48E-197	Macrophage 2 (M)	RSAD2
EPS8	5.66E-201	0.55214849	0.324	0.117	1.36E-196	Macrophage 2 (M)	EPS8
NRP2	9.84E-200	0.556852677	0.613	0.379	2.37E-195	Macrophage 2 (M)	NRP2
TBC1D14	4.18E-199	0.469049001	0.314	0.11	1.01E-194	Macrophage 2 (M)	TBC1D14
EPS15	6.19E-197	0.550818983	0.491	0.255	1.49E-192	Macrophage 2 (M)	EPS15
RAP2B	6.21E-193	0.497160527	0.683	0.463	1.49E-188	Macrophage 2 (M)	RAP2B
NRIP1	3.46E-192	0.558854192	0.517	0.283	8.31E-188	Macrophage 2 (M)	NRIP1
CPEB4	9.78E-192	0.562625286	0.549	0.316	2.35E-187	Macrophage 2 (M)	CPEB4
C3AR1	5.74E-191	0.514308778	0.713	0.495	1.38E-186	Macrophage 2 (M)	C3AR1
AP2A2	1.06E-190	0.509594973	0.576	0.339	2.54E-186	Macrophage 2 (M)	AP2A2
IFI27	1.54E-190	0.802900032	0.535	0.28	3.71E-186	Macrophage 2 (M)	IFI27
ETV5	2.52E-189	0.452640889	0.272	0.087	6.06E-185	Macrophage 2 (M)	ETV5
ZFHX3	2.70E-185	0.520740025	0.596	0.362	6.49E-181	Macrophage 2 (M)	ZFHX3
BIN1	2.85E-185	0.521345908	0.289	0.098	6.86E-181	Macrophage 2 (M)	BIN1
WDFY3	1.31E-184	0.482208429	0.333	0.13	3.15E-180	Macrophage 2 (M)	WDFY3
CEBPD	5.58E-184	0.491124174	0.739	0.504	1.34E-179	Macrophage 2 (M)	CEBPD
MYO5A	7.25E-183	0.537427009	0.497	0.27	1.74E-178	Macrophage 2 (M)	MYO5A
NAMPT1	1.61E-182	0.434601297	0.919	0.746	3.88E-178	Macrophage 2 (M)	NAMPT
CCL3	2.98E-182	0.448209159	0.944	0.76	7.15E-178	Macrophage 2 (M)	CCL3
SLC9A9	1.86E-180	0.48273852	0.297	0.106	4.46E-176	Macrophage 2 (M)	SLC9A9
CYTH4	2.80E-179	0.527212409	0.514	0.285	6.72E-175	Macrophage 2 (M)	CYTH4
TNFRSF1A	1.10E-178	0.52639796	0.554	0.333	2.64E-174	Macrophage 2 (M)	TNFRSF1A
IFI44	1.26E-177	0.500667299	0.46	0.228	3.04E-173	Macrophage 2 (M)	IFI44
SDC3	1.77E-177	0.549417665	0.443	0.225	4.26E-173	Macrophage 2 (M)	SDC3
MAN1A1	1.51E-175	0.706882064	0.468	0.256	3.63E-171	Macrophage 2 (M)	MAN1A1
GOLGA4	9.13E-175	0.501323152	0.667	0.462	2.19E-170	Macrophage 2 (M)	GOLGA4
IL6ST	9.24E-175	0.521387613	0.468	0.244	2.22E-170	Macrophage 2 (M)	IL6ST
AP1B1	1.00E-174	0.471892201	0.627	0.398	2.41E-170	Macrophage 2 (M)	AP1B1
DNAJB1	1.79E-174	0.679342994	0.655	0.44	4.31E-170	Macrophage 2 (M)	DNAJB1
SNX9	2.19E-174	0.524724211	0.459	0.241	5.27E-170	Macrophage 2 (M)	SNX9
ICAM1	3.01E-171	0.499374116	0.732	0.512	7.23E-167	Macrophage 2 (M)	ICAM1
BTG2	3.74E-169	0.540971705	0.759	0.568	8.99E-165	Macrophage 2 (M)	BTG2
AXL	1.04E-168	0.527341208	0.459	0.242	2.51E-164	Macrophage 2 (M)	AXL
NR4A1	2.51E-168	0.54859699	0.655	0.427	6.02E-164	Macrophage 2 (M)	NR4A1
ANKH	3.05E-168	0.548583265	0.324	0.13	7.34E-164	Macrophage 2 (M)	ANKH
VMP1	3.55E-168	0.551182338	0.746	0.547	8.53E-164	Macrophage 2 (M)	VMP1
CCND1	8.05E-168	0.476860756	0.263	0.089	1.94E-163	Macrophage 2 (M)	CCND1
IER2	4.51E-167	0.472758465	0.914	0.79	1.08E-162	Macrophage 2 (M)	IER2
PEAK1	5.03E-166	0.423883025	0.29	0.106	1.21E-161	Macrophage 2 (M)	PEAK1
FCHSD2	1.37E-164	0.494292353	0.35	0.153	3.30E-160	Macrophage 2 (M)	FCHSD2
GRN1	3.89E-164	0.365056252	0.967	0.764	9.35E-160	Macrophage 2 (M)	GRN
ARL4C	3.75E-163	0.596675266	0.504	0.275	9.00E-159	Macrophage 2 (M)	ARL4C
SERPING11	8.65E-163	0.476341652	0.722	0.463	2.08E-158	Macrophage 2 (M)	SERPING1
ETS2	7.17E-162	0.501640593	0.435	0.218	1.72E-157	Macrophage 2 (M)	ETS2
ITGB5	1.13E-160	0.43754469	0.332	0.138	2.71E-156	Macrophage 2 (M)	ITGB5
PRNP	2.83E-160	0.463977756	0.595	0.375	6.79E-156	Macrophage 2 (M)	PRNP
RBMS1	3.53E-160	0.472054545	0.612	0.396	8.49E-156	Macrophage 2 (M)	RBMS1
IFIT3	2.78E-158	0.531179849	0.531	0.312	6.67E-154	Macrophage 2 (M)	IFIT3
HSP90AA1	8.11E-158	0.534758035	0.974	0.922	1.95E-153	Macrophage 2 (M)	HSP90AA1
MX2	2.63E-157	0.492373656	0.569	0.345	6.33E-153	Macrophage 2 (M)	MX2
DUSP11	1.57E-154	0.340056341	0.981	0.86	3.77E-150	Macrophage 2 (M)	DUSP1
CHSY1	4.84E-153	0.401395022	0.266	0.096	1.16E-148	Macrophage 2 (M)	CHSY1
HSPH1	1.01E-150	0.691228464	0.628	0.441	2.43E-146	Macrophage 2 (M)	HSPH1
CXCL8	6.55E-150	0.65170893	0.745	0.55	1.57E-145	Macrophage 2 (M)	CXCL8
MX1	1.13E-149	0.44371364	0.682	0.486	2.70E-145	Macrophage 2 (M)	MX1
MT-ND2	1.99E-149	0.285286182	0.994	0.984	4.77E-145	Macrophage 2 (M)	MT-ND2
SLC7A8	3.19E-149	0.409495183	0.299	0.12	7.67E-145	Macrophage 2 (M)	SLC7A8
XAF1	1.32E-148	0.464512729	0.675	0.476	3.18E-144	Macrophage 2 (M)	XAF1
RNASET2	2.74E-147	0.384030718	0.83	0.645	6.57E-143	Macrophage 2 (M)	RNASET2
FAM198B	2.50E-144	0.491938713	0.36	0.174	6.00E-140	Macrophage 2 (M)	FAM198B
PLXND1	2.53E-144	0.462958697	0.537	0.336	6.09E-140	Macrophage 2 (M)	PLXND1
TPP1	2.67E-144	0.398496988	0.782	0.613	6.41E-140	Macrophage 2 (M)	TPP1
ZEB2	9.23E-144	0.353981831	0.907	0.723	2.22E-139	Macrophage 2 (M)	ZEB2
RNASE6	1.81E-141	0.45385357	0.509	0.308	4.35E-137	Macrophage 2 (M)	RNASE6
CCL4	3.08E-141	0.332722543	0.868	0.7	7.41E-137	Macrophage 2 (M)	CCL4
TLR7	4.20E-139	0.421118849	0.367	0.177	1.01E-134	Macrophage 2 (M)	TLR7
MGAT4A	1.28E-138	0.44249156	0.576	0.377	3.08E-134	Macrophage 2 (M)	MGAT4A
TMEM176A1	3.48E-138	0.387243324	0.695	0.477	8.37E-134	Macrophage 2 (M)	TMEM176A
RBM47	1.07E-137	0.432688659	0.629	0.443	2.57E-133	Macrophage 2 (M)	RBM47
MCL1	1.58E-137	0.356547685	0.921	0.802	3.80E-133	Macrophage 2 (M)	MCL1
FMN1	2.18E-133	0.383861139	0.276	0.114	5.24E-129	Macrophage 2 (M)	FMN1
AKR1B1	2.25E-133	0.410882768	0.561	0.359	5.41E-129	Macrophage 2 (M)	AKR1B1
ARRDC3	5.30E-133	0.534322897	0.397	0.207	1.27E-128	Macrophage 2 (M)	ARRDC3
ABCC5	1.14E-130	0.409040265	0.296	0.129	2.73E-126	Macrophage 2 (M)	ABCC5
DUSP6	3.86E-130	0.544102783	0.389	0.199	9.29E-126	Macrophage 2 (M)	DUSP6
CYFIP1	3.15E-129	0.442830916	0.589	0.403	7.57E-125	Macrophage 2 (M)	CYFIP1
PYGL	2.32E-128	0.505489812	0.345	0.17	5.59E-124	Macrophage 2 (M)	PYGL
ZFP36	3.99E-127	0.352827209	0.933	0.822	9.59E-123	Macrophage 2 (M)	ZFP36
SGMS1	4.97E-127	0.424639286	0.337	0.163	1.19E-122	Macrophage 2 (M)	SGMS1
CITED2	4.41E-126	0.579906368	0.463	0.278	1.06E-121	Macrophage 2 (M)	CITED2
TACC1	1.38E-125	0.40162341	0.639	0.456	3.31E-121	Macrophage 2 (M)	TACC1
ST6GAL1	1.77E-125	0.428634876	0.288	0.126	4.25E-121	Macrophage 2 (M)	ST6GAL1
FCHO2	9.04E-124	0.41036191	0.509	0.323	2.17E-119	Macrophage 2 (M)	FCHO2
WSB1	6.74E-123	0.383492009	0.757	0.592	1.62E-118	Macrophage 2 (M)	WSB1
IFI16	1.28E-122	0.342147248	0.807	0.655	3.06E-118	Macrophage 2 (M)	IFI16
COLGALT1	3.66E-122	0.420536529	0.514	0.325	8.80E-118	Macrophage 2 (M)	COLGALT1
TNS3	2.75E-121	0.422304223	0.528	0.344	6.61E-117	Macrophage 2 (M)	TNS3
SESN1	3.33E-120	0.413609427	0.269	0.114	8.01E-116	Macrophage 2 (M)	SESN1
NEAT11	5.87E-120	0.325505205	0.994	0.94	1.41E-115	Macrophage 2 (M)	NEAT1
SNX2	1.12E-119	0.420121911	0.625	0.456	2.69E-115	Macrophage 2 (M)	SNX2
OTUD1	1.83E-119	0.543670427	0.506	0.323	4.41E-115	Macrophage 2 (M)	OTUD1
BLVRB	2.34E-119	0.398826985	0.698	0.527	5.62E-115	Macrophage 2 (M)	BLVRB
RAB31	8.91E-119	0.410297029	0.653	0.484	2.14E-114	Macrophage 2 (M)	RAB31
UNC93B1	1.93E-117	0.394697907	0.614	0.44	4.63E-113	Macrophage 2 (M)	UNC93B1
LAIR1	4.03E-117	0.390560641	0.674	0.497	9.69E-113	Macrophage 2 (M)	LAIR1
MMP14	4.41E-117	0.398653583	0.439	0.259	1.06E-112	Macrophage 2 (M)	MMP14
PLSCR1	7.88E-117	0.379139556	0.624	0.444	1.89E-112	Macrophage 2 (M)	PLSCR1
CD831	2.16E-116	0.374186709	0.863	0.704	5.19E-112	Macrophage 2 (M)	CD83
NPL	2.57E-116	0.397314202	0.584	0.405	6.19E-112	Macrophage 2 (M)	NPL
SLC11A2	7.74E-116	0.439513992	0.388	0.216	1.86E-111	Macrophage 2 (M)	SLC11A2
CTSL	8.54E-116	0.278990843	0.891	0.681	2.05E-111	Macrophage 2 (M)	CTSL
ARHGAP5	2.56E-115	0.376119455	0.29	0.132	6.14E-111	Macrophage 2 (M)	ARHGAP5
MERTK	9.20E-115	0.386922119	0.316	0.151	2.21E-110	Macrophage 2 (M)	MERTK
XIST	1.67E-114	0.401644931	0.842	0.748	4.02E-110	Macrophage 2 (M)	XIST
GNAS	1.67E-113	0.302642045	0.891	0.749	4.01E-109	Macrophage 2 (M)	GNAS
CFD1	1.87E-113	0.376861934	0.763	0.571	4.50E-109	Macrophage 2 (M)	CFD
AC007952.4	2.99E-113	0.477158262	0.357	0.187	7.18E-109	Macrophage 2 (M)	AC007952.4
IFIH1	8.45E-113	0.424362035	0.477	0.301	2.03E-108	Macrophage 2 (M)	IFIH1
FAM13A	1.98E-112	0.382413124	0.271	0.12	4.77E-108	Macrophage 2 (M)	FAM13A
RHOB	2.63E-112	0.46322793	0.585	0.397	6.32E-108	Macrophage 2 (M)	RHOB
FOXO3	4.05E-112	0.449299377	0.436	0.262	9.72E-108	Macrophage 2 (M)	FOXO3
OAS2	5.78E-112	0.387462273	0.465	0.285	1.39E-107	Macrophage 2 (M)	OAS2
ADAM9	9.51E-112	0.444790447	0.446	0.274	2.28E-107	Macrophage 2 (M)	ADAM9
GADD45B	4.88E-111	0.369862244	0.862	0.732	1.17E-106	Macrophage 2 (M)	GADD45B
FRMD4A	1.81E-110	0.372740978	0.364	0.196	4.34E-106	Macrophage 2 (M)	FRMD4A
EPB41L3	4.40E-110	0.41318773	0.508	0.337	1.06E-105	Macrophage 2 (M)	EPB41L3
HNRNPU	7.19E-110	0.468924401	0.873	0.759	1.73E-105	Macrophage 2 (M)	HNRNPU
HNMT	7.67E-110	0.394788508	0.581	0.409	1.84E-105	Macrophage 2 (M)	HNMT
CCNL1	1.03E-109	0.374594179	0.812	0.689	2.47E-105	Macrophage 2 (M)	CCNL1
GPR155	1.16E-108	0.389794082	0.344	0.179	2.78E-104	Macrophage 2 (M)	GPR155
IQGAP2	1.23E-107	0.405113133	0.624	0.462	2.95E-103	Macrophage 2 (M)	IQGAP2
EHD4	5.30E-107	0.419078493	0.465	0.296	1.27E-102	Macrophage 2 (M)	EHD4
LAMP1	2.94E-106	0.332964458	0.691	0.506	7.08E-102	Macrophage 2 (M)	LAMP1
EPB41L2	3.75E-106	0.404588273	0.351	0.19	9.01E-102	Macrophage 2 (M)	EPB41L2
AFF1	6.05E-106	0.366856233	0.356	0.193	1.46E-101	Macrophage 2 (M)	AFF1
KLF4	1.23E-105	0.456040226	0.633	0.464	2.95E-101	Macrophage 2 (M)	KLF4
RIN2	1.47E-105	0.411717414	0.366	0.205	3.52E-101	Macrophage 2 (M)	RIN2
EMB	3.75E-105	0.391618058	0.359	0.187	9.02E-101	Macrophage 2 (M)	EMB
PLAU	7.99E-105	0.491918645	0.407	0.235	1.92E-100	Macrophage 2 (M)	PLAU
PTMS	9.31E-105	0.375246626	0.611	0.441	2.24E-100	Macrophage 2 (M)	PTMS
FAM213A	1.46E-104	0.365321951	0.307	0.153	3.50E-100	Macrophage 2 (M)	FAM213A
PARP14	2.08E-104	0.364197172	0.674	0.509	4.99E-100	Macrophage 2 (M)	PARP14
TFRC	1.68E-103	0.539596589	0.635	0.472	4.03E-99	Macrophage 2 (M)	TFRC
C6orf62	1.97E-103	0.376671153	0.638	0.474	4.75E-99	Macrophage 2 (M)	C6orf62
MFHAS1	4.65E-103	0.324769736	0.253	0.111	1.12E-98	Macrophage 2 (M)	MFHAS1
MACF1	6.39E-102	0.327520575	0.638	0.467	1.54E-97	Macrophage 2 (M)	MACF1
MCOLN1	2.51E-101	0.399126983	0.378	0.218	6.04E-97	Macrophage 2 (M)	MCOLN1
LY96	4.95E-101	0.380356204	0.576	0.418	1.19E-96	Macrophage 2 (M)	LY96
PARP9	4.72E-100	0.37010922	0.521	0.353	1.13E-95	Macrophage 2 (M)	PARP9
ANKRD12	6.74E-100	0.339110656	0.709	0.55	1.62E-95	Macrophage 2 (M)	ANKRD12
TGFBR2	3.33E-99	0.363861704	0.438	0.27	7.99E-95	Macrophage 2 (M)	TGFBR2
CCL4L2	1.48E-98	0.433162866	0.698	0.526	3.57E-94	Macrophage 2 (M)	CCL4L2
SH2B3	2.13E-98	0.401492425	0.443	0.281	5.13E-94	Macrophage 2 (M)	SH2B3
PLA2G15	1.14E-97	0.410796972	0.409	0.25	2.74E-93	Macrophage 2 (M)	PLA2G15
CD741	2.55E-97	0.306881049	0.937	0.863	6.13E-93	Macrophage 2 (M)	CD74
IFI6	3.16E-97	0.370966918	0.762	0.619	7.60E-93	Macrophage 2 (M)	IFI6
GNS	2.95E-96	0.348927153	0.63	0.472	7.09E-92	Macrophage 2 (M)	GNS
GYPC	6.94E-96	0.384240463	0.512	0.343	1.67E-91	Macrophage 2 (M)	GYPC
TCF12	1.33E-95	0.376714548	0.334	0.182	3.19E-91	Macrophage 2 (M)	TCF12
SASH1	8.84E-94	0.334663564	0.257	0.121	2.12E-89	Macrophage 2 (M)	SASH1
ATP1B1	1.16E-93	0.504401558	0.528	0.373	2.80E-89	Macrophage 2 (M)	ATP1B1
HMOX1	1.50E-93	0.507572763	0.681	0.522	3.62E-89	Macrophage 2 (M)	HMOX1
SIRPA	2.75E-93	0.36367327	0.56	0.403	6.61E-89	Macrophage 2 (M)	SIRPA
NFKBID	6.48E-93	0.419410491	0.544	0.385	1.56E-88	Macrophage 2 (M)	NFKBID
APLP2	6.82E-93	0.314162235	0.836	0.668	1.64E-88	Macrophage 2 (M)	APLP2
DSC2	1.76E-92	0.329836516	0.295	0.15	4.22E-88	Macrophage 2 (M)	DSC2
CCL3L11	8.66E-91	0.356548348	0.729	0.552	2.08E-86	Macrophage 2 (M)	CCL3L1
GIMAP6	1.26E-90	0.2876401	0.266	0.128	3.02E-86	Macrophage 2 (M)	GIMAP6
BCAT1	9.01E-90	0.407366537	0.395	0.242	2.17E-85	Macrophage 2 (M)	BCAT1
TMEM106A	2.18E-89	0.36033674	0.306	0.165	5.23E-85	Macrophage 2 (M)	TMEM106A
ARHGAP21	1.83E-88	0.329548774	0.278	0.14	4.41E-84	Macrophage 2 (M)	ARHGAP21
TRIM14	3.21E-88	0.37242345	0.386	0.238	7.71E-84	Macrophage 2 (M)	TRIM14
LRP1	1.33E-87	0.319719691	0.647	0.486	3.21E-83	Macrophage 2 (M)	LRP1
DENND3	7.80E-87	0.357354758	0.329	0.183	1.88E-82	Macrophage 2 (M)	DENND3
WASHC4	7.39E-86	0.347866362	0.501	0.348	1.78E-81	Macrophage 2 (M)	WASHC4
ATF31	6.29E-85	0.375386914	0.776	0.65	1.51E-80	Macrophage 2 (M)	ATF3
NFIC	1.15E-84	0.348845073	0.452	0.303	2.75E-80	Macrophage 2 (M)	NFIC
EIF2AK2	3.73E-84	0.332520119	0.524	0.367	8.97E-80	Macrophage 2 (M)	EIF2AK2
NABP1	4.04E-84	0.402493497	0.598	0.445	9.72E-80	Macrophage 2 (M)	NABP1
DUSP3	4.51E-84	0.372436912	0.395	0.249	1.08E-79	Macrophage 2 (M)	DUSP3
GAA	6.27E-84	0.324991283	0.581	0.434	1.51E-79	Macrophage 2 (M)	GAA
TSPAN4	9.18E-83	0.324657921	0.539	0.384	2.21E-78	Macrophage 2 (M)	TSPAN4
NCF4	1.16E-82	0.357996947	0.418	0.272	2.79E-78	Macrophage 2 (M)	NCF4
HELZ	6.01E-82	0.317818351	0.407	0.254	1.44E-77	Macrophage 2 (M)	HELZ
SNX5	2.47E-81	0.339413625	0.488	0.341	5.93E-77	Macrophage 2 (M)	SNX5
FAM91A1	7.70E-81	0.339312409	0.342	0.202	1.85E-76	Macrophage 2 (M)	FAM91A1
CAPZB	3.22E-80	0.292704348	0.767	0.645	7.75E-76	Macrophage 2 (M)	CAPZB
KIF1B	3.31E-80	0.378752785	0.357	0.217	7.95E-76	Macrophage 2 (M)	KIF1B
SCARB1	5.25E-79	0.302293293	0.267	0.139	1.26E-74	Macrophage 2 (M)	SCARB1
RNF13	2.11E-78	0.314364259	0.626	0.485	5.08E-74	Macrophage 2 (M)	RNF13
HERPUD1	2.19E-78	0.401848584	0.681	0.553	5.26E-74	Macrophage 2 (M)	HERPUD1
MAP3K1	8.15E-78	0.323635215	0.37	0.226	1.96E-73	Macrophage 2 (M)	MAP3K1
LAMP2	1.23E-77	0.286768968	0.704	0.565	2.96E-73	Macrophage 2 (M)	LAMP2
TCN2	3.58E-77	0.341254066	0.353	0.215	8.60E-73	Macrophage 2 (M)	TCN2
ABL2	4.35E-77	0.497650933	0.419	0.276	1.05E-72	Macrophage 2 (M)	ABL2
RAC1	6.31E-77	0.25737028	0.876	0.745	1.52E-72	Macrophage 2 (M)	RAC1
ZSWIM6	3.13E-76	0.325916376	0.369	0.229	7.52E-72	Macrophage 2 (M)	ZSWIM6
NFKBIZ1	3.48E-76	0.34701216	0.778	0.648	8.37E-72	Macrophage 2 (M)	NFKBIZ
OGFRL1	5.13E-76	0.363714245	0.405	0.263	1.23E-71	Macrophage 2 (M)	OGFRL1
PLEKHA2	6.06E-76	0.302977445	0.47	0.323	1.46E-71	Macrophage 2 (M)	PLEKHA2
STX7	1.73E-75	0.353363525	0.471	0.334	4.15E-71	Macrophage 2 (M)	STX7
DST	2.13E-75	0.350143765	0.478	0.334	5.12E-71	Macrophage 2 (M)	DST
B4GALT1	4.16E-75	0.356692616	0.503	0.362	1.00E-70	Macrophage 2 (M)	B4GALT1
RAP2A	8.10E-75	0.307465619	0.272	0.146	1.95E-70	Macrophage 2 (M)	RAP2A
USP36	2.62E-74	0.389449349	0.336	0.202	6.30E-70	Macrophage 2 (M)	USP36
OAS3	3.63E-74	0.348602207	0.396	0.256	8.71E-70	Macrophage 2 (M)	OAS3
CD302	4.67E-74	0.338275697	0.417	0.275	1.12E-69	Macrophage 2 (M)	CD302
HEXA	5.16E-74	0.309377155	0.589	0.446	1.24E-69	Macrophage 2 (M)	HEXA
GNAQ	9.05E-74	0.322973067	0.514	0.377	2.17E-69	Macrophage 2 (M)	GNAQ
ISG15	1.77E-73	0.313706727	0.687	0.557	4.26E-69	Macrophage 2 (M)	ISG15
STOM	2.28E-73	0.295497723	0.504	0.364	5.48E-69	Macrophage 2 (M)	STOM
TRPS1	2.73E-73	0.30638069	0.315	0.182	6.57E-69	Macrophage 2 (M)	TRPS1
EPN1	3.41E-73	0.308075936	0.328	0.196	8.20E-69	Macrophage 2 (M)	EPN1
NORAD	3.77E-73	0.338399851	0.4	0.263	9.07E-69	Macrophage 2 (M)	NORAD
SLC12A7	4.26E-73	0.286613144	0.256	0.134	1.02E-68	Macrophage 2 (M)	SLC12A7
PDGFB	8.31E-73	0.360109878	0.259	0.138	2.00E-68	Macrophage 2 (M)	PDGFB
CLTA	8.51E-73	0.309902135	0.738	0.615	2.04E-68	Macrophage 2 (M)	CLTA
PIK3AP1	2.29E-72	0.307676588	0.484	0.342	5.51E-68	Macrophage 2 (M)	PIK3AP1
MIDN	3.86E-72	0.400155426	0.51	0.375	9.27E-68	Macrophage 2 (M)	MIDN
ASAP1	1.05E-71	0.335689987	0.46	0.323	2.53E-67	Macrophage 2 (M)	ASAP1
SERINC1	1.34E-71	0.294902369	0.548	0.409	3.23E-67	Macrophage 2 (M)	SERINC1
IFIT2	1.69E-71	0.39387478	0.389	0.247	4.06E-67	Macrophage 2 (M)	IFIT2
MAT2A	4.95E-71	0.398211578	0.454	0.322	1.19E-66	Macrophage 2 (M)	MAT2A
ASAH11	5.70E-71	0.253216658	0.86	0.701	1.37E-66	Macrophage 2 (M)	ASAH1
ITGAM	2.32E-70	0.337071793	0.44	0.304	5.58E-66	Macrophage 2 (M)	ITGAM
APOL6	3.22E-70	0.299226937	0.56	0.417	7.75E-66	Macrophage 2 (M)	APOL6
LGALS9	4.74E-70	0.283423268	0.68	0.539	1.14E-65	Macrophage 2 (M)	LGALS9
ARHGAP4	5.81E-70	0.298560473	0.402	0.265	1.40E-65	Macrophage 2 (M)	ARHGAP4
SYK	1.22E-69	0.286014322	0.513	0.375	2.93E-65	Macrophage 2 (M)	SYK
SPIN1	2.53E-69	0.288833988	0.266	0.144	6.07E-65	Macrophage 2 (M)	SPIN1
PER1	5.40E-69	0.272405739	0.282	0.155	1.30E-64	Macrophage 2 (M)	PER1
MTRNR2L8	1.86E-68	0.364968563	0.559	0.423	4.47E-64	Macrophage 2 (M)	MTRNR2L8
OSBPL1A	7.83E-68	0.325982578	0.327	0.2	1.88E-63	Macrophage 2 (M)	OSBPL1A
FEZ2	2.35E-66	0.291337077	0.401	0.272	5.65E-62	Macrophage 2 (M)	FEZ2
ATRX	6.89E-66	0.258954908	0.606	0.472	1.66E-61	Macrophage 2 (M)	ATRX
NCKAP1L	2.59E-65	0.268790276	0.643	0.519	6.21E-61	Macrophage 2 (M)	NCKAP1L
DAZAP2	2.37E-64	0.268719627	0.627	0.499	5.69E-60	Macrophage 2 (M)	DAZAP2
DDX3X	3.47E-64	0.322203585	0.766	0.668	8.33E-60	Macrophage 2 (M)	DDX3X
TMEM123	1.24E-63	0.269387828	0.602	0.47	2.97E-59	Macrophage 2 (M)	TMEM123
CANX	2.31E-63	0.261178563	0.735	0.611	5.56E-59	Macrophage 2 (M)	CANX
GALNT1	3.22E-63	0.331606801	0.407	0.282	7.73E-59	Macrophage 2 (M)	GALNT1
C5AR11	5.72E-63	0.286759882	0.736	0.589	1.37E-58	Macrophage 2 (M)	C5AR1
IER5	9.36E-63	0.384618762	0.526	0.399	2.25E-58	Macrophage 2 (M)	IER5
LCP2	1.14E-62	0.298582919	0.615	0.485	2.73E-58	Macrophage 2 (M)	LCP2
PEBP1	1.16E-62	0.260663524	0.633	0.505	2.78E-58	Macrophage 2 (M)	PEBP1
CXCL21	1.25E-62	0.344020335	0.676	0.535	3.00E-58	Macrophage 2 (M)	CXCL2
RNF145	2.47E-62	0.280009593	0.324	0.2	5.93E-58	Macrophage 2 (M)	RNF145
TENT2	2.69E-62	0.267433525	0.286	0.167	6.46E-58	Macrophage 2 (M)	TENT2
CEBPB	3.41E-62	0.267743262	0.76	0.623	8.20E-58	Macrophage 2 (M)	CEBPB
TRA2B	5.22E-62	0.328933925	0.651	0.539	1.26E-57	Macrophage 2 (M)	TRA2B
SCAMP2	5.95E-62	0.287298389	0.521	0.398	1.43E-57	Macrophage 2 (M)	SCAMP2
SGPL1	7.20E-62	0.293506852	0.3	0.181	1.73E-57	Macrophage 2 (M)	SGPL1
GLMP	7.77E-62	0.337594802	0.37	0.249	1.87E-57	Macrophage 2 (M)	GLMP
NEU1	1.03E-61	0.390601499	0.408	0.289	2.47E-57	Macrophage 2 (M)	NEU1
RRBP1	1.11E-61	0.272461479	0.576	0.451	2.66E-57	Macrophage 2 (M)	RRBP1
DCTN4	1.57E-61	0.306068245	0.327	0.204	3.79E-57	Macrophage 2 (M)	DCTN4
LYN	2.69E-61	0.262965724	0.643	0.512	6.46E-57	Macrophage 2 (M)	LYN
ATF6	3.29E-61	0.296370952	0.391	0.266	7.92E-57	Macrophage 2 (M)	ATF6
ATP6V0A1	8.89E-61	0.332732423	0.454	0.334	2.14E-56	Macrophage 2 (M)	ATP6V0A1
PDIA4	8.49E-60	0.343616864	0.455	0.335	2.04E-55	Macrophage 2 (M)	PDIA4
DTX3L	1.39E-59	0.273974245	0.38	0.254	3.33E-55	Macrophage 2 (M)	DTX3L
RERE	3.39E-59	0.254300493	0.282	0.165	8.15E-55	Macrophage 2 (M)	RERE
PTPRJ	4.63E-59	0.291654827	0.386	0.264	1.11E-54	Macrophage 2 (M)	PTPRJ
CELF1	5.14E-59	0.309651727	0.492	0.372	1.23E-54	Macrophage 2 (M)	CELF1
ARID3A	1.24E-58	0.304426889	0.267	0.156	2.98E-54	Macrophage 2 (M)	ARID3A
XBP1	2.80E-58	0.315025478	0.573	0.457	6.72E-54	Macrophage 2 (M)	XBP1
CLIC2	4.17E-58	0.274426194	0.257	0.148	1.00E-53	Macrophage 2 (M)	CLIC2
SAMD9L	3.15E-57	0.291250498	0.564	0.447	7.58E-53	Macrophage 2 (M)	SAMD9L
TAOK1	4.79E-57	0.278837672	0.433	0.309	1.15E-52	Macrophage 2 (M)	TAOK1
HSP90B1	5.12E-56	0.280383119	0.834	0.724	1.23E-51	Macrophage 2 (M)	HSP90B1
RGS2	5.72E-56	0.320881064	0.649	0.52	1.38E-51	Macrophage 2 (M)	RGS2
SMAP2	6.37E-56	0.253514718	0.553	0.428	1.53E-51	Macrophage 2 (M)	SMAP2
NUFIP2	9.33E-56	0.278040543	0.479	0.363	2.24E-51	Macrophage 2 (M)	NUFIP2
SLC1A3	9.34E-56	0.302558623	0.471	0.352	2.24E-51	Macrophage 2 (M)	SLC1A3
PHACTR1	1.77E-55	0.304374816	0.434	0.301	4.25E-51	Macrophage 2 (M)	PHACTR1
TRPM2	1.99E-55	0.254208306	0.27	0.16	4.78E-51	Macrophage 2 (M)	TRPM2
FLI1	2.53E-55	0.258173171	0.288	0.175	6.08E-51	Macrophage 2 (M)	FLI1
C20orf194	4.21E-55	0.272448163	0.257	0.149	1.01E-50	Macrophage 2 (M)	C20orf194
CHID1	4.46E-55	0.281456258	0.313	0.2	1.07E-50	Macrophage 2 (M)	CHID1
DNAJC13	7.49E-55	0.280131599	0.303	0.192	1.80E-50	Macrophage 2 (M)	DNAJC13
P4HA1	8.02E-55	0.265856723	0.438	0.315	1.93E-50	Macrophage 2 (M)	P4HA1
HES11	6.04E-54	0.37655491	0.54	0.412	1.45E-49	Macrophage 2 (M)	HES1
SEMA4A	1.80E-53	0.358579021	0.4	0.285	4.31E-49	Macrophage 2 (M)	SEMA4A
RANBP2	2.45E-53	0.299814487	0.517	0.399	5.88E-49	Macrophage 2 (M)	RANBP2
SETX	3.13E-53	0.258295749	0.489	0.366	7.53E-49	Macrophage 2 (M)	SETX
FEM1B	9.57E-53	0.254893707	0.266	0.16	2.30E-48	Macrophage 2 (M)	FEM1B
ADCY7	1.25E-52	0.275336236	0.355	0.242	3.00E-48	Macrophage 2 (M)	ADCY7
PUM2	1.76E-52	0.250452677	0.298	0.187	4.23E-48	Macrophage 2 (M)	PUM2
BAZ2B	1.88E-52	0.261661705	0.443	0.323	4.52E-48	Macrophage 2 (M)	BAZ2B
MLXIP	4.15E-52	0.260426343	0.296	0.187	9.98E-48	Macrophage 2 (M)	MLXIP
HIF1A	5.79E-52	0.255181966	0.613	0.489	1.39E-47	Macrophage 2 (M)	HIF1A
TRIB1	7.83E-52	0.303699642	0.32	0.208	1.88E-47	Macrophage 2 (M)	TRIB1
CCDC50	3.12E-51	0.25913237	0.294	0.186	7.50E-47	Macrophage 2 (M)	CCDC50
ETNK1	7.04E-51	0.252453758	0.343	0.23	1.69E-46	Macrophage 2 (M)	ETNK1
SNX18	9.07E-51	0.255348081	0.309	0.199	2.18E-46	Macrophage 2 (M)	SNX18
RAB5C	1.21E-50	0.274550032	0.646	0.551	2.91E-46	Macrophage 2 (M)	RAB5C
PECAM1	1.24E-50	0.261238341	0.505	0.394	2.99E-46	Macrophage 2 (M)	PECAM1
EFCAB14	1.74E-50	0.262218903	0.375	0.261	4.18E-46	Macrophage 2 (M)	EFCAB14
IRF2BP2	6.29E-50	0.25231946	0.505	0.394	1.51E-45	Macrophage 2 (M)	IRF2BP2
METTL7A	2.15E-49	0.283678807	0.325	0.215	5.16E-45	Macrophage 2 (M)	METTL7A
PHACTR2	2.36E-49	0.254763365	0.354	0.244	5.66E-45	Macrophage 2 (M)	PHACTR2
PTBP3	2.39E-48	0.258260133	0.525	0.415	5.73E-44	Macrophage 2 (M)	PTBP3
SERPINB6	3.54E-48	0.279598424	0.502	0.398	8.51E-44	Macrophage 2 (M)	SERPINB6
CXCL3	4.53E-48	0.410010077	0.506	0.383	1.09E-43	Macrophage 2 (M)	CXCL3
NR4A3	3.84E-47	0.378909225	0.488	0.379	9.22E-43	Macrophage 2 (M)	NR4A3
AC020916.1	5.21E-47	0.303973063	0.313	0.203	1.25E-42	Macrophage 2 (M)	AC020916.1
KLF7	9.57E-47	0.282489455	0.277	0.176	2.30E-42	Macrophage 2 (M)	KLF7
WDR26	1.95E-46	0.262463508	0.34	0.234	4.68E-42	Macrophage 2 (M)	WDR26
ATP2A2	5.44E-46	0.281431961	0.407	0.3	1.31E-41	Macrophage 2 (M)	ATP2A2
DMXL2	9.79E-46	0.260729715	0.54	0.433	2.35E-41	Macrophage 2 (M)	DMXL2
PLEKHO2	1.04E-45	0.255313891	0.396	0.287	2.50E-41	Macrophage 2 (M)	PLEKHO2
YBX3	1.24E-45	0.324677835	0.64	0.549	2.98E-41	Macrophage 2 (M)	YBX3
NAGA	1.31E-45	0.269705844	0.4	0.294	3.15E-41	Macrophage 2 (M)	NAGA
PHACTR4	2.52E-45	0.25549961	0.367	0.262	6.06E-41	Macrophage 2 (M)	PHACTR4
IFRD1	3.16E-45	0.336923075	0.437	0.327	7.59E-41	Macrophage 2 (M)	IFRD1
PPP1R15B	4.30E-45	0.270935288	0.524	0.417	1.03E-40	Macrophage 2 (M)	PPP1R15B
KDM6B	4.69E-45	0.277625161	0.64	0.534	1.13E-40	Macrophage 2 (M)	KDM6B
RAB20	9.18E-45	0.265530196	0.401	0.296	2.21E-40	Macrophage 2 (M)	RAB20
ALDH1A11	1.73E-44	0.273691715	0.497	0.384	4.16E-40	Macrophage 2 (M)	ALDH1A1
PICALM	5.42E-44	0.262874383	0.463	0.358	1.30E-39	Macrophage 2 (M)	PICALM
ARL5B	2.42E-42	0.30503034	0.36	0.251	5.83E-38	Macrophage 2 (M)	ARL5B
PLXNB2	1.24E-41	0.265304087	0.416	0.314	2.99E-37	Macrophage 2 (M)	PLXNB2
FGD2	2.09E-41	0.258262829	0.281	0.187	5.02E-37	Macrophage 2 (M)	FGD2
CTNND1	1.54E-40	0.25965996	0.349	0.252	3.71E-36	Macrophage 2 (M)	CTNND1
UGCG	1.55E-40	0.255885579	0.378	0.278	3.73E-36	Macrophage 2 (M)	UGCG
RNF144B	1.67E-40	0.251802523	0.312	0.215	4.01E-36	Macrophage 2 (M)	RNF144B
FAM53C	1.84E-39	0.276608937	0.26	0.168	4.42E-35	Macrophage 2 (M)	FAM53C
LMNA	1.31E-38	0.306447771	0.643	0.531	3.14E-34	Macrophage 2 (M)	LMNA
CYB5D1	2.09E-38	0.28373218	0.283	0.187	5.01E-34	Macrophage 2 (M)	CYB5D1
SECTM1	2.49E-37	0.252363781	0.306	0.215	5.98E-33	Macrophage 2 (M)	SECTM1
AHR	1.05E-36	0.263126297	0.377	0.281	2.52E-32	Macrophage 2 (M)	AHR
HSPA5	3.75E-35	0.400298236	0.695	0.615	9.02E-31	Macrophage 2 (M)	HSPA5
AC245014.3	2.00E-33	0.283203301	0.285	0.196	4.81E-29	Macrophage 2 (M)	AC245014.3
KLF10	2.06E-33	0.250880711	0.47	0.382	4.96E-29	Macrophage 2 (M)	KLF10
CCL18	1.28E-30	0.668185038	0.264	0.181	3.09E-26	Macrophage 2 (M)	CCL18
NUPR1	2.04E-20	0.312322434	0.489	0.41	4.90E-16	Macrophage 2 (M)	NUPR1
CD36	2.92E-16	0.684986983	0.38	0.338	7.03E-12	Macrophage 2 (M)	CD36
FABP5	0	1.757771031	0.939	0.493	0	Macrophage 3 (M)	FABP5
SPP11	0	1.637109568	0.931	0.405	0	Macrophage 3 (M)	SPP1
LPL	0	1.318886887	0.565	0.059	0	Macrophage 3 (M)	LPL
CSTB	0	1.138435127	0.993	0.728	0	Macrophage 3 (M)	CSTB
SDC2	0	0.917217151	0.65	0.134	0	Macrophage 3 (M)	SDC2
CTSD1	0	0.894759026	0.999	0.844	0	Macrophage 3 (M)	CTSD
ANXA21	0	0.797138746	0.978	0.755	0	Macrophage 3 (M)	ANXA2
VIM1	0	0.775440102	1	0.906	0	Macrophage 3 (M)	VIM
EMP1	0	0.739716175	0.538	0.083	0	Macrophage 3 (M)	EMP1
MGST1	0	0.601912586	0.461	0.089	0	Macrophage 3 (M)	MGST1
TM4SF19	0	0.599373754	0.332	0.012	0	Macrophage 3 (M)	TM4SF19
LGALS1	3.14E-303	0.793392704	0.992	0.799	7.54E-299	Macrophage 3 (M)	LGALS1
CTSB	2.37E-302	0.875901713	0.996	0.807	5.69E-298	Macrophage 3 (M)	CTSB
CD361	1.50E-296	1.018147964	0.795	0.311	3.61E-292	Macrophage 3 (M)	CD36
S100A111	1.23E-289	0.653948499	0.995	0.895	2.95E-285	Macrophage 3 (M)	S100A11
CD109	2.77E-280	0.49908549	0.402	0.07	6.66E-276	Macrophage 3 (M)	CD109
GCHFR1	8.76E-277	0.964068285	0.842	0.365	2.10E-272	Macrophage 3 (M)	GCHFR
LGALS31	1.95E-253	0.806564108	0.986	0.714	4.70E-249	Macrophage 3 (M)	LGALS3
S100A101	6.59E-253	0.733668075	0.989	0.749	1.58E-248	Macrophage 3 (M)	S100A10
MMP19	1.34E-250	0.678002408	0.54	0.139	3.22E-246	Macrophage 3 (M)	MMP19
ALCAM	1.31E-247	0.863681303	0.773	0.335	3.14E-243	Macrophage 3 (M)	ALCAM
SLC11A11	2.59E-243	0.679148429	0.822	0.345	6.23E-239	Macrophage 3 (M)	SLC11A1
RAB7B	2.39E-234	0.454447017	0.417	0.093	5.75E-230	Macrophage 3 (M)	RAB7B
CD91	6.45E-232	0.827089118	0.867	0.453	1.55E-227	Macrophage 3 (M)	CD9
HSD3B7	1.41E-229	0.498198346	0.491	0.132	3.38E-225	Macrophage 3 (M)	HSD3B7
PHLDA1	4.34E-227	0.66853432	0.568	0.16	1.04E-222	Macrophage 3 (M)	PHLDA1
AQP91	2.57E-226	0.566086177	0.673	0.235	6.19E-222	Macrophage 3 (M)	AQP9
PLIN21	2.72E-226	0.924820681	0.921	0.53	6.55E-222	Macrophage 3 (M)	PLIN2
SEMA3C	7.44E-226	0.425247291	0.368	0.075	1.79E-221	Macrophage 3 (M)	SEMA3C
CTSL1	3.92E-222	0.859310739	0.978	0.706	9.41E-218	Macrophage 3 (M)	CTSL
FTL1	1.46E-219	0.72146978	1	0.954	3.50E-215	Macrophage 3 (M)	FTL
TUBA1C	4.45E-217	0.678056543	0.82	0.39	1.07E-212	Macrophage 3 (M)	TUBA1C
PLA2G7	1.37E-214	0.763448078	0.68	0.268	3.29E-210	Macrophage 3 (M)	PLA2G7
PDXK	3.22E-211	0.683838429	0.84	0.452	7.74E-207	Macrophage 3 (M)	PDXK
S100A61	7.76E-210	0.633064876	0.992	0.781	1.87E-205	Macrophage 3 (M)	S100A6
TREM21	4.29E-209	0.729677258	0.855	0.458	1.03E-204	Macrophage 3 (M)	TREM2
SMIM251	2.80E-208	0.573796604	0.72	0.288	6.74E-204	Macrophage 3 (M)	SMIM25
FLNA1	1.29E-204	0.688309914	0.873	0.467	3.11E-200	Macrophage 3 (M)	FLNA
RGCC	3.25E-204	0.807528135	0.73	0.298	7.80E-200	Macrophage 3 (M)	RGCC
LIMS1	6.30E-196	0.655632053	0.916	0.567	1.52E-191	Macrophage 3 (M)	LIMS1
NRIP3	2.27E-189	0.302123846	0.257	0.042	5.46E-185	Macrophage 3 (M)	NRIP3
NCEH1	1.15E-184	0.59753706	0.681	0.292	2.77E-180	Macrophage 3 (M)	NCEH1
CLEC5A	8.25E-184	0.383886491	0.324	0.067	1.98E-179	Macrophage 3 (M)	CLEC5A
FAM20C	3.34E-182	0.524923903	0.57	0.204	8.02E-178	Macrophage 3 (M)	FAM20C
HTRA1	2.74E-181	0.702827543	0.505	0.157	6.59E-177	Macrophage 3 (M)	HTRA1
HS3ST1	2.53E-179	0.447722635	0.415	0.11	6.09E-175	Macrophage 3 (M)	HS3ST1
GSTO11	2.72E-179	0.603092168	0.916	0.593	6.54E-175	Macrophage 3 (M)	GSTO1
RMDN3	1.10E-178	0.599394045	0.641	0.263	2.65E-174	Macrophage 3 (M)	RMDN3
ATP6V1F1	5.30E-178	0.553662149	0.952	0.662	1.27E-173	Macrophage 3 (M)	ATP6V1F
SH3BGRL3	1.30E-175	0.54591525	0.979	0.858	3.14E-171	Macrophage 3 (M)	SH3BGRL3
ST14	2.82E-175	0.4597228	0.589	0.213	6.77E-171	Macrophage 3 (M)	ST14
PPP1R14B	8.63E-175	0.448996152	0.625	0.236	2.07E-170	Macrophage 3 (M)	PPP1R14B
LSP1	1.01E-172	0.608551645	0.88	0.511	2.44E-168	Macrophage 3 (M)	LSP1
LAPTM5	3.53E-171	0.488943207	0.987	0.828	8.49E-167	Macrophage 3 (M)	LAPTM5
IRAK1	4.55E-169	0.522182546	0.654	0.271	1.09E-164	Macrophage 3 (M)	IRAK1
MSR1	1.39E-168	0.651461058	0.875	0.542	3.34E-164	Macrophage 3 (M)	MSR1
CD63	2.45E-168	0.499882535	0.987	0.886	5.89E-164	Macrophage 3 (M)	CD63
MGST3	2.69E-168	0.592380957	0.877	0.551	6.47E-164	Macrophage 3 (M)	MGST3
BCAP31	8.91E-166	0.571827427	0.832	0.481	2.14E-161	Macrophage 3 (M)	BCAP31
GSN	1.24E-165	0.831521231	0.82	0.528	2.97E-161	Macrophage 3 (M)	GSN
GPNMB1	1.33E-165	0.575618217	0.972	0.603	3.19E-161	Macrophage 3 (M)	GPNMB
ENO1	2.43E-164	0.526416723	0.952	0.739	5.84E-160	Macrophage 3 (M)	ENO1
SLC43A3	3.88E-161	0.502468006	0.615	0.25	9.32E-157	Macrophage 3 (M)	SLC43A3
ACTN1	1.07E-159	0.49229623	0.67	0.291	2.58E-155	Macrophage 3 (M)	ACTN1
LHFPL2	1.93E-159	0.567204957	0.788	0.395	4.65E-155	Macrophage 3 (M)	LHFPL2
SCARB2	7.43E-159	0.564111391	0.85	0.485	1.78E-154	Macrophage 3 (M)	SCARB2
MYL6	1.40E-157	0.456828931	0.984	0.903	3.36E-153	Macrophage 3 (M)	MYL6
CCDC88A	1.76E-155	0.582731472	0.908	0.593	4.24E-151	Macrophage 3 (M)	CCDC88A
PKM	4.81E-155	0.527621404	0.942	0.659	1.16E-150	Macrophage 3 (M)	PKM
LIPA1	9.42E-153	0.631476173	0.873	0.527	2.26E-148	Macrophage 3 (M)	LIPA
FNIP2	4.01E-152	0.547564486	0.673	0.298	9.63E-148	Macrophage 3 (M)	FNIP2
GLIPR2	1.48E-151	0.456155841	0.75	0.364	3.55E-147	Macrophage 3 (M)	GLIPR2
PPARG	3.44E-148	0.330536515	0.407	0.122	8.26E-144	Macrophage 3 (M)	PPARG
ANXA51	6.68E-148	0.491498555	0.959	0.743	1.61E-143	Macrophage 3 (M)	ANXA5
LGMN1	1.33E-146	0.566826745	0.952	0.618	3.20E-142	Macrophage 3 (M)	LGMN
IL1RN1	8.62E-146	0.92438327	0.627	0.277	2.07E-141	Macrophage 3 (M)	IL1RN
MFSD12	1.81E-143	0.514208182	0.662	0.312	4.36E-139	Macrophage 3 (M)	MFSD12
APOC11	1.96E-143	0.633735266	0.966	0.647	4.72E-139	Macrophage 3 (M)	APOC1
TGFBI	6.76E-143	0.635519695	0.83	0.478	1.62E-138	Macrophage 3 (M)	TGFBI
SDS1	7.67E-143	0.614378095	0.566	0.232	1.84E-138	Macrophage 3 (M)	SDS
SLC16A10	6.57E-142	0.357265242	0.276	0.061	1.58E-137	Macrophage 3 (M)	SLC16A10
ATP13A3	9.45E-142	0.489077567	0.652	0.285	2.27E-137	Macrophage 3 (M)	ATP13A3
PDLIM7	8.05E-141	0.368188453	0.422	0.134	1.93E-136	Macrophage 3 (M)	PDLIM7
MGLL	9.98E-140	0.542335508	0.707	0.347	2.40E-135	Macrophage 3 (M)	MGLL
UBASH3B	3.02E-139	0.270132969	0.366	0.103	7.27E-135	Macrophage 3 (M)	UBASH3B
ADAM8	9.69E-139	0.433137857	0.421	0.133	2.33E-134	Macrophage 3 (M)	ADAM8
KCNN4	2.05E-137	0.311650131	0.301	0.075	4.93E-133	Macrophage 3 (M)	KCNN4
DBI1	2.77E-136	0.563084831	0.921	0.678	6.65E-132	Macrophage 3 (M)	DBI
FAM129B	1.51E-135	0.298018176	0.337	0.092	3.62E-131	Macrophage 3 (M)	FAM129B
HM13	9.00E-135	0.482759577	0.768	0.414	2.16E-130	Macrophage 3 (M)	HM13
LMNA1	7.81E-133	0.519521039	0.89	0.528	1.88E-128	Macrophage 3 (M)	LMNA
TPM4	4.19E-132	0.521742524	0.894	0.595	1.01E-127	Macrophage 3 (M)	TPM4
CAPG1	7.47E-132	0.498915393	0.963	0.693	1.80E-127	Macrophage 3 (M)	CAPG
GALM	5.69E-131	0.402503667	0.511	0.198	1.37E-126	Macrophage 3 (M)	GALM
ME2	1.87E-130	0.564828328	0.708	0.369	4.51E-126	Macrophage 3 (M)	ME2
CD681	3.38E-128	0.4643798	0.972	0.735	8.12E-124	Macrophage 3 (M)	CD68
MYADM	2.39E-127	0.35386759	0.6	0.248	5.73E-123	Macrophage 3 (M)	MYADM
TUBB6	2.72E-127	0.319141946	0.408	0.136	6.53E-123	Macrophage 3 (M)	TUBB6
CORO1C	2.10E-126	0.440520984	0.715	0.367	5.06E-122	Macrophage 3 (M)	CORO1C
CALR	1.30E-125	0.524146179	0.948	0.751	3.13E-121	Macrophage 3 (M)	CALR
CD276	1.94E-124	0.336124847	0.382	0.121	4.66E-120	Macrophage 3 (M)	CD276
BCAT11	3.50E-123	0.364659651	0.592	0.25	8.42E-119	Macrophage 3 (M)	BCAT1
UPP1	2.42E-121	0.448599574	0.715	0.357	5.82E-117	Macrophage 3 (M)	UPP1
ACTB	3.63E-121	0.454553834	0.996	0.983	8.72E-117	Macrophage 3 (M)	ACTB
VAT1	3.21E-119	0.416872967	0.657	0.313	7.72E-115	Macrophage 3 (M)	VAT1
CALU	4.00E-119	0.421762222	0.66	0.316	9.62E-115	Macrophage 3 (M)	CALU
PAPSS1	4.41E-119	0.330666493	0.536	0.218	1.06E-114	Macrophage 3 (M)	PAPSS1
ALOX5AP	1.95E-118	0.49834898	0.569	0.242	4.68E-114	Macrophage 3 (M)	ALOX5AP
APLP21	5.89E-115	0.450677293	0.937	0.686	1.42E-110	Macrophage 3 (M)	APLP2
YBX1	9.43E-115	0.413537681	0.961	0.843	2.27E-110	Macrophage 3 (M)	YBX1
TDP2	9.84E-114	0.319206279	0.449	0.166	2.37E-109	Macrophage 3 (M)	TDP2
LAMP11	4.16E-113	0.447888467	0.839	0.522	9.99E-109	Macrophage 3 (M)	LAMP1
ATP6V0D1	1.99E-111	0.461768065	0.808	0.509	4.78E-107	Macrophage 3 (M)	ATP6V0D1
GAPDH	3.58E-111	0.369865481	0.987	0.901	8.60E-107	Macrophage 3 (M)	GAPDH
NRP11	2.17E-108	0.255889504	0.653	0.291	5.21E-104	Macrophage 3 (M)	NRP1
CYP27A11	1.30E-106	0.446892206	0.607	0.282	3.12E-102	Macrophage 3 (M)	CYP27A1
ITGB1	6.02E-106	0.445638524	0.89	0.631	1.45E-101	Macrophage 3 (M)	ITGB1
TOMM40	2.29E-105	0.323548547	0.404	0.15	5.51E-101	Macrophage 3 (M)	TOMM40
NOP10	3.28E-105	0.419142185	0.829	0.524	7.88E-101	Macrophage 3 (M)	NOP10
RALA	1.70E-104	0.442826173	0.688	0.352	4.08E-100	Macrophage 3 (M)	RALA
SOAT1	3.63E-104	0.424137256	0.645	0.33	8.73E-100	Macrophage 3 (M)	SOAT1
PGAM1	1.18E-103	0.353381166	0.75	0.42	2.84E-99	Macrophage 3 (M)	PGAM1
TCEAL9	1.28E-103	0.303732837	0.403	0.145	3.08E-99	Macrophage 3 (M)	TCEAL9
NCLN	2.19E-103	0.277518911	0.375	0.132	5.26E-99	Macrophage 3 (M)	NCLN
ARHGAP10	6.82E-103	0.278170602	0.468	0.186	1.64E-98	Macrophage 3 (M)	ARHGAP10
ATP6V0B	1.03E-102	0.410335745	0.914	0.68	2.47E-98	Macrophage 3 (M)	ATP6V0B
HK2	1.48E-102	0.351244838	0.358	0.123	3.55E-98	Macrophage 3 (M)	HK2
P4HB	9.68E-102	0.415441454	0.866	0.591	2.33E-97	Macrophage 3 (M)	P4HB
NME1	1.06E-100	0.282289374	0.429	0.165	2.54E-96	Macrophage 3 (M)	NME1
BRI31	2.50E-100	0.400491364	0.942	0.697	6.00E-96	Macrophage 3 (M)	BRI3
CCT5	3.06E-99	0.393918589	0.654	0.349	7.36E-95	Macrophage 3 (M)	CCT5
CAMK1	1.80E-98	0.300654668	0.423	0.164	4.32E-94	Macrophage 3 (M)	CAMK1
SPHK1	2.76E-98	0.251992172	0.316	0.102	6.64E-94	Macrophage 3 (M)	SPHK1
CFL1	3.49E-97	0.322664667	0.972	0.901	8.40E-93	Macrophage 3 (M)	CFL1
CD82	8.09E-96	0.287618889	0.494	0.209	1.94E-91	Macrophage 3 (M)	CD82
FAH	1.88E-95	0.26089213	0.32	0.106	4.52E-91	Macrophage 3 (M)	FAH
TUBB	1.01E-94	0.408220629	0.871	0.62	2.43E-90	Macrophage 3 (M)	TUBB
HAVCR2	4.82E-94	0.375573799	0.706	0.391	1.16E-89	Macrophage 3 (M)	HAVCR2
PLEC	5.39E-94	0.326611156	0.601	0.286	1.30E-89	Macrophage 3 (M)	PLEC
SCD	5.73E-94	0.458903458	0.491	0.219	1.38E-89	Macrophage 3 (M)	SCD
CXXC5	7.10E-94	0.288763091	0.526	0.235	1.71E-89	Macrophage 3 (M)	CXXC5
ITGAX	1.00E-93	0.345426993	0.732	0.402	2.41E-89	Macrophage 3 (M)	ITGAX
MCRIP2	4.01E-93	0.287353852	0.473	0.203	9.64E-89	Macrophage 3 (M)	MCRIP2
PLAUR1	8.00E-92	0.397235596	0.952	0.684	1.92E-87	Macrophage 3 (M)	PLAUR
GSDME	1.31E-91	0.251392314	0.311	0.103	3.16E-87	Macrophage 3 (M)	GSDME
TCIRG1	1.34E-91	0.369393685	0.706	0.391	3.21E-87	Macrophage 3 (M)	TCIRG1
IGF2R	1.89E-90	0.312524349	0.572	0.274	4.54E-86	Macrophage 3 (M)	IGF2R
ELOC	1.39E-89	0.344799423	0.634	0.334	3.35E-85	Macrophage 3 (M)	ELOC
PSMA7	1.77E-89	0.376980633	0.921	0.715	4.25E-85	Macrophage 3 (M)	PSMA7
AP2S1	3.64E-89	0.384411303	0.88	0.624	8.74E-85	Macrophage 3 (M)	AP2S1
GPRIN3	1.04E-88	0.29227676	0.517	0.235	2.51E-84	Macrophage 3 (M)	GPRIN3
RPN1	1.69E-88	0.30688797	0.664	0.343	4.06E-84	Macrophage 3 (M)	RPN1
ACTG1	1.63E-87	0.339271139	0.971	0.93	3.93E-83	Macrophage 3 (M)	ACTG1
NDUFB9	3.68E-87	0.353971844	0.68	0.38	8.84E-83	Macrophage 3 (M)	NDUFB9
TNS31	6.37E-87	0.35949851	0.678	0.36	1.53E-82	Macrophage 3 (M)	TNS3
MMP9	2.74E-86	1.236808912	0.372	0.154	6.58E-82	Macrophage 3 (M)	MMP9
MYO1E	2.25E-85	0.305895981	0.469	0.211	5.40E-81	Macrophage 3 (M)	MYO1E
CPM1	7.03E-85	0.454800966	0.718	0.426	1.69E-80	Macrophage 3 (M)	CPM
TSPO1	1.49E-84	0.358456133	0.93	0.706	3.58E-80	Macrophage 3 (M)	TSPO
PGK1	1.73E-84	0.379827983	0.873	0.608	4.15E-80	Macrophage 3 (M)	PGK1
SDSL	3.13E-84	0.291616019	0.467	0.208	7.52E-80	Macrophage 3 (M)	SDSL
ACOT13	8.93E-84	0.266597095	0.443	0.19	2.15E-79	Macrophage 3 (M)	ACOT13
CD151	1.91E-83	0.30333727	0.601	0.306	4.60E-79	Macrophage 3 (M)	CD151
P2RX4	1.48E-82	0.301564227	0.598	0.306	3.56E-78	Macrophage 3 (M)	P2RX4
ADAM91	2.48E-82	0.270830033	0.589	0.289	5.96E-78	Macrophage 3 (M)	ADAM9
ACP51	1.92E-81	0.416029052	0.822	0.504	4.63E-77	Macrophage 3 (M)	ACP5
SLC39A8	1.18E-80	0.313552336	0.374	0.149	2.85E-76	Macrophage 3 (M)	SLC39A8
HCFC1R1	3.42E-80	0.260196835	0.397	0.165	8.22E-76	Macrophage 3 (M)	HCFC1R1
YWHAG	6.24E-80	0.286414913	0.607	0.312	1.50E-75	Macrophage 3 (M)	YWHAG
HPCAL1	1.91E-79	0.25688438	0.442	0.192	4.58E-75	Macrophage 3 (M)	HPCAL1
ENG	5.28E-79	0.302874469	0.636	0.338	1.27E-74	Macrophage 3 (M)	ENG
MRAS	8.43E-79	0.281005042	0.376	0.156	2.03E-74	Macrophage 3 (M)	MRAS
FBP11	1.03E-78	0.427702606	0.692	0.379	2.47E-74	Macrophage 3 (M)	FBP1
NEK6	5.12E-78	0.29517332	0.503	0.241	1.23E-73	Macrophage 3 (M)	NEK6
ASPH	1.06E-77	0.29188814	0.469	0.213	2.54E-73	Macrophage 3 (M)	ASPH
FNDC3B	7.97E-77	0.347638962	0.656	0.366	1.92E-72	Macrophage 3 (M)	FNDC3B
HMGA1	1.27E-76	0.312899712	0.581	0.304	3.05E-72	Macrophage 3 (M)	HMGA1
SLC7A81	1.86E-76	0.266790889	0.361	0.142	4.47E-72	Macrophage 3 (M)	SLC7A8
HSP90B11	1.72E-75	0.348408872	0.921	0.734	4.13E-71	Macrophage 3 (M)	HSP90B1
TNS1	2.55E-75	0.27087949	0.379	0.156	6.14E-71	Macrophage 3 (M)	TNS1
TXNDC17	1.19E-74	0.276951554	0.621	0.334	2.87E-70	Macrophage 3 (M)	TXNDC17
PLPP3	1.28E-74	0.284945768	0.289	0.105	3.07E-70	Macrophage 3 (M)	PLPP3
APOE1	2.69E-74	0.329488341	0.972	0.707	6.46E-70	Macrophage 3 (M)	APOE
CLIC1	3.28E-74	0.293166187	0.949	0.775	7.87E-70	Macrophage 3 (M)	CLIC1
PDIA6	6.51E-74	0.344439604	0.821	0.556	1.56E-69	Macrophage 3 (M)	PDIA6
LDHA	1.68E-73	0.304120317	0.881	0.619	4.04E-69	Macrophage 3 (M)	LDHA
RAB1A	2.34E-73	0.294810111	0.697	0.403	5.63E-69	Macrophage 3 (M)	RAB1A
CALM1	4.27E-73	0.33403776	0.965	0.827	1.03E-68	Macrophage 3 (M)	CALM1
MLEC	6.10E-73	0.269841672	0.608	0.322	1.46E-68	Macrophage 3 (M)	MLEC
ITGB51	6.23E-73	0.304925615	0.385	0.164	1.50E-68	Macrophage 3 (M)	ITGB5
NPC21	4.98E-72	0.314917555	0.978	0.808	1.20E-67	Macrophage 3 (M)	NPC2
H2AFY	6.30E-72	0.359297832	0.9	0.642	1.52E-67	Macrophage 3 (M)	H2AFY
ANXA4	6.74E-72	0.294096788	0.627	0.344	1.62E-67	Macrophage 3 (M)	ANXA4
HAMP	1.01E-71	0.36294208	0.531	0.266	2.44E-67	Macrophage 3 (M)	HAMP
HEXB	1.59E-71	0.353886818	0.821	0.527	3.82E-67	Macrophage 3 (M)	HEXB
PFN1	3.08E-71	0.283957688	0.973	0.887	7.40E-67	Macrophage 3 (M)	PFN1
CCL21	4.04E-71	0.593353736	0.403	0.177	9.72E-67	Macrophage 3 (M)	CCL2
ATP5MC3	4.67E-71	0.366299277	0.82	0.565	1.12E-66	Macrophage 3 (M)	ATP5MC3
PARVB	1.27E-70	0.251691345	0.408	0.182	3.05E-66	Macrophage 3 (M)	PARVB
ANPEP1	2.16E-70	0.367977891	0.578	0.31	5.20E-66	Macrophage 3 (M)	ANPEP
TPM3	2.27E-70	0.313675991	0.951	0.778	5.45E-66	Macrophage 3 (M)	TPM3
HSPA51	4.64E-70	0.351143109	0.843	0.616	1.11E-65	Macrophage 3 (M)	HSPA5
SDF2L1	8.60E-70	0.284447485	0.556	0.288	2.07E-65	Macrophage 3 (M)	SDF2L1
NCF21	1.09E-69	0.326646075	0.799	0.503	2.61E-65	Macrophage 3 (M)	NCF2
MPP1	1.87E-69	0.288575941	0.737	0.435	4.48E-65	Macrophage 3 (M)	MPP1
KDELR2	1.97E-69	0.277542339	0.636	0.356	4.73E-65	Macrophage 3 (M)	KDELR2
VDAC1	3.81E-69	0.307634755	0.762	0.487	9.16E-65	Macrophage 3 (M)	VDAC1
SIRPA1	7.04E-69	0.2924654	0.714	0.415	1.69E-64	Macrophage 3 (M)	SIRPA
VKORC1	1.23E-68	0.257940681	0.557	0.292	2.96E-64	Macrophage 3 (M)	VKORC1
CYSTM1	2.10E-68	0.250225532	0.469	0.226	5.04E-64	Macrophage 3 (M)	CYSTM1
DSTN	3.71E-68	0.271008867	0.767	0.47	8.91E-64	Macrophage 3 (M)	DSTN
KIAA0930	4.01E-68	0.290011808	0.58	0.313	9.63E-64	Macrophage 3 (M)	KIAA0930
C5AR12	1.00E-67	0.299532328	0.884	0.599	2.41E-63	Macrophage 3 (M)	C5AR1
CCL181	1.17E-67	0.439095913	0.406	0.183	2.82E-63	Macrophage 3 (M)	CCL18
EML4	6.16E-67	0.257473751	0.652	0.367	1.48E-62	Macrophage 3 (M)	EML4
RAB131	1.25E-66	0.324091841	0.604	0.335	3.00E-62	Macrophage 3 (M)	RAB13
EIF4G1	1.79E-66	0.282822687	0.623	0.356	4.29E-62	Macrophage 3 (M)	EIF4G1
SLC16A3	2.07E-66	0.295325606	0.725	0.431	4.98E-62	Macrophage 3 (M)	SLC16A3
FDX1	2.19E-66	0.298588854	0.467	0.229	5.27E-62	Macrophage 3 (M)	FDX1
CANX1	1.06E-65	0.29698256	0.87	0.619	2.55E-61	Macrophage 3 (M)	CANX
SEC61G	1.20E-65	0.293578213	0.721	0.443	2.88E-61	Macrophage 3 (M)	SEC61G
ERO1A	5.77E-65	0.264049005	0.486	0.242	1.39E-60	Macrophage 3 (M)	ERO1A
MARCO1	2.59E-64	0.291790543	0.499	0.247	6.22E-60	Macrophage 3 (M)	MARCO
CAP1	5.27E-64	0.307922677	0.899	0.687	1.27E-59	Macrophage 3 (M)	CAP1
MANF	6.96E-64	0.251760038	0.519	0.266	1.67E-59	Macrophage 3 (M)	MANF
ANXA11	7.76E-64	0.305101756	0.715	0.449	1.86E-59	Macrophage 3 (M)	ANXA11
ABHD2	1.05E-63	0.265156304	0.59	0.324	2.53E-59	Macrophage 3 (M)	ABHD2
MYDGF	7.06E-63	0.283946619	0.715	0.442	1.70E-58	Macrophage 3 (M)	MYDGF
HSPB1	1.57E-62	0.312424811	0.782	0.509	3.78E-58	Macrophage 3 (M)	HSPB1
CHI3L11	7.56E-61	0.875428285	0.387	0.193	1.82E-56	Macrophage 3 (M)	CHI3L1
CTSZ1	2.72E-60	0.315454917	0.979	0.79	6.54E-56	Macrophage 3 (M)	CTSZ
NDUFB2	9.42E-60	0.291622434	0.853	0.62	2.26E-55	Macrophage 3 (M)	NDUFB2
ATP6V1B2	1.57E-59	0.2823408	0.731	0.45	3.77E-55	Macrophage 3 (M)	ATP6V1B2
WDR1	2.37E-59	0.267827964	0.704	0.443	5.69E-55	Macrophage 3 (M)	WDR1
ARHGDIA	2.82E-59	0.260974246	0.768	0.496	6.78E-55	Macrophage 3 (M)	ARHGDIA
TAGLN2	1.46E-58	0.29066049	0.873	0.613	3.52E-54	Macrophage 3 (M)	TAGLN2
M6PR	8.08E-58	0.275021575	0.782	0.523	1.94E-53	Macrophage 3 (M)	M6PR
EIF4G2	1.25E-57	0.272976382	0.876	0.655	3.01E-53	Macrophage 3 (M)	EIF4G2
YWHAZ	2.91E-56	0.262066996	0.899	0.697	7.00E-52	Macrophage 3 (M)	YWHAZ
AHNAK	3.34E-55	0.286204278	0.886	0.641	8.02E-51	Macrophage 3 (M)	AHNAK
PLD31	4.17E-55	0.337555115	0.863	0.611	1.00E-50	Macrophage 3 (M)	PLD3
ADM	4.48E-55	0.304684748	0.28	0.113	1.08E-50	Macrophage 3 (M)	ADM
ZYX	2.02E-54	0.272398294	0.713	0.455	4.86E-50	Macrophage 3 (M)	ZYX
PSAP1	7.37E-53	0.276979351	0.996	0.86	1.77E-48	Macrophage 3 (M)	PSAP
TIMP21	1.34E-52	0.25682263	0.856	0.599	3.22E-48	Macrophage 3 (M)	TIMP2
CEBPB1	1.02E-51	0.296686057	0.893	0.633	2.44E-47	Macrophage 3 (M)	CEBPB
SLC15A3	2.11E-51	0.29211667	0.774	0.508	5.07E-47	Macrophage 3 (M)	SLC15A3
UQCRQ	3.36E-51	0.250993456	0.802	0.553	8.09E-47	Macrophage 3 (M)	UQCRQ
RNH1	8.23E-51	0.260431798	0.843	0.586	1.98E-46	Macrophage 3 (M)	RNH1
RTN4	9.60E-51	0.250291962	0.913	0.695	2.31E-46	Macrophage 3 (M)	RTN4
LGALS91	1.39E-50	0.255217177	0.806	0.551	3.33E-46	Macrophage 3 (M)	LGALS9
CTSA	2.68E-50	0.255776344	0.821	0.576	6.43E-46	Macrophage 3 (M)	CTSA
PLXDC21	1.53E-49	0.259394683	0.834	0.585	3.68E-45	Macrophage 3 (M)	PLXDC2
GM2A1	4.06E-49	0.355873695	0.712	0.471	9.76E-45	Macrophage 3 (M)	GM2A
GNAS1	5.33E-49	0.268964841	0.935	0.767	1.28E-44	Macrophage 3 (M)	GNAS
HMOX11	2.85E-43	0.42297534	0.794	0.538	6.84E-39	Macrophage 3 (M)	HMOX1
ABL21	4.55E-43	0.281795454	0.505	0.29	1.09E-38	Macrophage 3 (M)	ABL2
GLUL1	1.12E-35	0.268823624	0.961	0.745	2.68E-31	Macrophage 3 (M)	GLUL
ATF5	1.40E-34	0.303824845	0.574	0.364	3.37E-30	Macrophage 3 (M)	ATF5
CCL201	1.88E-33	0.444831772	0.349	0.194	4.52E-29	Macrophage 3 (M)	CCL20
NUPR11	1.42E-27	0.578993301	0.585	0.414	3.41E-23	Macrophage 3 (M)	NUPR1
IFI61	9.37E-21	0.41960905	0.807	0.637	2.25E-16	Macrophage 3 (M)	IFI6
TOP2A	0	2.007652073	0.813	0.029	0	Cycling M3 (M)	TOP2A
MKI67	0	1.781288708	0.825	0.02	0	Cycling M3 (M)	MKI67
CENPF	0	1.62451757	0.743	0.05	0	Cycling M3 (M)	CENPF
NUSAP1	0	1.398744967	0.801	0.048	0	Cycling M3 (M)	NUSAP1
CDK1	0	1.308919117	0.725	0.027	0	Cycling M3 (M)	CDK1
TPX2	0	1.129863792	0.626	0.018	0	Cycling M3 (M)	TPX2
TYMS	0	1.124655405	0.76	0.023	0	Cycling M3 (M)	TYMS
ASPM	0	1.1089746	0.561	0.014	0	Cycling M3 (M)	ASPM
TK1	0	0.98405077	0.731	0.019	0	Cycling M3 (M)	TK1
RRM2	0	0.960603276	0.556	0.011	0	Cycling M3 (M)	RRM2
HMMR	0	0.939455263	0.567	0.016	0	Cycling M3 (M)	HMMR
PCLAF	0	0.93568633	0.643	0.02	0	Cycling M3 (M)	PCLAF
BIRC5	0	0.909460738	0.62	0.013	0	Cycling M3 (M)	BIRC5
CEP55	0	0.892460862	0.573	0.011	0	Cycling M3 (M)	CEP55
UBE2C	0	0.89187924	0.509	0.013	0	Cycling M3 (M)	UBE2C
GTSE1	0	0.881139952	0.491	0.01	0	Cycling M3 (M)	GTSE1
ANLN	0	0.837710751	0.485	0.008	0	Cycling M3 (M)	ANLN
HIST1H1B	0	0.83632304	0.433	0.016	0	Cycling M3 (M)	HIST1H1B
CLSPN	0	0.817782558	0.556	0.023	0	Cycling M3 (M)	CLSPN
KIF11	0	0.771336317	0.573	0.014	0	Cycling M3 (M)	KIF11
CDKN3	0	0.758310717	0.526	0.017	0	Cycling M3 (M)	CDKN3
PLK1	0	0.754072374	0.439	0.007	0	Cycling M3 (M)	PLK1
NCAPG	0	0.742016062	0.532	0.009	0	Cycling M3 (M)	NCAPG
CCNA2	0	0.733442796	0.544	0.009	0	Cycling M3 (M)	CCNA2
DLGAP5	0	0.718399979	0.468	0.008	0	Cycling M3 (M)	DLGAP5
KNL1	0	0.700727199	0.544	0.02	0	Cycling M3 (M)	KNL1
CDC20	0	0.695802784	0.439	0.009	0	Cycling M3 (M)	CDC20
ESCO2	0	0.687431487	0.497	0.013	0	Cycling M3 (M)	ESCO2
FAM111B	0	0.650531051	0.392	0.005	0	Cycling M3 (M)	FAM111B
SHCBP1	0	0.643642383	0.509	0.015	0	Cycling M3 (M)	SHCBP1
MYBL2	0	0.61832416	0.474	0.007	0	Cycling M3 (M)	MYBL2
AURKB	0	0.608317099	0.444	0.009	0	Cycling M3 (M)	AURKB
FOXM1	0	0.563035753	0.485	0.007	0	Cycling M3 (M)	FOXM1
DIAPH3	0	0.559902444	0.439	0.007	0	Cycling M3 (M)	DIAPH3
CCNE2	0	0.557259709	0.322	0.006	0	Cycling M3 (M)	CCNE2
UHRF1	0	0.555667698	0.386	0.006	0	Cycling M3 (M)	UHRF1
NUF2	0	0.535028102	0.386	0.01	0	Cycling M3 (M)	NUF2
CDT1	0	0.532783153	0.398	0.012	0	Cycling M3 (M)	CDT1
KIFC1	0	0.531303306	0.398	0.013	0	Cycling M3 (M)	KIFC1
CENPM	0	0.528803084	0.427	0.013	0	Cycling M3 (M)	CENPM
KIF4A	0	0.498987326	0.421	0.007	0	Cycling M3 (M)	KIF4A
KIF14	0	0.498247783	0.304	0.006	0	Cycling M3 (M)	KIF14
BUB1B	0	0.492251591	0.386	0.007	0	Cycling M3 (M)	BUB1B
NCAPH	0	0.479242341	0.45	0.008	0	Cycling M3 (M)	NCAPH
KIF23	0	0.457443882	0.333	0.009	0	Cycling M3 (M)	KIF23
KIF2C	0	0.442053512	0.304	0.007	0	Cycling M3 (M)	KIF2C
SPC25	0	0.437071795	0.322	0.006	0	Cycling M3 (M)	SPC25
KIF15	0	0.435867793	0.333	0.007	0	Cycling M3 (M)	KIF15
PKMYT1	0	0.434484966	0.351	0.006	0	Cycling M3 (M)	PKMYT1
CKAP2L	0	0.430217898	0.298	0.006	0	Cycling M3 (M)	CKAP2L
CDCA2	0	0.41603251	0.322	0.006	0	Cycling M3 (M)	CDCA2
CDCA5	0	0.409013235	0.357	0.008	0	Cycling M3 (M)	CDCA5
DEPDC1	0	0.403295598	0.292	0.004	0	Cycling M3 (M)	DEPDC1
MELK	0	0.390356864	0.322	0.007	0	Cycling M3 (M)	MELK
POLQ	0	0.38904364	0.316	0.005	0	Cycling M3 (M)	POLQ
KIF20A	0	0.385742227	0.263	0.003	0	Cycling M3 (M)	KIF20A
HJURP	0	0.385427899	0.298	0.006	0	Cycling M3 (M)	HJURP
MCM10	0	0.376587104	0.322	0.006	0	Cycling M3 (M)	MCM10
CDCA3	7.61E-307	0.340589155	0.275	0.006	1.83E-302	Cycling M3 (M)	CDCA3
NDC80	9.65E-303	0.45150595	0.368	0.012	2.32E-298	Cycling M3 (M)	NDC80
IQGAP3	1.30E-295	0.320437797	0.298	0.007	3.14E-291	Cycling M3 (M)	IQGAP3
SGO1	9.80E-294	0.384575626	0.357	0.011	2.36E-289	Cycling M3 (M)	SGO1
ARHGAP11A	4.21E-293	0.507972213	0.427	0.017	1.01E-288	Cycling M3 (M)	ARHGAP11A
BUB1	1.25E-278	0.517385181	0.415	0.017	3.00E-274	Cycling M3 (M)	BUB1
TCF19	8.55E-273	0.422964673	0.38	0.014	2.05E-268	Cycling M3 (M)	TCF19
TTK	1.98E-270	0.366128248	0.263	0.006	4.75E-266	Cycling M3 (M)	TTK
CCNB2	2.03E-269	0.576614084	0.392	0.016	4.88E-265	Cycling M3 (M)	CCNB2
CIT	3.34E-258	0.360953957	0.257	0.006	8.02E-254	Cycling M3 (M)	CIT
ASF1B	3.75E-257	0.568490305	0.409	0.018	9.02E-253	Cycling M3 (M)	ASF1B
CENPU	6.61E-250	0.74103067	0.556	0.036	1.59E-245	Cycling M3 (M)	CENPU
ZWINT	8.81E-247	0.603637406	0.485	0.027	2.12E-242	Cycling M3 (M)	ZWINT
CCNB1	1.59E-237	0.786444067	0.421	0.021	3.82E-233	Cycling M3 (M)	CCNB1
CHEK1	2.98E-233	0.401361137	0.398	0.019	7.17E-229	Cycling M3 (M)	CHEK1
NCAPG2	4.65E-231	0.524144345	0.444	0.024	1.12E-226	Cycling M3 (M)	NCAPG2
PRC1	2.18E-227	0.370285745	0.298	0.01	5.25E-223	Cycling M3 (M)	PRC1
TMEM106C	2.61E-222	0.6059498	0.591	0.045	6.28E-218	Cycling M3 (M)	TMEM106C
CENPK	3.61E-216	0.52345387	0.456	0.027	8.68E-212	Cycling M3 (M)	CENPK
CDCA8	2.30E-214	0.314971517	0.298	0.011	5.52E-210	Cycling M3 (M)	CDCA8
CCNF	1.49E-206	0.278704991	0.257	0.008	3.58E-202	Cycling M3 (M)	CCNF
WDR34	5.17E-206	0.414725048	0.363	0.018	1.24E-201	Cycling M3 (M)	WDR34
HELLS	1.71E-203	0.650757085	0.45	0.028	4.10E-199	Cycling M3 (M)	HELLS
CENPE	1.80E-200	0.985707069	0.591	0.052	4.33E-196	Cycling M3 (M)	CENPE
MAD2L1	3.62E-191	0.417771619	0.351	0.018	8.70E-187	Cycling M3 (M)	MAD2L1
DHFR	1.22E-187	0.8694993	0.626	0.063	2.94E-183	Cycling M3 (M)	DHFR
STMN1	5.62E-179	1.590097295	0.965	0.184	1.35E-174	Cycling M3 (M)	STMN1
GINS2	1.08E-174	0.287759895	0.292	0.013	2.61E-170	Cycling M3 (M)	GINS2
CDKN2C	5.19E-171	0.562102122	0.38	0.024	1.25E-166	Cycling M3 (M)	CDKN2C
SGO2	5.20E-167	0.737133728	0.526	0.049	1.25E-162	Cycling M3 (M)	SGO2
RAD51AP1	9.16E-165	0.753008506	0.62	0.07	2.20E-160	Cycling M3 (M)	RAD51AP1
SPAG5	5.80E-159	0.36497045	0.316	0.018	1.39E-154	Cycling M3 (M)	SPAG5
CCDC34	5.88E-155	0.388849569	0.392	0.028	1.41E-150	Cycling M3 (M)	CCDC34
CIP2A	9.56E-155	0.450213594	0.363	0.024	2.30E-150	Cycling M3 (M)	CIP2A
BRCA1	1.50E-154	0.531538038	0.444	0.037	3.60E-150	Cycling M3 (M)	BRCA1
FANCI	1.93E-154	0.414374098	0.322	0.019	4.65E-150	Cycling M3 (M)	FANCI
NCAPD2	2.18E-154	0.612086072	0.52	0.051	5.24E-150	Cycling M3 (M)	NCAPD2
TACC3	7.25E-153	0.806122715	0.69	0.093	1.74E-148	Cycling M3 (M)	TACC3
ATAD2	1.35E-151	0.61736393	0.556	0.058	3.24E-147	Cycling M3 (M)	ATAD2
WDR76	2.35E-148	0.42383757	0.363	0.025	5.64E-144	Cycling M3 (M)	WDR76
AURKA	1.88E-147	0.593611907	0.409	0.033	4.52E-143	Cycling M3 (M)	AURKA
PTTG1	1.90E-147	0.889319309	0.538	0.058	4.58E-143	Cycling M3 (M)	PTTG1
MCM4	9.14E-147	0.664205068	0.48	0.046	2.20E-142	Cycling M3 (M)	MCM4
MCM7	8.89E-146	0.649994378	0.532	0.056	2.14E-141	Cycling M3 (M)	MCM7
SMC4	1.93E-144	1.112103407	0.889	0.173	4.63E-140	Cycling M3 (M)	SMC4
RACGAP1	5.21E-144	0.548976921	0.433	0.038	1.25E-139	Cycling M3 (M)	RACGAP1
GGH	8.32E-132	0.502194416	0.427	0.04	2.00E-127	Cycling M3 (M)	GGH
PHF19	3.04E-131	0.539378599	0.538	0.062	7.31E-127	Cycling M3 (M)	PHF19
KIF20B	2.96E-130	0.726646069	0.661	0.095	7.11E-126	Cycling M3 (M)	KIF20B
CKS1B	5.92E-127	0.732822305	0.649	0.096	1.42E-122	Cycling M3 (M)	CKS1B
UBE2T	1.21E-126	0.31712749	0.31	0.021	2.91E-122	Cycling M3 (M)	UBE2T
FEN1	1.27E-125	0.430536945	0.398	0.036	3.04E-121	Cycling M3 (M)	FEN1
MCM2	6.49E-124	0.328349251	0.304	0.021	1.56E-119	Cycling M3 (M)	MCM2
GPSM2	1.40E-119	0.288399212	0.292	0.02	3.36E-115	Cycling M3 (M)	GPSM2
GMNN	7.05E-119	0.454672345	0.497	0.058	1.69E-114	Cycling M3 (M)	GMNN
SMC2	1.68E-115	0.779627734	0.708	0.127	4.03E-111	Cycling M3 (M)	SMC2
H2AFX	4.73E-113	0.734683616	0.591	0.088	1.14E-108	Cycling M3 (M)	H2AFX
DTYMK	6.80E-111	0.726957671	0.643	0.108	1.63E-106	Cycling M3 (M)	DTYMK
PCNA	1.84E-109	0.962684561	0.69	0.133	4.43E-105	Cycling M3 (M)	PCNA
CKAP2	1.25E-108	0.820983148	0.655	0.111	3.02E-104	Cycling M3 (M)	CKAP2
SPDL1	4.66E-107	0.50670559	0.392	0.041	1.12E-102	Cycling M3 (M)	SPDL1
HMGB2	3.27E-102	1.083665082	0.83	0.204	7.85E-98	Cycling M3 (M)	HMGB2
BRCA2	1.73E-98	0.727443662	0.614	0.106	4.16E-94	Cycling M3 (M)	BRCA2
TUBB1	1.23E-97	1.468656413	0.994	0.635	2.97E-93	Cycling M3 (M)	TUBB
RRM1	6.67E-97	0.610437401	0.567	0.093	1.60E-92	Cycling M3 (M)	RRM1
KIF22	7.34E-97	0.464544006	0.485	0.067	1.76E-92	Cycling M3 (M)	KIF22
TMPO	2.05E-96	0.810047707	0.801	0.187	4.92E-92	Cycling M3 (M)	TMPO
ORC6	2.30E-96	0.33010162	0.298	0.026	5.54E-92	Cycling M3 (M)	ORC6
FBXO5	1.18E-95	0.37413238	0.292	0.025	2.83E-91	Cycling M3 (M)	FBXO5
DNAJC9	5.41E-94	0.513542628	0.526	0.08	1.30E-89	Cycling M3 (M)	DNAJC9
HIST1H1D	3.60E-93	0.810169945	0.491	0.073	8.66E-89	Cycling M3 (M)	HIST1H1D
ECT2	8.98E-89	0.339058838	0.363	0.042	2.16E-84	Cycling M3 (M)	ECT2
H2AFZ	4.39E-88	1.401808579	0.942	0.471	1.05E-83	Cycling M3 (M)	H2AFZ
WEE1	3.80E-87	0.28714832	0.281	0.025	9.14E-83	Cycling M3 (M)	WEE1
MCM6	1.38E-82	0.576468084	0.433	0.063	3.32E-78	Cycling M3 (M)	MCM6
KDELC2	3.10E-81	0.472696822	0.38	0.049	7.46E-77	Cycling M3 (M)	KDELC2
TUBA1B	3.08E-76	1.210671741	0.994	0.779	7.41E-72	Cycling M3 (M)	TUBA1B
CENPW	2.35E-75	0.461883254	0.456	0.075	5.65E-71	Cycling M3 (M)	CENPW
LMNB2	3.75E-75	0.366020216	0.363	0.048	9.00E-71	Cycling M3 (M)	LMNB2
RFC3	8.74E-73	0.344602375	0.31	0.037	2.10E-68	Cycling M3 (M)	RFC3
BARD1	1.57E-72	0.378975368	0.468	0.079	3.76E-68	Cycling M3 (M)	BARD1
LPL1	1.93E-72	1.045675046	0.491	0.092	4.64E-68	Cycling M3 (M)	LPL
NSD2	1.57E-71	0.446915855	0.48	0.085	3.77E-67	Cycling M3 (M)	NSD2
PRR11	3.15E-70	0.484016572	0.404	0.063	7.56E-66	Cycling M3 (M)	PRR11
HMGN2	7.09E-70	1.23011184	0.988	0.634	1.70E-65	Cycling M3 (M)	HMGN2
FANCA	9.88E-70	0.311513077	0.292	0.034	2.38E-65	Cycling M3 (M)	FANCA
FAM111A	2.54E-69	0.752864286	0.76	0.216	6.11E-65	Cycling M3 (M)	FAM111A
HMGB1	2.86E-69	1.005273604	0.994	0.827	6.87E-65	Cycling M3 (M)	HMGB1
KPNA2	3.47E-67	0.937557707	0.69	0.191	8.34E-63	Cycling M3 (M)	KPNA2
CKS2	4.70E-67	0.561685474	0.585	0.129	1.13E-62	Cycling M3 (M)	CKS2
LMNB1	1.15E-66	0.507833183	0.538	0.11	2.77E-62	Cycling M3 (M)	LMNB1
PARP2	6.34E-65	0.318565739	0.31	0.041	1.52E-60	Cycling M3 (M)	PARP2
RFWD3	1.32E-64	0.327489347	0.368	0.056	3.17E-60	Cycling M3 (M)	RFWD3
SAC3D1	1.12E-61	0.350701652	0.327	0.048	2.70E-57	Cycling M3 (M)	SAC3D1
TFDP1	1.20E-61	0.416433848	0.48	0.094	2.88E-57	Cycling M3 (M)	TFDP1
CEP78	3.80E-61	0.329730879	0.368	0.058	9.13E-57	Cycling M3 (M)	CEP78
POLA1	7.84E-60	0.269375028	0.269	0.033	1.88E-55	Cycling M3 (M)	POLA1
DUT	8.19E-60	0.800004542	0.719	0.234	1.97E-55	Cycling M3 (M)	DUT
LIG1	2.11E-58	0.334985669	0.374	0.063	5.06E-54	Cycling M3 (M)	LIG1
RBL1	3.76E-57	0.280027087	0.298	0.042	9.03E-53	Cycling M3 (M)	RBL1
NUCKS1	4.41E-57	0.901701514	0.953	0.543	1.06E-52	Cycling M3 (M)	NUCKS1
HMGB3	5.81E-56	0.448762536	0.509	0.113	1.40E-51	Cycling M3 (M)	HMGB3
EZH2	2.14E-55	0.343831382	0.462	0.094	5.14E-51	Cycling M3 (M)	EZH2
NCAPD3	2.99E-55	0.359673068	0.357	0.06	7.18E-51	Cycling M3 (M)	NCAPD3
HIST1H4C	3.59E-55	1.606903053	0.825	0.375	8.64E-51	Cycling M3 (M)	HIST1H4C
CBX5	8.02E-55	0.478742926	0.532	0.126	1.93E-50	Cycling M3 (M)	CBX5
RPL39L	1.21E-54	0.258456448	0.257	0.033	2.91E-50	Cycling M3 (M)	RPL39L
DEK	5.03E-54	0.796572551	0.959	0.61	1.21E-49	Cycling M3 (M)	DEK
CCDC18	2.96E-53	0.297044001	0.304	0.046	7.12E-49	Cycling M3 (M)	CCDC18
PAICS	8.68E-53	0.38060358	0.439	0.09	2.09E-48	Cycling M3 (M)	PAICS
TUBA1C1	9.46E-53	0.935198334	0.877	0.417	2.27E-48	Cycling M3 (M)	TUBA1C
MCM3	1.45E-52	0.441220526	0.439	0.092	3.47E-48	Cycling M3 (M)	MCM3
ICMT	1.55E-52	0.393752404	0.456	0.098	3.72E-48	Cycling M3 (M)	ICMT
ATAD5	3.31E-52	0.323332023	0.304	0.047	7.95E-48	Cycling M3 (M)	ATAD5
RPA3	4.63E-52	0.51541801	0.602	0.169	1.11E-47	Cycling M3 (M)	RPA3
RBBP8	3.05E-51	0.3649106	0.444	0.093	7.34E-47	Cycling M3 (M)	RBBP8
RBBP7	8.61E-51	0.445377196	0.667	0.19	2.07E-46	Cycling M3 (M)	RBBP7
ZWILCH	9.66E-51	0.26749634	0.316	0.052	2.32E-46	Cycling M3 (M)	ZWILCH
CENPX	1.86E-49	0.535623848	0.608	0.183	4.48E-45	Cycling M3 (M)	CENPX
ALDH7A1	4.58E-49	0.293718548	0.31	0.051	1.10E-44	Cycling M3 (M)	ALDH7A1
CD1091	3.73E-48	0.337895058	0.433	0.091	8.97E-44	Cycling M3 (M)	CD109
NME4	4.51E-48	0.431970781	0.567	0.153	1.08E-43	Cycling M3 (M)	NME4
ALOX5AP1	9.66E-48	0.634581951	0.754	0.261	2.32E-43	Cycling M3 (M)	ALOX5AP
JADE1	1.03E-47	0.266486281	0.351	0.064	2.48E-43	Cycling M3 (M)	JADE1
RFC4	1.15E-47	0.255681439	0.257	0.037	2.76E-43	Cycling M3 (M)	RFC4
DBF4	4.41E-47	0.388837534	0.444	0.102	1.06E-42	Cycling M3 (M)	DBF4
ALYREF	1.91E-46	0.269594846	0.386	0.078	4.60E-42	Cycling M3 (M)	ALYREF
HIRIP3	2.31E-46	0.26096502	0.316	0.055	5.54E-42	Cycling M3 (M)	HIRIP3
HIST1H1C	5.51E-46	0.454482104	0.415	0.092	1.32E-41	Cycling M3 (M)	HIST1H1C
PPIA	2.08E-45	0.585146707	0.994	0.858	5.00E-41	Cycling M3 (M)	PPIA
HADH	2.78E-45	0.418601028	0.497	0.126	6.67E-41	Cycling M3 (M)	HADH
CKAP4	3.52E-45	0.3313145	0.427	0.096	8.45E-41	Cycling M3 (M)	CKAP4
RCC1	3.68E-45	0.270063862	0.298	0.051	8.85E-41	Cycling M3 (M)	RCC1
SPP12	5.60E-45	1.271180731	0.848	0.44	1.35E-40	Cycling M3 (M)	SPP1
ITGB3BP	2.48E-44	0.31947522	0.357	0.071	5.97E-40	Cycling M3 (M)	ITGB3BP
TUBB4B	1.53E-43	0.755784294	0.819	0.371	3.68E-39	Cycling M3 (M)	TUBB4B
RANBP1	1.98E-43	0.626991444	0.725	0.287	4.76E-39	Cycling M3 (M)	RANBP1
USP1	6.07E-43	0.475690752	0.509	0.138	1.46E-38	Cycling M3 (M)	USP1
POLD2	7.73E-43	0.26699	0.357	0.073	1.86E-38	Cycling M3 (M)	POLD2
NRP12	7.85E-43	0.629159907	0.801	0.312	1.89E-38	Cycling M3 (M)	NRP1
H2AFV	9.70E-43	0.675581774	0.848	0.406	2.33E-38	Cycling M3 (M)	H2AFV
SMC1A	1.78E-42	0.599490268	0.789	0.331	4.27E-38	Cycling M3 (M)	SMC1A
SKA2	2.35E-42	0.286649077	0.409	0.092	5.65E-38	Cycling M3 (M)	SKA2
NRM	3.15E-42	0.294759574	0.304	0.056	7.58E-38	Cycling M3 (M)	NRM
TUBG1	6.00E-42	0.281979525	0.333	0.066	1.44E-37	Cycling M3 (M)	TUBG1
NASP	1.53E-41	0.648579632	0.766	0.311	3.69E-37	Cycling M3 (M)	NASP
BRI3BP	2.03E-41	0.308284358	0.363	0.077	4.87E-37	Cycling M3 (M)	BRI3BP
CDC25B	3.05E-41	0.40033122	0.345	0.071	7.34E-37	Cycling M3 (M)	CDC25B
CBX1	3.64E-41	0.424316513	0.626	0.198	8.76E-37	Cycling M3 (M)	CBX1
PARP1	3.90E-41	0.632296331	0.719	0.295	9.38E-37	Cycling M3 (M)	PARP1
TGFBI1	6.00E-41	0.651467833	0.924	0.5	1.44E-36	Cycling M3 (M)	TGFBI
MGST11	7.47E-41	0.474647675	0.439	0.113	1.80E-36	Cycling M3 (M)	MGST1
CDCA7L	1.77E-40	0.276843727	0.31	0.059	4.27E-36	Cycling M3 (M)	CDCA7L
DDX39A	1.98E-40	0.368732029	0.596	0.183	4.76E-36	Cycling M3 (M)	DDX39A
MAZ	4.66E-40	0.409650337	0.661	0.222	1.12E-35	Cycling M3 (M)	MAZ
SAE1	5.14E-40	0.311392401	0.45	0.114	1.24E-35	Cycling M3 (M)	SAE1
ITGB52	5.19E-40	0.521970468	0.567	0.176	1.25E-35	Cycling M3 (M)	ITGB5
ANP32E	8.67E-40	0.538291618	0.614	0.204	2.08E-35	Cycling M3 (M)	ANP32E
CD2761	1.35E-39	0.410571066	0.491	0.136	3.25E-35	Cycling M3 (M)	CD276
ITGA6	1.43E-39	0.406685787	0.462	0.12	3.43E-35	Cycling M3 (M)	ITGA6
CARHSP1	2.03E-39	0.352472058	0.462	0.119	4.89E-35	Cycling M3 (M)	CARHSP1
POLD3	2.40E-39	0.328996264	0.462	0.12	5.77E-35	Cycling M3 (M)	POLD3
SSRP1	2.69E-39	0.354576538	0.515	0.147	6.48E-35	Cycling M3 (M)	SSRP1
MCM5	2.90E-39	0.514416501	0.509	0.154	6.96E-35	Cycling M3 (M)	MCM5
MTHFD1	3.03E-39	0.343059926	0.444	0.115	7.28E-35	Cycling M3 (M)	MTHFD1
ANP32B	8.74E-39	0.600460327	0.883	0.483	2.10E-34	Cycling M3 (M)	ANP32B
HIST1H1E	1.18E-38	0.364795891	0.398	0.096	2.84E-34	Cycling M3 (M)	HIST1H1E
C19orf48	2.07E-38	0.267672855	0.257	0.045	4.97E-34	Cycling M3 (M)	C19orf48
LSM4	2.64E-38	0.554688883	0.702	0.289	6.34E-34	Cycling M3 (M)	LSM4
DNMT1	3.56E-38	0.59268749	0.801	0.366	8.55E-34	Cycling M3 (M)	DNMT1
HTRA11	4.51E-38	0.633937334	0.573	0.178	1.08E-33	Cycling M3 (M)	HTRA1
BUB3	9.57E-38	0.37767518	0.655	0.224	2.30E-33	Cycling M3 (M)	BUB3
HLTF	7.90E-37	0.250526042	0.339	0.074	1.90E-32	Cycling M3 (M)	HLTF
CCDC88A1	8.84E-37	0.625126431	0.959	0.613	2.12E-32	Cycling M3 (M)	CCDC88A
BOLA3	2.80E-36	0.331673159	0.515	0.153	6.73E-32	Cycling M3 (M)	BOLA3
MSH2	3.23E-36	0.263252922	0.263	0.048	7.77E-32	Cycling M3 (M)	MSH2
CKAP5	4.62E-36	0.454414286	0.468	0.138	1.11E-31	Cycling M3 (M)	CKAP5
SNRNP25	1.26E-35	0.312079127	0.515	0.157	3.03E-31	Cycling M3 (M)	SNRNP25
UBE2S	1.63E-35	0.461471334	0.573	0.193	3.92E-31	Cycling M3 (M)	UBE2S
CHAF1A	2.20E-35	0.260317881	0.257	0.047	5.28E-31	Cycling M3 (M)	CHAF1A
RMI1	3.25E-35	0.266184938	0.275	0.054	7.80E-31	Cycling M3 (M)	RMI1
GPAA1	4.16E-35	0.345505442	0.567	0.181	1.00E-30	Cycling M3 (M)	GPAA1
CSE1L	4.85E-35	0.346648982	0.439	0.121	1.17E-30	Cycling M3 (M)	CSE1L
GALM1	6.28E-35	0.49258275	0.596	0.217	1.51E-30	Cycling M3 (M)	GALM
RANGAP1	6.47E-35	0.302460315	0.462	0.13	1.55E-30	Cycling M3 (M)	RANGAP1
MMD	1.41E-34	0.356950682	0.439	0.12	3.40E-30	Cycling M3 (M)	MMD
RAN	1.49E-34	0.567258938	0.895	0.54	3.59E-30	Cycling M3 (M)	RAN
SMC3	1.56E-34	0.457662709	0.708	0.285	3.74E-30	Cycling M3 (M)	SMC3
RAD21	3.43E-34	0.585531708	0.749	0.328	8.24E-30	Cycling M3 (M)	RAD21
ATL3	4.54E-34	0.401601127	0.579	0.201	1.09E-29	Cycling M3 (M)	ATL3
RNF26	5.29E-34	0.278172934	0.263	0.052	1.27E-29	Cycling M3 (M)	RNF26
HNRNPAB	5.51E-34	0.5991769	0.766	0.376	1.32E-29	Cycling M3 (M)	HNRNPAB
HAUS2	9.90E-34	0.273591537	0.368	0.091	2.38E-29	Cycling M3 (M)	HAUS2
TTF2	8.16E-33	0.27410593	0.386	0.099	1.96E-28	Cycling M3 (M)	TTF2
CACYBP	5.48E-32	0.490010299	0.737	0.331	1.32E-27	Cycling M3 (M)	CACYBP
11-Sep	8.62E-32	0.335382412	0.643	0.237	2.07E-27	Cycling M3 (M)	11-Sep
PTMA	8.91E-32	0.441054443	1	0.967	2.14E-27	Cycling M3 (M)	PTMA
DCK	1.17E-31	0.380463431	0.462	0.143	2.81E-27	Cycling M3 (M)	DCK
CDK4	1.80E-31	0.287805153	0.503	0.159	4.34E-27	Cycling M3 (M)	CDK4
IDH2	6.93E-31	0.470627991	0.713	0.318	1.67E-26	Cycling M3 (M)	IDH2
PGP	7.76E-31	0.314755408	0.485	0.155	1.86E-26	Cycling M3 (M)	PGP
CEP152	7.99E-31	0.274024366	0.275	0.059	1.92E-26	Cycling M3 (M)	CEP152
SUZ12	1.89E-30	0.402631585	0.643	0.246	4.55E-26	Cycling M3 (M)	SUZ12
MRPL37	2.15E-30	0.294677145	0.439	0.132	5.18E-26	Cycling M3 (M)	MRPL37
HERC5	6.01E-30	0.394519149	0.456	0.141	1.44E-25	Cycling M3 (M)	HERC5
PIEZO1	6.31E-30	0.283579441	0.427	0.126	1.52E-25	Cycling M3 (M)	PIEZO1
FARP1	7.58E-30	0.355704379	0.351	0.091	1.82E-25	Cycling M3 (M)	FARP1
HACD3	8.91E-30	0.350277182	0.456	0.142	2.14E-25	Cycling M3 (M)	HACD3
PRKDC	9.19E-30	0.502659282	0.696	0.322	2.21E-25	Cycling M3 (M)	PRKDC
ADAM15	9.32E-30	0.266079932	0.427	0.126	2.24E-25	Cycling M3 (M)	ADAM15
BAZ1B	1.30E-29	0.406831023	0.667	0.271	3.14E-25	Cycling M3 (M)	BAZ1B
ZDHHC12	1.45E-29	0.379882684	0.556	0.201	3.49E-25	Cycling M3 (M)	ZDHHC12
LONP1	4.32E-29	0.296675077	0.427	0.13	1.04E-24	Cycling M3 (M)	LONP1
ARL6IP1	8.15E-29	0.738902149	0.825	0.421	1.96E-24	Cycling M3 (M)	ARL6IP1
SLC1A4	1.12E-28	0.270691375	0.327	0.084	2.69E-24	Cycling M3 (M)	SLC1A4
NME11	1.35E-28	0.288935296	0.526	0.181	3.24E-24	Cycling M3 (M)	NME1
PPP1R14B1	1.54E-28	0.428351185	0.632	0.261	3.70E-24	Cycling M3 (M)	PPP1R14B
IARS	1.93E-28	0.26808057	0.38	0.107	4.63E-24	Cycling M3 (M)	IARS
ENOSF1	2.63E-28	0.258040928	0.398	0.113	6.32E-24	Cycling M3 (M)	ENOSF1
LSM5	3.98E-28	0.36690442	0.614	0.246	9.56E-24	Cycling M3 (M)	LSM5
HPGDS	5.35E-28	0.536877673	0.298	0.074	1.29E-23	Cycling M3 (M)	HPGDS
ME21	8.43E-28	0.553537075	0.754	0.391	2.03E-23	Cycling M3 (M)	ME2
NAA50	2.08E-27	0.327891646	0.556	0.206	5.00E-23	Cycling M3 (M)	NAA50
TSPAN3	3.14E-27	0.364481207	0.62	0.248	7.54E-23	Cycling M3 (M)	TSPAN3
PSMC3	3.78E-27	0.37133317	0.725	0.321	9.08E-23	Cycling M3 (M)	PSMC3
GSN1	1.68E-26	0.777587803	0.825	0.547	4.05E-22	Cycling M3 (M)	GSN
UBASH3B1	1.88E-26	0.253134889	0.398	0.12	4.52E-22	Cycling M3 (M)	UBASH3B
LDHB	1.91E-26	0.46450354	0.731	0.364	4.58E-22	Cycling M3 (M)	LDHB
ANKH1	2.77E-26	0.386609611	0.491	0.168	6.65E-22	Cycling M3 (M)	ANKH
KHSRP	6.59E-26	0.350694047	0.526	0.192	1.58E-21	Cycling M3 (M)	KHSRP
EMP11	1.01E-25	0.253399331	0.386	0.114	2.42E-21	Cycling M3 (M)	EMP1
ANAPC11	1.72E-25	0.432746279	0.766	0.404	4.14E-21	Cycling M3 (M)	ANAPC11
COMMD4	1.75E-25	0.425260984	0.52	0.205	4.20E-21	Cycling M3 (M)	COMMD4
RDX	3.32E-25	0.469267187	0.795	0.395	7.98E-21	Cycling M3 (M)	RDX
SIVA1	3.71E-25	0.40002242	0.632	0.276	8.93E-21	Cycling M3 (M)	SIVA1
RNASE11	6.14E-25	0.65402347	0.895	0.49	1.47E-20	Cycling M3 (M)	RNASE1
TIMM10	8.76E-25	0.261535019	0.421	0.138	2.11E-20	Cycling M3 (M)	TIMM10
CALM3	1.13E-24	0.490316015	0.912	0.577	2.71E-20	Cycling M3 (M)	CALM3
HSPD1	1.26E-24	0.525321683	0.842	0.545	3.03E-20	Cycling M3 (M)	HSPD1
ASRGL1	1.35E-24	0.28616471	0.292	0.078	3.24E-20	Cycling M3 (M)	ASRGL1
CLTA1	1.42E-24	0.464804956	0.936	0.638	3.42E-20	Cycling M3 (M)	CLTA
ETV51	1.50E-24	0.277618195	0.398	0.124	3.61E-20	Cycling M3 (M)	ETV5
QSER1	2.30E-24	0.30712623	0.45	0.153	5.52E-20	Cycling M3 (M)	QSER1
MT-ND4	2.64E-24	0.299721954	1	0.994	6.35E-20	Cycling M3 (M)	MT-ND4
AHCY	2.82E-24	0.252037218	0.456	0.157	6.77E-20	Cycling M3 (M)	AHCY
IPO5	3.93E-24	0.254868378	0.404	0.131	9.44E-20	Cycling M3 (M)	IPO5
PGAM11	1.44E-23	0.464703105	0.76	0.441	3.47E-19	Cycling M3 (M)	PGAM1
PRDX3	1.79E-23	0.383380235	0.696	0.333	4.29E-19	Cycling M3 (M)	PRDX3
CALU1	2.28E-23	0.409723618	0.69	0.338	5.48E-19	Cycling M3 (M)	CALU
STAB11	2.64E-23	0.576149795	0.702	0.33	6.36E-19	Cycling M3 (M)	STAB1
PLP2	2.93E-23	0.290543243	0.573	0.23	7.03E-19	Cycling M3 (M)	PLP2
ITGB1BP1	3.82E-23	0.255231527	0.409	0.137	9.17E-19	Cycling M3 (M)	ITGB1BP1
POLE3	3.98E-23	0.288717294	0.52	0.204	9.58E-19	Cycling M3 (M)	POLE3
CCDC14	4.91E-23	0.291652013	0.386	0.125	1.18E-18	Cycling M3 (M)	CCDC14
GNAS2	5.54E-23	0.436576729	0.988	0.777	1.33E-18	Cycling M3 (M)	GNAS
LRRC58	8.86E-23	0.313297103	0.485	0.182	2.13E-18	Cycling M3 (M)	LRRC58
PA2G4	9.26E-23	0.420678579	0.795	0.466	2.23E-18	Cycling M3 (M)	PA2G4
LMF2	1.03E-22	0.270592604	0.48	0.179	2.49E-18	Cycling M3 (M)	LMF2
CD362	1.21E-22	0.843761467	0.62	0.344	2.90E-18	Cycling M3 (M)	CD36
SDC21	1.90E-22	0.356857168	0.462	0.169	4.56E-18	Cycling M3 (M)	SDC2
HDGF	1.96E-22	0.295648839	0.567	0.234	4.71E-18	Cycling M3 (M)	HDGF
NUDT1	2.01E-22	0.300349459	0.497	0.192	4.83E-18	Cycling M3 (M)	NUDT1
HNRNPR	2.41E-22	0.397040442	0.784	0.408	5.80E-18	Cycling M3 (M)	HNRNPR
DCAF12	2.52E-22	0.276967259	0.404	0.135	6.05E-18	Cycling M3 (M)	DCAF12
EPB41L21	2.61E-22	0.341190035	0.544	0.221	6.26E-18	Cycling M3 (M)	EPB41L2
WLS	3.27E-22	0.276621317	0.275	0.073	7.85E-18	Cycling M3 (M)	WLS
CS	3.80E-22	0.280992267	0.48	0.18	9.14E-18	Cycling M3 (M)	CS
CALM2	3.94E-22	0.460031829	0.959	0.775	9.48E-18	Cycling M3 (M)	CALM2
G3BP1	4.11E-22	0.365408246	0.766	0.393	9.87E-18	Cycling M3 (M)	G3BP1
AP2S11	5.14E-22	0.497889366	0.877	0.641	1.24E-17	Cycling M3 (M)	AP2S1
SAMD1	5.71E-22	0.279430283	0.351	0.112	1.37E-17	Cycling M3 (M)	SAMD1
SNRPD1	6.25E-22	0.305707065	0.661	0.305	1.50E-17	Cycling M3 (M)	SNRPD1
IKBIP	6.43E-22	0.254328226	0.386	0.129	1.54E-17	Cycling M3 (M)	IKBIP
TPM41	1.09E-21	0.4408472	0.906	0.615	2.61E-17	Cycling M3 (M)	TPM4
YWHAE	1.63E-21	0.414248015	0.924	0.574	3.93E-17	Cycling M3 (M)	YWHAE
SPRED11	1.81E-21	0.31285827	0.661	0.293	4.36E-17	Cycling M3 (M)	SPRED1
GGCT	2.54E-21	0.300072398	0.456	0.177	6.11E-17	Cycling M3 (M)	GGCT
TCEAL91	2.79E-21	0.386413111	0.433	0.162	6.70E-17	Cycling M3 (M)	TCEAL9
TIMP3	5.04E-21	0.451052045	0.731	0.358	1.21E-16	Cycling M3 (M)	TIMP3
DUSP23	5.62E-21	0.305807478	0.602	0.267	1.35E-16	Cycling M3 (M)	DUSP23
GPI	6.71E-21	0.346316572	0.637	0.296	1.61E-16	Cycling M3 (M)	GPI
ASPH1	6.73E-21	0.361251644	0.538	0.228	1.62E-16	Cycling M3 (M)	ASPH
CCND11	6.89E-21	0.346740039	0.368	0.124	1.66E-16	Cycling M3 (M)	CCND1
MBD4	7.26E-21	0.306503183	0.608	0.276	1.75E-16	Cycling M3 (M)	MBD4
HNRNPD	7.53E-21	0.346752261	0.836	0.462	1.81E-16	Cycling M3 (M)	HNRNPD
DHX15	8.23E-21	0.271464113	0.48	0.185	1.98E-16	Cycling M3 (M)	DHX15
HDAC2	9.63E-21	0.272228671	0.509	0.204	2.31E-16	Cycling M3 (M)	HDAC2
ST141	1.10E-20	0.398051693	0.532	0.238	2.63E-16	Cycling M3 (M)	ST14
NOP56	1.14E-20	0.319668593	0.585	0.26	2.75E-16	Cycling M3 (M)	NOP56
TPM31	1.20E-20	0.380779418	0.982	0.789	2.88E-16	Cycling M3 (M)	TPM3
ACTB1	1.36E-20	0.36647182	1	0.983	3.27E-16	Cycling M3 (M)	ACTB
EIF5A	1.50E-20	0.440373729	0.766	0.448	3.60E-16	Cycling M3 (M)	EIF5A
MZT2B	1.69E-20	0.417332793	0.754	0.436	4.06E-16	Cycling M3 (M)	MZT2B
MLEC1	2.50E-20	0.430929634	0.661	0.34	6.02E-16	Cycling M3 (M)	MLEC
TECR	2.65E-20	0.314966825	0.643	0.299	6.37E-16	Cycling M3 (M)	TECR
P4HB1	3.64E-20	0.416753843	0.906	0.608	8.76E-16	Cycling M3 (M)	P4HB
KPNB1	4.14E-20	0.429055266	0.789	0.471	9.96E-16	Cycling M3 (M)	KPNB1
RB11	4.40E-20	0.363791947	0.713	0.348	1.06E-15	Cycling M3 (M)	RB1
TRIM28	4.61E-20	0.301453617	0.515	0.215	1.11E-15	Cycling M3 (M)	TRIM28
VEGFB	6.65E-20	0.337562813	0.538	0.231	1.60E-15	Cycling M3 (M)	VEGFB
NOTUM	8.79E-20	0.250868135	0.491	0.18	2.11E-15	Cycling M3 (M)	NOTUM
DAB21	1.03E-19	0.592026602	0.883	0.535	2.48E-15	Cycling M3 (M)	DAB2
YBX11	1.06E-19	0.359469582	0.977	0.85	2.56E-15	Cycling M3 (M)	YBX1
DNAJC131	1.33E-19	0.324283612	0.515	0.212	3.20E-15	Cycling M3 (M)	DNAJC13
SLC39A81	1.34E-19	0.419858835	0.421	0.163	3.21E-15	Cycling M3 (M)	SLC39A8
GATM1	1.61E-19	0.331693908	0.327	0.104	3.88E-15	Cycling M3 (M)	GATM
SUPT16H	1.68E-19	0.285593298	0.632	0.299	4.03E-15	Cycling M3 (M)	SUPT16H
ACAT1	1.75E-19	0.295588721	0.497	0.209	4.20E-15	Cycling M3 (M)	ACAT1
RABL6	1.75E-19	0.284549715	0.526	0.224	4.21E-15	Cycling M3 (M)	RABL6
RHEB	1.95E-19	0.359273253	0.725	0.385	4.68E-15	Cycling M3 (M)	RHEB
RNPEP	2.25E-19	0.349866627	0.591	0.273	5.41E-15	Cycling M3 (M)	RNPEP
TMED9	4.13E-19	0.345862242	0.789	0.456	9.94E-15	Cycling M3 (M)	TMED9
COLEC121	4.45E-19	0.39735347	0.386	0.137	1.07E-14	Cycling M3 (M)	COLEC12
PDS5A	4.77E-19	0.268446891	0.538	0.23	1.15E-14	Cycling M3 (M)	PDS5A
HSPB11	4.90E-19	0.39925776	0.848	0.526	1.18E-14	Cycling M3 (M)	HSPB1
FRMD4A1	5.45E-19	0.290913217	0.538	0.229	1.31E-14	Cycling M3 (M)	FRMD4A
NFIC1	5.49E-19	0.327168718	0.673	0.331	1.32E-14	Cycling M3 (M)	NFIC
SLBP	5.81E-19	0.318982055	0.485	0.205	1.40E-14	Cycling M3 (M)	SLBP
GYPC1	1.00E-18	0.321624223	0.731	0.376	2.41E-14	Cycling M3 (M)	GYPC
CCL22	1.03E-18	0.471498466	0.474	0.19	2.48E-14	Cycling M3 (M)	CCL2
SH3GL1	1.05E-18	0.255805126	0.38	0.135	2.51E-14	Cycling M3 (M)	SH3GL1
PDIA41	1.08E-18	0.400737333	0.684	0.357	2.60E-14	Cycling M3 (M)	PDIA4
VKORC11	1.09E-18	0.268651929	0.655	0.308	2.62E-14	Cycling M3 (M)	VKORC1
HMGA11	1.22E-18	0.405075907	0.614	0.322	2.94E-14	Cycling M3 (M)	HMGA1
ADAM92	1.23E-18	0.391675897	0.637	0.307	2.95E-14	Cycling M3 (M)	ADAM9
TUBB61	1.23E-18	0.304603418	0.404	0.153	2.95E-14	Cycling M3 (M)	TUBB6
TMX1	1.23E-18	0.251844878	0.579	0.252	2.96E-14	Cycling M3 (M)	TMX1
MTCH2	1.23E-18	0.253645597	0.556	0.246	2.97E-14	Cycling M3 (M)	MTCH2
ALCAM1	1.51E-18	0.533728766	0.649	0.364	3.64E-14	Cycling M3 (M)	ALCAM
RCC2	1.63E-18	0.251252631	0.556	0.239	3.91E-14	Cycling M3 (M)	RCC2
COX20	1.84E-18	0.263408667	0.632	0.299	4.43E-14	Cycling M3 (M)	COX20
XPO1	1.87E-18	0.328749439	0.667	0.333	4.50E-14	Cycling M3 (M)	XPO1
PFN11	1.97E-18	0.310997719	0.994	0.893	4.74E-14	Cycling M3 (M)	PFN1
MAF1	2.28E-18	0.446367178	0.719	0.371	5.48E-14	Cycling M3 (M)	MAF
UQCRQ1	2.54E-18	0.361846338	0.86	0.568	6.10E-14	Cycling M3 (M)	UQCRQ
SLC25A5	2.62E-18	0.388861803	0.889	0.626	6.31E-14	Cycling M3 (M)	SLC25A5
IGFBP41	2.68E-18	0.541692104	0.304	0.102	6.44E-14	Cycling M3 (M)	IGFBP4
SNRPB	2.79E-18	0.297043613	0.795	0.456	6.70E-14	Cycling M3 (M)	SNRPB
PDS5B	2.86E-18	0.272904924	0.468	0.187	6.88E-14	Cycling M3 (M)	PDS5B
RPLP0	2.91E-18	0.305364034	0.988	0.855	7.00E-14	Cycling M3 (M)	RPLP0
TOMM401	3.23E-18	0.284443836	0.421	0.166	7.75E-14	Cycling M3 (M)	TOMM40
TTYH31	3.98E-18	0.382380619	0.678	0.36	9.58E-14	Cycling M3 (M)	TTYH3
HNRNPA3	4.80E-18	0.347413047	0.936	0.663	1.15E-13	Cycling M3 (M)	HNRNPA3
UQCC2	5.00E-18	0.261503526	0.538	0.24	1.20E-13	Cycling M3 (M)	UQCC2
ARHGDIA1	5.24E-18	0.371639592	0.825	0.513	1.26E-13	Cycling M3 (M)	ARHGDIA
CAPRIN1	6.07E-18	0.25216796	0.608	0.28	1.46E-13	Cycling M3 (M)	CAPRIN1
FADS1	6.26E-18	0.297469325	0.392	0.149	1.50E-13	Cycling M3 (M)	FADS1
CADM1	9.51E-18	0.268656488	0.515	0.218	2.29E-13	Cycling M3 (M)	CADM1
MS4A4A1	9.76E-18	0.315910137	0.871	0.482	2.34E-13	Cycling M3 (M)	MS4A4A
RIF1	1.01E-17	0.268526002	0.556	0.249	2.44E-13	Cycling M3 (M)	RIF1
TPD52L2	1.10E-17	0.273157177	0.585	0.268	2.63E-13	Cycling M3 (M)	TPD52L2
PBRM1	1.10E-17	0.330793577	0.702	0.372	2.65E-13	Cycling M3 (M)	PBRM1
MRC11	1.13E-17	0.473538202	0.643	0.311	2.71E-13	Cycling M3 (M)	MRC1
ADAP21	1.36E-17	0.355787242	0.889	0.531	3.28E-13	Cycling M3 (M)	ADAP2
LSM3	1.42E-17	0.320593083	0.667	0.354	3.41E-13	Cycling M3 (M)	LSM3
FGD5-AS1	1.67E-17	0.279508023	0.573	0.263	4.02E-13	Cycling M3 (M)	FGD5-AS1
SET	1.77E-17	0.301935984	0.918	0.611	4.25E-13	Cycling M3 (M)	SET
OGFRL11	2.28E-17	0.315130697	0.626	0.29	5.47E-13	Cycling M3 (M)	OGFRL1
ILF2	2.87E-17	0.287524521	0.567	0.269	6.89E-13	Cycling M3 (M)	ILF2
CBX3	3.18E-17	0.429572494	0.766	0.469	7.64E-13	Cycling M3 (M)	CBX3
RBMX	3.49E-17	0.372139454	0.778	0.439	8.40E-13	Cycling M3 (M)	RBMX
HSP90B12	3.68E-17	0.3854373	0.936	0.745	8.84E-13	Cycling M3 (M)	HSP90B1
CFL11	4.24E-17	0.287485184	1	0.906	1.02E-12	Cycling M3 (M)	CFL1
SOAT11	5.04E-17	0.277051699	0.684	0.35	1.21E-12	Cycling M3 (M)	SOAT1
PTGES3	5.05E-17	0.362244274	0.895	0.61	1.21E-12	Cycling M3 (M)	PTGES3
EIF4G11	6.85E-17	0.353648822	0.678	0.373	1.65E-12	Cycling M3 (M)	EIF4G1
IRAK11	9.99E-17	0.298748306	0.602	0.297	2.40E-12	Cycling M3 (M)	IRAK1
GALNT11	1.10E-16	0.38147663	0.608	0.305	2.65E-12	Cycling M3 (M)	GALNT1
FAM198B1	1.11E-16	0.315495611	0.485	0.211	2.68E-12	Cycling M3 (M)	FAM198B
KDELR21	1.60E-16	0.307628609	0.684	0.373	3.85E-12	Cycling M3 (M)	KDELR2
TMEM14C	1.61E-16	0.321443594	0.649	0.334	3.87E-12	Cycling M3 (M)	TMEM14C
COQ2	1.66E-16	0.279600803	0.363	0.143	3.98E-12	Cycling M3 (M)	COQ2
KIAA09301	2.79E-16	0.282588456	0.643	0.329	6.70E-12	Cycling M3 (M)	KIAA0930
MAPRE1	3.12E-16	0.267803527	0.661	0.335	7.51E-12	Cycling M3 (M)	MAPRE1
IL1RN2	3.18E-16	0.46155408	0.602	0.3	7.64E-12	Cycling M3 (M)	IL1RN
PPP2CA	3.26E-16	0.290870655	0.608	0.298	7.84E-12	Cycling M3 (M)	PPP2CA
SERBP1	3.42E-16	0.361002399	0.924	0.711	8.22E-12	Cycling M3 (M)	SERBP1
GPR341	3.49E-16	0.302005686	0.462	0.192	8.38E-12	Cycling M3 (M)	GPR34
CYB5R3	3.73E-16	0.27080865	0.579	0.282	8.97E-12	Cycling M3 (M)	CYB5R3
PSMD14	3.90E-16	0.348684732	0.684	0.373	9.37E-12	Cycling M3 (M)	PSMD14
EIF1AX	4.15E-16	0.340435828	0.76	0.498	9.98E-12	Cycling M3 (M)	EIF1AX
PTBP1	4.25E-16	0.27120604	0.637	0.324	1.02E-11	Cycling M3 (M)	PTBP1
CENPB	5.38E-16	0.253633093	0.363	0.14	1.29E-11	Cycling M3 (M)	CENPB
SHISA5	6.22E-16	0.276723924	0.585	0.278	1.50E-11	Cycling M3 (M)	SHISA5
APPL1	7.05E-16	0.289641899	0.655	0.337	1.69E-11	Cycling M3 (M)	APPL1
BCAT12	8.43E-16	0.281125837	0.561	0.272	2.03E-11	Cycling M3 (M)	BCAT1
MFSD121	9.97E-16	0.361415325	0.614	0.335	2.40E-11	Cycling M3 (M)	MFSD12
SPCS3	1.03E-15	0.293199123	0.778	0.438	2.48E-11	Cycling M3 (M)	SPCS3
MDH1	1.06E-15	0.307258101	0.69	0.394	2.54E-11	Cycling M3 (M)	MDH1
ITSN11	1.43E-15	0.290943863	0.444	0.187	3.43E-11	Cycling M3 (M)	ITSN1
HMGN1	1.73E-15	0.288305775	0.883	0.598	4.17E-11	Cycling M3 (M)	HMGN1
KHDRBS1	2.03E-15	0.252029148	0.749	0.417	4.88E-11	Cycling M3 (M)	KHDRBS1
ATP2A21	2.38E-15	0.279229154	0.626	0.32	5.73E-11	Cycling M3 (M)	ATP2A2
ELOC1	2.38E-15	0.316173992	0.649	0.353	5.73E-11	Cycling M3 (M)	ELOC
PTMS1	2.59E-15	0.383426068	0.784	0.474	6.22E-11	Cycling M3 (M)	PTMS
FUCA2	2.76E-15	0.251944883	0.579	0.287	6.63E-11	Cycling M3 (M)	FUCA2
PLAU1	3.54E-15	0.344560113	0.561	0.269	8.51E-11	Cycling M3 (M)	PLAU
HNRNPA2B1	3.83E-15	0.308379662	0.982	0.847	9.19E-11	Cycling M3 (M)	HNRNPA2B1
ARHGAP41	4.90E-15	0.352823016	0.585	0.292	1.18E-10	Cycling M3 (M)	ARHGAP4
NUP62	5.16E-15	0.313011182	0.596	0.308	1.24E-10	Cycling M3 (M)	NUP62
CEP350	5.76E-15	0.336749469	0.725	0.397	1.38E-10	Cycling M3 (M)	CEP350
RPN2	6.71E-15	0.31912657	0.807	0.521	1.61E-10	Cycling M3 (M)	RPN2
HAMP1	7.47E-15	0.472767485	0.544	0.283	1.80E-10	Cycling M3 (M)	HAMP
GAPDH1	8.30E-15	0.322642222	0.982	0.907	2.00E-10	Cycling M3 (M)	GAPDH
RAD23A	1.31E-14	0.254796425	0.673	0.354	3.15E-10	Cycling M3 (M)	RAD23A
HP1BP3	1.41E-14	0.350115759	0.725	0.435	3.38E-10	Cycling M3 (M)	HP1BP3
GLIPR1	1.58E-14	0.282592728	0.807	0.462	3.79E-10	Cycling M3 (M)	GLIPR1
RAB311	1.96E-14	0.331418486	0.83	0.517	4.72E-10	Cycling M3 (M)	RAB31
RPN11	2.33E-14	0.298513181	0.661	0.364	5.59E-10	Cycling M3 (M)	RPN1
EIF5B	2.36E-14	0.305172295	0.772	0.498	5.68E-10	Cycling M3 (M)	EIF5B
PPM1G	2.37E-14	0.251674362	0.573	0.301	5.68E-10	Cycling M3 (M)	PPM1G
HNRNPUL1	2.64E-14	0.251796492	0.667	0.363	6.33E-10	Cycling M3 (M)	HNRNPUL1
IDH11	3.46E-14	0.256051334	0.649	0.329	8.31E-10	Cycling M3 (M)	IDH1
NAGA1	3.89E-14	0.278001589	0.614	0.314	9.36E-10	Cycling M3 (M)	NAGA
CCT6A	4.84E-14	0.263119683	0.661	0.375	1.16E-09	Cycling M3 (M)	CCT6A
CLTC1	4.98E-14	0.435664972	0.784	0.508	1.20E-09	Cycling M3 (M)	CLTC
PLTP1	9.00E-14	0.435990433	0.807	0.468	2.16E-09	Cycling M3 (M)	PLTP
HINT1	9.74E-14	0.306809355	0.807	0.604	2.34E-09	Cycling M3 (M)	HINT1
COX5A	1.14E-13	0.303140167	0.778	0.533	2.74E-09	Cycling M3 (M)	COX5A
PMP221	1.16E-13	0.329822132	0.573	0.289	2.79E-09	Cycling M3 (M)	PMP22
LGMN2	1.21E-13	0.269828601	0.924	0.64	2.90E-09	Cycling M3 (M)	LGMN
SSR3	1.56E-13	0.307919674	0.825	0.553	3.75E-09	Cycling M3 (M)	SSR3
VPS29	2.02E-13	0.294278698	0.743	0.448	4.85E-09	Cycling M3 (M)	VPS29
PDIA61	2.05E-13	0.309115341	0.836	0.573	4.92E-09	Cycling M3 (M)	PDIA6
MESD	2.19E-13	0.259912307	0.649	0.352	5.27E-09	Cycling M3 (M)	MESD
MMP91	2.28E-13	1.158204518	0.363	0.168	5.48E-09	Cycling M3 (M)	MMP9
FSCN1	3.10E-13	0.288195072	0.269	0.098	7.44E-09	Cycling M3 (M)	FSCN1
MYO5A1	3.87E-13	0.250764902	0.602	0.316	9.30E-09	Cycling M3 (M)	MYO5A
AP1B11	3.96E-13	0.29054268	0.749	0.444	9.53E-09	Cycling M3 (M)	AP1B1
SYK1	4.24E-13	0.274455898	0.708	0.402	1.02E-08	Cycling M3 (M)	SYK
ENO11	5.10E-13	0.374204032	0.93	0.753	1.23E-08	Cycling M3 (M)	ENO1
HSPA8	5.85E-13	0.31370672	0.953	0.808	1.40E-08	Cycling M3 (M)	HSPA8
FABP51	5.89E-13	0.811048537	0.678	0.525	1.42E-08	Cycling M3 (M)	FABP5
CD931	6.03E-13	0.301699846	0.415	0.187	1.45E-08	Cycling M3 (M)	CD93
PCBP2	7.18E-13	0.280520888	0.86	0.604	1.73E-08	Cycling M3 (M)	PCBP2
CTSB1	8.10E-13	0.413595611	0.994	0.819	1.95E-08	Cycling M3 (M)	CTSB
IL17RA	8.93E-13	0.269395023	0.544	0.281	2.15E-08	Cycling M3 (M)	IL17RA
SYNCRIP	9.09E-13	0.286561695	0.678	0.414	2.18E-08	Cycling M3 (M)	SYNCRIP
APLP22	9.84E-13	0.309156761	0.912	0.702	2.37E-08	Cycling M3 (M)	APLP2
NENF	1.00E-12	0.261228405	0.602	0.324	2.41E-08	Cycling M3 (M)	NENF
COLGALT11	1.03E-12	0.305544986	0.632	0.363	2.47E-08	Cycling M3 (M)	COLGALT1
CRTAP	1.28E-12	0.267212201	0.69	0.395	3.08E-08	Cycling M3 (M)	CRTAP
SELENOP1	1.30E-12	0.398166434	0.532	0.278	3.12E-08	Cycling M3 (M)	SELENOP
CAPZA1	1.33E-12	0.297804624	0.854	0.546	3.21E-08	Cycling M3 (M)	CAPZA1
SFPQ	1.59E-12	0.263139578	0.842	0.572	3.82E-08	Cycling M3 (M)	SFPQ
CORO1C1	1.99E-12	0.278128846	0.673	0.39	4.78E-08	Cycling M3 (M)	CORO1C
HSPE1	2.03E-12	0.260845832	0.789	0.526	4.88E-08	Cycling M3 (M)	HSPE1
CD1631	2.10E-12	0.252515208	0.86	0.497	5.05E-08	Cycling M3 (M)	CD163
MT-ATP8	2.19E-12	0.287093651	0.772	0.481	5.27E-08	Cycling M3 (M)	MT-ATP8
TIMP22	2.24E-12	0.272882247	0.877	0.616	5.39E-08	Cycling M3 (M)	TIMP2
BMP2K1	2.40E-12	0.266284589	0.801	0.492	5.76E-08	Cycling M3 (M)	BMP2K
FAM96A	2.60E-12	0.313376785	0.608	0.345	6.26E-08	Cycling M3 (M)	FAM96A
ATP5MF	3.34E-12	0.270561615	0.86	0.598	8.04E-08	Cycling M3 (M)	ATP5MF
CALR1	4.04E-12	0.307611451	0.942	0.764	9.72E-08	Cycling M3 (M)	CALR
F13A11	5.82E-12	0.768274884	0.444	0.233	1.40E-07	Cycling M3 (M)	F13A1
PKM1	6.00E-12	0.308440355	0.924	0.677	1.44E-07	Cycling M3 (M)	PKM
BIN11	6.31E-12	0.302253734	0.327	0.138	1.52E-07	Cycling M3 (M)	BIN1
RAC11	7.83E-12	0.290149962	0.959	0.771	1.88E-07	Cycling M3 (M)	RAC1
EIF2S2	1.12E-11	0.318001588	0.836	0.579	2.70E-07	Cycling M3 (M)	EIF2S2
DUSP31	1.51E-11	0.251728656	0.526	0.278	3.64E-07	Cycling M3 (M)	DUSP3
NCL	1.54E-11	0.269169473	0.877	0.701	3.71E-07	Cycling M3 (M)	NCL
CANX2	1.57E-11	0.281174986	0.883	0.635	3.78E-07	Cycling M3 (M)	CANX
FKBP1A	2.45E-11	0.319501501	0.749	0.497	5.88E-07	Cycling M3 (M)	FKBP1A
PLXND11	2.68E-11	0.261620536	0.649	0.376	6.45E-07	Cycling M3 (M)	PLXND1
MKNK11	2.77E-11	0.302756966	0.509	0.269	6.66E-07	Cycling M3 (M)	MKNK1
NRIP11	3.84E-11	0.263503434	0.585	0.331	9.23E-07	Cycling M3 (M)	NRIP1
MEF2C1	4.77E-11	0.325807795	0.678	0.399	1.15E-06	Cycling M3 (M)	MEF2C
TAGLN21	5.43E-11	0.256404751	0.836	0.63	1.31E-06	Cycling M3 (M)	TAGLN2
NPC22	5.94E-11	0.276206296	0.988	0.819	1.43E-06	Cycling M3 (M)	NPC2
NDUFC2	1.09E-10	0.256671301	0.591	0.344	2.61E-06	Cycling M3 (M)	NDUFC2
SNX21	1.21E-10	0.27842755	0.784	0.489	2.90E-06	Cycling M3 (M)	SNX2
PGK11	1.23E-10	0.261602085	0.836	0.625	2.95E-06	Cycling M3 (M)	PGK1
DBI2	1.23E-10	0.350632069	0.889	0.694	2.97E-06	Cycling M3 (M)	DBI
A2M1	1.45E-10	0.274338729	0.889	0.574	3.48E-06	Cycling M3 (M)	A2M
RMDN31	1.54E-10	0.292431922	0.515	0.289	3.71E-06	Cycling M3 (M)	RMDN3
ATP5MC31	2.84E-10	0.320545174	0.76	0.582	6.82E-06	Cycling M3 (M)	ATP5MC3
CD164	3.47E-10	0.256959489	0.789	0.54	8.34E-06	Cycling M3 (M)	CD164
C6orf621	3.80E-10	0.262552667	0.795	0.506	9.13E-06	Cycling M3 (M)	C6orf62
ARPC4	4.95E-10	0.250557724	0.83	0.569	1.19E-05	Cycling M3 (M)	ARPC4
ATP6V0D11	5.08E-10	0.250607671	0.795	0.528	1.22E-05	Cycling M3 (M)	ATP6V0D1
PLA2G71	5.69E-10	0.363210284	0.515	0.296	1.37E-05	Cycling M3 (M)	PLA2G7
KCTD121	9.91E-10	0.295695617	0.854	0.58	2.38E-05	Cycling M3 (M)	KCTD12
TREM22	1.80E-09	0.313840765	0.708	0.486	4.33E-05	Cycling M3 (M)	TREM2
ATP6V1B21	1.89E-09	0.251325027	0.708	0.468	4.54E-05	Cycling M3 (M)	ATP6V1B2
WWP11	2.00E-09	0.264701847	0.421	0.219	4.80E-05	Cycling M3 (M)	WWP1
ANXA22	2.88E-09	0.330665069	0.901	0.771	6.93E-05	Cycling M3 (M)	ANXA2
NCEH11	3.67E-09	0.259469044	0.532	0.319	8.82E-05	Cycling M3 (M)	NCEH1
BCAP311	3.81E-09	0.269462336	0.725	0.505	9.16E-05	Cycling M3 (M)	BCAP31
CD2091	4.58E-09	0.389146876	0.281	0.129	0.000110027	Cycling M3 (M)	CD209
FOLR21	6.26E-09	0.422545657	0.509	0.314	0.00015056	Cycling M3 (M)	FOLR2
LGALS11	9.49E-09	0.357592723	0.871	0.813	0.000228073	Cycling M3 (M)	LGALS1
PYGL1	1.67E-08	0.274476959	0.392	0.206	0.000401531	Cycling M3 (M)	PYGL
RBPJ1	2.86E-08	0.284553591	0.865	0.586	0.000687278	Cycling M3 (M)	RBPJ
PDXK1	9.27E-08	0.255136627	0.678	0.478	0.002227432	Cycling M3 (M)	PDXK
EGR11	1.11E-06	0.325474196	0.737	0.522	0.026728415	Cycling M3 (M)	EGR1
CHI3L12	2.82E-06	0.914696325	0.339	0.206	0.067886849	Cycling M3 (M)	CHI3L1
CSTB1	0.00183463	0.303354187	0.836	0.747	1	Cycling M3 (M)	CSTB
DNASE1L3	0	1.154061334	0.274	0.008	0	Dendritic Cell 1 (M)	DNASE1L3
IDO1	1.83E-202	1.604862639	0.64	0.101	4.41E-198	Dendritic Cell 1 (M)	IDO1
LGALS2	1.40E-186	1.115140372	0.473	0.057	3.36E-182	Dendritic Cell 1 (M)	LGALS2
MARCKSL1	5.15E-177	1.566953085	0.572	0.091	1.24E-172	Dendritic Cell 1 (M)	MARCKSL1
DUSP4	2.22E-166	1.075762689	0.428	0.051	5.32E-162	Dendritic Cell 1 (M)	DUSP4
LAMP3	2.27E-153	1.036214243	0.322	0.032	5.46E-149	Dendritic Cell 1 (M)	LAMP3
BATF3	3.25E-134	0.747300828	0.308	0.033	7.81E-130	Dendritic Cell 1 (M)	BATF3
S100B	5.29E-126	1.499076087	0.267	0.027	1.27E-121	Dendritic Cell 1 (M)	S100B
PPA1	6.14E-108	1.385743329	0.805	0.348	1.48E-103	Dendritic Cell 1 (M)	PPA1
TMSB101	1.06E-97	0.755499029	0.99	0.982	2.54E-93	Dendritic Cell 1 (M)	TMSB10
HLA-DPA11	6.15E-93	1.037736361	0.979	0.792	1.48E-88	Dendritic Cell 1 (M)	HLA-DPA1
HLA-DPB11	9.21E-89	1.207678828	0.979	0.791	2.21E-84	Dendritic Cell 1 (M)	HLA-DPB1
HLA-DRA1	1.01E-76	0.769101904	0.997	0.838	2.42E-72	Dendritic Cell 1 (M)	HLA-DRA
HLA-DQB11	2.56E-73	0.852163803	0.979	0.734	6.15E-69	Dendritic Cell 1 (M)	HLA-DQB1
HLA-DQA11	1.24E-64	0.82214649	0.973	0.743	2.99E-60	Dendritic Cell 1 (M)	HLA-DQA1
ACTB2	1.96E-64	0.694560612	0.99	0.984	4.72E-60	Dendritic Cell 1 (M)	ACTB
SLAMF71	1.92E-63	0.772203838	0.771	0.345	4.61E-59	Dendritic Cell 1 (M)	SLAMF7
CST31	5.19E-58	1.639886657	0.969	0.834	1.25E-53	Dendritic Cell 1 (M)	CST3
HLA-DRB11	6.06E-58	0.786355732	0.976	0.815	1.46E-53	Dendritic Cell 1 (M)	HLA-DRB1
LSP11	7.25E-53	0.856250104	0.818	0.533	1.74E-48	Dendritic Cell 1 (M)	LSP1
EEF1A1	8.23E-52	0.50641775	0.993	0.996	1.98E-47	Dendritic Cell 1 (M)	EEF1A1
RPL8	8.57E-52	0.502874129	0.973	0.949	2.06E-47	Dendritic Cell 1 (M)	RPL8
ACTG11	1.07E-51	0.729489152	0.969	0.932	2.57E-47	Dendritic Cell 1 (M)	ACTG1
BASP11	1.72E-51	1.183675935	0.733	0.456	4.14E-47	Dendritic Cell 1 (M)	BASP1
CSF2RA	5.37E-50	0.799879871	0.647	0.321	1.29E-45	Dendritic Cell 1 (M)	CSF2RA
WDFY4	2.20E-47	1.018835693	0.418	0.15	5.29E-43	Dendritic Cell 1 (M)	WDFY4
GABARAPL2	2.51E-46	0.839953477	0.678	0.378	6.03E-42	Dendritic Cell 1 (M)	GABARAPL2
TMSB4X	4.40E-46	0.531538845	0.993	0.991	1.06E-41	Dendritic Cell 1 (M)	TMSB4X
RPL18A	6.90E-46	0.523846807	0.976	0.947	1.66E-41	Dendritic Cell 1 (M)	RPL18A
RPS16	7.21E-45	0.44814148	0.986	0.94	1.73E-40	Dendritic Cell 1 (M)	RPS16
RPS24	3.06E-44	0.433641064	0.986	0.976	7.36E-40	Dendritic Cell 1 (M)	RPS24
FGL21	3.23E-44	0.811341669	0.801	0.54	7.75E-40	Dendritic Cell 1 (M)	FGL2
DAPP1	4.36E-44	0.783679676	0.531	0.236	1.05E-39	Dendritic Cell 1 (M)	DAPP1
RGS10	1.21E-43	0.668695564	0.839	0.62	2.92E-39	Dendritic Cell 1 (M)	RGS10
IRF8	1.32E-43	1.189409284	0.664	0.413	3.18E-39	Dendritic Cell 1 (M)	IRF8
RPL10	1.61E-43	0.432572814	0.979	0.987	3.88E-39	Dendritic Cell 1 (M)	RPL10
SULF2	7.44E-43	0.405874996	0.26	0.063	1.79E-38	Dendritic Cell 1 (M)	SULF2
MCOLN2	1.89E-42	0.47400828	0.305	0.085	4.55E-38	Dendritic Cell 1 (M)	MCOLN2
CD742	8.10E-42	0.508233516	1	0.877	1.95E-37	Dendritic Cell 1 (M)	CD74
RHOF	2.13E-40	0.383936643	0.26	0.063	5.12E-36	Dendritic Cell 1 (M)	RHOF
SUB1	1.09E-39	0.778907186	0.771	0.588	2.61E-35	Dendritic Cell 1 (M)	SUB1
RPS23	2.62E-39	0.5003922	0.966	0.958	6.30E-35	Dendritic Cell 1 (M)	RPS23
RPL21	3.87E-38	0.46743141	0.962	0.944	9.31E-34	Dendritic Cell 1 (M)	RPL21
PSME21	1.78E-37	0.604829239	0.86	0.616	4.28E-33	Dendritic Cell 1 (M)	PSME2
C1orf54	2.28E-37	1.039370556	0.493	0.24	5.48E-33	Dendritic Cell 1 (M)	C1orf54
NAP1L11	3.42E-37	0.647786519	0.873	0.677	8.21E-33	Dendritic Cell 1 (M)	NAP1L1
RPL28	4.53E-37	0.331661212	0.986	0.988	1.09E-32	Dendritic Cell 1 (M)	RPL28
RPS2	4.73E-37	0.393783482	0.99	0.978	1.14E-32	Dendritic Cell 1 (M)	RPS2
UBA52	1.25E-36	0.397910357	0.969	0.933	3.01E-32	Dendritic Cell 1 (M)	UBA52
RPL37	1.60E-36	0.454892802	0.955	0.966	3.84E-32	Dendritic Cell 1 (M)	RPL37
ISG20	1.95E-36	0.533634103	0.452	0.176	4.68E-32	Dendritic Cell 1 (M)	ISG20
RPLP2	3.07E-36	0.360333246	0.976	0.96	7.37E-32	Dendritic Cell 1 (M)	RPLP2
RPS27	3.05E-35	0.392589309	0.983	0.982	7.33E-31	Dendritic Cell 1 (M)	RPS27
CCND12	3.69E-35	1.009807559	0.339	0.122	8.87E-31	Dendritic Cell 1 (M)	CCND1
ID2	9.41E-35	0.894267768	0.767	0.607	2.26E-30	Dendritic Cell 1 (M)	ID2
RPL14	1.43E-34	0.39012813	0.976	0.9	3.44E-30	Dendritic Cell 1 (M)	RPL14
RPL11	1.76E-34	0.36755877	0.979	0.968	4.22E-30	Dendritic Cell 1 (M)	RPL11
TRAF1	3.64E-34	0.604241435	0.308	0.099	8.75E-30	Dendritic Cell 1 (M)	TRAF1
RPL22	6.90E-34	0.456807156	0.949	0.904	1.66E-29	Dendritic Cell 1 (M)	RPL22
IFI301	7.62E-34	0.713502467	0.521	0.258	1.83E-29	Dendritic Cell 1 (M)	IFI30
WARS1	2.03E-33	0.630140273	0.668	0.374	4.88E-29	Dendritic Cell 1 (M)	WARS
RPL39	2.13E-33	0.33450328	0.973	0.973	5.13E-29	Dendritic Cell 1 (M)	RPL39
RPL4	4.25E-33	0.462003819	0.901	0.774	1.02E-28	Dendritic Cell 1 (M)	RPL4
LMNB11	9.20E-33	0.395028161	0.329	0.111	2.21E-28	Dendritic Cell 1 (M)	LMNB1
RPS9	1.58E-32	0.353906125	0.986	0.945	3.79E-28	Dendritic Cell 1 (M)	RPS9
UVRAG	1.86E-32	0.494457509	0.476	0.217	4.46E-28	Dendritic Cell 1 (M)	UVRAG
SERPINB9	2.16E-32	0.665987671	0.555	0.28	5.20E-28	Dendritic Cell 1 (M)	SERPINB9
RPS11	1.42E-31	0.437802658	0.955	0.918	3.42E-27	Dendritic Cell 1 (M)	RPS11
CNN2	1.94E-31	0.517072915	0.466	0.209	4.66E-27	Dendritic Cell 1 (M)	CNN2
ETV6	2.86E-31	0.479834265	0.555	0.284	6.86E-27	Dendritic Cell 1 (M)	ETV6
LCP1	4.42E-31	0.510379689	0.89	0.749	1.06E-26	Dendritic Cell 1 (M)	LCP1
RPS15	6.49E-31	0.356691644	0.99	0.957	1.56E-26	Dendritic Cell 1 (M)	RPS15
RPS3A	8.28E-31	0.425134748	0.966	0.934	1.99E-26	Dendritic Cell 1 (M)	RPS3A
RPS28	9.79E-31	0.337924193	0.983	0.98	2.35E-26	Dendritic Cell 1 (M)	RPS28
FNBP1	1.53E-30	0.622999559	0.699	0.478	3.67E-26	Dendritic Cell 1 (M)	FNBP1
RPL19	1.54E-30	0.33739946	0.976	0.964	3.70E-26	Dendritic Cell 1 (M)	RPL19
RPS13	1.70E-30	0.409825728	0.983	0.93	4.09E-26	Dendritic Cell 1 (M)	RPS13
RPS29	7.22E-30	0.457987883	0.979	0.983	1.74E-25	Dendritic Cell 1 (M)	RPS29
RAB11FIP1	7.50E-30	0.717558095	0.531	0.295	1.80E-25	Dendritic Cell 1 (M)	RAB11FIP1
RPS18	1.40E-29	0.368465328	0.983	0.972	3.36E-25	Dendritic Cell 1 (M)	RPS18
RUFY3	1.71E-29	0.578311592	0.49	0.244	4.10E-25	Dendritic Cell 1 (M)	RUFY3
DUSP5	2.15E-29	0.520443928	0.264	0.083	5.16E-25	Dendritic Cell 1 (M)	DUSP5
PTMA1	8.00E-29	0.317936555	0.979	0.967	1.92E-24	Dendritic Cell 1 (M)	PTMA
RPL35A	1.91E-28	0.362886248	0.959	0.918	4.58E-24	Dendritic Cell 1 (M)	RPL35A
PLEKHO11	2.02E-28	0.609304133	0.76	0.539	4.86E-24	Dendritic Cell 1 (M)	PLEKHO1
RPS14	2.76E-28	0.336395502	0.973	0.973	6.63E-24	Dendritic Cell 1 (M)	RPS14
PTPRE1	3.69E-28	0.699702057	0.678	0.476	8.87E-24	Dendritic Cell 1 (M)	PTPRE
SINHCAF	3.88E-28	0.390053722	0.332	0.125	9.32E-24	Dendritic Cell 1 (M)	SINHCAF
RPL41	9.00E-28	0.274484401	0.983	0.989	2.16E-23	Dendritic Cell 1 (M)	RPL41
RPL26	1.07E-27	0.413370247	0.949	0.882	2.57E-23	Dendritic Cell 1 (M)	RPL26
COTL1	1.21E-27	0.405776686	0.884	0.74	2.90E-23	Dendritic Cell 1 (M)	COTL1
RPS8	1.80E-27	0.372414591	0.973	0.959	4.33E-23	Dendritic Cell 1 (M)	RPS8
TXN	1.93E-27	1.616017803	0.764	0.599	4.63E-23	Dendritic Cell 1 (M)	TXN
RPS12	2.80E-27	0.28774384	0.99	0.975	6.72E-23	Dendritic Cell 1 (M)	RPS12
RPS6	5.88E-27	0.334193712	0.969	0.949	1.41E-22	Dendritic Cell 1 (M)	RPS6
DYNC1LI1	9.87E-27	0.61124885	0.545	0.312	2.37E-22	Dendritic Cell 1 (M)	DYNC1LI1
RPL35	1.23E-26	0.301394837	0.973	0.94	2.96E-22	Dendritic Cell 1 (M)	RPL35
GSTP1	1.37E-26	0.564809061	0.87	0.745	3.30E-22	Dendritic Cell 1 (M)	GSTP1
NUB1	1.71E-26	0.841559882	0.62	0.405	4.11E-22	Dendritic Cell 1 (M)	NUB1
RPS5	1.96E-26	0.344813065	0.935	0.859	4.71E-22	Dendritic Cell 1 (M)	RPS5
RPL36	2.11E-26	0.330854409	0.973	0.95	5.08E-22	Dendritic Cell 1 (M)	RPL36
CD832	3.45E-26	0.531706812	0.918	0.735	8.30E-22	Dendritic Cell 1 (M)	CD83
PAK1	4.26E-26	0.53198447	0.527	0.3	1.03E-21	Dendritic Cell 1 (M)	PAK1
RPL5	7.34E-26	0.376335659	0.942	0.904	1.76E-21	Dendritic Cell 1 (M)	RPL5
PSMB9	1.19E-25	0.455621787	0.764	0.541	2.86E-21	Dendritic Cell 1 (M)	PSMB9
RPL32	1.33E-25	0.314778865	0.955	0.969	3.21E-21	Dendritic Cell 1 (M)	RPL32
RPL10A	1.54E-25	0.346867511	0.938	0.854	3.71E-21	Dendritic Cell 1 (M)	RPL10A
RPL30	1.81E-25	0.315549166	0.962	0.943	4.35E-21	Dendritic Cell 1 (M)	RPL30
PSME1	1.93E-25	0.441657843	0.832	0.672	4.63E-21	Dendritic Cell 1 (M)	PSME1
RPS27A	2.11E-25	0.2783776	0.973	0.962	5.06E-21	Dendritic Cell 1 (M)	RPS27A
RPL24	1.86E-24	0.304320579	0.938	0.874	4.46E-20	Dendritic Cell 1 (M)	RPL24
RPL34	2.34E-24	0.319027644	0.986	0.972	5.62E-20	Dendritic Cell 1 (M)	RPL34
RPL9	4.47E-24	0.288868706	0.966	0.94	1.07E-19	Dendritic Cell 1 (M)	RPL9
FAU	5.06E-24	0.300472809	0.959	0.933	1.21E-19	Dendritic Cell 1 (M)	FAU
RPLP1	5.61E-24	0.294565846	0.99	0.992	1.35E-19	Dendritic Cell 1 (M)	RPLP1
NAAA	7.84E-24	0.727504159	0.373	0.182	1.88E-19	Dendritic Cell 1 (M)	NAAA
RPL37A	1.05E-23	0.289027316	0.966	0.969	2.51E-19	Dendritic Cell 1 (M)	RPL37A
RPL18	1.45E-23	0.299545718	0.955	0.93	3.48E-19	Dendritic Cell 1 (M)	RPL18
TAP1	2.78E-23	0.515555853	0.634	0.414	6.69E-19	Dendritic Cell 1 (M)	TAP1
RPS21	3.38E-23	0.359334353	0.938	0.883	8.13E-19	Dendritic Cell 1 (M)	RPS21
CXCL91	5.48E-23	0.67083817	0.61	0.326	1.32E-18	Dendritic Cell 1 (M)	CXCL9
C12orf45	7.10E-23	0.589791992	0.26	0.098	1.71E-18	Dendritic Cell 1 (M)	C12orf45
CYTIP	7.46E-23	0.38435713	0.51	0.264	1.79E-18	Dendritic Cell 1 (M)	CYTIP
LRRK21	7.65E-23	0.533990855	0.425	0.214	1.84E-18	Dendritic Cell 1 (M)	LRRK2
HAPLN3	1.06E-22	0.378765151	0.301	0.121	2.56E-18	Dendritic Cell 1 (M)	HAPLN3
VAMP51	1.34E-22	0.580498974	0.705	0.465	3.22E-18	Dendritic Cell 1 (M)	VAMP5
NAV1	1.61E-22	0.395200917	0.318	0.132	3.88E-18	Dendritic Cell 1 (M)	NAV1
SHTN1	2.02E-22	0.664501032	0.565	0.39	4.85E-18	Dendritic Cell 1 (M)	SHTN1
PLEK1	5.75E-22	0.365599569	0.901	0.711	1.38E-17	Dendritic Cell 1 (M)	PLEK
BIRC3	1.01E-21	0.991953577	0.592	0.379	2.43E-17	Dendritic Cell 1 (M)	BIRC3
MALAT1	1.10E-21	0.327049552	1	0.997	2.64E-17	Dendritic Cell 1 (M)	MALAT1
TUBA1A	1.17E-21	0.568061438	0.733	0.532	2.82E-17	Dendritic Cell 1 (M)	TUBA1A
CD401	1.19E-21	0.747486261	0.49	0.292	2.86E-17	Dendritic Cell 1 (M)	CD40
ACTR3	1.20E-21	0.380869662	0.842	0.683	2.90E-17	Dendritic Cell 1 (M)	ACTR3
SLC25A6	1.66E-21	0.398600192	0.866	0.709	3.99E-17	Dendritic Cell 1 (M)	SLC25A6
RPS7	2.61E-21	0.299467168	0.938	0.909	6.28E-17	Dendritic Cell 1 (M)	RPS7
KIF2A	2.99E-21	0.707659172	0.342	0.159	7.20E-17	Dendritic Cell 1 (M)	KIF2A
EEF1B2	3.47E-21	0.483324669	0.863	0.79	8.34E-17	Dendritic Cell 1 (M)	EEF1B2
RPS4X	3.55E-21	0.297317274	0.969	0.956	8.54E-17	Dendritic Cell 1 (M)	RPS4X
UPF2	5.07E-21	0.518087855	0.49	0.278	1.22E-16	Dendritic Cell 1 (M)	UPF2
ATP5F1E	5.62E-21	0.284448411	0.986	0.959	1.35E-16	Dendritic Cell 1 (M)	ATP5F1E
DPYSL21	8.58E-21	0.49160546	0.712	0.548	2.06E-16	Dendritic Cell 1 (M)	DPYSL2
SERPINB1	9.28E-21	0.761515672	0.675	0.508	2.23E-16	Dendritic Cell 1 (M)	SERPINB1
GSN2	1.26E-20	0.482082893	0.736	0.546	3.02E-16	Dendritic Cell 1 (M)	GSN
SLC1A5	5.04E-20	0.329045449	0.363	0.168	1.21E-15	Dendritic Cell 1 (M)	SLC1A5
SERPINF1	6.46E-20	0.543919312	0.459	0.255	1.55E-15	Dendritic Cell 1 (M)	SERPINF1
RPL27	8.65E-20	0.317510022	0.925	0.86	2.08E-15	Dendritic Cell 1 (M)	RPL27
C15orf481	1.12E-19	0.800074966	0.716	0.523	2.68E-15	Dendritic Cell 1 (M)	C15orf48
LIMD2	5.07E-19	0.369640363	0.575	0.368	1.22E-14	Dendritic Cell 1 (M)	LIMD2
PFN12	5.37E-19	0.326457451	0.962	0.892	1.29E-14	Dendritic Cell 1 (M)	PFN1
MAP3K13	1.21E-18	0.418149703	0.277	0.119	2.91E-14	Dendritic Cell 1 (M)	MAP3K13
RELB	1.23E-18	0.415268923	0.373	0.187	2.96E-14	Dendritic Cell 1 (M)	RELB
CIITA1	2.13E-18	0.452863819	0.606	0.414	5.12E-14	Dendritic Cell 1 (M)	CIITA
BAZ1A	2.66E-18	0.433623671	0.654	0.452	6.40E-14	Dendritic Cell 1 (M)	BAZ1A
RPS25	2.75E-18	0.260062894	0.945	0.922	6.61E-14	Dendritic Cell 1 (M)	RPS25
REPIN1	3.08E-18	0.41673185	0.322	0.154	7.39E-14	Dendritic Cell 1 (M)	REPIN1
6-Sep	3.49E-18	0.398004693	0.493	0.303	8.38E-14	Dendritic Cell 1 (M)	6-Sep
CAMK2D	4.39E-18	0.420578363	0.37	0.19	1.05E-13	Dendritic Cell 1 (M)	CAMK2D
RFTN1	5.60E-18	0.360774075	0.318	0.148	1.34E-13	Dendritic Cell 1 (M)	RFTN1
FOXN2	8.51E-18	0.349490309	0.38	0.194	2.04E-13	Dendritic Cell 1 (M)	FOXN2
H3F3B	8.56E-18	0.315721141	0.966	0.925	2.06E-13	Dendritic Cell 1 (M)	H3F3B
PTPN2	9.64E-18	0.427440345	0.545	0.357	2.32E-13	Dendritic Cell 1 (M)	PTPN2
ARPC2	9.79E-18	0.314239603	0.908	0.857	2.35E-13	Dendritic Cell 1 (M)	ARPC2
VRK2	1.43E-17	0.447506974	0.384	0.205	3.43E-13	Dendritic Cell 1 (M)	VRK2
H3F3A	1.59E-17	0.263419055	0.952	0.909	3.81E-13	Dendritic Cell 1 (M)	H3F3A
RPL6	2.02E-17	0.296607317	0.959	0.939	4.85E-13	Dendritic Cell 1 (M)	RPL6
BID	2.22E-17	0.505523569	0.493	0.316	5.32E-13	Dendritic Cell 1 (M)	BID
LAP31	2.30E-17	0.460165889	0.781	0.654	5.54E-13	Dendritic Cell 1 (M)	LAP3
RAB7B1	3.46E-17	0.651499884	0.257	0.114	8.31E-13	Dendritic Cell 1 (M)	RAB7B
LSM6	7.40E-17	0.394677152	0.432	0.252	1.78E-12	Dendritic Cell 1 (M)	LSM6
RPL27A	7.98E-17	0.296774882	0.955	0.894	1.92E-12	Dendritic Cell 1 (M)	RPL27A
SNX3	8.55E-17	0.757721479	0.705	0.584	2.06E-12	Dendritic Cell 1 (M)	SNX3
RPL23A	1.52E-16	0.294182092	0.935	0.903	3.66E-12	Dendritic Cell 1 (M)	RPL23A
HMGA12	2.70E-16	0.36031677	0.514	0.321	6.48E-12	Dendritic Cell 1 (M)	HMGA1
RPL29	2.85E-16	0.251770464	0.938	0.932	6.86E-12	Dendritic Cell 1 (M)	RPL29
PIM3	4.26E-16	0.476708742	0.541	0.37	1.02E-11	Dendritic Cell 1 (M)	PIM3
MNDA1	9.40E-16	0.339220624	0.729	0.543	2.26E-11	Dendritic Cell 1 (M)	MNDA
REL	9.51E-16	0.421185742	0.832	0.705	2.28E-11	Dendritic Cell 1 (M)	REL
BCL2A11	9.96E-16	0.303142163	0.784	0.621	2.39E-11	Dendritic Cell 1 (M)	BCL2A1
EIF1	1.16E-15	0.250479386	0.983	0.963	2.78E-11	Dendritic Cell 1 (M)	EIF1
GDI2	1.19E-15	0.361952315	0.692	0.533	2.87E-11	Dendritic Cell 1 (M)	GDI2
PGLS	4.27E-15	0.314785784	0.63	0.451	1.03E-10	Dendritic Cell 1 (M)	PGLS
GNG5	4.44E-15	0.323678847	0.818	0.692	1.07E-10	Dendritic Cell 1 (M)	GNG5
CUL1	4.63E-15	0.334876754	0.404	0.228	1.11E-10	Dendritic Cell 1 (M)	CUL1
CXCL11	5.92E-15	0.650155214	0.274	0.128	1.42E-10	Dendritic Cell 1 (M)	CXCL11
GBP11	6.50E-15	0.666436761	0.603	0.461	1.56E-10	Dendritic Cell 1 (M)	GBP1
ATG3	1.32E-14	0.369007306	0.572	0.412	3.17E-10	Dendritic Cell 1 (M)	ATG3
PSMB8	1.36E-14	0.306811159	0.664	0.495	3.26E-10	Dendritic Cell 1 (M)	PSMB8
ARF6	1.52E-14	0.37326148	0.623	0.461	3.66E-10	Dendritic Cell 1 (M)	ARF6
TNFAIP8	2.19E-14	0.342131887	0.582	0.404	5.25E-10	Dendritic Cell 1 (M)	TNFAIP8
COX7C	2.88E-14	0.299091863	0.894	0.778	6.92E-10	Dendritic Cell 1 (M)	COX7C
SMCO41	3.28E-14	0.39857946	0.541	0.37	7.89E-10	Dendritic Cell 1 (M)	SMCO4
AC004687.1	6.09E-14	0.29278793	0.305	0.15	1.46E-09	Dendritic Cell 1 (M)	AC004687.1
RAB29	7.56E-14	0.327397016	0.336	0.181	1.82E-09	Dendritic Cell 1 (M)	RAB29
NACA	8.49E-14	0.250440356	0.932	0.905	2.04E-09	Dendritic Cell 1 (M)	NACA
NDUFV2	9.55E-14	0.349355588	0.582	0.415	2.30E-09	Dendritic Cell 1 (M)	NDUFV2
CBX6	1.27E-13	0.268409758	0.274	0.132	3.04E-09	Dendritic Cell 1 (M)	CBX6
EDEM1	1.36E-13	0.309442914	0.363	0.199	3.27E-09	Dendritic Cell 1 (M)	EDEM1
GBP41	3.08E-13	0.598114682	0.507	0.352	7.41E-09	Dendritic Cell 1 (M)	GBP4
ANKRD44	3.74E-13	0.285804796	0.479	0.302	8.98E-09	Dendritic Cell 1 (M)	ANKRD44
RASSF2	4.58E-13	0.363173034	0.411	0.253	1.10E-08	Dendritic Cell 1 (M)	RASSF2
FAM129A	5.92E-13	0.358128011	0.555	0.381	1.42E-08	Dendritic Cell 1 (M)	FAM129A
FGD21	8.07E-13	0.309437885	0.356	0.205	1.94E-08	Dendritic Cell 1 (M)	FGD2
MCM51	8.28E-13	0.299602608	0.298	0.155	1.99E-08	Dendritic Cell 1 (M)	MCM5
MYL61	1.49E-12	0.281351535	0.955	0.908	3.57E-08	Dendritic Cell 1 (M)	MYL6
TYMP1	1.63E-12	0.288008155	0.938	0.779	3.92E-08	Dendritic Cell 1 (M)	TYMP
TUBA1B1	1.65E-12	0.260787246	0.918	0.779	3.97E-08	Dendritic Cell 1 (M)	TUBA1B
DDX21	2.00E-12	0.284859644	0.658	0.482	4.81E-08	Dendritic Cell 1 (M)	DDX21
BCL2L11	2.01E-12	0.342060998	0.301	0.16	4.84E-08	Dendritic Cell 1 (M)	BCL2L11
CD48	2.23E-12	0.278577668	0.613	0.437	5.37E-08	Dendritic Cell 1 (M)	CD48
NCOA7	2.55E-12	0.379230199	0.411	0.258	6.12E-08	Dendritic Cell 1 (M)	NCOA7
RNH11	3.70E-12	0.334222591	0.75	0.602	8.88E-08	Dendritic Cell 1 (M)	RNH1
EIF3H	3.78E-12	0.272413023	0.651	0.497	9.09E-08	Dendritic Cell 1 (M)	EIF3H
S100A102	4.02E-12	0.326074767	0.89	0.764	9.67E-08	Dendritic Cell 1 (M)	S100A10
TAP2	4.03E-12	0.344401042	0.349	0.206	9.69E-08	Dendritic Cell 1 (M)	TAP2
BTN2A2	4.33E-12	0.286930094	0.332	0.183	1.04E-07	Dendritic Cell 1 (M)	BTN2A2
CDKN1A1	5.20E-12	0.342776342	0.668	0.517	1.25E-07	Dendritic Cell 1 (M)	CDKN1A
LRRK1	5.40E-12	0.28287988	0.291	0.154	1.30E-07	Dendritic Cell 1 (M)	LRRK1
DBNL	5.67E-12	0.311303297	0.575	0.433	1.36E-07	Dendritic Cell 1 (M)	DBNL
ENSA	6.81E-12	0.376528011	0.517	0.363	1.64E-07	Dendritic Cell 1 (M)	ENSA
HNRNPA1	6.97E-12	0.253768051	0.801	0.649	1.67E-07	Dendritic Cell 1 (M)	HNRNPA1
PTPN1	7.41E-12	0.430510307	0.521	0.377	1.78E-07	Dendritic Cell 1 (M)	PTPN1
ST3GAL5	8.08E-12	0.363017507	0.425	0.277	1.94E-07	Dendritic Cell 1 (M)	ST3GAL5
DENND1B	8.77E-12	0.28116727	0.37	0.222	2.11E-07	Dendritic Cell 1 (M)	DENND1B
NMT1	9.46E-12	0.319293088	0.606	0.463	2.27E-07	Dendritic Cell 1 (M)	NMT1
CPNE3	1.02E-11	0.795716506	0.349	0.227	2.45E-07	Dendritic Cell 1 (M)	CPNE3
VOPP1	2.90E-11	0.3706668	0.517	0.369	6.98E-07	Dendritic Cell 1 (M)	VOPP1
ORAI1	6.66E-11	0.273436048	0.332	0.195	1.60E-06	Dendritic Cell 1 (M)	ORAI1
TRABD	9.57E-11	0.27956615	0.339	0.198	2.30E-06	Dendritic Cell 1 (M)	TRABD
TPM32	9.59E-11	0.290094501	0.856	0.789	2.31E-06	Dendritic Cell 1 (M)	TPM3
CFLAR	1.02E-10	0.345144625	0.753	0.624	2.44E-06	Dendritic Cell 1 (M)	CFLAR
UBE2E2	1.18E-10	0.34596389	0.401	0.265	2.85E-06	Dendritic Cell 1 (M)	UBE2E2
TES	1.32E-10	0.259130972	0.38	0.23	3.16E-06	Dendritic Cell 1 (M)	TES
CXCR4	1.39E-10	0.329155617	0.671	0.526	3.35E-06	Dendritic Cell 1 (M)	CXCR4
FCHSD21	1.85E-10	0.251564339	0.339	0.193	4.45E-06	Dendritic Cell 1 (M)	FCHSD2
EFHD2	1.88E-10	0.325903411	0.712	0.603	4.52E-06	Dendritic Cell 1 (M)	EFHD2
C3orf58	2.33E-10	0.265018673	0.253	0.135	5.60E-06	Dendritic Cell 1 (M)	C3orf58
HMGN11	2.35E-10	0.280810342	0.733	0.598	5.66E-06	Dendritic Cell 1 (M)	HMGN1
HLA-DMA1	3.53E-10	0.261695962	0.846	0.698	8.48E-06	Dendritic Cell 1 (M)	HLA-DMA
TNIP2	3.54E-10	0.252388366	0.325	0.195	8.50E-06	Dendritic Cell 1 (M)	TNIP2
RPS10	3.74E-10	0.343518909	0.63	0.473	8.99E-06	Dendritic Cell 1 (M)	RPS10
ALDH21	4.48E-10	0.326391457	0.685	0.513	1.08E-05	Dendritic Cell 1 (M)	ALDH2
EIF3L	4.97E-10	0.26822959	0.596	0.455	1.19E-05	Dendritic Cell 1 (M)	EIF3L
P2RY6	6.12E-10	0.282867556	0.257	0.14	1.47E-05	Dendritic Cell 1 (M)	P2RY6
HERPUD11	7.72E-10	0.319718081	0.682	0.579	1.86E-05	Dendritic Cell 1 (M)	HERPUD1
JAK2	1.51E-09	0.30615581	0.377	0.245	3.63E-05	Dendritic Cell 1 (M)	JAK2
STK4	2.68E-09	0.369084326	0.545	0.425	6.43E-05	Dendritic Cell 1 (M)	STK4
TAPBP	2.68E-09	0.296586892	0.764	0.639	6.44E-05	Dendritic Cell 1 (M)	TAPBP
POMP	3.10E-09	0.272456833	0.812	0.694	7.44E-05	Dendritic Cell 1 (M)	POMP
CLIC21	3.11E-09	0.304550082	0.284	0.169	7.47E-05	Dendritic Cell 1 (M)	CLIC2
APOL31	6.84E-09	0.298011229	0.339	0.211	0.000164485	Dendritic Cell 1 (M)	APOL3
KCNK6	8.62E-09	0.30351442	0.315	0.197	0.00020714	Dendritic Cell 1 (M)	KCNK6
ERICH1	9.68E-09	0.301715475	0.38	0.25	0.000232643	Dendritic Cell 1 (M)	ERICH1
RGCC1	1.11E-08	0.387446203	0.459	0.328	0.0002661	Dendritic Cell 1 (M)	RGCC
CALHM61	1.22E-08	0.451664983	0.315	0.201	0.000292178	Dendritic Cell 1 (M)	CALHM6
RAB8B	1.46E-08	0.377177936	0.462	0.342	0.000350672	Dendritic Cell 1 (M)	RAB8B
GRSF1	3.04E-08	0.30740479	0.339	0.223	0.000730634	Dendritic Cell 1 (M)	GRSF1
RAB321	5.51E-08	0.39132904	0.486	0.392	0.001323108	Dendritic Cell 1 (M)	RAB32
HINT11	7.09E-08	0.261969059	0.692	0.605	0.001703306	Dendritic Cell 1 (M)	HINT1
CXCL101	9.92E-08	0.498755502	0.342	0.214	0.002385226	Dendritic Cell 1 (M)	CXCL10
RPL36A	1.34E-07	0.28064072	0.5	0.375	0.003218498	Dendritic Cell 1 (M)	RPL36A
TRADD	1.98E-07	0.277200989	0.298	0.193	0.004759543	Dendritic Cell 1 (M)	TRADD
MYD88	2.41E-07	0.29341569	0.394	0.285	0.005785432	Dendritic Cell 1 (M)	MYD88
FDPS	3.81E-07	0.262969239	0.332	0.221	0.009155845	Dendritic Cell 1 (M)	FDPS
ZFAS1	4.68E-07	0.275364504	0.623	0.523	0.011256132	Dendritic Cell 1 (M)	ZFAS1
IL4I11	4.88E-07	0.407846769	0.517	0.416	0.011735963	Dendritic Cell 1 (M)	IL4I1
NR4A31	5.64E-07	0.269827849	0.517	0.4	0.013559561	Dendritic Cell 1 (M)	NR4A3
TMEM131	1.74E-06	0.273161488	0.301	0.206	0.041806057	Dendritic Cell 1 (M)	TMEM131
SLC8A11	2.16E-06	0.275989206	0.483	0.385	0.051829406	Dendritic Cell 1 (M)	SLC8A1
ENTPD1	2.23E-06	0.268706232	0.342	0.244	0.053541486	Dendritic Cell 1 (M)	ENTPD1
IRF1	3.16E-06	0.334149315	0.664	0.557	0.076002095	Dendritic Cell 1 (M)	IRF1
VAC14	4.52E-06	0.278022378	0.267	0.18	0.108697956	Dendritic Cell 1 (M)	VAC14
NABP11	6.18E-06	0.318538761	0.562	0.477	0.148426825	Dendritic Cell 1 (M)	NABP1
C1orf1621	9.31E-06	0.320688815	0.63	0.564	0.223847737	Dendritic Cell 1 (M)	C1orf162
CLEC10A1	1.45E-05	0.468421944	0.277	0.201	0.348560426	Dendritic Cell 1 (M)	CLEC10A
SEC61B	1.61E-05	0.26937736	0.647	0.579	0.386325462	Dendritic Cell 1 (M)	SEC61B
SPINT2	2.02E-05	0.269908461	0.432	0.355	0.485752284	Dendritic Cell 1 (M)	SPINT2
HCK1	2.23E-05	0.262988733	0.503	0.417	0.536091471	Dendritic Cell 1 (M)	HCK
ASAP11	3.56E-05	0.269071073	0.432	0.351	0.855928188	Dendritic Cell 1 (M)	ASAP1
TNFAIP21	9.27E-05	0.49723671	0.634	0.574	1	Dendritic Cell 1 (M)	TNFAIP2
CPVL1	9.36E-05	1.02583555	0.548	0.562	1	Dendritic Cell 1 (M)	CPVL
DOCK2	0.00012571	0.258461749	0.541	0.465	1	Dendritic Cell 1 (M)	DOCK2
HMGN3	0.000226448	0.252312101	0.476	0.401	1	Dendritic Cell 1 (M)	HMGN3
MT2A1	0.000444328	0.363351183	0.548	0.502	1	Dendritic Cell 1 (M)	MT2A
GBP51	0.001044622	0.342511363	0.397	0.326	1	Dendritic Cell 1 (M)	GBP5
CKLF	0.003732589	0.287888254	0.37	0.332	1	Dendritic Cell 1 (M)	CKLF
CYTOR	0.003948055	0.300746509	0.295	0.227	1	Dendritic Cell 1 (M)	CYTOR
TNFSF10	0.005586175	0.256260698	0.473	0.428	1	Dendritic Cell 1 (M)	TNFSF10
ATF51	0.008789959	0.255684043	0.428	0.379	1	Dendritic Cell 1 (M)	ATF5
GNLY	0	3.616569976	0.766	0.042	0	NK (M)	GNLY
NKG7	0	3.168642738	0.932	0.069	0	NK (M)	NKG7
CTSW	0	2.57747619	0.75	0.041	0	NK (M)	CTSW
XCL2	0	2.550203409	0.657	0.024	0	NK (M)	XCL2
CCL5	0	2.509754086	0.746	0.225	0	NK (M)	CCL5
XCL1	0	2.278315889	0.563	0.021	0	NK (M)	XCL1
GZMB	0	2.272164728	0.535	0.02	0	NK (M)	GZMB
CD7	0	2.175008024	0.607	0.045	0	NK (M)	CD7
TRDC	0	2.057548181	0.585	0.02	0	NK (M)	TRDC
GZMA	0	2.056202463	0.501	0.023	0	NK (M)	GZMA
KLRC1	0	1.999062589	0.504	0.016	0	NK (M)	KLRC1
HOPX	0	1.990030157	0.527	0.028	0	NK (M)	HOPX
KLRD1	0	1.930123891	0.547	0.021	0	NK (M)	KLRD1
PRF1	0	1.89400489	0.522	0.022	0	NK (M)	PRF1
CST7	0	1.886022102	0.592	0.042	0	NK (M)	CST7
CD247	0	1.785743739	0.549	0.031	0	NK (M)	CD247
KLRB1	0	1.74004008	0.426	0.016	0	NK (M)	KLRB1
IL2RB	0	1.72841729	0.49	0.039	0	NK (M)	IL2RB
TNFRSF18	0	1.669907895	0.448	0.028	0	NK (M)	TNFRSF18
CD2	0	1.665861431	0.551	0.051	0	NK (M)	CD2
RUNX3	0	1.606166284	0.526	0.149	0	NK (M)	RUNX3
IL32	0	1.579959667	0.395	0.062	0	NK (M)	IL32
APOBEC3G	0	1.5423388	0.547	0.211	0	NK (M)	APOBEC3G
SAMD3	0	1.498740203	0.418	0.017	0	NK (M)	SAMD3
KRT86	0	1.469274369	0.343	0.012	0	NK (M)	KRT86
CD3E	0	1.435199875	0.436	0.035	0	NK (M)	CD3E
KRT81	0	1.426059138	0.32	0.011	0	NK (M)	KRT81
GZMH	0	1.342705471	0.252	0.01	0	NK (M)	GZMH
MATK	0	1.272615199	0.363	0.062	0	NK (M)	MATK
CD96	0	1.267478776	0.343	0.019	0	NK (M)	CD96
KLRC2	0	1.257314163	0.273	0.01	0	NK (M)	KLRC2
ACAP1	0	1.23611553	0.371	0.067	0	NK (M)	ACAP1
NCAM1	0	1.186155102	0.274	0.011	0	NK (M)	NCAM1
ETS1	0	1.157156155	0.355	0.061	0	NK (M)	ETS1
SKAP1	0	1.022715024	0.274	0.022	0	NK (M)	SKAP1
ITM2A	0	0.995581945	0.262	0.027	0	NK (M)	ITM2A
RPS271	0	0.981590691	0.994	0.98	0	NK (M)	RPS27
TRBC2	0	0.97919418	0.275	0.032	0	NK (M)	TRBC2
RPS3	0	0.978373739	0.965	0.936	0	NK (M)	RPS3
RPS19	0	0.968233611	0.989	0.963	0	NK (M)	RPS19
RPS291	0	0.962861397	0.998	0.981	0	NK (M)	RPS29
RPS15A	0	0.951095569	0.961	0.929	0	NK (M)	RPS15A
RPS27A1	0	0.84859642	0.967	0.961	0	NK (M)	RPS27A
RPL23A1	0	0.839766893	0.911	0.902	0	NK (M)	RPL23A
RPS71	0	0.81182775	0.927	0.907	0	NK (M)	RPS7
RPS4X1	0	0.767051076	0.962	0.955	0	NK (M)	RPS4X
RPL3	0	0.764257506	0.954	0.945	0	NK (M)	RPL3
RPL411	0	0.759198593	0.998	0.988	0	NK (M)	RPL41
RPS181	0	0.713896926	0.983	0.971	0	NK (M)	RPS18
RPL321	0	0.676316781	0.973	0.968	0	NK (M)	RPL32
RPL371	0	0.652789896	0.979	0.964	0	NK (M)	RPL37
MALAT11	0	0.648068012	0.998	0.997	0	NK (M)	MALAT1
RPL13	0	0.618069691	0.988	0.986	0	NK (M)	RPL13
RPLP11	0	0.612355333	0.994	0.992	0	NK (M)	RPLP1
RPL301	1.43E-302	0.678951219	0.952	0.943	3.43E-298	NK (M)	RPL30
RPS121	3.30E-301	0.655638735	0.975	0.976	7.94E-297	NK (M)	RPS12
RPL101	6.05E-297	0.553437913	0.989	0.987	1.45E-292	NK (M)	RPL10
STK17A	3.71E-295	1.385053308	0.452	0.137	8.93E-291	NK (M)	STK17A
RPL35A1	3.73E-293	0.719177694	0.925	0.918	8.96E-289	NK (M)	RPL35A
RPL341	2.40E-292	0.598421367	0.969	0.972	5.78E-288	NK (M)	RPL34
FYN	2.99E-291	1.052746656	0.295	0.05	7.18E-287	NK (M)	FYN
RPL7A	1.57E-289	0.68441347	0.933	0.945	3.76E-285	NK (M)	RPL7A
RPS141	6.19E-285	0.603301071	0.963	0.974	1.49E-280	NK (M)	RPS14
RPS151	1.60E-281	0.635662001	0.956	0.957	3.86E-277	NK (M)	RPS15
RPL191	7.49E-272	0.583895257	0.961	0.965	1.80E-267	NK (M)	RPL19
CCND2	1.52E-270	1.201434524	0.332	0.072	3.65E-266	NK (M)	CCND2
HCST	4.34E-270	1.256879691	0.742	0.576	1.04E-265	NK (M)	HCST
RPL181	2.81E-264	0.683711816	0.916	0.933	6.75E-260	NK (M)	RPL18
RPL37A1	6.01E-264	0.584816298	0.975	0.968	1.44E-259	NK (M)	RPL37A
RPL291	4.09E-260	0.660637869	0.918	0.934	9.83E-256	NK (M)	RPL29
RPS241	2.57E-259	0.57372711	0.964	0.978	6.17E-255	NK (M)	RPS24
IFITM2	1.14E-258	1.562547802	0.679	0.457	2.74E-254	NK (M)	IFITM2
CRTAM	1.84E-250	1.775538022	0.333	0.08	4.41E-246	NK (M)	CRTAM
RPL141	2.93E-247	0.690085096	0.898	0.902	7.04E-243	NK (M)	RPL14
RPSA	7.39E-245	0.822313509	0.85	0.842	1.78E-240	NK (M)	RPSA
RPL18A1	2.42E-232	0.600173303	0.946	0.948	5.81E-228	NK (M)	RPL18A
EVL	7.21E-229	1.373258267	0.599	0.362	1.73E-224	NK (M)	EVL
RPL10A1	6.76E-223	0.729933288	0.846	0.857	1.62E-218	NK (M)	RPL10A
AREG	1.38E-220	1.527377917	0.454	0.165	3.31E-216	NK (M)	AREG
TUBA4A	4.24E-215	0.983785195	0.259	0.052	1.02E-210	NK (M)	TUBA4A
RPL361	6.13E-215	0.547914712	0.926	0.953	1.47E-210	NK (M)	RPL36
RPS231	2.06E-214	0.530236514	0.944	0.96	4.96E-210	NK (M)	RPS23
RPL111	6.06E-213	0.504338701	0.952	0.971	1.46E-208	NK (M)	RPL11
RPL281	1.34E-212	0.48774807	0.986	0.988	3.22E-208	NK (M)	RPL28
RPL351	5.70E-208	0.615297632	0.9	0.945	1.37E-203	NK (M)	RPL35
RPLP21	7.50E-201	0.53038127	0.93	0.964	1.80E-196	NK (M)	RPLP2
RPS251	1.36E-198	0.587443854	0.888	0.926	3.27E-194	NK (M)	RPS25
CORO1A	2.83E-198	1.14164333	0.635	0.436	6.80E-194	NK (M)	CORO1A
CHST12	3.61E-194	1.104224084	0.319	0.092	8.68E-190	NK (M)	CHST12
RPL51	5.50E-192	0.594520841	0.879	0.908	1.32E-187	NK (M)	RPL5
RPS3A1	6.46E-190	0.553279578	0.909	0.938	1.55E-185	NK (M)	RPS3A
RPL61	4.91E-188	0.551082979	0.914	0.942	1.18E-183	NK (M)	RPL6
CD69	2.16E-184	1.265914225	0.491	0.232	5.19E-180	NK (M)	CD69
FAU1	2.99E-181	0.54500199	0.898	0.938	7.19E-177	NK (M)	FAU
RPL15	4.75E-173	0.500414633	0.925	0.955	1.14E-168	NK (M)	RPL15
RPL241	3.55E-168	0.644689876	0.825	0.882	8.53E-164	NK (M)	RPL24
RPS211	6.75E-167	0.644353847	0.835	0.89	1.62E-162	NK (M)	RPS21
RAC2	1.01E-163	1.115180459	0.489	0.263	2.42E-159	NK (M)	RAC2
RPL211	2.40E-162	0.502930598	0.912	0.949	5.78E-158	NK (M)	RPL21
RPS22	4.06E-162	0.446138499	0.973	0.979	9.75E-158	NK (M)	RPS2
BTG1	3.48E-159	0.703413135	0.851	0.86	8.36E-155	NK (M)	BTG1
CMC1	7.05E-159	1.446521132	0.411	0.19	1.69E-154	NK (M)	CMC1
ICAM3	1.63E-158	0.843501315	0.265	0.072	3.91E-154	NK (M)	ICAM3
TMA7	1.68E-154	0.841990572	0.709	0.704	4.04E-150	NK (M)	TMA7
RPL261	3.17E-153	0.608394909	0.859	0.886	7.62E-149	NK (M)	RPL26
RPS51	3.50E-153	0.61990437	0.815	0.865	8.41E-149	NK (M)	RPS5
RPL13A	3.05E-147	0.463201903	0.911	0.957	7.33E-143	NK (M)	RPL13A
RPL391	2.97E-141	0.402362484	0.946	0.976	7.14E-137	NK (M)	RPL39
DDX5	1.74E-139	0.508395237	0.898	0.95	4.19E-135	NK (M)	DDX5
7-Sep	2.92E-137	0.991393176	0.636	0.591	7.02E-133	NK (M)	7-Sep
RPS61	1.06E-116	0.428618017	0.898	0.956	2.54E-112	NK (M)	RPS6
PTMA2	1.00E-114	0.425277171	0.942	0.971	2.41E-110	NK (M)	PTMA
RPS281	3.91E-114	0.352840674	0.972	0.981	9.39E-110	NK (M)	RPS28
MYL12A	2.98E-112	0.79298922	0.687	0.748	7.16E-108	NK (M)	MYL12A
STK17B	1.25E-109	1.071555262	0.495	0.344	3.00E-105	NK (M)	STK17B
RPS81	2.08E-105	0.363306723	0.925	0.963	5.01E-101	NK (M)	RPS8
PTPN7	4.60E-101	0.899060195	0.278	0.113	1.11E-96	NK (M)	PTPN7
DDIT4	1.60E-100	1.082749021	0.401	0.225	3.86E-96	NK (M)	DDIT4
ARPC5L	2.45E-98	1.036455509	0.359	0.192	5.89E-94	NK (M)	ARPC5L
HMGB11	2.31E-97	0.567553281	0.743	0.84	5.55E-93	NK (M)	HMGB1
NACA1	2.80E-94	0.41446507	0.836	0.914	6.73E-90	NK (M)	NACA
CALM11	5.95E-92	0.551114627	0.764	0.846	1.43E-87	NK (M)	CALM1
PTPRC	2.60E-87	0.536707984	0.76	0.857	6.24E-83	NK (M)	PTPRC
ZFP36L2	5.85E-87	0.860909241	0.686	0.747	1.41E-82	NK (M)	ZFP36L2
ISG201	1.40E-86	0.935293797	0.325	0.164	3.36E-82	NK (M)	ISG20
RPL91	2.08E-84	0.36719708	0.875	0.948	5.01E-80	NK (M)	RPL9
RPL81	6.37E-75	0.331373786	0.891	0.956	1.53E-70	NK (M)	RPL8
PDCD4	9.38E-75	1.028880741	0.428	0.31	2.25E-70	NK (M)	PDCD4
ARHGAP9	3.78E-74	0.881398238	0.29	0.149	9.09E-70	NK (M)	ARHGAP9
ACTG12	5.75E-74	0.425511054	0.887	0.938	1.38E-69	NK (M)	ACTG1
RPS131	1.58E-72	0.346489621	0.873	0.938	3.80E-68	NK (M)	RPS13
CD52	1.40E-68	0.915286194	0.532	0.454	3.35E-64	NK (M)	CD52
RPL38	4.08E-65	0.35169278	0.833	0.93	9.81E-61	NK (M)	RPL38
SLA	5.80E-65	1.078047868	0.457	0.383	1.39E-60	NK (M)	SLA
CEMIP2	2.91E-62	0.914451102	0.285	0.155	7.00E-58	NK (M)	CEMIP2
RACK1	2.62E-61	0.352638054	0.815	0.911	6.31E-57	NK (M)	RACK1
JUND	3.73E-59	0.62482457	0.72	0.84	8.96E-55	NK (M)	JUND
BTF3	7.43E-58	0.536675134	0.656	0.767	1.79E-53	NK (M)	BTF3
H3F3B1	1.06E-57	0.364002459	0.83	0.937	2.55E-53	NK (M)	H3F3B
IL2RG	3.78E-57	0.891163911	0.391	0.29	9.09E-53	NK (M)	IL2RG
DUSP2	5.43E-57	0.799126429	0.588	0.569	1.30E-52	NK (M)	DUSP2
RPL221	4.74E-52	0.365245475	0.797	0.918	1.14E-47	NK (M)	RPL22
RPL271	1.65E-51	0.389231975	0.738	0.877	3.96E-47	NK (M)	RPL27
TRAF3IP3	3.61E-51	0.79840571	0.257	0.143	8.69E-47	NK (M)	TRAF3IP3
RPS161	7.31E-50	0.28538148	0.873	0.949	1.76E-45	NK (M)	RPS16
NCL1	3.05E-49	0.690898665	0.61	0.715	7.32E-45	NK (M)	NCL
SLFN5	1.28E-46	0.899507501	0.341	0.245	3.08E-42	NK (M)	SLFN5
EEF1B21	1.08E-45	0.435886364	0.679	0.805	2.61E-41	NK (M)	EEF1B2
EEF1D	3.09E-43	0.552817126	0.634	0.776	7.43E-39	NK (M)	EEF1D
CLIC11	3.92E-42	0.470484196	0.667	0.802	9.43E-38	NK (M)	CLIC1
RPL12	1.45E-41	0.289190291	0.86	0.942	3.47E-37	NK (M)	RPL12
LY6E	5.83E-41	0.613679738	0.594	0.638	1.40E-36	NK (M)	LY6E
PIK3R1	3.45E-38	0.918485387	0.388	0.335	8.29E-34	NK (M)	PIK3R1
PNISR	6.41E-35	0.752687912	0.49	0.525	1.54E-30	NK (M)	PNISR
TSC22D3	8.47E-35	0.864779387	0.471	0.473	2.03E-30	NK (M)	TSC22D3
GNPTAB	3.14E-32	0.90597468	0.428	0.433	7.54E-28	NK (M)	GNPTAB
EIF3G	5.50E-32	0.805727997	0.474	0.513	1.32E-27	NK (M)	EIF3G
MT-ND5	6.43E-31	0.251797254	0.923	0.976	1.54E-26	NK (M)	MT-ND5
RPL36AL	6.74E-31	0.526750069	0.583	0.729	1.62E-26	NK (M)	RPL36AL
C9orf16	6.46E-29	0.797608247	0.434	0.448	1.55E-24	NK (M)	C9orf16
PAXX	4.03E-27	0.768525846	0.278	0.212	9.69E-23	NK (M)	PAXX
RPL31	5.45E-27	0.42929644	0.62	0.763	1.31E-22	NK (M)	RPL31
OST4	5.96E-27	0.501059999	0.572	0.702	1.43E-22	NK (M)	OST4
SERBP11	9.29E-27	0.523470605	0.582	0.73	2.23E-22	NK (M)	SERBP1
RSRP1	1.23E-25	0.717977991	0.469	0.515	2.97E-21	NK (M)	RSRP1
ANXA6	2.41E-25	0.699572611	0.288	0.224	5.80E-21	NK (M)	ANXA6
PSME11	9.23E-25	0.516032964	0.564	0.688	2.22E-20	NK (M)	PSME1
MYL12B	2.43E-23	0.462139723	0.574	0.727	5.83E-19	NK (M)	MYL12B
ACTN4	8.36E-23	0.759370265	0.39	0.392	2.01E-18	NK (M)	ACTN4
PGAM12	1.38E-22	0.289168807	0.242	0.47	3.32E-18	NK (M)	PGAM1
RNF19A	3.62E-22	0.856375419	0.321	0.283	8.69E-18	NK (M)	RNF19A
TOMM7	6.99E-21	0.483186277	0.561	0.707	1.68E-16	NK (M)	TOMM7
SRSF7	1.51E-20	0.60136153	0.488	0.562	3.64E-16	NK (M)	SRSF7
COMMD6	6.42E-20	0.600964601	0.492	0.587	1.54E-15	NK (M)	COMMD6
SRP14	8.30E-19	0.294901403	0.685	0.852	2.00E-14	NK (M)	SRP14
UBB	1.67E-18	0.315103906	0.664	0.839	4.02E-14	NK (M)	UBB
MRPS21	3.90E-17	0.260003008	0.206	0.385	9.36E-13	NK (M)	MRPS21
REL1	4.19E-17	0.508366407	0.587	0.722	1.01E-12	NK (M)	REL
GAPDH2	9.26E-17	0.302285739	0.8	0.921	2.23E-12	NK (M)	GAPDH
CLEC2B	1.47E-16	0.74533939	0.41	0.455	3.52E-12	NK (M)	CLEC2B
HNRNPA2B11	1.51E-16	0.314545759	0.675	0.87	3.63E-12	NK (M)	HNRNPA2B1
ABCF1	1.52E-16	0.315263207	0.205	0.379	3.65E-12	NK (M)	ABCF1
ILF3	5.12E-16	0.254273493	0.176	0.327	1.23E-11	NK (M)	ILF3
TCF25	7.48E-16	0.260043242	0.295	0.539	1.80E-11	NK (M)	TCF25
MRPL51	1.04E-15	0.255497067	0.212	0.388	2.50E-11	NK (M)	MRPL51
ID21	1.65E-15	0.455170216	0.535	0.619	3.97E-11	NK (M)	ID2
AP2B1	1.82E-15	0.266078952	0.23	0.418	4.38E-11	NK (M)	AP2B1
SF3B5	2.17E-15	0.265700032	0.245	0.445	5.22E-11	NK (M)	SF3B5
RWDD1	4.03E-15	0.253853562	0.218	0.395	9.68E-11	NK (M)	RWDD1
FUS	9.40E-15	0.536921703	0.524	0.669	2.26E-10	NK (M)	FUS
COPS6	9.57E-15	0.280077958	0.156	0.29	2.30E-10	NK (M)	COPS6
THOC7	1.00E-14	0.273271914	0.165	0.304	2.41E-10	NK (M)	THOC7
NRBP1	1.17E-14	0.271613507	0.17	0.31	2.82E-10	NK (M)	NRBP1
PET100	1.59E-14	0.28872223	0.233	0.421	3.82E-10	NK (M)	PET100
RPS26	2.39E-14	0.499739332	0.525	0.678	5.74E-10	NK (M)	RPS26
DDX17	3.90E-14	0.481963526	0.53	0.689	9.37E-10	NK (M)	DDX17
PPP1R7	5.64E-14	0.250002825	0.152	0.279	1.35E-09	NK (M)	PPP1R7
[truncated: 1,831 more rows]
