# Supplementary material for: Regionally distinct trophoblast regulate barrier function and invasion in the human placenta
Source: eLife. 2022 Jul 7;11:e78829. doi: 10.7554/eLife.78829 (PMC9323019; doi:10.7554/eLife.78829)
Supplement: Figure 1—source data 2. [file elife-78829-fig1-data2.csv]

	p_val	avg_logFC	pct.1	pct.2	p_val_adj	cluster	gene
SPARCL1	5.06E-237	1.299239194	0.961	0.412	1.22E-232	Decidual Stroma 1 (M)	SPARCL1
RAMP1	4.14E-223	1.07555379	0.945	0.386	9.94E-219	Decidual Stroma 1 (M)	RAMP1
TAGLN	6.59E-208	1.321080689	0.928	0.479	1.58E-203	Decidual Stroma 1 (M)	TAGLN
GSN	2.90E-202	1.010748337	0.961	0.684	6.96E-198	Decidual Stroma 1 (M)	GSN
TPM1	3.34E-202	1.130390883	0.956	0.703	8.03E-198	Decidual Stroma 1 (M)	TPM1
ULK4	8.09E-197	0.956168132	0.77	0.256	1.94E-192	Decidual Stroma 1 (M)	ULK4
CST3	5.47E-187	0.851787864	0.992	0.942	1.32E-182	Decidual Stroma 1 (M)	CST3
PPP1R14A	2.63E-185	1.118065509	0.796	0.312	6.33E-181	Decidual Stroma 1 (M)	PPP1R14A
C3	1.51E-178	1.149465362	0.832	0.361	3.64E-174	Decidual Stroma 1 (M)	C3
P2RY14	2.85E-173	0.84989418	0.747	0.232	6.85E-169	Decidual Stroma 1 (M)	P2RY14
MITF	1.50E-169	0.798283634	0.585	0.149	3.59E-165	Decidual Stroma 1 (M)	MITF
IGF1	5.26E-165	0.963952287	0.693	0.214	1.26E-160	Decidual Stroma 1 (M)	IGF1
MYH11	3.00E-158	1.026755477	0.414	0.055	7.20E-154	Decidual Stroma 1 (M)	MYH11
EEF1A1	1.94E-156	0.401863442	0.997	0.997	4.67E-152	Decidual Stroma 1 (M)	EEF1A1
RPL3	1.76E-154	0.61836157	0.991	0.979	4.22E-150	Decidual Stroma 1 (M)	RPL3
RPLP1	2.91E-154	0.478899146	1	0.991	6.99E-150	Decidual Stroma 1 (M)	RPLP1
TPM2	2.07E-152	0.813449141	0.943	0.689	4.98E-148	Decidual Stroma 1 (M)	TPM2
ACTA2	9.33E-152	1.036180472	0.825	0.441	2.24E-147	Decidual Stroma 1 (M)	ACTA2
TMSB4X	4.31E-149	0.588886621	0.996	0.985	1.04E-144	Decidual Stroma 1 (M)	TMSB4X
CFD	8.06E-147	0.850530167	0.969	0.665	1.94E-142	Decidual Stroma 1 (M)	CFD
SERTM2	1.57E-143	0.521098456	0.313	0.03	3.77E-139	Decidual Stroma 1 (M)	SERTM2
RPS4X	5.67E-143	0.549979756	0.986	0.977	1.36E-138	Decidual Stroma 1 (M)	RPS4X
EMX2	3.00E-139	0.889421703	0.668	0.234	7.20E-135	Decidual Stroma 1 (M)	EMX2
EFHD1	1.81E-137	0.698548348	0.57	0.166	4.34E-133	Decidual Stroma 1 (M)	EFHD1
RPS18	1.46E-136	0.596362723	0.995	0.988	3.51E-132	Decidual Stroma 1 (M)	RPS18
TES	6.28E-134	0.792366881	0.654	0.24	1.51E-129	Decidual Stroma 1 (M)	TES
RPL7A	8.90E-133	0.505470613	0.992	0.978	2.14E-128	Decidual Stroma 1 (M)	RPL7A
MYLK	2.33E-130	0.805072376	0.587	0.178	5.60E-126	Decidual Stroma 1 (M)	MYLK
RPL10A	5.24E-130	0.561246014	0.979	0.951	1.26E-125	Decidual Stroma 1 (M)	RPL10A
TXNIP	2.42E-128	0.714312502	0.98	0.816	5.81E-124	Decidual Stroma 1 (M)	TXNIP
RPL5	2.50E-126	0.491467644	0.99	0.97	6.01E-122	Decidual Stroma 1 (M)	RPL5
FOXO1	1.20E-124	0.763867727	0.795	0.366	2.88E-120	Decidual Stroma 1 (M)	FOXO1
RPL29	4.52E-123	0.586710833	0.98	0.964	1.09E-118	Decidual Stroma 1 (M)	RPL29
RPL6	6.81E-123	0.468131653	0.988	0.97	1.64E-118	Decidual Stroma 1 (M)	RPL6
C11orf96	2.34E-121	0.812304003	0.963	0.577	5.62E-117	Decidual Stroma 1 (M)	C11orf96
TCEAL4	5.34E-121	0.715756565	0.919	0.736	1.28E-116	Decidual Stroma 1 (M)	TCEAL4
MDK	2.33E-119	0.763733989	0.86	0.562	5.61E-115	Decidual Stroma 1 (M)	MDK
OSR2	8.78E-119	0.853760062	0.681	0.276	2.11E-114	Decidual Stroma 1 (M)	OSR2
RPL37	1.66E-118	0.452818686	0.993	0.98	3.99E-114	Decidual Stroma 1 (M)	RPL37
RPS24	7.23E-117	0.470056047	0.988	0.983	1.74E-112	Decidual Stroma 1 (M)	RPS24
CNN1	9.12E-116	0.920460378	0.537	0.178	2.19E-111	Decidual Stroma 1 (M)	CNN1
RPL12	1.27E-115	0.658218924	0.986	0.96	3.06E-111	Decidual Stroma 1 (M)	RPL12
RPL34	1.48E-115	0.430030721	0.988	0.979	3.55E-111	Decidual Stroma 1 (M)	RPL34
PTMA	7.13E-114	0.569587815	0.991	0.968	1.71E-109	Decidual Stroma 1 (M)	PTMA
IGFBP7	1.49E-113	0.660794501	0.992	0.72	3.58E-109	Decidual Stroma 1 (M)	IGFBP7
TMEM37	3.06E-112	0.679739968	0.689	0.272	7.36E-108	Decidual Stroma 1 (M)	TMEM37
MUM1L1	2.98E-111	0.536884052	0.376	0.076	7.17E-107	Decidual Stroma 1 (M)	MUM1L1
RPS27	8.81E-111	0.432687192	0.995	0.99	2.12E-106	Decidual Stroma 1 (M)	RPS27
RGMA	9.54E-110	0.39899694	0.275	0.034	2.29E-105	Decidual Stroma 1 (M)	RGMA
RPL7	1.14E-108	0.48220204	0.977	0.937	2.74E-104	Decidual Stroma 1 (M)	RPL7
MYOCD	2.84E-108	0.462445748	0.33	0.056	6.82E-104	Decidual Stroma 1 (M)	MYOCD
RPL32	1.16E-107	0.443098438	0.99	0.979	2.80E-103	Decidual Stroma 1 (M)	RPL32
ATF3	3.65E-107	0.869568514	0.849	0.564	8.77E-103	Decidual Stroma 1 (M)	ATF3
RPS8	1.99E-106	0.442613227	0.995	0.981	4.78E-102	Decidual Stroma 1 (M)	RPS8
RPL37A	6.43E-102	0.398189072	0.995	0.981	1.54E-97	Decidual Stroma 1 (M)	RPL37A
RPS6	3.45E-100	0.425678025	0.983	0.971	8.29E-96	Decidual Stroma 1 (M)	RPS6
SERPING1	1.48E-97	0.560938879	0.945	0.786	3.55E-93	Decidual Stroma 1 (M)	SERPING1
C20orf27	1.10E-96	0.672293809	0.655	0.309	2.65E-92	Decidual Stroma 1 (M)	C20orf27
RPL11	1.45E-96	0.395715473	0.988	0.981	3.48E-92	Decidual Stroma 1 (M)	RPL11
CSRP1	2.11E-95	0.636788636	0.773	0.475	5.06E-91	Decidual Stroma 1 (M)	CSRP1
RPL13	3.98E-95	0.45717012	0.996	0.991	9.55E-91	Decidual Stroma 1 (M)	RPL13
CPXM1	3.50E-94	0.626583064	0.876	0.452	8.42E-90	Decidual Stroma 1 (M)	CPXM1
AKAP13	7.89E-94	0.616123552	0.834	0.612	1.90E-89	Decidual Stroma 1 (M)	AKAP13
LONRF2	8.16E-94	0.575860507	0.504	0.171	1.96E-89	Decidual Stroma 1 (M)	LONRF2
ZYX	1.45E-92	0.601316142	0.813	0.51	3.50E-88	Decidual Stroma 1 (M)	ZYX
IGFBP6	1.79E-92	0.594021335	0.869	0.485	4.31E-88	Decidual Stroma 1 (M)	IGFBP6
C1S	1.82E-92	0.569374206	0.922	0.689	4.38E-88	Decidual Stroma 1 (M)	C1S
RPS2	2.35E-92	0.492273405	0.993	0.985	5.65E-88	Decidual Stroma 1 (M)	RPS2
RPS3A	7.39E-92	0.49682685	0.98	0.956	1.78E-87	Decidual Stroma 1 (M)	RPS3A
APOD	7.36E-91	0.66022201	0.866	0.409	1.77E-86	Decidual Stroma 1 (M)	APOD
PRRX1	9.66E-90	0.505074307	0.576	0.226	2.32E-85	Decidual Stroma 1 (M)	PRRX1
SPOCK1	2.42E-89	0.443939555	0.799	0.325	5.81E-85	Decidual Stroma 1 (M)	SPOCK1
CTSC	7.34E-89	0.678529819	0.732	0.375	1.77E-84	Decidual Stroma 1 (M)	CTSC
RPS9	1.05E-87	0.444717314	0.975	0.961	2.52E-83	Decidual Stroma 1 (M)	RPS9
XIST	2.82E-87	0.504286983	0.854	0.466	6.79E-83	Decidual Stroma 1 (M)	XIST
DSTN	5.28E-86	0.413298017	0.986	0.946	1.27E-81	Decidual Stroma 1 (M)	DSTN
CYP4B1	2.76E-84	0.44421487	0.325	0.074	6.64E-80	Decidual Stroma 1 (M)	CYP4B1
ZBTB16	8.07E-84	0.529270444	0.46	0.16	1.94E-79	Decidual Stroma 1 (M)	ZBTB16
LMOD1	1.43E-83	0.572203768	0.676	0.355	3.45E-79	Decidual Stroma 1 (M)	LMOD1
FBXO32	1.52E-83	0.66037017	0.551	0.221	3.65E-79	Decidual Stroma 1 (M)	FBXO32
NACA	2.10E-83	0.378182401	0.975	0.951	5.05E-79	Decidual Stroma 1 (M)	NACA
CTSK	3.40E-83	0.540463922	0.693	0.301	8.17E-79	Decidual Stroma 1 (M)	CTSK
RPL13A	7.38E-83	0.402283852	0.986	0.965	1.77E-78	Decidual Stroma 1 (M)	RPL13A
OLFML2B	1.64E-81	0.54524166	0.427	0.132	3.94E-77	Decidual Stroma 1 (M)	OLFML2B
KCNK6	2.59E-81	0.674062444	0.734	0.442	6.22E-77	Decidual Stroma 1 (M)	KCNK6
RACK1	3.16E-81	0.41985492	0.977	0.951	7.61E-77	Decidual Stroma 1 (M)	RACK1
ALDH1A1	8.20E-81	0.571312654	0.666	0.304	1.97E-76	Decidual Stroma 1 (M)	ALDH1A1
CD55	1.58E-80	0.597547976	0.736	0.425	3.79E-76	Decidual Stroma 1 (M)	CD55
PALMD	4.04E-80	0.522038021	0.762	0.335	9.71E-76	Decidual Stroma 1 (M)	PALMD
IRS2	1.76E-78	0.498351399	0.736	0.326	4.24E-74	Decidual Stroma 1 (M)	IRS2
GLIPR1	5.34E-78	0.537488445	0.538	0.232	1.28E-73	Decidual Stroma 1 (M)	GLIPR1
NR4A1	1.61E-77	0.650130778	0.722	0.432	3.87E-73	Decidual Stroma 1 (M)	NR4A1
PGR	3.34E-77	0.552125244	0.507	0.199	8.03E-73	Decidual Stroma 1 (M)	PGR
FBLN1	5.90E-77	0.478378775	0.949	0.74	1.42E-72	Decidual Stroma 1 (M)	FBLN1
RPL9	1.83E-76	0.314594652	0.99	0.971	4.40E-72	Decidual Stroma 1 (M)	RPL9
ECM2	1.98E-76	0.532305631	0.385	0.12	4.75E-72	Decidual Stroma 1 (M)	ECM2
SYNPO2	2.87E-76	0.468925977	0.56	0.244	6.89E-72	Decidual Stroma 1 (M)	SYNPO2
OMD	3.03E-75	0.5051193	0.649	0.273	7.27E-71	Decidual Stroma 1 (M)	OMD
MYL9	3.12E-75	0.472481448	0.953	0.778	7.51E-71	Decidual Stroma 1 (M)	MYL9
TGM2	1.07E-74	0.449834283	0.897	0.605	2.58E-70	Decidual Stroma 1 (M)	TGM2
IGFBP4	1.16E-73	0.476865013	0.97	0.657	2.79E-69	Decidual Stroma 1 (M)	IGFBP4
RPL10	4.09E-73	0.313229342	0.993	0.994	9.82E-69	Decidual Stroma 1 (M)	RPL10
MARCKSL1	1.61E-72	0.536199335	0.664	0.349	3.87E-68	Decidual Stroma 1 (M)	MARCKSL1
RPL4	2.62E-71	0.413866804	0.93	0.868	6.29E-67	Decidual Stroma 1 (M)	RPL4
NBL1	9.95E-71	0.576162137	0.641	0.359	2.39E-66	Decidual Stroma 1 (M)	NBL1
PLEKHH2	1.04E-70	0.541960497	0.569	0.27	2.49E-66	Decidual Stroma 1 (M)	PLEKHH2
RPL36	1.36E-70	0.365733074	0.984	0.972	3.26E-66	Decidual Stroma 1 (M)	RPL36
RPL39	2.36E-70	0.364901667	0.986	0.978	5.67E-66	Decidual Stroma 1 (M)	RPL39
PSD3	1.06E-69	0.540642934	0.544	0.26	2.55E-65	Decidual Stroma 1 (M)	PSD3
MYL6	6.63E-69	0.367695528	0.986	0.969	1.59E-64	Decidual Stroma 1 (M)	MYL6
ACTB	7.25E-69	0.314286907	0.997	0.989	1.74E-64	Decidual Stroma 1 (M)	ACTB
MALAT1	1.68E-68	0.362135655	0.999	0.999	4.04E-64	Decidual Stroma 1 (M)	MALAT1
FOS	2.08E-68	0.38972122	0.996	0.951	5.00E-64	Decidual Stroma 1 (M)	FOS
ITM2B	2.93E-67	0.346306965	0.988	0.951	7.05E-63	Decidual Stroma 1 (M)	ITM2B
AC027288.3	3.41E-67	0.466658891	0.688	0.305	8.20E-63	Decidual Stroma 1 (M)	AC027288.3
SOD2	1.71E-66	0.484869448	0.873	0.628	4.10E-62	Decidual Stroma 1 (M)	SOD2
THBS2	8.52E-66	0.380144828	0.322	0.087	2.05E-61	Decidual Stroma 1 (M)	THBS2
DDAH2	1.31E-65	0.513982278	0.727	0.466	3.14E-61	Decidual Stroma 1 (M)	DDAH2
NFKBIA	2.28E-65	0.661312849	0.901	0.752	5.48E-61	Decidual Stroma 1 (M)	NFKBIA
RPL35A	2.56E-65	0.346776719	0.986	0.965	6.16E-61	Decidual Stroma 1 (M)	RPL35A
RPS5	4.37E-65	0.42151941	0.969	0.944	1.05E-60	Decidual Stroma 1 (M)	RPS5
IER2	4.69E-65	0.481283963	0.949	0.829	1.13E-60	Decidual Stroma 1 (M)	IER2
EIF1	6.74E-65	0.294759687	0.995	0.973	1.62E-60	Decidual Stroma 1 (M)	EIF1
RPS14	1.18E-64	0.337451754	0.99	0.981	2.82E-60	Decidual Stroma 1 (M)	RPS14
RPS3	3.92E-64	0.346635445	0.993	0.977	9.43E-60	Decidual Stroma 1 (M)	RPS3
VCL	1.45E-63	0.571811562	0.748	0.586	3.49E-59	Decidual Stroma 1 (M)	VCL
TWIST2	2.27E-63	0.541732734	0.603	0.317	5.45E-59	Decidual Stroma 1 (M)	TWIST2
EGR1	2.35E-63	0.463670976	0.948	0.772	5.64E-59	Decidual Stroma 1 (M)	EGR1
NDUFA4	7.95E-63	0.41591933	0.897	0.793	1.91E-58	Decidual Stroma 1 (M)	NDUFA4
RPL8	2.67E-62	0.330725643	0.987	0.981	6.42E-58	Decidual Stroma 1 (M)	RPL8
RPS12	8.42E-62	0.365945916	0.993	0.982	2.02E-57	Decidual Stroma 1 (M)	RPS12
EEF1B2	1.11E-61	0.455621183	0.884	0.827	2.68E-57	Decidual Stroma 1 (M)	EEF1B2
MAOB	1.85E-61	0.458068425	0.564	0.263	4.45E-57	Decidual Stroma 1 (M)	MAOB
ID4	2.52E-61	0.68701042	0.589	0.292	6.05E-57	Decidual Stroma 1 (M)	ID4
RPSA	7.36E-61	0.350192515	0.953	0.918	1.77E-56	Decidual Stroma 1 (M)	RPSA
MEDAG	1.19E-60	0.465100498	0.531	0.239	2.86E-56	Decidual Stroma 1 (M)	MEDAG
ADCY1	1.85E-60	0.342451967	0.32	0.098	4.45E-56	Decidual Stroma 1 (M)	ADCY1
DDX5	1.87E-60	0.365370883	0.984	0.927	4.48E-56	Decidual Stroma 1 (M)	DDX5
RPL18A	1.27E-59	0.387307222	0.984	0.976	3.04E-55	Decidual Stroma 1 (M)	RPL18A
ACTG1	1.17E-58	0.264492914	0.995	0.985	2.81E-54	Decidual Stroma 1 (M)	ACTG1
MCL1	2.56E-58	0.48599471	0.866	0.708	6.15E-54	Decidual Stroma 1 (M)	MCL1
PPP1R12B	2.77E-58	0.343289778	0.326	0.1	6.66E-54	Decidual Stroma 1 (M)	PPP1R12B
RPL31	3.20E-58	0.360828847	0.946	0.88	7.69E-54	Decidual Stroma 1 (M)	RPL31
EDNRA	3.43E-58	0.435891968	0.41	0.16	8.25E-54	Decidual Stroma 1 (M)	EDNRA
CFL2	5.45E-58	0.478685331	0.692	0.435	1.31E-53	Decidual Stroma 1 (M)	CFL2
TCEAL1	6.93E-58	0.393755008	0.439	0.186	1.67E-53	Decidual Stroma 1 (M)	TCEAL1
ZFP36	8.26E-58	0.456868154	0.928	0.792	1.98E-53	Decidual Stroma 1 (M)	ZFP36
APOE	1.40E-57	0.428434467	0.8	0.561	3.36E-53	Decidual Stroma 1 (M)	APOE
MMP2	1.84E-57	0.455387418	0.894	0.662	4.42E-53	Decidual Stroma 1 (M)	MMP2
RPS16	1.88E-57	0.345499508	0.971	0.952	4.52E-53	Decidual Stroma 1 (M)	RPS16
IGFBP5	2.63E-57	0.441514313	0.828	0.548	6.32E-53	Decidual Stroma 1 (M)	IGFBP5
PABPC1	3.52E-57	0.380783623	0.939	0.854	8.46E-53	Decidual Stroma 1 (M)	PABPC1
ALDH1A2	8.59E-57	0.415520241	0.556	0.258	2.06E-52	Decidual Stroma 1 (M)	ALDH1A2
CD44	1.38E-56	0.483635016	0.77	0.557	3.32E-52	Decidual Stroma 1 (M)	CD44
REV3L	1.66E-56	0.580649372	0.678	0.458	4.00E-52	Decidual Stroma 1 (M)	REV3L
PLPP1	2.06E-56	0.497042503	0.738	0.463	4.94E-52	Decidual Stroma 1 (M)	PLPP1
RPS15A	2.23E-56	0.319973498	0.977	0.963	5.35E-52	Decidual Stroma 1 (M)	RPS15A
RPL35	3.34E-56	0.32211109	0.974	0.954	8.03E-52	Decidual Stroma 1 (M)	RPL35
JUN	4.51E-56	0.364598531	0.988	0.943	1.08E-51	Decidual Stroma 1 (M)	JUN
RPLP0	6.85E-56	0.325021394	0.971	0.954	1.65E-51	Decidual Stroma 1 (M)	RPLP0
LDHB	1.36E-55	0.444977548	0.695	0.476	3.27E-51	Decidual Stroma 1 (M)	LDHB
JUNB	1.42E-55	0.420450717	0.97	0.897	3.41E-51	Decidual Stroma 1 (M)	JUNB
RPL21	7.41E-55	0.298460499	0.977	0.962	1.78E-50	Decidual Stroma 1 (M)	RPL21
LGALS3	1.08E-54	0.319186701	0.98	0.864	2.59E-50	Decidual Stroma 1 (M)	LGALS3
THBS1	2.93E-54	0.475173962	0.671	0.367	7.03E-50	Decidual Stroma 1 (M)	THBS1
SOD3	3.05E-54	0.460928326	0.683	0.423	7.33E-50	Decidual Stroma 1 (M)	SOD3
GREB1	4.03E-54	0.394280802	0.449	0.193	9.69E-50	Decidual Stroma 1 (M)	GREB1
PRPS2	4.91E-52	0.422089392	0.416	0.179	1.18E-47	Decidual Stroma 1 (M)	PRPS2
AR	5.33E-52	0.334646101	0.305	0.1	1.28E-47	Decidual Stroma 1 (M)	AR
LIMA1	8.04E-52	0.471198748	0.813	0.608	1.93E-47	Decidual Stroma 1 (M)	LIMA1
COL12A1	8.49E-52	0.331192469	0.364	0.132	2.04E-47	Decidual Stroma 1 (M)	COL12A1
PTN	9.04E-52	0.39742791	0.343	0.121	2.17E-47	Decidual Stroma 1 (M)	PTN
PODN	3.63E-51	0.307146292	0.332	0.115	8.73E-47	Decidual Stroma 1 (M)	PODN
RPS20	3.68E-51	0.332337822	0.937	0.88	8.84E-47	Decidual Stroma 1 (M)	RPS20
RPL23A	6.54E-51	0.28084486	0.975	0.962	1.57E-46	Decidual Stroma 1 (M)	RPL23A
CYP1B1	2.04E-50	0.478487306	0.409	0.173	4.90E-46	Decidual Stroma 1 (M)	CYP1B1
SORBS1	2.58E-49	0.356068574	0.35	0.138	6.19E-45	Decidual Stroma 1 (M)	SORBS1
HNMT	4.64E-49	0.332390511	0.332	0.122	1.12E-44	Decidual Stroma 1 (M)	HNMT
RPL38	2.11E-48	0.265891472	0.967	0.937	5.07E-44	Decidual Stroma 1 (M)	RPL38
RPL23	3.02E-48	0.280196874	0.969	0.928	7.27E-44	Decidual Stroma 1 (M)	RPL23
COMMD6	3.09E-48	0.392373327	0.791	0.658	7.42E-44	Decidual Stroma 1 (M)	COMMD6
CES1	9.42E-48	0.326515417	0.299	0.102	2.26E-43	Decidual Stroma 1 (M)	CES1
SPHK1	2.51E-47	0.428496991	0.522	0.266	6.04E-43	Decidual Stroma 1 (M)	SPHK1
FLNA	3.08E-47	0.435681101	0.837	0.745	7.40E-43	Decidual Stroma 1 (M)	FLNA
TGFB1I1	7.09E-47	0.452018647	0.671	0.493	1.71E-42	Decidual Stroma 1 (M)	TGFB1I1
CCNI	1.75E-45	0.360474426	0.898	0.824	4.21E-41	Decidual Stroma 1 (M)	CCNI
TSHZ2	3.04E-45	0.368121781	0.523	0.262	7.30E-41	Decidual Stroma 1 (M)	TSHZ2
NFKBIZ	3.15E-45	0.502631003	0.772	0.596	7.57E-41	Decidual Stroma 1 (M)	NFKBIZ
SSPN	5.28E-45	0.36092453	0.397	0.18	1.27E-40	Decidual Stroma 1 (M)	SSPN
MAPKAP1	2.19E-44	0.444203053	0.522	0.298	5.26E-40	Decidual Stroma 1 (M)	MAPKAP1
EMX2OS	3.60E-44	0.373824632	0.377	0.168	8.64E-40	Decidual Stroma 1 (M)	EMX2OS
GAS1	4.67E-44	0.360610422	0.809	0.484	1.12E-39	Decidual Stroma 1 (M)	GAS1
RORA	1.27E-43	0.352680898	0.393	0.181	3.05E-39	Decidual Stroma 1 (M)	RORA
RPS11	1.29E-43	0.281837854	0.965	0.941	3.09E-39	Decidual Stroma 1 (M)	RPS11
SH3BGRL	2.73E-43	0.398512934	0.715	0.539	6.56E-39	Decidual Stroma 1 (M)	SH3BGRL
SOX4	3.15E-43	0.597406489	0.601	0.354	7.58E-39	Decidual Stroma 1 (M)	SOX4
TUBA1A	1.24E-42	0.421661427	0.873	0.689	2.97E-38	Decidual Stroma 1 (M)	TUBA1A
RPL18	1.94E-42	0.287659569	0.982	0.971	4.67E-38	Decidual Stroma 1 (M)	RPL18
MEIS1	5.27E-42	0.406230386	0.432	0.219	1.27E-37	Decidual Stroma 1 (M)	MEIS1
NEXN	1.29E-41	0.312259988	0.398	0.176	3.09E-37	Decidual Stroma 1 (M)	NEXN
LEFTY2	1.76E-41	0.535298524	0.291	0.105	4.22E-37	Decidual Stroma 1 (M)	LEFTY2
PBX1	3.01E-41	0.3925981	0.578	0.355	7.23E-37	Decidual Stroma 1 (M)	PBX1
ZBTB20	4.98E-41	0.367709361	0.734	0.521	1.20E-36	Decidual Stroma 1 (M)	ZBTB20
HMGB1	6.17E-41	0.254347321	0.927	0.867	1.48E-36	Decidual Stroma 1 (M)	HMGB1
PAPPA	4.46E-40	0.432418194	0.775	0.466	1.07E-35	Decidual Stroma 1 (M)	PAPPA
RIN2	5.74E-40	0.503405321	0.466	0.254	1.38E-35	Decidual Stroma 1 (M)	RIN2
ADH5	2.32E-39	0.388774159	0.664	0.483	5.58E-35	Decidual Stroma 1 (M)	ADH5
NEAT1	3.08E-39	0.286377418	0.991	0.959	7.39E-35	Decidual Stroma 1 (M)	NEAT1
VCAN	3.66E-39	0.414297548	0.954	0.758	8.80E-35	Decidual Stroma 1 (M)	VCAN
GBP1	5.21E-39	0.461062472	0.578	0.357	1.25E-34	Decidual Stroma 1 (M)	GBP1
SYTL4	1.39E-38	0.376098189	0.482	0.259	3.35E-34	Decidual Stroma 1 (M)	SYTL4
OSBPL8	1.98E-38	0.409673049	0.668	0.472	4.76E-34	Decidual Stroma 1 (M)	OSBPL8
BTF3	3.51E-38	0.25944163	0.937	0.905	8.44E-34	Decidual Stroma 1 (M)	BTF3
ASPN	3.61E-38	0.359168651	0.27	0.097	8.67E-34	Decidual Stroma 1 (M)	ASPN
SPATS2	4.98E-38	0.355248805	0.439	0.234	1.20E-33	Decidual Stroma 1 (M)	SPATS2
DKK1	7.96E-38	0.44946672	0.744	0.517	1.91E-33	Decidual Stroma 1 (M)	DKK1
CKB	1.79E-37	0.625806194	0.518	0.333	4.31E-33	Decidual Stroma 1 (M)	CKB
ALDH1A3	2.49E-37	0.349871306	0.336	0.148	5.99E-33	Decidual Stroma 1 (M)	ALDH1A3
TNXB	2.57E-37	0.346116618	0.705	0.469	6.18E-33	Decidual Stroma 1 (M)	TNXB
SERPINF1	3.55E-37	0.287044507	0.918	0.659	8.52E-33	Decidual Stroma 1 (M)	SERPINF1
PLEKHO1	6.33E-37	0.345521135	0.462	0.252	1.52E-32	Decidual Stroma 1 (M)	PLEKHO1
MTRNR2L12	1.10E-36	0.405065694	0.897	0.726	2.64E-32	Decidual Stroma 1 (M)	MTRNR2L12
SDCBP	1.87E-36	0.369916906	0.719	0.534	4.51E-32	Decidual Stroma 1 (M)	SDCBP
ADGRE5	2.43E-36	0.284619066	0.324	0.14	5.85E-32	Decidual Stroma 1 (M)	ADGRE5
RPL30	3.10E-36	0.268249382	0.982	0.968	7.45E-32	Decidual Stroma 1 (M)	RPL30
SLC25A6	3.63E-36	0.291985302	0.866	0.799	8.73E-32	Decidual Stroma 1 (M)	SLC25A6
CD302	3.81E-36	0.392049947	0.369	0.179	9.17E-32	Decidual Stroma 1 (M)	CD302
NAA20	6.27E-36	0.359679209	0.666	0.464	1.51E-31	Decidual Stroma 1 (M)	NAA20
RPL26	9.30E-36	0.262593668	0.962	0.943	2.24E-31	Decidual Stroma 1 (M)	RPL26
ARHGAP10	2.16E-35	0.307817375	0.384	0.189	5.19E-31	Decidual Stroma 1 (M)	ARHGAP10
ST13	4.49E-35	0.288261028	0.92	0.799	1.08E-30	Decidual Stroma 1 (M)	ST13
LPP	1.08E-34	0.328845573	0.752	0.623	2.59E-30	Decidual Stroma 1 (M)	LPP
PFDN5	1.46E-34	0.280409252	0.899	0.868	3.52E-30	Decidual Stroma 1 (M)	PFDN5
MIR99AHG	3.93E-34	0.275027323	0.298	0.126	9.45E-30	Decidual Stroma 1 (M)	MIR99AHG
CDC42EP3	4.42E-34	0.461988103	0.547	0.357	1.06E-29	Decidual Stroma 1 (M)	CDC42EP3
PNRC1	5.77E-34	0.350088899	0.883	0.799	1.39E-29	Decidual Stroma 1 (M)	PNRC1
DEPP1	7.81E-34	0.455332099	0.581	0.352	1.88E-29	Decidual Stroma 1 (M)	DEPP1
YBX1	9.14E-34	0.254109041	0.926	0.867	2.20E-29	Decidual Stroma 1 (M)	YBX1
TTC39C	1.24E-33	0.263311	0.279	0.114	2.99E-29	Decidual Stroma 1 (M)	TTC39C
CTNNB1	1.73E-33	0.435571345	0.621	0.456	4.17E-29	Decidual Stroma 1 (M)	CTNNB1
FHL2	4.53E-33	0.318072385	0.492	0.29	1.09E-28	Decidual Stroma 1 (M)	FHL2
GBP2	8.72E-33	0.274385794	0.341	0.158	2.09E-28	Decidual Stroma 1 (M)	GBP2
NSA2	9.35E-32	0.326416241	0.824	0.701	2.25E-27	Decidual Stroma 1 (M)	NSA2
MORF4L2	1.21E-31	0.348626977	0.758	0.668	2.90E-27	Decidual Stroma 1 (M)	MORF4L2
GRAMD2B	2.68E-31	0.337194405	0.428	0.236	6.45E-27	Decidual Stroma 1 (M)	GRAMD2B
S100A13	1.37E-30	0.299244191	0.792	0.651	3.29E-26	Decidual Stroma 1 (M)	S100A13
NBN	1.37E-30	0.370775055	0.443	0.262	3.29E-26	Decidual Stroma 1 (M)	NBN
PEBP1	1.40E-30	0.303315506	0.817	0.685	3.38E-26	Decidual Stroma 1 (M)	PEBP1
SULF2	1.46E-30	0.319247909	0.711	0.482	3.52E-26	Decidual Stroma 1 (M)	SULF2
IMPA2	1.51E-30	0.440323836	0.479	0.305	3.62E-26	Decidual Stroma 1 (M)	IMPA2
PAPLN	1.86E-30	0.296625339	0.309	0.144	4.46E-26	Decidual Stroma 1 (M)	PAPLN
GPNMB	2.83E-30	0.310846327	0.456	0.257	6.81E-26	Decidual Stroma 1 (M)	GPNMB
EMILIN2	2.85E-30	0.269166005	0.606	0.344	6.86E-26	Decidual Stroma 1 (M)	EMILIN2
HAND2	2.91E-30	0.266400515	0.867	0.619	6.99E-26	Decidual Stroma 1 (M)	HAND2
HOXA10	3.19E-30	0.319933177	0.413	0.229	7.68E-26	Decidual Stroma 1 (M)	HOXA10
RPS7	3.58E-30	0.25398813	0.963	0.963	8.61E-26	Decidual Stroma 1 (M)	RPS7
DBN1	6.33E-30	0.294605658	0.427	0.239	1.52E-25	Decidual Stroma 1 (M)	DBN1
CEP126	6.50E-30	0.299244504	0.428	0.236	1.56E-25	Decidual Stroma 1 (M)	CEP126
COX6C	7.18E-30	0.288064289	0.914	0.807	1.72E-25	Decidual Stroma 1 (M)	COX6C
LCP1	1.24E-29	0.304612226	0.422	0.227	2.97E-25	Decidual Stroma 1 (M)	LCP1
CLIC4	2.12E-29	0.333009783	0.644	0.482	5.09E-25	Decidual Stroma 1 (M)	CLIC4
SELENOP	2.19E-29	0.272217952	0.804	0.647	5.27E-25	Decidual Stroma 1 (M)	SELENOP
PBXIP1	2.80E-29	0.38708287	0.522	0.342	6.73E-25	Decidual Stroma 1 (M)	PBXIP1
ADRA2C	4.43E-29	0.465162588	0.458	0.256	1.06E-24	Decidual Stroma 1 (M)	ADRA2C
HES4	5.06E-29	0.310676925	0.487	0.295	1.22E-24	Decidual Stroma 1 (M)	HES4
KANK2	7.72E-29	0.310421049	0.722	0.541	1.86E-24	Decidual Stroma 1 (M)	KANK2
TACC1	1.20E-28	0.305069203	0.641	0.466	2.88E-24	Decidual Stroma 1 (M)	TACC1
PDLIM7	2.85E-28	0.339603452	0.568	0.395	6.85E-24	Decidual Stroma 1 (M)	PDLIM7
RFTN1	5.80E-28	0.319554299	0.393	0.214	1.39E-23	Decidual Stroma 1 (M)	RFTN1
BAG2	8.20E-28	0.285534412	0.465	0.28	1.97E-23	Decidual Stroma 1 (M)	BAG2
IL15	9.89E-28	0.251108005	0.467	0.256	2.38E-23	Decidual Stroma 1 (M)	IL15
PLIN2	2.13E-27	0.296874834	0.632	0.461	5.11E-23	Decidual Stroma 1 (M)	PLIN2
HEBP2	2.59E-27	0.349155346	0.616	0.452	6.22E-23	Decidual Stroma 1 (M)	HEBP2
ZFP36L2	3.34E-27	0.436236773	0.77	0.655	8.04E-23	Decidual Stroma 1 (M)	ZFP36L2
ALDH7A1	5.71E-27	0.33017667	0.375	0.211	1.37E-22	Decidual Stroma 1 (M)	ALDH7A1
TCEAL3	5.97E-27	0.263463948	0.689	0.508	1.43E-22	Decidual Stroma 1 (M)	TCEAL3
ANTXR1	1.14E-26	0.37931548	0.644	0.45	2.74E-22	Decidual Stroma 1 (M)	ANTXR1
EIF1AX	3.95E-26	0.266348628	0.808	0.701	9.50E-22	Decidual Stroma 1 (M)	EIF1AX
C2	6.89E-26	0.2877817	0.426	0.248	1.66E-21	Decidual Stroma 1 (M)	C2
DHRS3	1.12E-25	0.273428241	0.547	0.322	2.70E-21	Decidual Stroma 1 (M)	DHRS3
OSGIN2	1.29E-25	0.266963178	0.27	0.126	3.10E-21	Decidual Stroma 1 (M)	OSGIN2
EIF3G	2.36E-25	0.265558631	0.73	0.61	5.67E-21	Decidual Stroma 1 (M)	EIF3G
PIK3R1	4.52E-25	0.270339785	0.594	0.383	1.09E-20	Decidual Stroma 1 (M)	PIK3R1
CYSTM1	6.08E-25	0.27143731	0.473	0.297	1.46E-20	Decidual Stroma 1 (M)	CYSTM1
MAFF	1.67E-24	0.445701299	0.501	0.35	4.01E-20	Decidual Stroma 1 (M)	MAFF
TCP1	2.29E-24	0.317710965	0.638	0.487	5.49E-20	Decidual Stroma 1 (M)	TCP1
JUND	5.75E-24	0.394756507	0.95	0.889	1.38E-19	Decidual Stroma 1 (M)	JUND
TNFAIP3	6.04E-24	0.546402522	0.427	0.268	1.45E-19	Decidual Stroma 1 (M)	TNFAIP3
CELF2	6.08E-24	0.272678172	0.433	0.26	1.46E-19	Decidual Stroma 1 (M)	CELF2
PPP1R15A	6.72E-24	0.315833882	0.851	0.789	1.62E-19	Decidual Stroma 1 (M)	PPP1R15A
PAWR	7.49E-24	0.343052055	0.439	0.274	1.80E-19	Decidual Stroma 1 (M)	PAWR
ABCA8	8.75E-24	0.285752136	0.286	0.143	2.10E-19	Decidual Stroma 1 (M)	ABCA8
HNRNPA1	1.07E-23	0.257931357	0.813	0.755	2.57E-19	Decidual Stroma 1 (M)	HNRNPA1
PEMT	1.41E-23	0.281497792	0.386	0.228	3.40E-19	Decidual Stroma 1 (M)	PEMT
PIM1	1.67E-23	0.357618277	0.463	0.307	4.01E-19	Decidual Stroma 1 (M)	PIM1
EIF3F	2.07E-23	0.267952668	0.7	0.605	4.98E-19	Decidual Stroma 1 (M)	EIF3F
MTRNR2L8	3.21E-23	0.342515075	0.872	0.704	7.72E-19	Decidual Stroma 1 (M)	MTRNR2L8
MXRA8	3.78E-23	0.291856584	0.766	0.604	9.08E-19	Decidual Stroma 1 (M)	MXRA8
RHOB	4.98E-23	0.314434456	0.821	0.69	1.20E-18	Decidual Stroma 1 (M)	RHOB
INSR	1.02E-22	0.282481734	0.555	0.372	2.45E-18	Decidual Stroma 1 (M)	INSR
PPP1R12A	1.05E-22	0.271896253	0.608	0.477	2.53E-18	Decidual Stroma 1 (M)	PPP1R12A
APEX1	1.42E-22	0.281055585	0.573	0.417	3.41E-18	Decidual Stroma 1 (M)	APEX1
PHF14	1.90E-22	0.264225284	0.439	0.278	4.58E-18	Decidual Stroma 1 (M)	PHF14
CBLB	2.29E-22	0.324530906	0.418	0.258	5.51E-18	Decidual Stroma 1 (M)	CBLB
BTG2	3.12E-22	0.328355841	0.599	0.446	7.49E-18	Decidual Stroma 1 (M)	BTG2
VCAM1	4.26E-22	0.326171201	0.548	0.388	1.02E-17	Decidual Stroma 1 (M)	VCAM1
GADD45A	4.43E-22	0.41842741	0.471	0.322	1.06E-17	Decidual Stroma 1 (M)	GADD45A
SNX9	5.38E-22	0.293902589	0.58	0.436	1.29E-17	Decidual Stroma 1 (M)	SNX9
RBMX	1.55E-21	0.358346245	0.73	0.595	3.72E-17	Decidual Stroma 1 (M)	RBMX
DDX21	2.44E-21	0.297711623	0.666	0.543	5.86E-17	Decidual Stroma 1 (M)	DDX21
METAP2	2.79E-21	0.332635361	0.795	0.665	6.71E-17	Decidual Stroma 1 (M)	METAP2
LITAF	5.35E-21	0.296485968	0.659	0.515	1.28E-16	Decidual Stroma 1 (M)	LITAF
MAP3K5	5.47E-21	0.265267096	0.437	0.255	1.32E-16	Decidual Stroma 1 (M)	MAP3K5
DUSP1	3.81E-20	0.289600235	0.953	0.868	9.16E-16	Decidual Stroma 1 (M)	DUSP1
IFI27L2	4.38E-20	0.251950977	0.594	0.44	1.05E-15	Decidual Stroma 1 (M)	IFI27L2
TCF7L2	4.94E-20	0.255467071	0.689	0.526	1.19E-15	Decidual Stroma 1 (M)	TCF7L2
XBP1	5.74E-20	0.276025419	0.774	0.681	1.38E-15	Decidual Stroma 1 (M)	XBP1
SOCS3	1.29E-19	0.291977665	0.772	0.678	3.11E-15	Decidual Stroma 1 (M)	SOCS3
MYC	1.51E-19	0.375965762	0.449	0.306	3.64E-15	Decidual Stroma 1 (M)	MYC
ZNF516	5.14E-19	0.257118198	0.324	0.189	1.24E-14	Decidual Stroma 1 (M)	ZNF516
PNRC2	2.30E-18	0.270916766	0.52	0.381	5.52E-14	Decidual Stroma 1 (M)	PNRC2
PLAT	5.23E-18	0.257359964	0.422	0.267	1.26E-13	Decidual Stroma 1 (M)	PLAT
TCIM	1.23E-17	0.351058934	0.351	0.215	2.96E-13	Decidual Stroma 1 (M)	TCIM
PPP1R14B	8.53E-17	0.280710226	0.614	0.48	2.05E-12	Decidual Stroma 1 (M)	PPP1R14B
KDM6B	1.60E-15	0.258361834	0.372	0.252	3.84E-11	Decidual Stroma 1 (M)	KDM6B
ARID5B	2.14E-15	0.262742812	0.85	0.765	5.15E-11	Decidual Stroma 1 (M)	ARID5B
BASP1	1.42E-14	0.276249243	0.97	0.771	3.41E-10	Decidual Stroma 1 (M)	BASP1
CEBPB	2.72E-12	0.296458003	0.778	0.643	6.54E-08	Decidual Stroma 1 (M)	CEBPB
TNFAIP2	1.53E-11	0.278864396	0.629	0.512	3.68E-07	Decidual Stroma 1 (M)	TNFAIP2
GADD45G	5.58E-11	0.296729925	0.444	0.312	1.34E-06	Decidual Stroma 1 (M)	GADD45G
IFIT1	7.31E-09	0.259525518	0.394	0.307	0.000175803	Decidual Stroma 1 (M)	IFIT1
RND3	6.30E-07	0.276621313	0.577	0.522	0.015138629	Decidual Stroma 1 (M)	RND3
C1QTNF6	8.10E-07	0.26319907	0.359	0.286	0.019460938	Decidual Stroma 1 (M)	C1QTNF6
ADAMTS4	4.59E-06	0.272903278	0.277	0.218	0.110266621	Decidual Stroma 1 (M)	ADAMTS4
SCARA5	4.79E-154	0.970668162	0.865	0.26	1.15E-149	Decidual Stroma 2 (M)	SCARA5
IGFBP61	6.25E-151	1.136596078	0.962	0.505	1.50E-146	Decidual Stroma 2 (M)	IGFBP6
PAPPA1	1.87E-142	1.120721233	0.956	0.467	4.50E-138	Decidual Stroma 2 (M)	PAPPA
EMILIN21	2.55E-136	0.855334311	0.882	0.327	6.12E-132	Decidual Stroma 2 (M)	EMILIN2
AC027288.31	3.02E-134	0.815794735	0.888	0.31	7.25E-130	Decidual Stroma 2 (M)	AC027288.3
CFD1	5.81E-132	1.086426271	0.987	0.688	1.40E-127	Decidual Stroma 2 (M)	CFD
CPXM11	2.26E-130	0.922303975	0.954	0.477	5.44E-126	Decidual Stroma 2 (M)	CPXM1
APOD1	4.19E-128	1.016593512	0.937	0.438	1.01E-123	Decidual Stroma 2 (M)	APOD
IGFBP41	2.24E-120	0.914410133	0.987	0.682	5.38E-116	Decidual Stroma 2 (M)	IGFBP4
RORB	2.01E-119	0.839962798	0.882	0.323	4.82E-115	Decidual Stroma 2 (M)	RORB
CAB39L	5.03E-119	0.74829531	0.764	0.241	1.21E-114	Decidual Stroma 2 (M)	CAB39L
IGFBP2	4.54E-117	1.071105861	0.945	0.443	1.09E-112	Decidual Stroma 2 (M)	IGFBP2
GAS11	3.81E-114	0.980497478	0.956	0.492	9.16E-110	Decidual Stroma 2 (M)	GAS1
GNG4	3.97E-112	0.597577117	0.611	0.165	9.54E-108	Decidual Stroma 2 (M)	GNG4
IL151	1.22E-110	0.653844028	0.731	0.237	2.94E-106	Decidual Stroma 2 (M)	IL15
RBP1	8.48E-110	0.811925518	0.958	0.505	2.04E-105	Decidual Stroma 2 (M)	RBP1
GADD45G1	2.82E-109	1.033536855	0.762	0.279	6.79E-105	Decidual Stroma 2 (M)	GADD45G
IGFBP51	1.80E-105	1.203475683	0.918	0.559	4.32E-101	Decidual Stroma 2 (M)	IGFBP5
TIMP3	8.76E-105	0.977443862	0.994	0.94	2.11E-100	Decidual Stroma 2 (M)	TIMP3
DKK11	2.53E-104	1.017340749	0.926	0.511	6.08E-100	Decidual Stroma 2 (M)	DKK1
IGFBP1	2.92E-104	1.02988224	0.819	0.327	7.03E-100	Decidual Stroma 2 (M)	IGFBP1
P2RY141	9.85E-104	0.72361157	0.762	0.273	2.37E-99	Decidual Stroma 2 (M)	P2RY14
MGST1	3.83E-103	0.703537795	0.817	0.299	9.21E-99	Decidual Stroma 2 (M)	MGST1
OMD1	8.55E-103	0.66723315	0.792	0.285	2.05E-98	Decidual Stroma 2 (M)	OMD
FOXO11	3.70E-102	0.708835883	0.872	0.392	8.89E-98	Decidual Stroma 2 (M)	FOXO1
LEFTY21	4.20E-102	0.965885511	0.459	0.097	1.01E-97	Decidual Stroma 2 (M)	LEFTY2
VCAN1	1.78E-99	0.77759615	0.992	0.769	4.29E-95	Decidual Stroma 2 (M)	VCAN
BTBD3	3.28E-99	0.781007135	0.827	0.343	7.89E-95	Decidual Stroma 2 (M)	BTBD3
TRPC4	1.98E-98	0.503259708	0.522	0.131	4.77E-94	Decidual Stroma 2 (M)	TRPC4
MAP3K51	8.56E-98	0.607397752	0.699	0.234	2.06E-93	Decidual Stroma 2 (M)	MAP3K5
ULK41	7.13E-97	0.591660695	0.798	0.296	1.71E-92	Decidual Stroma 2 (M)	ULK4
SPOCK11	2.07E-96	0.628326337	0.897	0.352	4.97E-92	Decidual Stroma 2 (M)	SPOCK1
CHST2	5.79E-96	0.624994785	0.771	0.274	1.39E-91	Decidual Stroma 2 (M)	CHST2
IRS21	6.93E-96	0.668658928	0.848	0.345	1.67E-91	Decidual Stroma 2 (M)	IRS2
PRDM1	9.33E-95	0.646188049	0.716	0.245	2.24E-90	Decidual Stroma 2 (M)	PRDM1
CHRDL1	8.90E-94	0.878969429	0.783	0.297	2.14E-89	Decidual Stroma 2 (M)	CHRDL1
WT1	2.68E-92	0.52903184	0.646	0.21	6.45E-88	Decidual Stroma 2 (M)	WT1
TGM21	1.35E-91	0.719550309	0.975	0.619	3.24E-87	Decidual Stroma 2 (M)	TGM2
TXNIP1	1.58E-90	0.642734915	0.994	0.828	3.81E-86	Decidual Stroma 2 (M)	TXNIP
HAND21	4.82E-90	0.699757215	0.956	0.628	1.16E-85	Decidual Stroma 2 (M)	HAND2
TMEM371	1.20E-89	0.579847003	0.768	0.296	2.88E-85	Decidual Stroma 2 (M)	TMEM37
PILRA	3.45E-89	0.628942742	0.604	0.191	8.28E-85	Decidual Stroma 2 (M)	PILRA
SERPING11	3.51E-89	0.632370451	0.975	0.796	8.44E-85	Decidual Stroma 2 (M)	SERPING1
TXN	1.61E-88	0.662339895	0.962	0.793	3.86E-84	Decidual Stroma 2 (M)	TXN
GLRX	2.98E-88	0.701052496	0.886	0.446	7.16E-84	Decidual Stroma 2 (M)	GLRX
RAMP11	3.89E-88	0.671188605	0.954	0.433	9.36E-84	Decidual Stroma 2 (M)	RAMP1
MMP21	1.31E-85	0.708976358	0.945	0.675	3.14E-81	Decidual Stroma 2 (M)	MMP2
EGFR	6.11E-85	0.668079175	0.811	0.375	1.47E-80	Decidual Stroma 2 (M)	EGFR
SAT1	1.76E-84	0.808521693	0.975	0.788	4.22E-80	Decidual Stroma 2 (M)	SAT1
RGS2	8.35E-84	0.770246287	0.634	0.217	2.01E-79	Decidual Stroma 2 (M)	RGS2
PALMD1	2.02E-80	0.633105953	0.827	0.363	4.85E-76	Decidual Stroma 2 (M)	PALMD
INSR1	6.29E-80	0.57544564	0.777	0.357	1.51E-75	Decidual Stroma 2 (M)	INSR
FAM89A	7.79E-80	0.651836654	0.804	0.358	1.87E-75	Decidual Stroma 2 (M)	FAM89A
ADRA2C1	8.53E-80	0.679303286	0.665	0.244	2.05E-75	Decidual Stroma 2 (M)	ADRA2C
ID41	2.81E-79	0.517954249	0.741	0.296	6.76E-75	Decidual Stroma 2 (M)	ID4
RGS22	1.25E-78	0.501926589	0.451	0.12	3.00E-74	Decidual Stroma 2 (M)	RGS22
C31	1.71E-78	0.670601891	0.842	0.4	4.10E-74	Decidual Stroma 2 (M)	C3
HTR2B	2.13E-78	0.472925578	0.514	0.15	5.12E-74	Decidual Stroma 2 (M)	HTR2B
AOX1	1.99E-77	0.506821953	0.465	0.129	4.78E-73	Decidual Stroma 2 (M)	AOX1
SLC7A8	3.30E-77	0.536328253	0.608	0.207	7.93E-73	Decidual Stroma 2 (M)	SLC7A8
GSN1	3.10E-76	0.657843041	0.941	0.71	7.46E-72	Decidual Stroma 2 (M)	GSN
FBLN11	9.34E-76	0.529340147	0.998	0.751	2.25E-71	Decidual Stroma 2 (M)	FBLN1
HAND2-AS1	9.42E-75	0.547025895	0.893	0.491	2.26E-70	Decidual Stroma 2 (M)	HAND2-AS1
LGALS31	1.25E-73	0.5035227	0.981	0.874	3.01E-69	Decidual Stroma 2 (M)	LGALS3
ALKAL2	4.04E-73	0.587197914	0.377	0.087	9.72E-69	Decidual Stroma 2 (M)	ALKAL2
SULF21	1.35E-72	0.565597995	0.88	0.478	3.24E-68	Decidual Stroma 2 (M)	SULF2
TCF7L21	2.44E-72	0.63145923	0.863	0.516	5.86E-68	Decidual Stroma 2 (M)	TCF7L2
GREB11	8.77E-72	0.478254455	0.568	0.198	2.11E-67	Decidual Stroma 2 (M)	GREB1
RASGRP2	1.42E-71	0.397618295	0.714	0.267	3.41E-67	Decidual Stroma 2 (M)	RASGRP2
PLPP11	1.52E-70	0.619319954	0.874	0.467	3.65E-66	Decidual Stroma 2 (M)	PLPP1
RAP1B	8.10E-70	0.583395852	0.933	0.683	1.95E-65	Decidual Stroma 2 (M)	RAP1B
BASP11	1.05E-69	0.575893394	0.987	0.786	2.52E-65	Decidual Stroma 2 (M)	BASP1
HSPB6	5.34E-69	0.520364996	0.958	0.585	1.28E-64	Decidual Stroma 2 (M)	HSPB6
CST31	6.75E-69	0.537181682	1	0.945	1.62E-64	Decidual Stroma 2 (M)	CST3
COX6C1	3.55E-68	0.530192478	0.968	0.809	8.53E-64	Decidual Stroma 2 (M)	COX6C
CBLB1	5.02E-68	0.424157062	0.623	0.243	1.21E-63	Decidual Stroma 2 (M)	CBLB
PLA2G7	5.74E-68	0.527822927	0.467	0.145	1.38E-63	Decidual Stroma 2 (M)	PLA2G7
CTSK1	8.18E-68	0.58309068	0.749	0.327	1.96E-63	Decidual Stroma 2 (M)	CTSK
LUM	2.08E-67	0.57465932	0.996	0.812	5.00E-63	Decidual Stroma 2 (M)	LUM
LCP11	4.97E-67	0.455138446	0.6	0.219	1.20E-62	Decidual Stroma 2 (M)	LCP1
PLEKHH21	8.98E-67	0.553267289	0.665	0.282	2.16E-62	Decidual Stroma 2 (M)	PLEKHH2
ADAMTS5	6.89E-65	0.673795403	0.886	0.515	1.66E-60	Decidual Stroma 2 (M)	ADAMTS5
TSKU	3.42E-63	0.560936275	0.747	0.369	8.22E-59	Decidual Stroma 2 (M)	TSKU
ENPEP	7.53E-63	0.325331983	0.417	0.12	1.81E-58	Decidual Stroma 2 (M)	ENPEP
LONRF21	1.35E-62	0.460914776	0.539	0.195	3.24E-58	Decidual Stroma 2 (M)	LONRF2
TWIST21	2.31E-62	0.465328622	0.709	0.327	5.56E-58	Decidual Stroma 2 (M)	TWIST2
PLAT1	4.60E-62	0.51071207	0.621	0.253	1.11E-57	Decidual Stroma 2 (M)	PLAT
ITGB8	8.11E-62	0.458060219	0.617	0.231	1.95E-57	Decidual Stroma 2 (M)	ITGB8
MAOB1	1.00E-61	0.413959735	0.678	0.273	2.41E-57	Decidual Stroma 2 (M)	MAOB
CHEK2	1.56E-61	0.385375535	0.451	0.144	3.75E-57	Decidual Stroma 2 (M)	CHEK2
CLEC2B	2.34E-61	0.533658941	0.752	0.38	5.61E-57	Decidual Stroma 2 (M)	CLEC2B
CD551	4.11E-61	0.535694666	0.808	0.442	9.87E-57	Decidual Stroma 2 (M)	CD55
RDH10	2.60E-60	0.507121864	0.651	0.286	6.26E-56	Decidual Stroma 2 (M)	RDH10
ISLR	6.34E-60	0.50443447	0.907	0.532	1.52E-55	Decidual Stroma 2 (M)	ISLR
TMSB4X1	1.13E-59	0.464633504	1	0.986	2.72E-55	Decidual Stroma 2 (M)	TMSB4X
ABHD5	1.86E-59	0.588304525	0.676	0.316	4.46E-55	Decidual Stroma 2 (M)	ABHD5
CD248	6.08E-59	0.446949875	0.899	0.53	1.46E-54	Decidual Stroma 2 (M)	CD248
FBXO321	7.29E-59	0.553214626	0.594	0.244	1.75E-54	Decidual Stroma 2 (M)	FBXO32
ALDH1A11	1.87E-58	0.50510908	0.705	0.33	4.49E-54	Decidual Stroma 2 (M)	ALDH1A1
CPB1	2.47E-58	0.631620189	0.415	0.12	5.93E-54	Decidual Stroma 2 (M)	CPB1
PIK3R11	1.86E-57	0.59347849	0.754	0.379	4.48E-53	Decidual Stroma 2 (M)	PIK3R1
PRLR	5.31E-57	0.492644681	0.882	0.49	1.28E-52	Decidual Stroma 2 (M)	PRLR
APLP2	6.72E-57	0.496391599	0.916	0.67	1.61E-52	Decidual Stroma 2 (M)	APLP2
C20orf271	7.13E-57	0.444774886	0.705	0.332	1.71E-52	Decidual Stroma 2 (M)	C20orf27
RGCC	2.10E-56	0.450098208	0.813	0.413	5.05E-52	Decidual Stroma 2 (M)	RGCC
LINC01358	9.33E-56	0.363760325	0.358	0.101	2.24E-51	Decidual Stroma 2 (M)	LINC01358
ACE	9.46E-56	0.320337844	0.373	0.108	2.27E-51	Decidual Stroma 2 (M)	ACE
EDNRA1	1.77E-55	0.379251397	0.486	0.171	4.27E-51	Decidual Stroma 2 (M)	EDNRA
DHRS31	8.25E-55	0.462475707	0.707	0.319	1.98E-50	Decidual Stroma 2 (M)	DHRS3
SPHK11	1.39E-54	0.453218448	0.625	0.273	3.33E-50	Decidual Stroma 2 (M)	SPHK1
DCN	5.11E-54	0.498905008	1	0.816	1.23E-49	Decidual Stroma 2 (M)	DCN
IL1R1	6.63E-54	0.487064148	0.916	0.618	1.59E-49	Decidual Stroma 2 (M)	IL1R1
SIPA1L2	7.65E-54	0.430468264	0.514	0.189	1.84E-49	Decidual Stroma 2 (M)	SIPA1L2
SPARCL11	2.70E-53	0.3292614	0.947	0.46	6.48E-49	Decidual Stroma 2 (M)	SPARCL1
MFGE8	1.14E-52	0.433251297	0.924	0.601	2.73E-48	Decidual Stroma 2 (M)	MFGE8
CHST7	1.74E-52	0.359365819	0.472	0.171	4.18E-48	Decidual Stroma 2 (M)	CHST7
CTSL	1.15E-51	0.461736424	0.956	0.743	2.77E-47	Decidual Stroma 2 (M)	CTSL
OSR21	2.49E-51	0.379204761	0.686	0.31	5.99E-47	Decidual Stroma 2 (M)	OSR2
LPAR1	2.52E-51	0.33915363	0.558	0.232	6.05E-47	Decidual Stroma 2 (M)	LPAR1
MLPH	8.05E-50	0.339939637	0.436	0.153	1.93E-45	Decidual Stroma 2 (M)	MLPH
PTPN13	1.44E-49	0.367302005	0.522	0.213	3.47E-45	Decidual Stroma 2 (M)	PTPN13
ALDH1A21	2.62E-49	0.357090128	0.648	0.271	6.29E-45	Decidual Stroma 2 (M)	ALDH1A2
CTSC1	4.10E-49	0.422246521	0.749	0.403	9.85E-45	Decidual Stroma 2 (M)	CTSC
AKAP131	5.87E-49	0.453348547	0.893	0.623	1.41E-44	Decidual Stroma 2 (M)	AKAP13
DTNA	6.39E-49	0.276954858	0.398	0.13	1.54E-44	Decidual Stroma 2 (M)	DTNA
OSGIN21	1.69E-48	0.308129066	0.381	0.123	4.07E-44	Decidual Stroma 2 (M)	OSGIN2
PCYOX1	3.07E-48	0.430986475	0.817	0.478	7.37E-44	Decidual Stroma 2 (M)	PCYOX1
EFHD11	3.38E-48	0.280645228	0.533	0.205	8.11E-44	Decidual Stroma 2 (M)	EFHD1
PLCL1	6.97E-48	0.334563843	0.451	0.162	1.67E-43	Decidual Stroma 2 (M)	PLCL1
PSAP	1.16E-47	0.389821208	0.989	0.846	2.78E-43	Decidual Stroma 2 (M)	PSAP
C1S1	2.40E-47	0.408521247	0.947	0.705	5.77E-43	Decidual Stroma 2 (M)	C1S
GALNT15	4.19E-47	0.322448322	0.535	0.213	1.01E-42	Decidual Stroma 2 (M)	GALNT15
C11orf961	4.56E-47	0.408315982	0.945	0.612	1.10E-42	Decidual Stroma 2 (M)	C11orf96
MCC	7.98E-47	0.39251668	0.672	0.346	1.92E-42	Decidual Stroma 2 (M)	MCC
PBXIP11	1.16E-46	0.40113941	0.667	0.337	2.78E-42	Decidual Stroma 2 (M)	PBXIP1
EIF11	1.20E-46	0.271781035	0.996	0.974	2.89E-42	Decidual Stroma 2 (M)	EIF1
THSD7A	2.51E-46	0.462993267	0.558	0.243	6.04E-42	Decidual Stroma 2 (M)	THSD7A
TNFAIP21	3.88E-46	0.496032895	0.815	0.496	9.33E-42	Decidual Stroma 2 (M)	TNFAIP2
CRISPLD2	4.13E-46	0.418225001	0.952	0.675	9.93E-42	Decidual Stroma 2 (M)	CRISPLD2
RIN21	4.20E-46	0.468598048	0.566	0.258	1.01E-41	Decidual Stroma 2 (M)	RIN2
TP53I3	4.37E-46	0.333683647	0.556	0.235	1.05E-41	Decidual Stroma 2 (M)	TP53I3
RFTN11	4.90E-46	0.355283387	0.512	0.213	1.18E-41	Decidual Stroma 2 (M)	RFTN1
EVA1C	1.04E-45	0.342731705	0.579	0.254	2.50E-41	Decidual Stroma 2 (M)	EVA1C
INAFM1	1.83E-45	0.331222278	0.682	0.327	4.40E-41	Decidual Stroma 2 (M)	INAFM1
MEDAG1	1.58E-44	0.463502399	0.566	0.259	3.80E-40	Decidual Stroma 2 (M)	MEDAG
CCDC170	3.18E-44	0.250306051	0.337	0.105	7.64E-40	Decidual Stroma 2 (M)	CCDC170
WNT4	7.32E-44	0.334234149	0.446	0.16	1.76E-39	Decidual Stroma 2 (M)	WNT4
TCEAL31	8.68E-44	0.434886817	0.829	0.504	2.09E-39	Decidual Stroma 2 (M)	TCEAL3
GLUL	1.15E-43	0.453467413	0.901	0.625	2.76E-39	Decidual Stroma 2 (M)	GLUL
METAP21	1.20E-43	0.478166267	0.926	0.658	2.89E-39	Decidual Stroma 2 (M)	METAP2
TBX3	1.47E-43	0.387461773	0.556	0.25	3.54E-39	Decidual Stroma 2 (M)	TBX3
S100A16	1.71E-43	0.392296652	0.825	0.545	4.12E-39	Decidual Stroma 2 (M)	S100A16
MDK1	3.75E-43	0.424799042	0.865	0.587	9.01E-39	Decidual Stroma 2 (M)	MDK
SYTL41	5.13E-43	0.373232565	0.577	0.265	1.23E-38	Decidual Stroma 2 (M)	SYTL4
RHOB1	5.71E-43	0.471022008	0.916	0.688	1.37E-38	Decidual Stroma 2 (M)	RHOB
NEAT11	5.89E-43	0.356577733	1	0.96	1.41E-38	Decidual Stroma 2 (M)	NEAT1
APOO	7.27E-43	0.372174817	0.467	0.185	1.75E-38	Decidual Stroma 2 (M)	APOO
RHOQ	1.36E-42	0.391857442	0.718	0.393	3.26E-38	Decidual Stroma 2 (M)	RHOQ
ABCA81	1.66E-42	0.279095841	0.394	0.14	4.00E-38	Decidual Stroma 2 (M)	ABCA8
CDKN1C	1.78E-42	0.622459872	0.853	0.553	4.27E-38	Decidual Stroma 2 (M)	CDKN1C
PGR1	1.78E-42	0.341402378	0.52	0.223	4.29E-38	Decidual Stroma 2 (M)	PGR
ADGRD1	1.82E-42	0.337740888	0.518	0.218	4.38E-38	Decidual Stroma 2 (M)	ADGRD1
GABARAPL1	4.29E-42	0.406923254	0.764	0.439	1.03E-37	Decidual Stroma 2 (M)	GABARAPL1
ZYX1	5.77E-42	0.369134517	0.84	0.533	1.39E-37	Decidual Stroma 2 (M)	ZYX
TRMT44	1.07E-41	0.322712032	0.444	0.177	2.58E-37	Decidual Stroma 2 (M)	TRMT44
ZSCAN16-AS1	1.50E-41	0.297724126	0.6	0.273	3.60E-37	Decidual Stroma 2 (M)	ZSCAN16-AS1
LAMA4	2.37E-41	0.370473244	0.813	0.462	5.70E-37	Decidual Stroma 2 (M)	LAMA4
SLC40A1	2.40E-41	0.533408895	0.688	0.367	5.76E-37	Decidual Stroma 2 (M)	SLC40A1
LGALS9	8.46E-41	0.38896815	0.587	0.271	2.03E-36	Decidual Stroma 2 (M)	LGALS9
FTH1	1.16E-40	0.289749818	1	0.99	2.78E-36	Decidual Stroma 2 (M)	FTH1
FYN	5.23E-40	0.34551959	0.676	0.37	1.26E-35	Decidual Stroma 2 (M)	FYN
ZEB1	5.43E-40	0.451480453	0.804	0.547	1.31E-35	Decidual Stroma 2 (M)	ZEB1
PDE8B	5.65E-40	0.291012047	0.255	0.07	1.36E-35	Decidual Stroma 2 (M)	PDE8B
DEPP11	6.81E-40	0.319918466	0.705	0.354	1.64E-35	Decidual Stroma 2 (M)	DEPP1
METRN	7.31E-40	0.338334093	0.657	0.337	1.76E-35	Decidual Stroma 2 (M)	METRN
PPP1R14A1	7.90E-40	0.309355462	0.718	0.364	1.90E-35	Decidual Stroma 2 (M)	PPP1R14A
PAPLN1	9.66E-40	0.253060297	0.396	0.146	2.32E-35	Decidual Stroma 2 (M)	PAPLN
C21	1.45E-39	0.338693945	0.528	0.249	3.48E-35	Decidual Stroma 2 (M)	C2
CTSB	3.33E-39	0.379126164	0.958	0.767	8.01E-35	Decidual Stroma 2 (M)	CTSB
TIMP2	3.75E-39	0.403871262	0.958	0.795	9.02E-35	Decidual Stroma 2 (M)	TIMP2
S100A6	4.12E-39	0.332462541	1	0.962	9.90E-35	Decidual Stroma 2 (M)	S100A6
ZNF330	6.13E-39	0.403165309	0.522	0.251	1.47E-34	Decidual Stroma 2 (M)	ZNF330
PPP1R14B1	1.27E-38	0.373573028	0.764	0.47	3.04E-34	Decidual Stroma 2 (M)	PPP1R14B
LIMA11	1.50E-38	0.383728594	0.865	0.618	3.59E-34	Decidual Stroma 2 (M)	LIMA1
RETREG1	1.91E-38	0.333322992	0.493	0.216	4.58E-34	Decidual Stroma 2 (M)	RETREG1
ING1	4.45E-38	0.376255514	0.547	0.258	1.07E-33	Decidual Stroma 2 (M)	ING1
NFKBIZ1	4.54E-38	0.466419542	0.857	0.599	1.09E-33	Decidual Stroma 2 (M)	NFKBIZ
ABCA1	7.06E-38	0.359542929	0.56	0.274	1.70E-33	Decidual Stroma 2 (M)	ABCA1
TMEM45A	2.22E-37	0.433353615	0.832	0.56	5.34E-33	Decidual Stroma 2 (M)	TMEM45A
SPTLC2	2.32E-37	0.345678999	0.615	0.321	5.58E-33	Decidual Stroma 2 (M)	SPTLC2
SPTSSA	2.54E-37	0.376670881	0.731	0.436	6.10E-33	Decidual Stroma 2 (M)	SPTSSA
NID1	3.01E-37	0.400515548	0.764	0.469	7.24E-33	Decidual Stroma 2 (M)	NID1
AVPI1	5.25E-37	0.308699073	0.387	0.153	1.26E-32	Decidual Stroma 2 (M)	AVPI1
KALRN	2.01E-36	0.29121543	0.488	0.213	4.83E-32	Decidual Stroma 2 (M)	KALRN
KREMEN1	3.41E-36	0.290105386	0.394	0.154	8.19E-32	Decidual Stroma 2 (M)	KREMEN1
SARAF	3.66E-36	0.366747939	0.947	0.745	8.79E-32	Decidual Stroma 2 (M)	SARAF
AES	3.83E-36	0.371726905	0.891	0.603	9.20E-32	Decidual Stroma 2 (M)	AES
PID1	5.28E-36	0.278630825	0.537	0.252	1.27E-31	Decidual Stroma 2 (M)	PID1
MMP14	1.14E-35	0.37805813	0.739	0.453	2.74E-31	Decidual Stroma 2 (M)	MMP14
CEP1261	2.16E-35	0.273656677	0.518	0.24	5.20E-31	Decidual Stroma 2 (M)	CEP126
NFE2L1	5.40E-35	0.426010009	0.808	0.51	1.30E-30	Decidual Stroma 2 (M)	NFE2L1
KDR	5.86E-35	0.422192697	0.404	0.166	1.41E-30	Decidual Stroma 2 (M)	KDR
MAMDC2	7.51E-35	0.274460011	0.337	0.124	1.80E-30	Decidual Stroma 2 (M)	MAMDC2
SCPEP1	8.84E-35	0.270168912	0.469	0.214	2.13E-30	Decidual Stroma 2 (M)	SCPEP1
NFE2L2	8.84E-35	0.35660986	0.859	0.598	2.13E-30	Decidual Stroma 2 (M)	NFE2L2
CHSY1	1.92E-34	0.441577229	0.587	0.327	4.60E-30	Decidual Stroma 2 (M)	CHSY1
SSR4	2.15E-34	0.313125067	0.952	0.8	5.16E-30	Decidual Stroma 2 (M)	SSR4
DDX24	4.68E-34	0.346631819	0.901	0.662	1.12E-29	Decidual Stroma 2 (M)	DDX24
NAA201	4.95E-34	0.405409233	0.728	0.472	1.19E-29	Decidual Stroma 2 (M)	NAA20
ANTXR11	5.50E-34	0.363840579	0.741	0.453	1.32E-29	Decidual Stroma 2 (M)	ANTXR1
PSD31	6.93E-34	0.307192085	0.558	0.282	1.67E-29	Decidual Stroma 2 (M)	PSD3
KCNK61	7.70E-34	0.385302901	0.739	0.467	1.85E-29	Decidual Stroma 2 (M)	KCNK6
XIST1	9.63E-34	0.259406748	0.869	0.496	2.32E-29	Decidual Stroma 2 (M)	XIST
BCL2	2.97E-33	0.269138368	0.345	0.13	7.13E-29	Decidual Stroma 2 (M)	BCL2
LITAF1	3.66E-33	0.349813848	0.768	0.512	8.79E-29	Decidual Stroma 2 (M)	LITAF
CFL21	3.94E-33	0.35218513	0.724	0.452	9.48E-29	Decidual Stroma 2 (M)	CFL2
MAOA	4.86E-33	0.313556362	0.491	0.223	1.17E-28	Decidual Stroma 2 (M)	MAOA
CD81	4.88E-33	0.335182016	0.983	0.896	1.17E-28	Decidual Stroma 2 (M)	CD81
GLIPR11	5.17E-33	0.261907261	0.535	0.259	1.24E-28	Decidual Stroma 2 (M)	GLIPR1
FOSL2	6.13E-33	0.341763808	0.8	0.522	1.47E-28	Decidual Stroma 2 (M)	FOSL2
LRRN4CL	7.22E-33	0.275730433	0.467	0.212	1.74E-28	Decidual Stroma 2 (M)	LRRN4CL
F2R	1.72E-32	0.332233413	0.636	0.33	4.13E-28	Decidual Stroma 2 (M)	F2R
IFI27	2.12E-32	0.352157185	0.954	0.722	5.10E-28	Decidual Stroma 2 (M)	IFI27
APBB1IP	2.86E-32	0.251658376	0.347	0.136	6.88E-28	Decidual Stroma 2 (M)	APBB1IP
DNAJB9	3.53E-32	0.32476943	0.592	0.322	8.48E-28	Decidual Stroma 2 (M)	DNAJB9
TCEAL41	4.11E-32	0.351610615	0.935	0.749	9.87E-28	Decidual Stroma 2 (M)	TCEAL4
NAV3	4.83E-32	0.25783565	0.32	0.121	1.16E-27	Decidual Stroma 2 (M)	NAV3
NFKBIA1	6.36E-32	0.446203547	0.928	0.761	1.53E-27	Decidual Stroma 2 (M)	NFKBIA
AL139393.2	6.41E-32	0.288805643	0.265	0.089	1.54E-27	Decidual Stroma 2 (M)	AL139393.2
SLC39A6	1.10E-31	0.361664192	0.714	0.438	2.65E-27	Decidual Stroma 2 (M)	SLC39A6
HEBP21	1.25E-31	0.317894099	0.714	0.452	3.01E-27	Decidual Stroma 2 (M)	HEBP2
ADAMTS41	1.45E-31	0.450707118	0.434	0.202	3.48E-27	Decidual Stroma 2 (M)	ADAMTS4
LRPAP1	1.48E-31	0.359673994	0.903	0.69	3.56E-27	Decidual Stroma 2 (M)	LRPAP1
PEBP11	3.18E-31	0.312504836	0.899	0.685	7.64E-27	Decidual Stroma 2 (M)	PEBP1
IFI27L21	5.21E-31	0.334213533	0.703	0.438	1.25E-26	Decidual Stroma 2 (M)	IFI27L2
SLC37A3	8.29E-31	0.268303403	0.48	0.234	1.99E-26	Decidual Stroma 2 (M)	SLC37A3
FERMT2	1.12E-30	0.399866894	0.867	0.652	2.69E-26	Decidual Stroma 2 (M)	FERMT2
TUBA1A1	1.13E-30	0.421774991	0.882	0.704	2.72E-26	Decidual Stroma 2 (M)	TUBA1A
SLC7A2	1.33E-30	0.252956752	0.278	0.097	3.21E-26	Decidual Stroma 2 (M)	SLC7A2
CEBPB1	1.68E-30	0.45054177	0.859	0.643	4.05E-26	Decidual Stroma 2 (M)	CEBPB
MTR	1.79E-30	0.283982255	0.629	0.362	4.30E-26	Decidual Stroma 2 (M)	MTR
SPON2	2.29E-30	0.360309372	0.901	0.648	5.51E-26	Decidual Stroma 2 (M)	SPON2
FAM155A	2.71E-30	0.275897747	0.337	0.134	6.52E-26	Decidual Stroma 2 (M)	FAM155A
MXRA7	5.17E-30	0.375856441	0.874	0.626	1.24E-25	Decidual Stroma 2 (M)	MXRA7
GPX4	6.65E-30	0.314272057	0.935	0.756	1.60E-25	Decidual Stroma 2 (M)	GPX4
TAF10	1.22E-29	0.273123917	0.648	0.386	2.92E-25	Decidual Stroma 2 (M)	TAF10
UBC	1.23E-29	0.275608965	0.981	0.934	2.95E-25	Decidual Stroma 2 (M)	UBC
REV3L1	1.27E-29	0.451306273	0.699	0.474	3.04E-25	Decidual Stroma 2 (M)	REV3L
CERS6	1.39E-29	0.284295113	0.469	0.224	3.33E-25	Decidual Stroma 2 (M)	CERS6
ADD3	1.96E-29	0.290479114	0.724	0.435	4.70E-25	Decidual Stroma 2 (M)	ADD3
DYNC2LI1	2.35E-28	0.267042787	0.408	0.191	5.65E-24	Decidual Stroma 2 (M)	DYNC2LI1
CFH	2.96E-28	0.317371376	0.48	0.236	7.11E-24	Decidual Stroma 2 (M)	CFH
S1PR3	3.02E-28	0.253033968	0.493	0.249	7.25E-24	Decidual Stroma 2 (M)	S1PR3
TUT7	3.67E-28	0.308602655	0.453	0.23	8.82E-24	Decidual Stroma 2 (M)	TUT7
CITED2	5.33E-28	0.389456484	0.832	0.571	1.28E-23	Decidual Stroma 2 (M)	CITED2
GRAMD2B1	5.60E-28	0.258021218	0.491	0.244	1.35E-23	Decidual Stroma 2 (M)	GRAMD2B
PCOLCE	5.87E-28	0.301397424	0.962	0.707	1.41E-23	Decidual Stroma 2 (M)	PCOLCE
VCAM11	6.04E-28	0.300601325	0.651	0.387	1.45E-23	Decidual Stroma 2 (M)	VCAM1
LRRC8A	6.31E-28	0.277728237	0.579	0.322	1.52E-23	Decidual Stroma 2 (M)	LRRC8A
NPW	8.06E-28	0.253785001	0.398	0.174	1.94E-23	Decidual Stroma 2 (M)	NPW
FNDC3A	1.63E-27	0.292413904	0.659	0.386	3.91E-23	Decidual Stroma 2 (M)	FNDC3A
ITGB5	2.29E-27	0.361966863	0.676	0.424	5.50E-23	Decidual Stroma 2 (M)	ITGB5
MXRA81	2.98E-27	0.269157455	0.861	0.605	7.16E-23	Decidual Stroma 2 (M)	MXRA8
CARHSP1	4.37E-27	0.276258822	0.785	0.537	1.05E-22	Decidual Stroma 2 (M)	CARHSP1
DNAJC3	6.84E-27	0.307526661	0.743	0.488	1.64E-22	Decidual Stroma 2 (M)	DNAJC3
XBP11	8.58E-27	0.324944122	0.876	0.675	2.06E-22	Decidual Stroma 2 (M)	XBP1
ALDH1A31	1.19E-26	0.255395844	0.362	0.161	2.86E-22	Decidual Stroma 2 (M)	ALDH1A3
S100A131	1.36E-26	0.281531917	0.893	0.649	3.27E-22	Decidual Stroma 2 (M)	S100A13
CELF21	1.83E-26	0.260460914	0.505	0.265	4.40E-22	Decidual Stroma 2 (M)	CELF2
CRYAB	1.97E-26	0.336026725	0.811	0.568	4.73E-22	Decidual Stroma 2 (M)	CRYAB
TMA7	2.50E-26	0.273085223	0.926	0.73	6.00E-22	Decidual Stroma 2 (M)	TMA7
STAT1	9.23E-26	0.301968131	0.752	0.509	2.22E-21	Decidual Stroma 2 (M)	STAT1
ARL4D	1.29E-25	0.30149166	0.482	0.258	3.11E-21	Decidual Stroma 2 (M)	ARL4D
NR4A11	2.03E-25	0.290982836	0.726	0.456	4.87E-21	Decidual Stroma 2 (M)	NR4A1
RHEB	2.21E-25	0.276833727	0.836	0.596	5.31E-21	Decidual Stroma 2 (M)	RHEB
RBBP6	3.32E-25	0.430727658	0.718	0.487	7.97E-21	Decidual Stroma 2 (M)	RBBP6
KANK21	1.13E-24	0.287011068	0.785	0.548	2.71E-20	Decidual Stroma 2 (M)	KANK2
CCDC68	1.72E-24	0.260322905	0.255	0.097	4.14E-20	Decidual Stroma 2 (M)	CCDC68
DUSP11	2.68E-24	0.287799383	0.987	0.871	6.43E-20	Decidual Stroma 2 (M)	DUSP1
ATP2B4	3.20E-24	0.29583941	0.773	0.524	7.69E-20	Decidual Stroma 2 (M)	ATP2B4
UCHL1	3.83E-24	0.34598297	0.326	0.148	9.21E-20	Decidual Stroma 2 (M)	UCHL1
PGD	4.22E-24	0.255122515	0.421	0.216	1.01E-19	Decidual Stroma 2 (M)	PGD
SH3BGRL3	5.22E-24	0.295321794	0.937	0.802	1.26E-19	Decidual Stroma 2 (M)	SH3BGRL3
CYP1B11	9.48E-24	0.35397556	0.398	0.195	2.28E-19	Decidual Stroma 2 (M)	CYP1B1
C1QTNF61	1.04E-23	0.399338835	0.488	0.274	2.50E-19	Decidual Stroma 2 (M)	C1QTNF6
OSBPL81	3.83E-23	0.268910124	0.703	0.484	9.21E-19	Decidual Stroma 2 (M)	OSBPL8
APCDD1	5.03E-23	0.272381298	0.482	0.26	1.21E-18	Decidual Stroma 2 (M)	APCDD1
TMCO1	6.98E-23	0.257555677	0.848	0.624	1.68E-18	Decidual Stroma 2 (M)	TMCO1
DDAH21	7.27E-23	0.274301588	0.726	0.488	1.75E-18	Decidual Stroma 2 (M)	DDAH2
SERP1	9.66E-23	0.302270696	0.876	0.656	2.32E-18	Decidual Stroma 2 (M)	SERP1
SH3PXD2B	1.40E-22	0.257671952	0.444	0.234	3.37E-18	Decidual Stroma 2 (M)	SH3PXD2B
11-Sep	2.40E-22	0.273661767	0.859	0.659	5.77E-18	Decidual Stroma 2 (M)	11-Sep
IL1B	2.70E-22	0.287784337	0.322	0.144	6.49E-18	Decidual Stroma 2 (M)	IL1B
RAB31	3.81E-22	0.274020493	0.815	0.572	9.15E-18	Decidual Stroma 2 (M)	RAB31
TPST1	7.73E-22	0.253946588	0.682	0.442	1.86E-17	Decidual Stroma 2 (M)	TPST1
ABI3BP	9.10E-22	0.277411648	0.775	0.538	2.19E-17	Decidual Stroma 2 (M)	ABI3BP
ATP13A3	9.24E-22	0.265829914	0.606	0.381	2.22E-17	Decidual Stroma 2 (M)	ATP13A3
IGF11	1.29E-21	0.338432729	0.514	0.28	3.10E-17	Decidual Stroma 2 (M)	IGF1
PDLIM1	2.76E-21	0.274355416	0.949	0.803	6.63E-17	Decidual Stroma 2 (M)	PDLIM1
CLTB	2.85E-21	0.262424623	0.798	0.59	6.86E-17	Decidual Stroma 2 (M)	CLTB
CDK2AP2	9.53E-21	0.274077341	0.509	0.305	2.29E-16	Decidual Stroma 2 (M)	CDK2AP2
ARID5B1	1.36E-20	0.273838827	0.931	0.761	3.26E-16	Decidual Stroma 2 (M)	ARID5B
PPFIA1	1.72E-20	0.254855592	0.541	0.326	4.13E-16	Decidual Stroma 2 (M)	PPFIA1
EEA1	2.43E-20	0.298697923	0.745	0.517	5.85E-16	Decidual Stroma 2 (M)	EEA1
EIF4A3	2.63E-20	0.31374207	0.648	0.436	6.32E-16	Decidual Stroma 2 (M)	EIF4A3
PAMR1	3.70E-20	0.271067309	0.676	0.443	8.89E-16	Decidual Stroma 2 (M)	PAMR1
HSD11B1	1.54E-19	0.369766171	0.309	0.14	3.69E-15	Decidual Stroma 2 (M)	HSD11B1
EIF1B	4.75E-19	0.276998438	0.699	0.501	1.14E-14	Decidual Stroma 2 (M)	EIF1B
CD83	9.69E-19	0.359295332	0.293	0.141	2.33E-14	Decidual Stroma 2 (M)	CD83
MANF	6.34E-18	0.264774515	0.733	0.527	1.52E-13	Decidual Stroma 2 (M)	MANF
H2AFZ	1.17E-17	0.364954189	0.851	0.647	2.80E-13	Decidual Stroma 2 (M)	H2AFZ
SOX41	1.86E-17	0.482100374	0.571	0.379	4.46E-13	Decidual Stroma 2 (M)	SOX4
IER21	1.47E-15	0.259652456	0.952	0.839	3.52E-11	Decidual Stroma 2 (M)	IER2
TNFAIP31	5.01E-15	0.319230137	0.446	0.279	1.20E-10	Decidual Stroma 2 (M)	TNFAIP3
PRL	0	2.187599902	0.812	0.027	0	Decidual Stroma 3 (M)	PRL
HSD11B11	0	1.643905111	0.782	0.063	0	Decidual Stroma 3 (M)	HSD11B1
WNT5A	0	1.557964304	0.862	0.162	0	Decidual Stroma 3 (M)	WNT5A
WNT41	0	1.318353323	0.822	0.097	0	Decidual Stroma 3 (M)	WNT4
PARM1	0	1.230500032	0.866	0.136	0	Decidual Stroma 3 (M)	PARM1
NDP	0	1.006329425	0.634	0.038	0	Decidual Stroma 3 (M)	NDP
LGR4	0	0.974960248	0.784	0.086	0	Decidual Stroma 3 (M)	LGR4
PRR15	0	0.948332021	0.597	0.016	0	Decidual Stroma 3 (M)	PRR15
ITGB81	2.84E-302	1.269763729	0.905	0.179	6.84E-298	Decidual Stroma 3 (M)	ITGB8
CPB11	1.24E-297	1.691722468	0.691	0.072	2.98E-293	Decidual Stroma 3 (M)	CPB1
IL1R2	9.38E-295	1.055797591	0.559	0.035	2.25E-290	Decidual Stroma 3 (M)	IL1R2
RGCC1	2.50E-294	2.149219967	0.994	0.378	6.00E-290	Decidual Stroma 3 (M)	RGCC
CHRDL11	1.04E-293	1.488704905	0.983	0.258	2.50E-289	Decidual Stroma 3 (M)	CHRDL1
SCARA51	8.11E-289	1.36476808	0.968	0.235	1.95E-284	Decidual Stroma 3 (M)	SCARA5
PDZK1IP1	7.53E-286	0.6638554	0.43	0.009	1.81E-281	Decidual Stroma 3 (M)	PDZK1IP1
APOA1	3.20E-277	1.152982249	0.504	0.027	7.70E-273	Decidual Stroma 3 (M)	APOA1
RASGRP21	1.37E-276	1.243517877	0.924	0.227	3.28E-272	Decidual Stroma 3 (M)	RASGRP2
FAM89A1	1.57E-276	1.381572309	0.979	0.323	3.77E-272	Decidual Stroma 3 (M)	FAM89A
IGFBP11	1.33E-267	2.11148742	0.981	0.294	3.21E-263	Decidual Stroma 3 (M)	IGFBP1
SERPINB2	3.32E-264	0.707083855	0.532	0.035	7.99E-260	Decidual Stroma 3 (M)	SERPINB2
SIPA1L21	3.40E-258	0.883209079	0.805	0.138	8.18E-254	Decidual Stroma 3 (M)	SIPA1L2
CD2481	3.86E-258	1.555852904	0.987	0.51	9.29E-254	Decidual Stroma 3 (M)	CD248
IL1RL1	5.98E-250	1.707019376	0.43	0.018	1.44E-245	Decidual Stroma 3 (M)	IL1RL1
GLRX1	1.12E-248	1.534033061	0.979	0.425	2.69E-244	Decidual Stroma 3 (M)	GLRX
TIMP31	1.40E-248	1.763986986	1	0.938	3.36E-244	Decidual Stroma 3 (M)	TIMP3
SPOCK2	4.79E-248	0.542744292	0.5	0.033	1.15E-243	Decidual Stroma 3 (M)	SPOCK2
MGST11	2.34E-243	1.194001306	0.938	0.272	5.62E-239	Decidual Stroma 3 (M)	MGST1
RORB1	2.23E-242	1.209699416	0.973	0.3	5.35E-238	Decidual Stroma 3 (M)	RORB
RBP11	1.73E-241	1.481610098	0.996	0.492	4.16E-237	Decidual Stroma 3 (M)	RBP1
SNX10	2.38E-241	0.793164338	0.767	0.136	5.72E-237	Decidual Stroma 3 (M)	SNX10
PRUNE2	4.45E-240	1.011379293	0.686	0.105	1.07E-235	Decidual Stroma 3 (M)	PRUNE2
IL1B1	1.21E-235	0.95676165	0.65	0.09	2.90E-231	Decidual Stroma 3 (M)	IL1B
SMOX	2.13E-233	0.673117497	0.604	0.071	5.13E-229	Decidual Stroma 3 (M)	SMOX
CHST21	2.06E-231	1.017878836	0.913	0.244	4.95E-227	Decidual Stroma 3 (M)	CHST2
ST3GAL5	1.04E-229	1.051956896	0.83	0.206	2.50E-225	Decidual Stroma 3 (M)	ST3GAL5
CAB39L1	4.23E-228	0.976967519	0.888	0.213	1.02E-223	Decidual Stroma 3 (M)	CAB39L
EPDR1	7.83E-228	0.684718584	0.703	0.113	1.88E-223	Decidual Stroma 3 (M)	EPDR1
APOO1	2.96E-225	0.831141621	0.744	0.137	7.12E-221	Decidual Stroma 3 (M)	APOO
F2R1	1.45E-223	1.051380179	0.911	0.282	3.49E-219	Decidual Stroma 3 (M)	F2R
TNFRSF21	3.40E-222	0.744176261	0.636	0.089	8.18E-218	Decidual Stroma 3 (M)	TNFRSF21
ING11	3.54E-221	0.907304732	0.85	0.206	8.52E-217	Decidual Stroma 3 (M)	ING1
CD82	9.40E-221	1.0854339	0.928	0.338	2.26E-216	Decidual Stroma 3 (M)	CD82
CPEB4	1.40E-219	1.013717385	0.856	0.207	3.38E-215	Decidual Stroma 3 (M)	CPEB4
ATP13A31	3.31E-216	1.402759017	0.924	0.328	7.97E-212	Decidual Stroma 3 (M)	ATP13A3
TMEM132C	1.11E-214	0.542651806	0.544	0.059	2.66E-210	Decidual Stroma 3 (M)	TMEM132C
ADGRD11	1.32E-213	0.777428442	0.801	0.169	3.17E-209	Decidual Stroma 3 (M)	ADGRD1
CHI3L2	2.79E-211	0.814748799	0.697	0.124	6.70E-207	Decidual Stroma 3 (M)	CHI3L2
TMEM45A1	3.13E-211	1.163986618	0.977	0.533	7.52E-207	Decidual Stroma 3 (M)	TMEM45A
SAT11	5.89E-207	1.453552756	1	0.781	1.41E-202	Decidual Stroma 3 (M)	SAT1
SLC40A11	7.96E-207	1.116521305	0.949	0.321	1.91E-202	Decidual Stroma 3 (M)	SLC40A1
HSPB61	1.18E-205	1.181641889	0.987	0.575	2.84E-201	Decidual Stroma 3 (M)	HSPB6
AC010457.1	1.82E-205	0.426318452	0.396	0.022	4.38E-201	Decidual Stroma 3 (M)	AC010457.1
PRLR1	2.26E-205	1.124485507	0.989	0.467	5.42E-201	Decidual Stroma 3 (M)	PRLR
BTBD31	3.54E-204	1.027802515	0.945	0.317	8.50E-200	Decidual Stroma 3 (M)	BTBD3
PRDM11	2.09E-200	0.853239731	0.854	0.216	5.03E-196	Decidual Stroma 3 (M)	PRDM1
SPOCK12	3.56E-200	1.111207366	0.956	0.334	8.56E-196	Decidual Stroma 3 (M)	SPOCK1
LINP1	6.62E-200	0.419224136	0.33	0.01	1.59E-195	Decidual Stroma 3 (M)	LINP1
OGN	2.88E-199	1.981286856	0.905	0.331	6.93E-195	Decidual Stroma 3 (M)	OGN
MRPS6	1.99E-196	1.189095586	0.958	0.495	4.79E-192	Decidual Stroma 3 (M)	MRPS6
MAOA1	1.75E-195	0.766445547	0.775	0.174	4.21E-191	Decidual Stroma 3 (M)	MAOA
TWISTNB	2.31E-191	1.47180817	0.847	0.292	5.54E-187	Decidual Stroma 3 (M)	TWISTNB
IGFBP21	5.55E-190	1.307538687	0.983	0.43	1.33E-185	Decidual Stroma 3 (M)	IGFBP2
ALDH1A22	3.71E-189	0.832363871	0.862	0.231	8.91E-185	Decidual Stroma 3 (M)	ALDH1A2
MRPL33	9.77E-189	1.243136513	0.968	0.506	2.35E-184	Decidual Stroma 3 (M)	MRPL33
RGS21	4.26E-188	0.96377297	0.778	0.187	1.02E-183	Decidual Stroma 3 (M)	RGS2
HAND2-AS11	2.08E-186	0.977269666	0.979	0.471	5.00E-182	Decidual Stroma 3 (M)	HAND2-AS1
CD59	7.82E-184	1.038353129	0.991	0.703	1.88E-179	Decidual Stroma 3 (M)	CD59
WT11	3.61E-182	0.666497771	0.78	0.182	8.68E-178	Decidual Stroma 3 (M)	WT1
PLA2G71	3.07E-180	0.625561051	0.642	0.112	7.39E-176	Decidual Stroma 3 (M)	PLA2G7
CCDC69	1.23E-178	0.637648072	0.684	0.135	2.95E-174	Decidual Stroma 3 (M)	CCDC69
DCN1	7.00E-177	0.818343311	1	0.813	1.68E-172	Decidual Stroma 3 (M)	DCN
DKK12	1.58E-175	1.178157641	0.992	0.494	3.80E-171	Decidual Stroma 3 (M)	DKK1
DHRS32	9.83E-175	0.854260809	0.881	0.286	2.36E-170	Decidual Stroma 3 (M)	DHRS3
IRS22	1.01E-172	0.901996614	0.936	0.323	2.43E-168	Decidual Stroma 3 (M)	IRS2
METRN1	6.54E-172	0.87687046	0.883	0.296	1.57E-167	Decidual Stroma 3 (M)	METRN
CREG1	6.78E-172	0.802428051	0.765	0.212	1.63E-167	Decidual Stroma 3 (M)	CREG1
SLC31A2	4.26E-170	0.527907851	0.566	0.092	1.02E-165	Decidual Stroma 3 (M)	SLC31A2
C11orf86	2.01E-169	0.319128437	0.269	0.007	4.84E-165	Decidual Stroma 3 (M)	C11orf86
P4HA3	3.13E-169	0.640128633	0.625	0.122	7.52E-165	Decidual Stroma 3 (M)	P4HA3
INAFM11	8.62E-169	0.867607207	0.869	0.292	2.07E-164	Decidual Stroma 3 (M)	INAFM1
BABAM2	8.93E-169	0.743943654	0.725	0.18	2.15E-164	Decidual Stroma 3 (M)	BABAM2
AC027288.32	1.79E-168	0.81877453	0.92	0.296	4.31E-164	Decidual Stroma 3 (M)	AC027288.3
KALRN1	1.33E-167	0.601880381	0.731	0.17	3.19E-163	Decidual Stroma 3 (M)	KALRN
SOAT1	5.92E-167	0.678967229	0.712	0.176	1.42E-162	Decidual Stroma 3 (M)	SOAT1
AADACL2	1.03E-166	0.411679083	0.366	0.027	2.47E-162	Decidual Stroma 3 (M)	AADACL2
TGM22	1.17E-165	1.186011374	0.992	0.61	2.80E-161	Decidual Stroma 3 (M)	TGM2
ABI3BP1	1.74E-164	1.277618528	0.97	0.504	4.19E-160	Decidual Stroma 3 (M)	ABI3BP
LINC00707	7.44E-163	0.283479452	0.254	0.006	1.79E-158	Decidual Stroma 3 (M)	LINC00707
CRYAB1	9.42E-163	1.110562706	0.964	0.54	2.26E-158	Decidual Stroma 3 (M)	CRYAB
NPC2	1.29E-162	1.061319815	0.973	0.642	3.10E-158	Decidual Stroma 3 (M)	NPC2
LSAMP	1.63E-162	0.457508848	0.489	0.066	3.92E-158	Decidual Stroma 3 (M)	LSAMP
NFASC	1.71E-162	0.472010894	0.494	0.067	4.12E-158	Decidual Stroma 3 (M)	NFASC
FTH11	9.86E-162	0.736386334	1	0.99	2.37E-157	Decidual Stroma 3 (M)	FTH1
CNR1	1.24E-160	0.503878917	0.506	0.072	2.97E-156	Decidual Stroma 3 (M)	CNR1
GNG41	1.34E-160	0.569796462	0.682	0.147	3.21E-156	Decidual Stroma 3 (M)	GNG4
ISLR1	6.40E-158	0.89984708	0.956	0.518	1.54E-153	Decidual Stroma 3 (M)	ISLR
MAP3K52	8.15E-158	0.677995725	0.79	0.213	1.96E-153	Decidual Stroma 3 (M)	MAP3K5
HTR2B1	2.39E-155	0.585413615	0.625	0.127	5.75E-151	Decidual Stroma 3 (M)	HTR2B
PAM	5.19E-155	0.782941527	0.866	0.32	1.25E-150	Decidual Stroma 3 (M)	PAM
MGLL	8.25E-155	0.810745821	0.907	0.401	1.98E-150	Decidual Stroma 3 (M)	MGLL
KCNK3	4.58E-154	0.4556383	0.506	0.077	1.10E-149	Decidual Stroma 3 (M)	KCNK3
CDA	6.00E-154	0.421212437	0.348	0.028	1.44E-149	Decidual Stroma 3 (M)	CDA
CABCOCO1	1.32E-153	0.376193261	0.352	0.029	3.18E-149	Decidual Stroma 3 (M)	CABCOCO1
FKBP1B	1.75E-152	0.466576268	0.491	0.074	4.21E-148	Decidual Stroma 3 (M)	FKBP1B
RXFP1	8.89E-152	0.51334775	0.402	0.044	2.14E-147	Decidual Stroma 3 (M)	RXFP1
LUM1	1.28E-150	0.838487033	0.998	0.809	3.07E-146	Decidual Stroma 3 (M)	LUM
TREM1	1.08E-149	0.294997639	0.343	0.028	2.60E-145	Decidual Stroma 3 (M)	TREM1
ATP8A2	2.13E-148	0.368679665	0.343	0.029	5.13E-144	Decidual Stroma 3 (M)	ATP8A2
SEC11C	3.80E-148	0.678379668	0.695	0.18	9.13E-144	Decidual Stroma 3 (M)	SEC11C
CITED21	1.92E-147	1.046268177	0.958	0.547	4.62E-143	Decidual Stroma 3 (M)	CITED2
RAP1B1	5.76E-147	0.797722258	0.979	0.672	1.39E-142	Decidual Stroma 3 (M)	RAP1B
KIAA0040	1.01E-146	0.724242873	0.631	0.145	2.44E-142	Decidual Stroma 3 (M)	KIAA0040
ABHD51	2.95E-146	0.824446909	0.837	0.285	7.08E-142	Decidual Stroma 3 (M)	ABHD5
CD811	4.76E-146	0.960229336	0.991	0.893	1.14E-141	Decidual Stroma 3 (M)	CD81
IL1R11	1.94E-145	0.838206937	0.973	0.604	4.67E-141	Decidual Stroma 3 (M)	IL1R1
TRMT441	3.14E-145	0.559269945	0.636	0.142	7.54E-141	Decidual Stroma 3 (M)	TRMT44
GAS12	3.93E-145	0.96033101	0.966	0.483	9.45E-141	Decidual Stroma 3 (M)	GAS1
RETREG11	6.32E-145	0.555313205	0.699	0.179	1.52E-140	Decidual Stroma 3 (M)	RETREG1
APCDD11	8.57E-145	0.780514895	0.741	0.215	2.06E-140	Decidual Stroma 3 (M)	APCDD1
ADRA2C2	1.88E-144	0.672091445	0.794	0.218	4.52E-140	Decidual Stroma 3 (M)	ADRA2C
IGFBP42	6.35E-144	0.920061444	0.998	0.675	1.53E-139	Decidual Stroma 3 (M)	IGFBP4
OMD2	1.66E-143	0.792166313	0.841	0.269	3.98E-139	Decidual Stroma 3 (M)	OMD
CRYGN	1.86E-142	0.316085001	0.366	0.036	4.48E-138	Decidual Stroma 3 (M)	CRYGN
KREMEN11	1.98E-142	0.474687856	0.585	0.12	4.77E-138	Decidual Stroma 3 (M)	KREMEN1
PIK3R12	2.11E-142	0.77728333	0.898	0.351	5.07E-138	Decidual Stroma 3 (M)	PIK3R1
DIRAS2	3.45E-142	0.323149866	0.254	0.011	8.29E-138	Decidual Stroma 3 (M)	DIRAS2
SLC7A81	1.59E-141	0.629519017	0.714	0.185	3.83E-137	Decidual Stroma 3 (M)	SLC7A8
GPX41	2.73E-141	0.741503704	0.985	0.745	6.56E-137	Decidual Stroma 3 (M)	GPX4
PALMD2	4.78E-141	0.739175012	0.939	0.338	1.15E-136	Decidual Stroma 3 (M)	PALMD
AOX11	3.37E-140	0.488392588	0.559	0.109	8.10E-136	Decidual Stroma 3 (M)	AOX1
ZSCAN16-AS11	7.60E-140	0.612621435	0.782	0.239	1.83E-135	Decidual Stroma 3 (M)	ZSCAN16-AS1
SEMA3A	1.19E-139	0.796058021	0.525	0.096	2.87E-135	Decidual Stroma 3 (M)	SEMA3A
AADAC	9.13E-139	0.346225003	0.273	0.015	2.19E-134	Decidual Stroma 3 (M)	AADAC
ATP2B41	2.49E-138	0.819520294	0.932	0.495	5.98E-134	Decidual Stroma 3 (M)	ATP2B4
AES1	4.36E-138	0.762806849	0.97	0.586	1.05E-133	Decidual Stroma 3 (M)	AES
CTSL1	3.27E-137	0.924462943	0.97	0.738	7.87E-133	Decidual Stroma 3 (M)	CTSL
METTL27	6.85E-137	0.395479232	0.481	0.078	1.65E-132	Decidual Stroma 3 (M)	METTL27
HAND22	1.42E-136	0.822442742	0.983	0.618	3.40E-132	Decidual Stroma 3 (M)	HAND2
KRT23	3.20E-136	0.291507158	0.29	0.02	7.69E-132	Decidual Stroma 3 (M)	KRT23
THY1	4.51E-136	1.030193238	0.977	0.611	1.08E-131	Decidual Stroma 3 (M)	THY1
MAOB2	1.87E-135	0.668055977	0.795	0.248	4.49E-131	Decidual Stroma 3 (M)	MAOB
SLC5A3	3.81E-135	0.843922122	0.826	0.321	9.15E-131	Decidual Stroma 3 (M)	SLC5A3
LGALS32	4.60E-135	0.780770778	1	0.869	1.10E-130	Decidual Stroma 3 (M)	LGALS3
LCP12	7.47E-135	0.526103767	0.727	0.193	1.80E-130	Decidual Stroma 3 (M)	LCP1
MFSD2B	5.91E-134	0.311087927	0.343	0.034	1.42E-129	Decidual Stroma 3 (M)	MFSD2B
MFGE81	1.02E-133	0.745042777	0.968	0.589	2.46E-129	Decidual Stroma 3 (M)	MFGE8
COX7A1	1.17E-133	0.786739125	0.956	0.554	2.81E-129	Decidual Stroma 3 (M)	COX7A1
PCYOX11	1.96E-132	0.735288618	0.922	0.456	4.71E-128	Decidual Stroma 3 (M)	PCYOX1
CTSB1	2.14E-132	0.700633296	0.985	0.76	5.14E-128	Decidual Stroma 3 (M)	CTSB
MT-CO1	3.87E-131	0.541831415	0.989	0.996	9.30E-127	Decidual Stroma 3 (M)	MT-CO1
MXRA71	8.05E-131	1.030805446	0.977	0.606	1.93E-126	Decidual Stroma 3 (M)	MXRA7
THSD7A1	1.65E-130	0.650203564	0.737	0.21	3.96E-126	Decidual Stroma 3 (M)	THSD7A
TP53I31	2.54E-130	0.588490983	0.699	0.208	6.09E-126	Decidual Stroma 3 (M)	TP53I3
LRPAP11	2.83E-130	0.872737674	0.939	0.68	6.80E-126	Decidual Stroma 3 (M)	LRPAP1
EVA1C1	6.39E-130	0.574999467	0.737	0.224	1.54E-125	Decidual Stroma 3 (M)	EVA1C
CSF3R	7.13E-130	0.493967511	0.43	0.066	1.71E-125	Decidual Stroma 3 (M)	CSF3R
CD68	1.54E-128	0.706682005	0.809	0.308	3.69E-124	Decidual Stroma 3 (M)	CD68
GALNT151	4.36E-128	0.51682968	0.686	0.184	1.05E-123	Decidual Stroma 3 (M)	GALNT15
CLEC2D	8.63E-128	0.435652982	0.381	0.051	2.07E-123	Decidual Stroma 3 (M)	CLEC2D
FAM155A1	3.63E-127	0.451486302	0.519	0.102	8.72E-123	Decidual Stroma 3 (M)	FAM155A
TBX31	7.28E-127	0.586505885	0.729	0.218	1.75E-122	Decidual Stroma 3 (M)	TBX3
DCBLD1	3.78E-126	0.38754717	0.479	0.088	9.09E-122	Decidual Stroma 3 (M)	DCBLD1
GADD45G2	9.04E-126	0.881253229	0.78	0.269	2.17E-121	Decidual Stroma 3 (M)	GADD45G
PROK1	9.12E-126	0.675057078	0.494	0.1	2.19E-121	Decidual Stroma 3 (M)	PROK1
SMIM14	7.43E-125	0.68632659	0.858	0.365	1.79E-120	Decidual Stroma 3 (M)	SMIM14
TIMP21	8.12E-125	0.764487848	0.985	0.788	1.95E-120	Decidual Stroma 3 (M)	TIMP2
SEMA5A	1.36E-124	0.624976034	0.759	0.26	3.26E-120	Decidual Stroma 3 (M)	SEMA5A
APOD2	7.47E-124	0.852826017	0.962	0.426	1.80E-119	Decidual Stroma 3 (M)	APOD
RBP4	3.10E-123	1.939868915	0.356	0.046	7.46E-119	Decidual Stroma 3 (M)	RBP4
LINC00467	3.75E-123	0.331496145	0.39	0.054	9.01E-119	Decidual Stroma 3 (M)	LINC00467
MLPH1	1.06E-122	0.440318177	0.57	0.127	2.56E-118	Decidual Stroma 3 (M)	MLPH
NFE2L11	3.45E-122	0.852850507	0.943	0.484	8.28E-118	Decidual Stroma 3 (M)	NFE2L1
PLPP3	4.25E-121	0.879076087	0.943	0.497	1.02E-116	Decidual Stroma 3 (M)	PLPP3
IGSF10	1.68E-120	0.449312608	0.326	0.036	4.03E-116	Decidual Stroma 3 (M)	IGSF10
EGFR1	4.87E-120	0.79058309	0.831	0.365	1.17E-115	Decidual Stroma 3 (M)	EGFR
CPXM12	2.94E-119	0.742871616	0.958	0.469	7.07E-115	Decidual Stroma 3 (M)	CPXM1
PCBD1	4.49E-119	0.69955435	0.799	0.305	1.08E-114	Decidual Stroma 3 (M)	PCBD1
PLCL11	9.33E-119	0.487273349	0.578	0.137	2.24E-114	Decidual Stroma 3 (M)	PLCL1
SPTSSA1	2.17E-118	0.697029023	0.867	0.41	5.21E-114	Decidual Stroma 3 (M)	SPTSSA
CYP11A1	2.35E-118	0.309589668	0.402	0.061	5.65E-114	Decidual Stroma 3 (M)	CYP11A1
SEMA3B	1.74E-117	0.642492614	0.741	0.26	4.19E-113	Decidual Stroma 3 (M)	SEMA3B
PSAP1	2.79E-116	0.62557213	0.985	0.845	6.71E-112	Decidual Stroma 3 (M)	PSAP
EMILIN22	7.84E-116	0.663283123	0.837	0.326	1.89E-111	Decidual Stroma 3 (M)	EMILIN2
HIST1H2AC	1.29E-115	0.393385659	0.424	0.074	3.10E-111	Decidual Stroma 3 (M)	HIST1H2AC
GREB1L	1.75E-115	0.256409405	0.328	0.038	4.21E-111	Decidual Stroma 3 (M)	GREB1L
CHST3	5.15E-115	0.394696384	0.511	0.11	1.24E-110	Decidual Stroma 3 (M)	CHST3
CDKN1C1	1.89E-114	0.887566461	0.951	0.533	4.54E-110	Decidual Stroma 3 (M)	CDKN1C
HIST1H1C	3.60E-114	0.464478987	0.466	0.092	8.65E-110	Decidual Stroma 3 (M)	HIST1H1C
ATP6V0E1	1.04E-113	0.658358299	0.966	0.71	2.51E-109	Decidual Stroma 3 (M)	ATP6V0E1
ADAMTS51	2.89E-113	0.827732407	0.941	0.5	6.95E-109	Decidual Stroma 3 (M)	ADAMTS5
HIGD1A	3.46E-113	0.546136378	0.756	0.266	8.32E-109	Decidual Stroma 3 (M)	HIGD1A
RAI2	4.87E-113	0.35832782	0.477	0.094	1.17E-108	Decidual Stroma 3 (M)	RAI2
PGD1	6.15E-112	0.450503468	0.64	0.179	1.48E-107	Decidual Stroma 3 (M)	PGD
IL152	2.30E-110	0.530177353	0.723	0.231	5.53E-106	Decidual Stroma 3 (M)	IL15
S100A61	3.68E-110	0.594770065	1	0.961	8.84E-106	Decidual Stroma 3 (M)	S100A6
PLPP12	5.21E-109	0.6984969	0.926	0.453	1.25E-104	Decidual Stroma 3 (M)	PLPP1
SARAF1	7.11E-109	0.60397584	0.983	0.736	1.71E-104	Decidual Stroma 3 (M)	SARAF
CCL8	7.69E-109	0.47390633	0.278	0.028	1.85E-104	Decidual Stroma 3 (M)	CCL8
MDM1	9.51E-109	0.347151643	0.458	0.091	2.29E-104	Decidual Stroma 3 (M)	MDM1
PDLIM11	5.96E-108	0.623927335	0.985	0.796	1.43E-103	Decidual Stroma 3 (M)	PDLIM1
TNFAIP22	6.46E-108	0.675244659	0.924	0.474	1.55E-103	Decidual Stroma 3 (M)	TNFAIP2
MT-CO3	6.71E-108	0.439625375	0.991	0.997	1.61E-103	Decidual Stroma 3 (M)	MT-CO3
FKBP2	1.68E-107	0.684910057	0.955	0.636	4.04E-103	Decidual Stroma 3 (M)	FKBP2
CMC1	3.14E-107	0.47888053	0.591	0.163	7.54E-103	Decidual Stroma 3 (M)	CMC1
NPW1	4.73E-106	0.721552572	0.544	0.147	1.14E-101	Decidual Stroma 3 (M)	NPW
FERMT21	1.58E-103	0.738059285	0.938	0.638	3.79E-99	Decidual Stroma 3 (M)	FERMT2
OBSL1	4.03E-103	0.478865449	0.661	0.212	9.69E-99	Decidual Stroma 3 (M)	OBSL1
FNDC3A1	4.56E-103	0.566902021	0.824	0.356	1.09E-98	Decidual Stroma 3 (M)	FNDC3A
WLS	1.00E-102	0.64270042	0.741	0.263	2.40E-98	Decidual Stroma 3 (M)	WLS
ERMP1	2.15E-102	0.329299165	0.415	0.079	5.17E-98	Decidual Stroma 3 (M)	ERMP1
GPBAR1	2.25E-102	0.405746194	0.449	0.093	5.40E-98	Decidual Stroma 3 (M)	GPBAR1
TCTA	6.31E-102	0.333766236	0.46	0.098	1.52E-97	Decidual Stroma 3 (M)	TCTA
PILRA1	8.49E-102	0.655374999	0.61	0.184	2.04E-97	Decidual Stroma 3 (M)	PILRA
NID2	1.27E-101	0.541251855	0.72	0.253	3.05E-97	Decidual Stroma 3 (M)	NID2
ELOB	1.93E-101	0.567460071	0.983	0.825	4.65E-97	Decidual Stroma 3 (M)	ELOB
CCDC1701	3.81E-101	0.31934734	0.436	0.086	9.15E-97	Decidual Stroma 3 (M)	CCDC170
TCEAL32	1.08E-100	0.6537166	0.92	0.484	2.60E-96	Decidual Stroma 3 (M)	TCEAL3
CRISPLD21	3.73E-100	0.619938294	0.979	0.666	8.96E-96	Decidual Stroma 3 (M)	CRISPLD2
PDZD2	8.03E-100	0.258066371	0.343	0.052	1.93E-95	Decidual Stroma 3 (M)	PDZD2
RAMP12	1.23E-99	0.688939779	0.975	0.421	2.96E-95	Decidual Stroma 3 (M)	RAMP1
SEMA7A	7.70E-99	0.285110382	0.267	0.029	1.85E-94	Decidual Stroma 3 (M)	SEMA7A
UBASH3B	3.19E-98	0.256072468	0.326	0.047	7.68E-94	Decidual Stroma 3 (M)	UBASH3B
TMX3	1.91E-97	0.463331155	0.665	0.222	4.58E-93	Decidual Stroma 3 (M)	TMX3
PODNL1	3.08E-97	0.540739504	0.686	0.246	7.40E-93	Decidual Stroma 3 (M)	PODNL1
MT-CO2	3.13E-97	0.454689014	0.991	0.995	7.52E-93	Decidual Stroma 3 (M)	MT-CO2
SGK1	4.45E-97	0.605261222	0.585	0.177	1.07E-92	Decidual Stroma 3 (M)	SGK1
LINC02432	1.82E-96	0.421410097	0.333	0.053	4.37E-92	Decidual Stroma 3 (M)	LINC02432
PODXL	3.09E-96	0.341269376	0.415	0.081	7.44E-92	Decidual Stroma 3 (M)	PODXL
GPRIN3	3.12E-96	0.361653568	0.256	0.027	7.50E-92	Decidual Stroma 3 (M)	GPRIN3
MCFD2	3.84E-96	0.610961867	0.873	0.491	9.23E-92	Decidual Stroma 3 (M)	MCFD2
SIL1	5.27E-96	0.643503821	0.909	0.5	1.27E-91	Decidual Stroma 3 (M)	SIL1
S100A3	5.67E-96	0.362071076	0.462	0.105	1.36E-91	Decidual Stroma 3 (M)	S100A3
RBBP61	9.77E-96	0.774325403	0.867	0.46	2.35E-91	Decidual Stroma 3 (M)	RBBP6
DMKN	1.86E-95	0.297961229	0.394	0.075	4.47E-91	Decidual Stroma 3 (M)	DMKN
ATOH8	3.38E-95	0.330741167	0.383	0.071	8.13E-91	Decidual Stroma 3 (M)	ATOH8
COLEC11	3.62E-95	0.383746219	0.485	0.122	8.70E-91	Decidual Stroma 3 (M)	COLEC11
SUMF2	3.97E-95	0.52497285	0.777	0.323	9.54E-91	Decidual Stroma 3 (M)	SUMF2
PIP5K1C	2.24E-94	0.455552301	0.67	0.232	5.39E-90	Decidual Stroma 3 (M)	PIP5K1C
PPDPF	2.27E-94	0.644505041	0.966	0.755	5.45E-90	Decidual Stroma 3 (M)	PPDPF
IFI6	5.83E-94	0.616822175	0.996	0.893	1.40E-89	Decidual Stroma 3 (M)	IFI6
UBE2D1	7.21E-94	0.410413779	0.631	0.199	1.73E-89	Decidual Stroma 3 (M)	UBE2D1
MT-ND2	1.47E-93	0.441496993	0.991	0.985	3.54E-89	Decidual Stroma 3 (M)	MT-ND2
GRAMD2B2	2.70E-93	0.450067927	0.663	0.213	6.49E-89	Decidual Stroma 3 (M)	GRAMD2B
SPON21	1.04E-92	0.652896166	0.949	0.637	2.51E-88	Decidual Stroma 3 (M)	SPON2
PAMR11	2.03E-92	0.582706341	0.85	0.412	4.89E-88	Decidual Stroma 3 (M)	PAMR1
FAM69A	2.17E-92	0.277988724	0.42	0.086	5.20E-88	Decidual Stroma 3 (M)	FAM69A
CTSS	3.00E-92	0.381427167	0.678	0.221	7.22E-88	Decidual Stroma 3 (M)	CTSS
PGRMC2	6.28E-92	0.663724441	0.816	0.413	1.51E-87	Decidual Stroma 3 (M)	PGRMC2
TXN1	1.09E-91	0.651449007	0.958	0.791	2.62E-87	Decidual Stroma 3 (M)	TXN
AVPI11	1.46E-91	0.35474522	0.508	0.131	3.50E-87	Decidual Stroma 3 (M)	AVPI1
ITPK1	2.75E-91	0.282913514	0.426	0.091	6.60E-87	Decidual Stroma 3 (M)	ITPK1
PDLIM2	3.07E-91	0.598877199	0.956	0.639	7.38E-87	Decidual Stroma 3 (M)	PDLIM2
MT-ND3	7.28E-91	0.406191059	0.989	0.994	1.75E-86	Decidual Stroma 3 (M)	MT-ND3
ZNF503	1.29E-90	0.521639021	0.68	0.249	3.10E-86	Decidual Stroma 3 (M)	ZNF503
SLC7A21	1.52E-90	0.310253617	0.39	0.077	3.64E-86	Decidual Stroma 3 (M)	SLC7A2
RANGAP1	4.70E-90	0.353177254	0.527	0.14	1.13E-85	Decidual Stroma 3 (M)	RANGAP1
GPRC5B	7.80E-90	0.451544126	0.741	0.274	1.88E-85	Decidual Stroma 3 (M)	GPRC5B
POLR2L	5.22E-89	0.571074522	0.968	0.746	1.25E-84	Decidual Stroma 3 (M)	POLR2L
COL4A4	1.06E-88	0.305217831	0.284	0.039	2.55E-84	Decidual Stroma 3 (M)	COL4A4
CLEC3B	3.23E-87	0.384445167	0.479	0.12	7.76E-83	Decidual Stroma 3 (M)	CLEC3B
COX16	6.03E-87	0.441045139	0.424	0.101	1.45E-82	Decidual Stroma 3 (M)	COX16
PPFIA11	8.07E-86	0.470411582	0.716	0.295	1.94E-81	Decidual Stroma 3 (M)	PPFIA1
SULF22	1.06E-85	0.538801737	0.902	0.468	2.55E-81	Decidual Stroma 3 (M)	SULF2
SLCO3A1	2.71E-85	0.283152139	0.443	0.102	6.51E-81	Decidual Stroma 3 (M)	SLCO3A1
RCBTB1	2.76E-85	0.293205792	0.417	0.093	6.62E-81	Decidual Stroma 3 (M)	RCBTB1
UCHL11	2.92E-85	0.552917524	0.468	0.123	7.03E-81	Decidual Stroma 3 (M)	UCHL1
CTSK2	4.85E-85	0.638134332	0.761	0.318	1.16E-80	Decidual Stroma 3 (M)	CTSK
DDX241	6.98E-85	0.524108726	0.941	0.652	1.68E-80	Decidual Stroma 3 (M)	DDX24
CLU	1.92E-84	0.662000477	0.941	0.574	4.61E-80	Decidual Stroma 3 (M)	CLU
SLC39A61	3.43E-84	0.647438294	0.822	0.416	8.23E-80	Decidual Stroma 3 (M)	SLC39A6
COX6C2	5.29E-84	0.542341281	0.973	0.805	1.27E-79	Decidual Stroma 3 (M)	COX6C
KLHL13	5.94E-84	0.273346021	0.369	0.074	1.43E-79	Decidual Stroma 3 (M)	KLHL13
ARL4D1	4.40E-83	0.54285218	0.634	0.231	1.06E-78	Decidual Stroma 3 (M)	ARL4D
LTBP2	1.10E-82	0.397429883	0.6	0.199	2.64E-78	Decidual Stroma 3 (M)	LTBP2
NAV31	1.40E-82	0.318504906	0.424	0.101	3.37E-78	Decidual Stroma 3 (M)	NAV3
FICD	1.54E-82	0.317228795	0.405	0.092	3.70E-78	Decidual Stroma 3 (M)	FICD
SMOC2	3.48E-82	0.46109384	0.528	0.158	8.37E-78	Decidual Stroma 3 (M)	SMOC2
RHOQ1	4.59E-82	0.476261454	0.814	0.372	1.10E-77	Decidual Stroma 3 (M)	RHOQ
GABARAPL11	5.36E-82	0.544854316	0.848	0.42	1.29E-77	Decidual Stroma 3 (M)	GABARAPL1
APBB1IP1	1.14E-81	0.293842414	0.456	0.116	2.74E-77	Decidual Stroma 3 (M)	APBB1IP
MFAP4	7.09E-81	0.553465674	0.949	0.513	1.71E-76	Decidual Stroma 3 (M)	MFAP4
AMFR	1.25E-80	0.329843608	0.534	0.159	2.99E-76	Decidual Stroma 3 (M)	AMFR
TMEM372	1.53E-80	0.416540865	0.769	0.289	3.67E-76	Decidual Stroma 3 (M)	TMEM37
PON2	2.17E-80	0.36515921	0.669	0.241	5.21E-76	Decidual Stroma 3 (M)	PON2
LRRN4CL1	3.84E-80	0.384064859	0.578	0.191	9.22E-76	Decidual Stroma 3 (M)	LRRN4CL
RAB18	4.34E-80	0.488334456	0.801	0.368	1.04E-75	Decidual Stroma 3 (M)	RAB18
KDR1	4.61E-80	0.549045257	0.508	0.146	1.11E-75	Decidual Stroma 3 (M)	KDR
LGALS91	7.60E-80	0.376331299	0.686	0.251	1.83E-75	Decidual Stroma 3 (M)	LGALS9
EEA11	9.18E-80	0.719386109	0.858	0.495	2.21E-75	Decidual Stroma 3 (M)	EEA1
CLTB1	1.23E-79	0.555185955	0.902	0.571	2.95E-75	Decidual Stroma 3 (M)	CLTB
PLA2R1	7.56E-79	0.357384051	0.564	0.183	1.82E-74	Decidual Stroma 3 (M)	PLA2R1
TAF101	1.42E-78	0.454868053	0.792	0.36	3.42E-74	Decidual Stroma 3 (M)	TAF10
UQCRQ	3.66E-78	0.52951089	0.939	0.672	8.79E-74	Decidual Stroma 3 (M)	UQCRQ
ACAP1	4.11E-78	0.262674155	0.36	0.076	9.88E-74	Decidual Stroma 3 (M)	ACAP1
TCF7L22	4.67E-78	0.528266331	0.89	0.506	1.12E-73	Decidual Stroma 3 (M)	TCF7L2
HMGN3	5.35E-78	0.549536512	0.843	0.42	1.29E-73	Decidual Stroma 3 (M)	HMGN3
TMA71	6.18E-78	0.519578286	0.96	0.722	1.49E-73	Decidual Stroma 3 (M)	TMA7
COL4A5	1.01E-77	0.377609538	0.492	0.147	2.44E-73	Decidual Stroma 3 (M)	COL4A5
SLC37A31	3.03E-77	0.36301152	0.61	0.209	7.28E-73	Decidual Stroma 3 (M)	SLC37A3
MOSPD2	3.51E-77	0.432430115	0.475	0.139	8.43E-73	Decidual Stroma 3 (M)	MOSPD2
PLAT2	4.78E-77	0.502320883	0.648	0.243	1.15E-72	Decidual Stroma 3 (M)	PLAT
LY6K	1.14E-76	0.299597	0.434	0.112	2.73E-72	Decidual Stroma 3 (M)	LY6K
FOSL21	3.23E-76	0.5179481	0.883	0.505	7.76E-72	Decidual Stroma 3 (M)	FOSL2
CHRD	3.88E-76	0.253664159	0.379	0.085	9.32E-72	Decidual Stroma 3 (M)	CHRD
PHYHIP	7.02E-76	0.309219822	0.42	0.106	1.69E-71	Decidual Stroma 3 (M)	PHYHIP
ARC	8.71E-76	0.629718056	0.428	0.118	2.09E-71	Decidual Stroma 3 (M)	ARC
TP53TG1	9.43E-76	0.257681008	0.449	0.12	2.27E-71	Decidual Stroma 3 (M)	TP53TG1
PDE4B	1.09E-75	0.284910331	0.464	0.123	2.63E-71	Decidual Stroma 3 (M)	PDE4B
ABCC3	1.39E-75	0.260676871	0.377	0.086	3.35E-71	Decidual Stroma 3 (M)	ABCC3
ADAMTSL4	2.76E-75	0.368502622	0.61	0.217	6.63E-71	Decidual Stroma 3 (M)	ADAMTSL4
SYNGR1	3.42E-75	0.360866512	0.551	0.181	8.22E-71	Decidual Stroma 3 (M)	SYNGR1
MAFB	7.01E-75	0.696021874	0.43	0.123	1.68E-70	Decidual Stroma 3 (M)	MAFB
OST4	1.18E-74	0.476772732	0.962	0.813	2.83E-70	Decidual Stroma 3 (M)	OST4
ALDH1A12	1.55E-74	0.505122453	0.767	0.314	3.72E-70	Decidual Stroma 3 (M)	ALDH1A1
DNAJB91	1.82E-74	0.441778038	0.712	0.298	4.38E-70	Decidual Stroma 3 (M)	DNAJB9
CATSPERZ	2.79E-74	0.250501777	0.356	0.077	6.71E-70	Decidual Stroma 3 (M)	CATSPERZ
SMIM30	6.30E-74	0.320627027	0.481	0.142	1.51E-69	Decidual Stroma 3 (M)	SMIM30
DPYSL2	1.24E-73	0.667462691	0.956	0.703	2.99E-69	Decidual Stroma 3 (M)	DPYSL2
HSPB1	1.79E-73	0.543669706	0.998	0.91	4.31E-69	Decidual Stroma 3 (M)	HSPB1
CBX3	2.91E-73	0.701128445	0.941	0.625	7.01E-69	Decidual Stroma 3 (M)	CBX3
STON1	4.64E-73	0.404368804	0.733	0.307	1.11E-68	Decidual Stroma 3 (M)	STON1
RAB5IF	4.85E-73	0.353377418	0.578	0.206	1.17E-68	Decidual Stroma 3 (M)	RAB5IF
BASP12	7.40E-73	0.505766334	0.998	0.781	1.78E-68	Decidual Stroma 3 (M)	BASP1
ADM	1.27E-72	0.575860884	0.761	0.376	3.06E-68	Decidual Stroma 3 (M)	ADM
MMP24OS	2.57E-72	0.377413008	0.678	0.271	6.19E-68	Decidual Stroma 3 (M)	MMP24OS
SYTL42	6.81E-72	0.383323638	0.659	0.247	1.64E-67	Decidual Stroma 3 (M)	SYTL4
LINC013581	1.17E-71	0.272480495	0.386	0.092	2.80E-67	Decidual Stroma 3 (M)	LINC01358
SNHG25	1.20E-71	0.387362092	0.438	0.122	2.88E-67	Decidual Stroma 3 (M)	SNHG25
DAXX	1.27E-71	0.416464396	0.699	0.297	3.05E-67	Decidual Stroma 3 (M)	DAXX
MT-ND1	5.22E-71	0.337936674	0.991	0.991	1.26E-66	Decidual Stroma 3 (M)	MT-ND1
CHSY11	1.54E-70	0.451760189	0.706	0.304	3.71E-66	Decidual Stroma 3 (M)	CHSY1
P3H2	2.03E-70	0.327109107	0.502	0.159	4.89E-66	Decidual Stroma 3 (M)	P3H2
SSR41	2.25E-70	0.452435526	0.964	0.796	5.40E-66	Decidual Stroma 3 (M)	SSR4
CHPT1	2.54E-70	0.328971386	0.593	0.21	6.10E-66	Decidual Stroma 3 (M)	CHPT1
OSTF1	3.12E-70	0.316112649	0.636	0.238	7.50E-66	Decidual Stroma 3 (M)	OSTF1
MESD	3.28E-70	0.487418178	0.854	0.509	7.88E-66	Decidual Stroma 3 (M)	MESD
TMEM256	4.39E-70	0.402351294	0.661	0.275	1.06E-65	Decidual Stroma 3 (M)	TMEM256
NLGN4X	6.63E-70	0.312970055	0.451	0.131	1.59E-65	Decidual Stroma 3 (M)	NLGN4X
SKP1	1.26E-69	0.401493052	0.975	0.847	3.03E-65	Decidual Stroma 3 (M)	SKP1
TMEM14A	1.44E-69	0.294919878	0.515	0.163	3.46E-65	Decidual Stroma 3 (M)	TMEM14A
GLUL1	2.54E-69	0.614281855	0.919	0.618	6.11E-65	Decidual Stroma 3 (M)	GLUL
RHOB2	7.69E-69	0.485379433	0.956	0.678	1.85E-64	Decidual Stroma 3 (M)	RHOB
RNASEH2C	2.12E-68	0.410620961	0.775	0.362	5.10E-64	Decidual Stroma 3 (M)	RNASEH2C
VPS13D	2.44E-68	0.281282107	0.511	0.164	5.87E-64	Decidual Stroma 3 (M)	VPS13D
EXT2	2.44E-68	0.36929194	0.616	0.241	5.87E-64	Decidual Stroma 3 (M)	EXT2
ASAH1	3.21E-68	0.315266159	0.697	0.292	7.71E-64	Decidual Stroma 3 (M)	ASAH1
SELENOM	5.53E-68	0.468776803	0.968	0.804	1.33E-63	Decidual Stroma 3 (M)	SELENOM
ISCU	2.78E-67	0.458660766	0.86	0.512	6.69E-63	Decidual Stroma 3 (M)	ISCU
FBLN5	9.71E-67	0.424680812	0.814	0.404	2.33E-62	Decidual Stroma 3 (M)	FBLN5
C11orf962	1.43E-66	0.43953293	0.991	0.6	3.44E-62	Decidual Stroma 3 (M)	C11orf96
MZT2B	1.57E-66	0.506074185	0.956	0.748	3.77E-62	Decidual Stroma 3 (M)	MZT2B
UBXN2A	1.90E-66	0.300709715	0.583	0.209	4.56E-62	Decidual Stroma 3 (M)	UBXN2A
TSKU1	7.38E-66	0.428689253	0.746	0.363	1.77E-61	Decidual Stroma 3 (M)	TSKU
CHEK21	7.45E-66	0.253202207	0.464	0.137	1.79E-61	Decidual Stroma 3 (M)	CHEK2
CUTA	2.20E-65	0.479681074	0.888	0.573	5.30E-61	Decidual Stroma 3 (M)	CUTA
TMED10	2.84E-65	0.468800907	0.911	0.654	6.82E-61	Decidual Stroma 3 (M)	TMED10
ECM1	2.96E-65	0.433304315	0.602	0.237	7.11E-61	Decidual Stroma 3 (M)	ECM1
CCDC151	3.57E-65	0.271123205	0.381	0.102	8.58E-61	Decidual Stroma 3 (M)	CCDC151
FADS3	3.96E-65	0.421481132	0.678	0.306	9.53E-61	Decidual Stroma 3 (M)	FADS3
ERGIC1	4.81E-65	0.433267135	0.782	0.398	1.16E-60	Decidual Stroma 3 (M)	ERGIC1
CDH11	6.86E-65	0.473206736	0.941	0.6	1.65E-60	Decidual Stroma 3 (M)	CDH11
B2M	1.36E-64	0.347036535	1	0.996	3.26E-60	Decidual Stroma 3 (M)	B2M
ERLEC1	1.51E-64	0.480162087	0.881	0.541	3.63E-60	Decidual Stroma 3 (M)	ERLEC1
FOXO12	1.95E-64	0.349564993	0.884	0.383	4.69E-60	Decidual Stroma 3 (M)	FOXO1
SNHG9	1.97E-64	0.421770736	0.528	0.183	4.73E-60	Decidual Stroma 3 (M)	SNHG9
INSR2	2.55E-64	0.424864691	0.748	0.355	6.12E-60	Decidual Stroma 3 (M)	INSR
DDA1	3.10E-64	0.35226162	0.625	0.251	7.46E-60	Decidual Stroma 3 (M)	DDA1
UXS1	3.68E-64	0.359050152	0.561	0.209	8.85E-60	Decidual Stroma 3 (M)	UXS1
SH3BGRL31	3.94E-64	0.491322388	0.983	0.793	9.47E-60	Decidual Stroma 3 (M)	SH3BGRL3
RDH101	4.41E-64	0.392060317	0.657	0.279	1.06E-59	Decidual Stroma 3 (M)	RDH10
C1QTNF1	5.03E-64	0.432809741	0.665	0.298	1.21E-59	Decidual Stroma 3 (M)	C1QTNF1
FXYD1	5.93E-64	0.463941036	0.837	0.455	1.43E-59	Decidual Stroma 3 (M)	FXYD1
TMCO11	1.26E-63	0.477729893	0.92	0.61	3.03E-59	Decidual Stroma 3 (M)	TMCO1
RHEB1	1.71E-63	0.473972658	0.896	0.583	4.11E-59	Decidual Stroma 3 (M)	RHEB
MTR1	2.18E-63	0.378307551	0.739	0.34	5.25E-59	Decidual Stroma 3 (M)	MTR
OSR22	7.99E-63	0.280239933	0.739	0.296	1.92E-58	Decidual Stroma 3 (M)	OSR2
TFPI	1.04E-62	0.292640884	0.985	0.72	2.51E-58	Decidual Stroma 3 (M)	TFPI
PISD	1.26E-62	0.253901193	0.428	0.126	3.03E-58	Decidual Stroma 3 (M)	PISD
GGT5	1.35E-62	0.369865695	0.517	0.186	3.25E-58	Decidual Stroma 3 (M)	GGT5
IFI27L22	1.62E-62	0.400266169	0.822	0.415	3.89E-58	Decidual Stroma 3 (M)	IFI27L2
NAA38	2.65E-62	0.428802164	0.805	0.434	6.37E-58	Decidual Stroma 3 (M)	NAA38
MYL91	6.68E-62	0.3909088	0.987	0.785	1.60E-57	Decidual Stroma 3 (M)	MYL9
ASCC3	7.80E-62	0.415547258	0.752	0.377	1.87E-57	Decidual Stroma 3 (M)	ASCC3
IGFBP62	1.87E-61	0.652675305	0.875	0.511	4.49E-57	Decidual Stroma 3 (M)	IGFBP6
LEPROTL1	2.18E-61	0.303109529	0.614	0.245	5.23E-57	Decidual Stroma 3 (M)	LEPROTL1
APBB2	2.19E-61	0.300556292	0.538	0.193	5.25E-57	Decidual Stroma 3 (M)	APBB2
NDUFAF8	5.56E-61	0.343931191	0.65	0.277	1.34E-56	Decidual Stroma 3 (M)	NDUFAF8
PSMD10	8.26E-61	0.284189718	0.483	0.16	1.98E-56	Decidual Stroma 3 (M)	PSMD10
NLGN2	1.02E-60	0.279136	0.443	0.137	2.46E-56	Decidual Stroma 3 (M)	NLGN2
ANTXR12	1.04E-60	0.351415135	0.828	0.435	2.50E-56	Decidual Stroma 3 (M)	ANTXR1
SMIM4	1.07E-60	0.276373774	0.515	0.178	2.57E-56	Decidual Stroma 3 (M)	SMIM4
C19orf53	2.28E-60	0.426548212	0.905	0.6	5.47E-56	Decidual Stroma 3 (M)	C19orf53
DEPTOR	6.53E-60	0.261308495	0.587	0.215	1.57E-55	Decidual Stroma 3 (M)	DEPTOR
KANK22	8.66E-60	0.400686826	0.892	0.527	2.08E-55	Decidual Stroma 3 (M)	KANK2
ABCA11	1.35E-59	0.314306353	0.646	0.256	3.25E-55	Decidual Stroma 3 (M)	ABCA1
TMEM219	1.51E-59	0.402089991	0.799	0.438	3.63E-55	Decidual Stroma 3 (M)	TMEM219
FBXO7	2.36E-59	0.369488606	0.703	0.324	5.66E-55	Decidual Stroma 3 (M)	FBXO7
SLC25A4	2.50E-59	0.263233785	0.316	0.076	6.01E-55	Decidual Stroma 3 (M)	SLC25A4
ZNF226	2.79E-59	0.259144285	0.396	0.115	6.70E-55	Decidual Stroma 3 (M)	ZNF226
SLC39A10	2.90E-59	0.302428109	0.576	0.22	6.97E-55	Decidual Stroma 3 (M)	SLC39A10
LNPK	1.23E-58	0.279578704	0.509	0.182	2.95E-54	Decidual Stroma 3 (M)	LNPK
MIEN1	4.57E-58	0.345389619	0.608	0.253	1.10E-53	Decidual Stroma 3 (M)	MIEN1
BIRC2	1.04E-57	0.398220383	0.691	0.31	2.49E-53	Decidual Stroma 3 (M)	BIRC2
MAP1A	2.33E-57	0.281324032	0.521	0.19	5.59E-53	Decidual Stroma 3 (M)	MAP1A
ATP5F1E	5.32E-57	0.283123816	0.996	0.925	1.28E-52	Decidual Stroma 3 (M)	ATP5F1E
NDUFB1	6.25E-57	0.421533004	0.894	0.537	1.50E-52	Decidual Stroma 3 (M)	NDUFB1
TBL1X	7.77E-57	0.353232407	0.644	0.276	1.87E-52	Decidual Stroma 3 (M)	TBL1X
TPST11	7.83E-57	0.375501409	0.801	0.419	1.88E-52	Decidual Stroma 3 (M)	TPST1
FAM207A	1.24E-56	0.387300784	0.542	0.218	2.97E-52	Decidual Stroma 3 (M)	FAM207A
C19orf24	1.84E-56	0.309156568	0.612	0.251	4.43E-52	Decidual Stroma 3 (M)	C19orf24
TLE2	2.26E-56	0.266032816	0.411	0.126	5.44E-52	Decidual Stroma 3 (M)	TLE2
LPAR11	2.50E-55	0.266553714	0.581	0.223	6.01E-51	Decidual Stroma 3 (M)	LPAR1
UBL5	2.81E-55	0.406703361	0.958	0.759	6.74E-51	Decidual Stroma 3 (M)	UBL5
CERS61	3.40E-55	0.288550449	0.549	0.207	8.17E-51	Decidual Stroma 3 (M)	CERS6
ITGB51	4.09E-55	0.385018182	0.784	0.403	9.84E-51	Decidual Stroma 3 (M)	ITGB5
S100A132	4.16E-55	0.432199845	0.92	0.641	1.00E-50	Decidual Stroma 3 (M)	S100A13
PEMT1	4.56E-55	0.341224083	0.54	0.215	1.10E-50	Decidual Stroma 3 (M)	PEMT
NMT1	8.09E-55	0.541080784	0.905	0.564	1.94E-50	Decidual Stroma 3 (M)	NMT1
ENPP1	1.18E-54	0.298843687	0.856	0.449	2.84E-50	Decidual Stroma 3 (M)	ENPP1
CHCHD10	1.25E-54	0.268035854	0.585	0.234	3.00E-50	Decidual Stroma 3 (M)	CHCHD10
SNX21	2.05E-54	0.27835861	0.589	0.242	4.93E-50	Decidual Stroma 3 (M)	SNX21
NENF	2.20E-54	0.44193443	0.831	0.503	5.29E-50	Decidual Stroma 3 (M)	NENF
LDLR	9.83E-54	0.427216175	0.682	0.325	2.36E-49	Decidual Stroma 3 (M)	LDLR
TUT71	1.16E-53	0.260450758	0.549	0.211	2.79E-49	Decidual Stroma 3 (M)	TUT7
NDUFB2	1.33E-53	0.410981122	0.905	0.661	3.21E-49	Decidual Stroma 3 (M)	NDUFB2
HINT1	1.34E-53	0.397936633	0.96	0.737	3.22E-49	Decidual Stroma 3 (M)	HINT1
SERF2	1.65E-53	0.317867183	0.996	0.954	3.97E-49	Decidual Stroma 3 (M)	SERF2
MFSD12	1.66E-53	0.30636786	0.545	0.219	3.98E-49	Decidual Stroma 3 (M)	MFSD12
RRAS	2.84E-53	0.430796339	0.877	0.628	6.82E-49	Decidual Stroma 3 (M)	RRAS
LRRC8A1	3.40E-53	0.318075239	0.669	0.304	8.18E-49	Decidual Stroma 3 (M)	LRRC8A
MT-ND4	4.21E-53	0.274897181	0.991	0.996	1.01E-48	Decidual Stroma 3 (M)	MT-ND4
GREB12	4.50E-53	0.263470074	0.536	0.197	1.08E-48	Decidual Stroma 3 (M)	GREB1
DNAJC31	6.08E-53	0.363806614	0.824	0.471	1.46E-48	Decidual Stroma 3 (M)	DNAJC3
MSRB2	6.09E-53	0.36285911	0.723	0.37	1.46E-48	Decidual Stroma 3 (M)	MSRB2
SUCO	1.09E-52	0.323772406	0.534	0.213	2.63E-48	Decidual Stroma 3 (M)	SUCO
AXL	9.91E-52	0.373883613	0.83	0.484	2.38E-47	Decidual Stroma 3 (M)	AXL
ZFAND5	1.00E-51	0.386049403	0.828	0.492	2.41E-47	Decidual Stroma 3 (M)	ZFAND5
SBDS	2.14E-51	0.392260228	0.894	0.628	5.13E-47	Decidual Stroma 3 (M)	SBDS
HSBP1L1	3.63E-51	0.281707857	0.453	0.16	8.72E-47	Decidual Stroma 3 (M)	HSBP1L1
CEBPB2	3.93E-51	0.414604668	0.924	0.63	9.45E-47	Decidual Stroma 3 (M)	CEBPB
UQCR11	7.34E-51	0.387087051	0.917	0.64	1.76E-46	Decidual Stroma 3 (M)	UQCR11
VASN	1.99E-50	0.369856207	0.761	0.432	4.77E-46	Decidual Stroma 3 (M)	VASN
CFH1	2.93E-50	0.371051595	0.542	0.222	7.04E-46	Decidual Stroma 3 (M)	CFH
SEL1L	1.08E-49	0.310891724	0.727	0.371	2.59E-45	Decidual Stroma 3 (M)	SEL1L
PSMD14	1.09E-49	0.36759409	0.777	0.399	2.61E-45	Decidual Stroma 3 (M)	PSMD14
RAB311	1.19E-49	0.419821519	0.873	0.559	2.87E-45	Decidual Stroma 3 (M)	RAB31
SERP11	1.25E-49	0.40860333	0.903	0.648	3.00E-45	Decidual Stroma 3 (M)	SERP1
LIMA12	1.62E-49	0.359518654	0.93	0.604	3.88E-45	Decidual Stroma 3 (M)	LIMA1
SLC6A8	1.83E-49	0.280544895	0.627	0.266	4.39E-45	Decidual Stroma 3 (M)	SLC6A8
CRIP1	3.14E-49	0.443237761	0.523	0.233	7.54E-45	Decidual Stroma 3 (M)	CRIP1
CCDC85B	4.57E-49	0.394960729	0.884	0.576	1.10E-44	Decidual Stroma 3 (M)	CCDC85B
MRPS18A	8.04E-49	0.262702181	0.477	0.182	1.93E-44	Decidual Stroma 3 (M)	MRPS18A
BMP1	1.15E-48	0.352788434	0.759	0.411	2.76E-44	Decidual Stroma 3 (M)	BMP1
CEP1262	1.25E-48	0.250177189	0.564	0.228	2.99E-44	Decidual Stroma 3 (M)	CEP126
MCUR1	1.91E-48	0.267193588	0.606	0.267	4.59E-44	Decidual Stroma 3 (M)	MCUR1
SEPT111	2.16E-48	0.360485415	0.92	0.646	5.19E-44	Decidual Stroma 3 (M)	11-Sep
LMO4	3.14E-48	0.43922727	0.924	0.623	7.54E-44	Decidual Stroma 3 (M)	LMO4
PAPPA2	4.37E-48	0.406830145	0.826	0.48	1.05E-43	Decidual Stroma 3 (M)	PAPPA
NECTIN2	1.03E-47	0.376745349	0.775	0.467	2.49E-43	Decidual Stroma 3 (M)	NECTIN2
PREPL	1.23E-47	0.313608765	0.553	0.235	2.96E-43	Decidual Stroma 3 (M)	PREPL
PTPN131	1.44E-47	0.25072817	0.527	0.208	3.45E-43	Decidual Stroma 3 (M)	PTPN13
NFE2L21	1.70E-47	0.360069088	0.905	0.587	4.08E-43	Decidual Stroma 3 (M)	NFE2L2
S100A4	2.34E-47	0.431560545	0.987	0.769	5.61E-43	Decidual Stroma 3 (M)	S100A4
PROCR	4.55E-47	0.309671688	0.473	0.185	1.09E-42	Decidual Stroma 3 (M)	PROCR
PLCG2	4.76E-47	0.319726128	0.835	0.447	1.15E-42	Decidual Stroma 3 (M)	PLCG2
MRPL20	1.39E-46	0.347779574	0.867	0.548	3.34E-42	Decidual Stroma 3 (M)	MRPL20
PPP1R7	2.23E-46	0.30640791	0.674	0.338	5.36E-42	Decidual Stroma 3 (M)	PPP1R7
ATP5MG	2.26E-46	0.357718107	0.932	0.709	5.43E-42	Decidual Stroma 3 (M)	ATP5MG
PBXIP12	5.02E-46	0.275573584	0.678	0.331	1.21E-41	Decidual Stroma 3 (M)	PBXIP1
TCAF1	6.02E-46	0.405267318	0.786	0.451	1.45E-41	Decidual Stroma 3 (M)	TCAF1
CD24	7.42E-46	0.433246468	0.301	0.087	1.78E-41	Decidual Stroma 3 (M)	CD24
MBOAT7	7.96E-46	0.250286636	0.445	0.164	1.91E-41	Decidual Stroma 3 (M)	MBOAT7
ARL3	3.49E-45	0.327163974	0.716	0.387	8.39E-41	Decidual Stroma 3 (M)	ARL3
AKAP132	4.08E-45	0.328713099	0.917	0.615	9.80E-41	Decidual Stroma 3 (M)	AKAP13
SPSB1	4.42E-45	0.295782013	0.6	0.277	1.06E-40	Decidual Stroma 3 (M)	SPSB1
CCPG1	1.21E-44	0.283080138	0.741	0.388	2.91E-40	Decidual Stroma 3 (M)	CCPG1
PPA1	1.91E-44	0.440222462	0.902	0.637	4.60E-40	Decidual Stroma 3 (M)	PPA1
MT-CYB	5.36E-44	0.263198499	0.991	0.992	1.29E-39	Decidual Stroma 3 (M)	MT-CYB
WASHC3	5.76E-44	0.255785032	0.604	0.282	1.38E-39	Decidual Stroma 3 (M)	WASHC3
AHCY	5.94E-44	0.311099992	0.553	0.251	1.43E-39	Decidual Stroma 3 (M)	AHCY
LYRM2	7.38E-44	0.262961575	0.57	0.252	1.77E-39	Decidual Stroma 3 (M)	LYRM2
UGDH	1.78E-43	0.363461753	0.727	0.418	4.27E-39	Decidual Stroma 3 (M)	UGDH
MYDGF	1.79E-43	0.40639101	0.938	0.735	4.30E-39	Decidual Stroma 3 (M)	MYDGF
NDUFA3	3.42E-43	0.322574386	0.841	0.519	8.22E-39	Decidual Stroma 3 (M)	NDUFA3
MT-ATP8	4.16E-43	0.341632535	0.811	0.46	9.99E-39	Decidual Stroma 3 (M)	MT-ATP8
NUCB2	5.97E-43	0.354965283	0.919	0.644	1.44E-38	Decidual Stroma 3 (M)	NUCB2
COX14	6.34E-43	0.269678581	0.646	0.313	1.52E-38	Decidual Stroma 3 (M)	COX14
METAP22	2.62E-42	0.394467518	0.915	0.656	6.30E-38	Decidual Stroma 3 (M)	METAP2
H2AFJ	5.26E-42	0.333809678	0.835	0.559	1.26E-37	Decidual Stroma 3 (M)	H2AFJ
AHNAK2	5.54E-42	0.313116744	0.542	0.246	1.33E-37	Decidual Stroma 3 (M)	AHNAK2
MRPL41	1.03E-41	0.329355917	0.723	0.407	2.47E-37	Decidual Stroma 3 (M)	MRPL41
PRR13	1.14E-41	0.27260783	0.652	0.328	2.75E-37	Decidual Stroma 3 (M)	PRR13
DNAJC1	1.32E-41	0.330849149	0.822	0.502	3.18E-37	Decidual Stroma 3 (M)	DNAJC1
NID11	1.63E-41	0.357095257	0.778	0.462	3.92E-37	Decidual Stroma 3 (M)	NID1
DDT	1.86E-41	0.330651476	0.767	0.455	4.47E-37	Decidual Stroma 3 (M)	DDT
ZEB11	2.33E-41	0.315836821	0.866	0.533	5.60E-37	Decidual Stroma 3 (M)	ZEB1
CETN2	6.59E-41	0.285058188	0.739	0.4	1.58E-36	Decidual Stroma 3 (M)	CETN2
MRPL40	9.87E-41	0.272492578	0.625	0.314	2.37E-36	Decidual Stroma 3 (M)	MRPL40
FBN2	1.74E-40	0.499702072	0.312	0.107	4.18E-36	Decidual Stroma 3 (M)	FBN2
GNPTG	2.43E-40	0.281380654	0.585	0.277	5.85E-36	Decidual Stroma 3 (M)	GNPTG
MT-ND4L	2.75E-40	0.334744703	0.983	0.861	6.61E-36	Decidual Stroma 3 (M)	MT-ND4L
BZW1	3.17E-40	0.38283195	0.917	0.669	7.62E-36	Decidual Stroma 3 (M)	BZW1
PKIG	3.43E-40	0.317220923	0.818	0.494	8.24E-36	Decidual Stroma 3 (M)	PKIG
PNKD	4.02E-40	0.290954627	0.659	0.351	9.65E-36	Decidual Stroma 3 (M)	PNKD
LSM4	9.82E-40	0.27063645	0.633	0.313	2.36E-35	Decidual Stroma 3 (M)	LSM4
SPCS3	1.09E-39	0.322903096	0.805	0.508	2.61E-35	Decidual Stroma 3 (M)	SPCS3
MAP1LC3B	8.22E-39	0.325472457	0.83	0.543	1.98E-34	Decidual Stroma 3 (M)	MAP1LC3B
LAYN	3.33E-38	0.279514912	0.625	0.3	8.00E-34	Decidual Stroma 3 (M)	LAYN
REXO2	4.04E-38	0.317186365	0.93	0.72	9.72E-34	Decidual Stroma 3 (M)	REXO2
NDUFA41	4.57E-38	0.310318269	0.96	0.79	1.10E-33	Decidual Stroma 3 (M)	NDUFA4
COPS2	6.93E-38	0.25814188	0.714	0.378	1.67E-33	Decidual Stroma 3 (M)	COPS2
FILIP1L	7.35E-38	0.424878898	0.847	0.556	1.77E-33	Decidual Stroma 3 (M)	FILIP1L
APLP21	4.06E-37	0.3148986	0.888	0.67	9.75E-33	Decidual Stroma 3 (M)	APLP2
PAPSS2	4.55E-37	0.27859268	0.655	0.343	1.09E-32	Decidual Stroma 3 (M)	PAPSS2
COMT	1.07E-36	0.32763624	0.867	0.603	2.58E-32	Decidual Stroma 3 (M)	COMT
MEDAG2	1.48E-36	0.273408666	0.555	0.256	3.56E-32	Decidual Stroma 3 (M)	MEDAG
SEC62	1.95E-36	0.289407509	0.964	0.789	4.68E-32	Decidual Stroma 3 (M)	SEC62
TBCA	6.43E-36	0.386208012	0.955	0.753	1.55E-31	Decidual Stroma 3 (M)	TBCA
SOD1	1.03E-35	0.324965402	0.905	0.665	2.48E-31	Decidual Stroma 3 (M)	SOD1
ATP6V1E1	1.07E-35	0.251527434	0.763	0.43	2.57E-31	Decidual Stroma 3 (M)	ATP6V1E1
SH3D19	1.25E-35	0.251374525	0.667	0.354	3.00E-31	Decidual Stroma 3 (M)	SH3D19
EMC7	1.71E-35	0.32609558	0.731	0.477	4.12E-31	Decidual Stroma 3 (M)	EMC7
MMP141	2.11E-35	0.289221147	0.752	0.447	5.07E-31	Decidual Stroma 3 (M)	MMP14
FUCA2	2.62E-35	0.257749109	0.703	0.386	6.29E-31	Decidual Stroma 3 (M)	FUCA2
VAMP2	3.25E-35	0.292251124	0.718	0.415	7.80E-31	Decidual Stroma 3 (M)	VAMP2
C1QTNF62	3.91E-35	0.253438068	0.544	0.262	9.39E-31	Decidual Stroma 3 (M)	C1QTNF6
TCEAL42	7.86E-35	0.287614903	0.958	0.743	1.89E-30	Decidual Stroma 3 (M)	TCEAL4
ADAM9	1.21E-34	0.289650441	0.706	0.405	2.90E-30	Decidual Stroma 3 (M)	ADAM9
PTTG1IP	3.01E-34	0.287483411	0.913	0.673	7.22E-30	Decidual Stroma 3 (M)	PTTG1IP
EIF1AX1	3.19E-34	0.286014144	0.922	0.691	7.66E-30	Decidual Stroma 3 (M)	EIF1AX
VTI1B	8.07E-34	0.255369054	0.78	0.458	1.94E-29	Decidual Stroma 3 (M)	VTI1B
SDF4	1.25E-33	0.290692303	0.814	0.533	3.01E-29	Decidual Stroma 3 (M)	SDF4
STUB1	1.66E-33	0.261491295	0.786	0.487	3.99E-29	Decidual Stroma 3 (M)	STUB1
BLOC1S1	2.07E-33	0.262702623	0.748	0.449	4.97E-29	Decidual Stroma 3 (M)	BLOC1S1
FBLN12	2.38E-33	0.305903806	0.979	0.75	5.71E-29	Decidual Stroma 3 (M)	FBLN1
PTPRA	3.69E-33	0.25142646	0.833	0.523	8.88E-29	Decidual Stroma 3 (M)	PTPRA
POLR2A	6.38E-33	0.263906831	0.648	0.34	1.53E-28	Decidual Stroma 3 (M)	POLR2A
RASD1	8.08E-33	0.387520605	0.339	0.136	1.94E-28	Decidual Stroma 3 (M)	RASD1
AP2B1	1.14E-32	0.256485608	0.894	0.58	2.74E-28	Decidual Stroma 3 (M)	AP2B1
NEDD8	3.43E-32	0.280577085	0.911	0.686	8.25E-28	Decidual Stroma 3 (M)	NEDD8
POLE4	4.65E-32	0.263136831	0.591	0.313	1.12E-27	Decidual Stroma 3 (M)	POLE4
RHOU	4.88E-32	0.251870173	0.731	0.413	1.17E-27	Decidual Stroma 3 (M)	RHOU
FIS1	1.16E-30	0.26710657	0.831	0.574	2.78E-26	Decidual Stroma 3 (M)	FIS1
MAP1B	1.72E-30	0.275474726	0.886	0.601	4.15E-26	Decidual Stroma 3 (M)	MAP1B
CARHSP11	5.08E-30	0.262114314	0.801	0.53	1.22E-25	Decidual Stroma 3 (M)	CARHSP1
DYNLRB1	6.73E-30	0.270072685	0.864	0.623	1.62E-25	Decidual Stroma 3 (M)	DYNLRB1
SERINC3	7.51E-30	0.26527857	0.816	0.544	1.81E-25	Decidual Stroma 3 (M)	SERINC3
BCAP31	2.39E-29	0.258997776	0.701	0.428	5.75E-25	Decidual Stroma 3 (M)	BCAP31
DYNC1I2	4.13E-29	0.250651074	0.945	0.726	9.92E-25	Decidual Stroma 3 (M)	DYNC1I2
SNRPG	5.28E-29	0.275321861	0.841	0.584	1.27E-24	Decidual Stroma 3 (M)	SNRPG
SEC61B	1.20E-28	0.268394031	0.934	0.761	2.89E-24	Decidual Stroma 3 (M)	SEC61B
EIF2S2	1.25E-28	0.286657233	0.945	0.738	3.00E-24	Decidual Stroma 3 (M)	EIF2S2
TMEM59	1.74E-28	0.270887342	0.951	0.779	4.17E-24	Decidual Stroma 3 (M)	TMEM59
H2AFZ1	8.00E-28	0.317238756	0.879	0.639	1.92E-23	Decidual Stroma 3 (M)	H2AFZ
UQCR10	5.98E-27	0.262766511	0.873	0.647	1.44E-22	Decidual Stroma 3 (M)	UQCR10
GJA1	1.52E-25	0.250322234	0.939	0.682	3.65E-21	Decidual Stroma 3 (M)	GJA1
TMEM14C	3.09E-25	0.253441225	0.831	0.579	7.43E-21	Decidual Stroma 3 (M)	TMEM14C
ADAMTS1	6.09E-25	0.321848252	0.919	0.684	1.46E-20	Decidual Stroma 3 (M)	ADAMTS1
SSR3	6.31E-25	0.264297633	0.902	0.666	1.52E-20	Decidual Stroma 3 (M)	SSR3
RND31	2.52E-22	0.261894743	0.746	0.499	6.06E-18	Decidual Stroma 3 (M)	RND3
PRDX5	2.39E-21	0.265696729	0.928	0.751	5.75E-17	Decidual Stroma 3 (M)	PRDX5
SELENOK	1.23E-20	0.255371133	0.888	0.636	2.95E-16	Decidual Stroma 3 (M)	SELENOK
IGFBP52	1.34E-15	0.857067416	0.644	0.597	3.22E-11	Decidual Stroma 3 (M)	IGFBP5
PAEP	0.00625864	0.916369949	0.294	0.213	1	Decidual Stroma 3 (M)	PAEP
APOC1	0.008642695	0.313443308	0.455	0.375	1	Decidual Stroma 3 (M)	APOC1
EGFL6	2.40E-176	1.31092341	0.927	0.269	5.78E-172	Mesenchyme 1 (F)	EGFL6
DLK1	5.66E-176	1.304605988	0.934	0.274	1.36E-171	Mesenchyme 1 (F)	DLK1
COL11A1	2.49E-167	1.182249665	0.874	0.218	5.98E-163	Mesenchyme 1 (F)	COL11A1
ATP1B1	6.46E-160	1.136370979	0.826	0.231	1.55E-155	Mesenchyme 1 (F)	ATP1B1
COL3A1	8.05E-147	1.399501702	0.979	0.665	1.94E-142	Mesenchyme 1 (F)	COL3A1
MATN2	3.19E-145	1.113203158	0.89	0.324	7.67E-141	Mesenchyme 1 (F)	MATN2
SERPINE2	1.11E-141	1.257504949	0.947	0.423	2.67E-137	Mesenchyme 1 (F)	SERPINE2
ELOVL2	2.63E-141	0.929177672	0.755	0.202	6.32E-137	Mesenchyme 1 (F)	ELOVL2
TGFBI	4.81E-141	1.219773299	0.927	0.408	1.16E-136	Mesenchyme 1 (F)	TGFBI
NDUFA4L2	1.65E-136	1.048916729	0.858	0.249	3.97E-132	Mesenchyme 1 (F)	NDUFA4L2
RPS4Y1	2.55E-131	0.873401819	0.799	0.232	6.13E-127	Mesenchyme 1 (F)	RPS4Y1
PLOD2	2.48E-130	0.983645433	0.908	0.377	5.95E-126	Mesenchyme 1 (F)	PLOD2
COL1A1	7.71E-130	1.268593555	0.989	0.71	1.85E-125	Mesenchyme 1 (F)	COL1A1
MEST	1.59E-129	1.177029059	0.899	0.396	3.82E-125	Mesenchyme 1 (F)	MEST
COL5A1	9.76E-128	1.094517401	0.957	0.524	2.35E-123	Mesenchyme 1 (F)	COL5A1
COL1A2	1.84E-127	1.241257376	0.993	0.734	4.42E-123	Mesenchyme 1 (F)	COL1A2
IGF2BP2	6.24E-126	0.832819943	0.719	0.205	1.50E-121	Mesenchyme 1 (F)	IGF2BP2
PRELP	7.49E-125	0.86836186	0.723	0.206	1.80E-120	Mesenchyme 1 (F)	PRELP
CTHRC1	1.86E-124	1.046167556	0.883	0.374	4.47E-120	Mesenchyme 1 (F)	CTHRC1
BST2	2.34E-124	1.0797262	0.911	0.479	5.63E-120	Mesenchyme 1 (F)	BST2
COL15A1	2.08E-120	1.027490456	0.92	0.496	5.01E-116	Mesenchyme 1 (F)	COL15A1
IGFBP3	1.95E-116	1.093718621	0.968	0.717	4.69E-112	Mesenchyme 1 (F)	IGFBP3
SPARC	2.74E-116	1.038868704	0.993	0.872	6.59E-112	Mesenchyme 1 (F)	SPARC
FTL	4.10E-116	0.85325113	1	0.976	9.86E-112	Mesenchyme 1 (F)	FTL
COL5A2	1.46E-114	0.978454801	0.954	0.544	3.51E-110	Mesenchyme 1 (F)	COL5A2
PITX2	2.10E-113	0.696794034	0.691	0.194	5.05E-109	Mesenchyme 1 (F)	PITX2
COL16A1	2.49E-113	0.73308753	0.698	0.204	5.98E-109	Mesenchyme 1 (F)	COL16A1
HAPLN1	7.54E-113	1.165671384	0.693	0.207	1.81E-108	Mesenchyme 1 (F)	HAPLN1
CREB3L1	1.37E-108	0.841453507	0.835	0.36	3.29E-104	Mesenchyme 1 (F)	CREB3L1
PLD3	2.22E-108	0.861660102	0.911	0.584	5.32E-104	Mesenchyme 1 (F)	PLD3
MEG3	6.52E-106	0.983632876	0.975	0.703	1.57E-101	Mesenchyme 1 (F)	MEG3
COL6A1	5.83E-105	0.887741453	0.986	0.73	1.40E-100	Mesenchyme 1 (F)	COL6A1
GPC3	2.59E-103	0.775729625	0.851	0.29	6.21E-99	Mesenchyme 1 (F)	GPC3
PDPN	4.73E-102	0.926577946	0.906	0.545	1.14E-97	Mesenchyme 1 (F)	PDPN
LAMA2	2.40E-100	0.902235178	0.808	0.375	5.76E-96	Mesenchyme 1 (F)	LAMA2
MMP23B	3.23E-100	0.789858836	0.776	0.287	7.77E-96	Mesenchyme 1 (F)	MMP23B
MEG8	1.14E-99	0.882889136	0.764	0.293	2.74E-95	Mesenchyme 1 (F)	MEG8
COL6A2	1.33E-99	0.804703995	0.993	0.838	3.20E-95	Mesenchyme 1 (F)	COL6A2
FMOD	1.02E-98	0.96054099	0.767	0.327	2.45E-94	Mesenchyme 1 (F)	FMOD
CA12	6.66E-95	0.683929483	0.535	0.139	1.60E-90	Mesenchyme 1 (F)	CA12
STXBP6	6.77E-94	0.672504145	0.716	0.236	1.63E-89	Mesenchyme 1 (F)	STXBP6
HMOX1	1.90E-92	0.865819566	0.604	0.189	4.57E-88	Mesenchyme 1 (F)	HMOX1
PLTP	3.58E-92	0.829194836	0.785	0.378	8.61E-88	Mesenchyme 1 (F)	PLTP
PLOD1	1.06E-90	0.72146119	0.771	0.323	2.54E-86	Mesenchyme 1 (F)	PLOD1
COL14A1	2.90E-90	0.798689198	0.874	0.449	6.98E-86	Mesenchyme 1 (F)	COL14A1
TENT5A	3.10E-90	0.841107695	0.76	0.313	7.45E-86	Mesenchyme 1 (F)	TENT5A
SERPINH1	4.77E-90	0.748783136	0.934	0.685	1.15E-85	Mesenchyme 1 (F)	SERPINH1
LOXL2	1.62E-88	0.737819774	0.762	0.292	3.90E-84	Mesenchyme 1 (F)	LOXL2
P4HA1	6.14E-88	0.783819494	0.867	0.472	1.48E-83	Mesenchyme 1 (F)	P4HA1
CHRDL2	6.31E-88	0.811691129	0.428	0.095	1.52E-83	Mesenchyme 1 (F)	CHRDL2
VTN	1.31E-87	0.899856031	0.705	0.296	3.15E-83	Mesenchyme 1 (F)	VTN
TCEA3	3.44E-87	0.551429596	0.519	0.139	8.26E-83	Mesenchyme 1 (F)	TCEA3
RSPO2	1.15E-86	0.593716544	0.478	0.121	2.75E-82	Mesenchyme 1 (F)	RSPO2
BIRC7	1.88E-86	0.55716782	0.446	0.105	4.52E-82	Mesenchyme 1 (F)	BIRC7
MME	1.14E-85	0.769213367	0.863	0.443	2.74E-81	Mesenchyme 1 (F)	MME
CERCAM	4.88E-85	0.792345811	0.796	0.416	1.17E-80	Mesenchyme 1 (F)	CERCAM
P4HB	3.58E-84	0.650051957	0.961	0.834	8.60E-80	Mesenchyme 1 (F)	P4HB
HSD17B2	9.70E-84	0.600264009	0.654	0.219	2.33E-79	Mesenchyme 1 (F)	HSD17B2
CAPS	5.68E-83	0.666014806	0.531	0.158	1.36E-78	Mesenchyme 1 (F)	CAPS
FKBP10	1.03E-82	0.724734792	0.849	0.478	2.47E-78	Mesenchyme 1 (F)	FKBP10
FSTL1	3.61E-81	0.674537771	0.963	0.779	8.67E-77	Mesenchyme 1 (F)	FSTL1
CRABP2	5.67E-81	0.596501778	0.588	0.177	1.36E-76	Mesenchyme 1 (F)	CRABP2
SLC16A3	3.22E-79	0.697002217	0.68	0.26	7.73E-75	Mesenchyme 1 (F)	SLC16A3
LOX	3.86E-79	0.653521751	0.847	0.4	9.28E-75	Mesenchyme 1 (F)	LOX
MFAP41	1.96E-78	0.792551381	0.886	0.533	4.71E-74	Mesenchyme 1 (F)	MFAP4
RARRES2	2.62E-78	0.929753177	0.801	0.437	6.31E-74	Mesenchyme 1 (F)	RARRES2
PTGER2	8.41E-78	0.542847012	0.469	0.124	2.02E-73	Mesenchyme 1 (F)	PTGER2
MRC2	1.76E-77	0.684072959	0.735	0.33	4.23E-73	Mesenchyme 1 (F)	MRC2
ADAM12	5.02E-77	0.58902786	0.67	0.249	1.21E-72	Mesenchyme 1 (F)	ADAM12
COL4A1	5.94E-77	0.718632331	0.961	0.801	1.43E-72	Mesenchyme 1 (F)	COL4A1
PTGDS	1.03E-76	1.123035416	0.867	0.622	2.47E-72	Mesenchyme 1 (F)	PTGDS
KCNQ1OT1	1.03E-76	0.860956678	0.92	0.639	2.47E-72	Mesenchyme 1 (F)	KCNQ1OT1
PCSK6	8.72E-76	0.595385694	0.531	0.166	2.10E-71	Mesenchyme 1 (F)	PCSK6
TIMP1	3.07E-75	0.731086764	0.984	0.906	7.39E-71	Mesenchyme 1 (F)	TIMP1
IER3	5.37E-75	0.959142882	0.851	0.461	1.29E-70	Mesenchyme 1 (F)	IER3
SLIT2	9.74E-75	0.587366404	0.558	0.175	2.34E-70	Mesenchyme 1 (F)	SLIT2
LAMC3	2.18E-73	0.654681953	0.675	0.301	5.24E-69	Mesenchyme 1 (F)	LAMC3
SLC22A3	9.40E-73	0.52691767	0.451	0.126	2.26E-68	Mesenchyme 1 (F)	SLC22A3
EIF4EBP1	4.61E-72	0.656907679	0.675	0.302	1.11E-67	Mesenchyme 1 (F)	EIF4EBP1
DPP4	9.94E-72	0.559226393	0.616	0.218	2.39E-67	Mesenchyme 1 (F)	DPP4
COL4A2	1.51E-71	0.642735451	0.963	0.808	3.63E-67	Mesenchyme 1 (F)	COL4A2
C3orf58	2.03E-71	0.762879531	0.654	0.293	4.89E-67	Mesenchyme 1 (F)	C3orf58
RCN3	8.74E-71	0.66444787	0.783	0.412	2.10E-66	Mesenchyme 1 (F)	RCN3
SERPINF11	2.52E-70	0.699180051	0.915	0.684	6.05E-66	Mesenchyme 1 (F)	SERPINF1
MFAP2	3.15E-70	0.589819522	0.609	0.222	7.57E-66	Mesenchyme 1 (F)	MFAP2
PKIB	7.58E-70	0.503817017	0.336	0.073	1.82E-65	Mesenchyme 1 (F)	PKIB
ZFP36L1	1.52E-69	0.707185752	0.945	0.824	3.65E-65	Mesenchyme 1 (F)	ZFP36L1
DES	8.08E-69	0.495160936	0.666	0.243	1.94E-64	Mesenchyme 1 (F)	DES
S100A10	1.59E-68	0.720518264	0.945	0.544	3.83E-64	Mesenchyme 1 (F)	S100A10
F10	5.07E-67	0.633288764	0.634	0.282	1.22E-62	Mesenchyme 1 (F)	F10
CCND2	9.04E-67	0.636692963	0.817	0.47	2.17E-62	Mesenchyme 1 (F)	CCND2
CXCL14	9.75E-67	0.950124395	0.796	0.426	2.34E-62	Mesenchyme 1 (F)	CXCL14
SEMA6D	1.27E-66	0.481351986	0.348	0.08	3.04E-62	Mesenchyme 1 (F)	SEMA6D
GJA11	4.51E-66	0.673334419	0.913	0.692	1.08E-61	Mesenchyme 1 (F)	GJA1
TSHZ1	1.99E-65	0.563909166	0.565	0.216	4.77E-61	Mesenchyme 1 (F)	TSHZ1
BSG	3.54E-65	0.562121402	0.936	0.815	8.51E-61	Mesenchyme 1 (F)	BSG
EGLN3	3.54E-65	0.710582991	0.673	0.282	8.52E-61	Mesenchyme 1 (F)	EGLN3
RPS26	7.14E-65	0.541572359	0.943	0.833	1.72E-60	Mesenchyme 1 (F)	RPS26
LOXL1	2.46E-63	0.582916398	0.611	0.237	5.91E-59	Mesenchyme 1 (F)	LOXL1
FSCN1	4.23E-63	0.595386625	0.707	0.329	1.02E-58	Mesenchyme 1 (F)	FSCN1
IGF2.1	4.29E-63	0.552890173	0.693	0.294	1.03E-58	Mesenchyme 1 (F)	IGF2.1
PTK7	6.40E-63	0.632787145	0.725	0.378	1.54E-58	Mesenchyme 1 (F)	PTK7
C1R	1.03E-62	0.567156906	0.938	0.776	2.48E-58	Mesenchyme 1 (F)	C1R
FNDC3B	1.07E-62	0.621116307	0.881	0.616	2.58E-58	Mesenchyme 1 (F)	FNDC3B
LOXL4	1.24E-62	0.45096877	0.455	0.139	2.97E-58	Mesenchyme 1 (F)	LOXL4
IGDCC4	3.94E-62	0.39831148	0.355	0.087	9.46E-58	Mesenchyme 1 (F)	IGDCC4
SLC12A8	6.46E-62	0.516765497	0.428	0.13	1.55E-57	Mesenchyme 1 (F)	SLC12A8
MAN1A1	8.17E-61	0.633045001	0.824	0.541	1.96E-56	Mesenchyme 1 (F)	MAN1A1
MXRA5	1.46E-60	0.54377743	0.471	0.151	3.51E-56	Mesenchyme 1 (F)	MXRA5
NR3C1	6.50E-60	0.574943784	0.673	0.327	1.56E-55	Mesenchyme 1 (F)	NR3C1
COL6A3	2.42E-58	0.633661127	0.918	0.673	5.81E-54	Mesenchyme 1 (F)	COL6A3
CSRP2	7.25E-58	0.478988241	0.654	0.269	1.74E-53	Mesenchyme 1 (F)	CSRP2
TMEM176A	1.14E-57	0.763044574	0.577	0.241	2.74E-53	Mesenchyme 1 (F)	TMEM176A
RRBP1	1.67E-57	0.522243675	0.918	0.745	4.02E-53	Mesenchyme 1 (F)	RRBP1
STC2	3.15E-57	0.577058424	0.508	0.175	7.58E-53	Mesenchyme 1 (F)	STC2
LGALS3BP	3.38E-57	0.542319067	0.906	0.699	8.12E-53	Mesenchyme 1 (F)	LGALS3BP
PLA2G2A	6.76E-57	0.565522209	0.51	0.183	1.63E-52	Mesenchyme 1 (F)	PLA2G2A
ZEB2	7.00E-57	0.446505432	0.716	0.347	1.68E-52	Mesenchyme 1 (F)	ZEB2
TPI1	1.60E-56	0.559418264	0.924	0.759	3.84E-52	Mesenchyme 1 (F)	TPI1
PLAGL1	1.62E-56	0.656427828	0.815	0.556	3.90E-52	Mesenchyme 1 (F)	PLAGL1
KCNE4	5.30E-56	0.636784208	0.506	0.185	1.27E-51	Mesenchyme 1 (F)	KCNE4
HES1	2.13E-55	0.77594094	0.819	0.491	5.11E-51	Mesenchyme 1 (F)	HES1
SPINT2	2.65E-54	0.533340917	0.499	0.187	6.36E-50	Mesenchyme 1 (F)	SPINT2
STC1	1.95E-53	0.670676371	0.325	0.084	4.68E-49	Mesenchyme 1 (F)	STC1
TMEM176B	2.90E-53	0.668820714	0.6	0.271	6.98E-49	Mesenchyme 1 (F)	TMEM176B
DSG2	3.31E-53	0.476039006	0.435	0.147	7.96E-49	Mesenchyme 1 (F)	DSG2
IGF2BP1	5.52E-53	0.373560293	0.362	0.102	1.33E-48	Mesenchyme 1 (F)	IGF2BP1
SMIM1	7.33E-53	0.29643516	0.268	0.058	1.76E-48	Mesenchyme 1 (F)	SMIM1
PDE4DIP	4.24E-52	0.508565228	0.547	0.236	1.02E-47	Mesenchyme 1 (F)	PDE4DIP
PLP2	2.55E-51	0.522963646	0.732	0.421	6.12E-47	Mesenchyme 1 (F)	PLP2
SOX6	9.65E-51	0.367442468	0.35	0.102	2.32E-46	Mesenchyme 1 (F)	SOX6
PHLDA3	1.21E-50	0.500772446	0.503	0.2	2.91E-46	Mesenchyme 1 (F)	PHLDA3
ADGRA2	2.04E-50	0.515582133	0.57	0.257	4.90E-46	Mesenchyme 1 (F)	ADGRA2
ZNF395	1.44E-49	0.459227396	0.465	0.176	3.45E-45	Mesenchyme 1 (F)	ZNF395
PPFIBP1	2.13E-49	0.289957642	0.778	0.369	5.13E-45	Mesenchyme 1 (F)	PPFIBP1
TGFBR3	3.43E-49	0.571540885	0.728	0.434	8.24E-45	Mesenchyme 1 (F)	TGFBR3
FN1	5.20E-49	0.352638682	0.984	0.97	1.25E-44	Mesenchyme 1 (F)	FN1
SVEP1	7.03E-49	0.38620642	0.467	0.176	1.69E-44	Mesenchyme 1 (F)	SVEP1
FAH	1.76E-48	0.362748371	0.362	0.114	4.22E-44	Mesenchyme 1 (F)	FAH
HSPA1A	1.95E-48	0.849272075	0.876	0.692	4.68E-44	Mesenchyme 1 (F)	HSPA1A
TSPAN13	6.54E-48	0.429646465	0.394	0.129	1.57E-43	Mesenchyme 1 (F)	TSPAN13
CSGALNACT1	7.74E-48	0.436695807	0.487	0.185	1.86E-43	Mesenchyme 1 (F)	CSGALNACT1
ERO1A	9.64E-48	0.556670782	0.661	0.357	2.32E-43	Mesenchyme 1 (F)	ERO1A
SCD	1.15E-47	0.432191308	0.412	0.14	2.76E-43	Mesenchyme 1 (F)	SCD
ITGA11	1.53E-47	0.404556333	0.444	0.156	3.68E-43	Mesenchyme 1 (F)	ITGA11
GPX8	4.02E-47	0.532176941	0.705	0.422	9.65E-43	Mesenchyme 1 (F)	GPX8
P3H1	4.39E-47	0.479776958	0.57	0.265	1.06E-42	Mesenchyme 1 (F)	P3H1
FGFR1	5.08E-47	0.519208821	0.709	0.402	1.22E-42	Mesenchyme 1 (F)	FGFR1
OLFML3	1.15E-46	0.485362396	0.844	0.611	2.76E-42	Mesenchyme 1 (F)	OLFML3
RSPO3	1.21E-46	0.514361217	0.545	0.232	2.90E-42	Mesenchyme 1 (F)	RSPO3
SMIM3	1.62E-46	0.491780583	0.542	0.242	3.89E-42	Mesenchyme 1 (F)	SMIM3
LOXL3	1.88E-46	0.363703889	0.437	0.16	4.51E-42	Mesenchyme 1 (F)	LOXL3
PCDH10	2.70E-46	0.517946947	0.419	0.146	6.49E-42	Mesenchyme 1 (F)	PCDH10
SQLE	5.02E-46	0.420336393	0.531	0.222	1.21E-41	Mesenchyme 1 (F)	SQLE
DDIT4	5.20E-46	0.71060704	0.666	0.365	1.25E-41	Mesenchyme 1 (F)	DDIT4
GAS7	8.44E-46	0.419898984	0.467	0.183	2.03E-41	Mesenchyme 1 (F)	GAS7
FIBIN	8.90E-46	0.32763415	0.355	0.106	2.14E-41	Mesenchyme 1 (F)	FIBIN
COLGALT1	1.11E-45	0.451872235	0.579	0.278	2.67E-41	Mesenchyme 1 (F)	COLGALT1
PLXNB2	1.33E-45	0.504824557	0.625	0.338	3.20E-41	Mesenchyme 1 (F)	PLXNB2
COL8A2	2.11E-45	0.375526693	0.348	0.108	5.08E-41	Mesenchyme 1 (F)	COL8A2
FMNL2	2.45E-45	0.453217383	0.439	0.167	5.89E-41	Mesenchyme 1 (F)	FMNL2
MDFI	2.79E-45	0.339477812	0.304	0.086	6.71E-41	Mesenchyme 1 (F)	MDFI
HSPA2	3.38E-45	0.494490084	0.767	0.467	8.12E-41	Mesenchyme 1 (F)	HSPA2
BNIP3	4.35E-45	0.577696726	0.753	0.481	1.05E-40	Mesenchyme 1 (F)	BNIP3
IQGAP2	5.72E-45	0.426012193	0.339	0.102	1.38E-40	Mesenchyme 1 (F)	IQGAP2
GATA4	6.44E-45	0.296099042	0.265	0.066	1.55E-40	Mesenchyme 1 (F)	GATA4
HSPB7	8.02E-45	0.468725514	0.41	0.151	1.93E-40	Mesenchyme 1 (F)	HSPB7
P3H4	2.69E-44	0.463558378	0.547	0.252	6.45E-40	Mesenchyme 1 (F)	P3H4
AGPAT2	6.80E-44	0.450559681	0.506	0.228	1.63E-39	Mesenchyme 1 (F)	AGPAT2
TTC3	1.07E-43	0.492885338	0.854	0.655	2.57E-39	Mesenchyme 1 (F)	TTC3
HIF3A	1.19E-43	0.359215686	0.318	0.095	2.86E-39	Mesenchyme 1 (F)	HIF3A
KDELR2	1.37E-43	0.471888344	0.865	0.701	3.29E-39	Mesenchyme 1 (F)	KDELR2
EMILIN1	1.40E-43	0.522033312	0.776	0.529	3.36E-39	Mesenchyme 1 (F)	EMILIN1
GDF6	3.94E-43	0.393217635	0.332	0.103	9.47E-39	Mesenchyme 1 (F)	GDF6
RHOU1	5.76E-43	0.507839769	0.705	0.425	1.39E-38	Mesenchyme 1 (F)	RHOU
WSB1	6.99E-43	0.565159878	0.84	0.667	1.68E-38	Mesenchyme 1 (F)	WSB1
CSPG4	1.36E-42	0.376462943	0.357	0.118	3.27E-38	Mesenchyme 1 (F)	CSPG4
ADSSL1	1.68E-42	0.333417692	0.27	0.072	4.04E-38	Mesenchyme 1 (F)	ADSSL1
EML4	1.96E-42	0.45765336	0.586	0.286	4.70E-38	Mesenchyme 1 (F)	EML4
FOSB	1.96E-42	0.551093909	0.957	0.809	4.71E-38	Mesenchyme 1 (F)	FOSB
P4HA2	3.71E-42	0.45764406	0.689	0.378	8.91E-38	Mesenchyme 1 (F)	P4HA2
FADS1	3.90E-42	0.561591863	0.609	0.322	9.38E-38	Mesenchyme 1 (F)	FADS1
AGPAT4	9.57E-42	0.410644006	0.449	0.187	2.30E-37	Mesenchyme 1 (F)	AGPAT4
MAGED1	9.61E-42	0.504838888	0.696	0.427	2.31E-37	Mesenchyme 1 (F)	MAGED1
SEZ6L2	9.92E-42	0.469163954	0.611	0.333	2.38E-37	Mesenchyme 1 (F)	SEZ6L2
PABPC4L	1.37E-41	0.300998601	0.323	0.098	3.29E-37	Mesenchyme 1 (F)	PABPC4L
RUNX1	3.10E-41	0.402162632	0.467	0.195	7.45E-37	Mesenchyme 1 (F)	RUNX1
HTRA3	3.48E-41	0.43382921	0.449	0.185	8.36E-37	Mesenchyme 1 (F)	HTRA3
GPX7	3.48E-41	0.392687541	0.51	0.237	8.36E-37	Mesenchyme 1 (F)	GPX7
COL9A3	7.57E-41	0.404628201	0.307	0.093	1.82E-36	Mesenchyme 1 (F)	COL9A3
KDELR3	8.64E-41	0.433869976	0.531	0.243	2.08E-36	Mesenchyme 1 (F)	KDELR3
FUS	1.49E-40	0.510127478	0.892	0.722	3.58E-36	Mesenchyme 1 (F)	FUS
VAMP8	1.12E-39	0.380554328	0.387	0.143	2.69E-35	Mesenchyme 1 (F)	VAMP8
TYMP	2.84E-39	0.448909886	0.819	0.552	6.81E-35	Mesenchyme 1 (F)	TYMP
DDX3Y	3.65E-39	0.338905252	0.316	0.101	8.78E-35	Mesenchyme 1 (F)	DDX3Y
PDIA5	7.13E-39	0.452301677	0.547	0.27	1.71E-34	Mesenchyme 1 (F)	PDIA5
GUCY1A1	7.49E-39	0.382892921	0.412	0.157	1.80E-34	Mesenchyme 1 (F)	GUCY1A1
PLPP31	9.27E-39	0.534581006	0.778	0.529	2.23E-34	Mesenchyme 1 (F)	PLPP3
ARID3A	1.57E-38	0.445133736	0.485	0.22	3.77E-34	Mesenchyme 1 (F)	ARID3A
ZADH2	1.64E-38	0.456125331	0.437	0.193	3.95E-34	Mesenchyme 1 (F)	ZADH2
NEU1	1.88E-38	0.521927022	0.588	0.325	4.52E-34	Mesenchyme 1 (F)	NEU1
FBLN2	2.48E-38	0.435568138	0.874	0.629	5.97E-34	Mesenchyme 1 (F)	FBLN2
PLAC9	3.04E-38	0.545059245	0.664	0.409	7.30E-34	Mesenchyme 1 (F)	PLAC9
S100A11	3.17E-38	0.36239474	0.959	0.87	7.63E-34	Mesenchyme 1 (F)	S100A11
CLMP	1.09E-37	0.479624256	0.771	0.509	2.63E-33	Mesenchyme 1 (F)	CLMP
MORC4	2.28E-37	0.417862136	0.513	0.243	5.48E-33	Mesenchyme 1 (F)	MORC4
BGN	3.75E-37	0.334755698	0.556	0.255	9.00E-33	Mesenchyme 1 (F)	BGN
PCOLCE1	1.06E-36	0.471505501	0.911	0.717	2.56E-32	Mesenchyme 1 (F)	PCOLCE
ALCAM	1.90E-36	0.430235091	0.458	0.199	4.56E-32	Mesenchyme 1 (F)	ALCAM
CKAP4	1.90E-36	0.479233236	0.762	0.497	4.56E-32	Mesenchyme 1 (F)	CKAP4
FZD2	3.50E-36	0.270955804	0.302	0.099	8.40E-32	Mesenchyme 1 (F)	FZD2
CDKN1A	9.86E-36	0.538477392	0.542	0.273	2.37E-31	Mesenchyme 1 (F)	CDKN1A
TENT5C	1.58E-35	0.343015103	0.35	0.13	3.80E-31	Mesenchyme 1 (F)	TENT5C
JAM3	1.62E-35	0.437857217	0.554	0.291	3.90E-31	Mesenchyme 1 (F)	JAM3
BAMBI	2.05E-35	0.397319317	0.487	0.229	4.92E-31	Mesenchyme 1 (F)	BAMBI
CCDC8	2.20E-35	0.30517565	0.325	0.116	5.29E-31	Mesenchyme 1 (F)	CCDC8
CDH111	2.46E-35	0.454180366	0.856	0.62	5.91E-31	Mesenchyme 1 (F)	CDH11
SETBP1	3.31E-35	0.31352695	0.359	0.134	7.97E-31	Mesenchyme 1 (F)	SETBP1
PEG3	7.36E-35	0.710291865	0.497	0.254	1.77E-30	Mesenchyme 1 (F)	PEG3
APOC11	9.39E-35	0.428791063	0.627	0.355	2.26E-30	Mesenchyme 1 (F)	APOC1
TET1	1.26E-34	0.406190547	0.359	0.141	3.03E-30	Mesenchyme 1 (F)	TET1
COL21A1	2.29E-34	0.42969144	0.469	0.217	5.50E-30	Mesenchyme 1 (F)	COL21A1
LRP1	2.43E-34	0.418519582	0.789	0.572	5.83E-30	Mesenchyme 1 (F)	LRP1
TSC22D3	7.95E-34	0.562037015	0.666	0.436	1.91E-29	Mesenchyme 1 (F)	TSC22D3
CMKLR1	1.12E-33	0.291120192	0.27	0.083	2.68E-29	Mesenchyme 1 (F)	CMKLR1
FAM13A	2.97E-33	0.385752853	0.435	0.199	7.13E-29	Mesenchyme 1 (F)	FAM13A
CLEC11A	3.82E-33	0.44955803	0.499	0.255	9.19E-29	Mesenchyme 1 (F)	CLEC11A
NREP	5.33E-33	0.405598394	0.458	0.211	1.28E-28	Mesenchyme 1 (F)	NREP
RAB11FIP1	6.34E-33	0.428258226	0.606	0.322	1.52E-28	Mesenchyme 1 (F)	RAB11FIP1
RFLNB	6.60E-33	0.28396515	0.265	0.084	1.59E-28	Mesenchyme 1 (F)	RFLNB
PHACTR2	1.16E-32	0.412274639	0.778	0.582	2.80E-28	Mesenchyme 1 (F)	PHACTR2
ITGBL1	1.56E-32	0.348846168	0.387	0.156	3.75E-28	Mesenchyme 1 (F)	ITGBL1
NME4	1.61E-32	0.454859923	0.709	0.508	3.86E-28	Mesenchyme 1 (F)	NME4
PFKP	2.43E-32	0.363317579	0.492	0.237	5.84E-28	Mesenchyme 1 (F)	PFKP
PITX1	8.00E-32	0.336413896	0.339	0.127	1.92E-27	Mesenchyme 1 (F)	PITX1
SCARB2	8.58E-32	0.442228841	0.744	0.565	2.06E-27	Mesenchyme 1 (F)	SCARB2
QPRT	2.27E-31	0.351310528	0.465	0.229	5.45E-27	Mesenchyme 1 (F)	QPRT
EMP3	4.64E-31	0.390075632	0.892	0.696	1.12E-26	Mesenchyme 1 (F)	EMP3
SERINC5	4.81E-31	0.393816529	0.373	0.16	1.16E-26	Mesenchyme 1 (F)	SERINC5
TMED9	5.90E-31	0.377418625	0.835	0.664	1.42E-26	Mesenchyme 1 (F)	TMED9
PYCR1	1.24E-30	0.281362578	0.378	0.154	2.97E-26	Mesenchyme 1 (F)	PYCR1
FAM20C	2.28E-30	0.314152202	0.371	0.158	5.48E-26	Mesenchyme 1 (F)	FAM20C
LAMB2	4.19E-30	0.396730949	0.721	0.5	1.01E-25	Mesenchyme 1 (F)	LAMB2
IL11RA	4.69E-30	0.285688112	0.314	0.119	1.13E-25	Mesenchyme 1 (F)	IL11RA
NKAIN4	9.11E-30	0.305726867	0.256	0.085	2.19E-25	Mesenchyme 1 (F)	NKAIN4
LDHA	9.77E-30	0.375744387	0.906	0.796	2.35E-25	Mesenchyme 1 (F)	LDHA
P3H3	1.86E-29	0.35567065	0.483	0.252	4.48E-25	Mesenchyme 1 (F)	P3H3
TENM3	2.82E-29	0.316713728	0.291	0.105	6.77E-25	Mesenchyme 1 (F)	TENM3
ENO1	4.63E-29	0.462921907	0.865	0.749	1.11E-24	Mesenchyme 1 (F)	ENO1
SEMA4B	6.99E-29	0.303758523	0.304	0.116	1.68E-24	Mesenchyme 1 (F)	SEMA4B
ITPR2	8.91E-29	0.398216979	0.423	0.206	2.14E-24	Mesenchyme 1 (F)	ITPR2
EFEMP2	9.14E-29	0.384577846	0.796	0.619	2.20E-24	Mesenchyme 1 (F)	EFEMP2
COPZ2	9.20E-29	0.417883259	0.753	0.543	2.21E-24	Mesenchyme 1 (F)	COPZ2
KRT8	9.47E-29	0.31425028	0.686	0.432	2.28E-24	Mesenchyme 1 (F)	KRT8
LMO7	1.07E-28	0.363973377	0.416	0.196	2.58E-24	Mesenchyme 1 (F)	LMO7
C1QL1	1.21E-28	0.260729645	0.295	0.105	2.90E-24	Mesenchyme 1 (F)	C1QL1
ITM2C	1.76E-28	0.343220769	0.517	0.275	4.23E-24	Mesenchyme 1 (F)	ITM2C
PNCK	2.05E-28	0.315782084	0.318	0.125	4.93E-24	Mesenchyme 1 (F)	PNCK
FKBP7	3.34E-28	0.394672871	0.535	0.31	8.02E-24	Mesenchyme 1 (F)	FKBP7
TMEM91	1.84E-27	0.380729455	0.382	0.178	4.42E-23	Mesenchyme 1 (F)	TMEM91
GALNT2	2.13E-27	0.371640413	0.538	0.308	5.12E-23	Mesenchyme 1 (F)	GALNT2
F3	3.67E-27	0.397489241	0.792	0.547	8.81E-23	Mesenchyme 1 (F)	F3
PRDX4	9.15E-27	0.410086834	0.801	0.645	2.20E-22	Mesenchyme 1 (F)	PRDX4
PRDM6	1.31E-26	0.30442244	0.295	0.117	3.14E-22	Mesenchyme 1 (F)	PRDM6
ARHGAP28	2.88E-26	0.282126488	0.307	0.124	6.91E-22	Mesenchyme 1 (F)	ARHGAP28
NOTCH2	3.03E-26	0.305297844	0.391	0.185	7.28E-22	Mesenchyme 1 (F)	NOTCH2
ACVR2A	5.09E-26	0.301250524	0.295	0.117	1.22E-21	Mesenchyme 1 (F)	ACVR2A
EML1	8.59E-26	0.337053473	0.398	0.198	2.06E-21	Mesenchyme 1 (F)	EML1
FOXO3	9.61E-26	0.294707963	0.439	0.225	2.31E-21	Mesenchyme 1 (F)	FOXO3
CTSD	1.30E-25	0.386323515	0.833	0.661	3.12E-21	Mesenchyme 1 (F)	CTSD
LRRC32	1.50E-25	0.298624289	0.471	0.242	3.61E-21	Mesenchyme 1 (F)	LRRC32
BST1	1.52E-25	0.358118204	0.437	0.233	3.65E-21	Mesenchyme 1 (F)	BST1
RAP2B	1.68E-25	0.307628912	0.382	0.183	4.04E-21	Mesenchyme 1 (F)	RAP2B
PKM	2.09E-25	0.368985531	0.817	0.67	5.03E-21	Mesenchyme 1 (F)	PKM
TGFB3	2.15E-25	0.284478299	0.268	0.1	5.17E-21	Mesenchyme 1 (F)	TGFB3
B4GALT1	3.01E-25	0.358483062	0.535	0.32	7.24E-21	Mesenchyme 1 (F)	B4GALT1
KRT19	3.23E-25	0.432737412	0.654	0.435	7.77E-21	Mesenchyme 1 (F)	KRT19
PDXK	3.65E-25	0.330990239	0.503	0.288	8.78E-21	Mesenchyme 1 (F)	PDXK
ADAMTS11	3.97E-25	0.4022263	0.881	0.695	9.54E-21	Mesenchyme 1 (F)	ADAMTS1
AEBP1	4.36E-25	0.343694733	0.847	0.692	1.05E-20	Mesenchyme 1 (F)	AEBP1
DSE	5.21E-25	0.328174613	0.394	0.197	1.25E-20	Mesenchyme 1 (F)	DSE
ZFAS1	7.32E-25	0.418327407	0.822	0.695	1.76E-20	Mesenchyme 1 (F)	ZFAS1
PLAUR	1.25E-24	0.354977233	0.558	0.343	3.01E-20	Mesenchyme 1 (F)	PLAUR
DPP7	1.41E-24	0.388659459	0.657	0.467	3.40E-20	Mesenchyme 1 (F)	DPP7
SRPX	1.48E-24	0.434364668	0.579	0.378	3.55E-20	Mesenchyme 1 (F)	SRPX
SOX5	3.23E-24	0.311455507	0.314	0.136	7.75E-20	Mesenchyme 1 (F)	SOX5
DEPTOR1	3.54E-24	0.358910233	0.446	0.242	8.51E-20	Mesenchyme 1 (F)	DEPTOR
LMNA	4.67E-24	0.308009672	0.906	0.787	1.12E-19	Mesenchyme 1 (F)	LMNA
DDOST	6.90E-24	0.353327411	0.719	0.537	1.66E-19	Mesenchyme 1 (F)	DDOST
INTS6	1.12E-23	0.376426088	0.595	0.39	2.70E-19	Mesenchyme 1 (F)	INTS6
GAPDH	1.22E-23	0.332273642	0.97	0.939	2.94E-19	Mesenchyme 1 (F)	GAPDH
ATP1A1	3.07E-23	0.331274173	0.574	0.357	7.38E-19	Mesenchyme 1 (F)	ATP1A1
DCN2	3.16E-23	0.274521794	0.998	0.818	7.60E-19	Mesenchyme 1 (F)	DCN
MSH6	3.20E-23	0.273631963	0.35	0.167	7.70E-19	Mesenchyme 1 (F)	MSH6
HSP90AA1	3.45E-23	0.377776263	0.979	0.942	8.30E-19	Mesenchyme 1 (F)	HSP90AA1
EGR11	3.93E-23	0.452194463	0.913	0.793	9.44E-19	Mesenchyme 1 (F)	EGR1
TSPO	4.17E-23	0.310461916	0.851	0.73	1.00E-18	Mesenchyme 1 (F)	TSPO
PGK1	4.96E-23	0.372113368	0.808	0.661	1.19E-18	Mesenchyme 1 (F)	PGK1
FADS2	5.82E-23	0.326658571	0.428	0.227	1.40E-18	Mesenchyme 1 (F)	FADS2
IRAK3	5.87E-23	0.294273724	0.336	0.158	1.41E-18	Mesenchyme 1 (F)	IRAK3
PROS1	7.37E-23	0.382384029	0.506	0.319	1.77E-18	Mesenchyme 1 (F)	PROS1
DNAJB1	8.04E-23	0.496696975	0.769	0.587	1.93E-18	Mesenchyme 1 (F)	DNAJB1
IDI1	1.63E-22	0.382083575	0.435	0.245	3.92E-18	Mesenchyme 1 (F)	IDI1
CMIP	2.20E-22	0.307892588	0.439	0.241	5.29E-18	Mesenchyme 1 (F)	CMIP
POFUT2	2.31E-22	0.277217002	0.348	0.17	5.55E-18	Mesenchyme 1 (F)	POFUT2
KLF2	2.60E-22	0.312762356	0.499	0.278	6.25E-18	Mesenchyme 1 (F)	KLF2
GRN	3.52E-22	0.309306564	0.835	0.721	8.45E-18	Mesenchyme 1 (F)	GRN
ANPEP	4.03E-22	0.299668702	0.35	0.174	9.68E-18	Mesenchyme 1 (F)	ANPEP
KDELR1	5.54E-22	0.319165286	0.819	0.679	1.33E-17	Mesenchyme 1 (F)	KDELR1
SLC6A81	7.47E-22	0.343544323	0.497	0.292	1.80E-17	Mesenchyme 1 (F)	SLC6A8
TNS3	1.06E-21	0.298960845	0.4	0.21	2.54E-17	Mesenchyme 1 (F)	TNS3
LY6E	1.12E-21	0.264803154	0.954	0.906	2.70E-17	Mesenchyme 1 (F)	LY6E
HEXIM1	1.36E-21	0.330585865	0.453	0.263	3.28E-17	Mesenchyme 1 (F)	HEXIM1
CRISPLD22	1.42E-21	0.330785281	0.904	0.684	3.40E-17	Mesenchyme 1 (F)	CRISPLD2
CHPF	1.53E-21	0.363935129	0.625	0.434	3.68E-17	Mesenchyme 1 (F)	CHPF
HMGCS1	2.36E-21	0.319383463	0.375	0.193	5.68E-17	Mesenchyme 1 (F)	HMGCS1
TFRC	3.40E-21	0.463257692	0.558	0.363	8.17E-17	Mesenchyme 1 (F)	TFRC
GLG1	3.42E-21	0.342445273	0.689	0.511	8.22E-17	Mesenchyme 1 (F)	GLG1
CCND3	4.92E-21	0.264081445	0.423	0.235	1.18E-16	Mesenchyme 1 (F)	CCND3
INSIG1	7.58E-21	0.346808513	0.366	0.185	1.82E-16	Mesenchyme 1 (F)	INSIG1
SLC17A5	8.84E-21	0.282470326	0.334	0.163	2.12E-16	Mesenchyme 1 (F)	SLC17A5
LAMB1	1.00E-20	0.412896887	0.703	0.545	2.40E-16	Mesenchyme 1 (F)	LAMB1
MEIS2	1.05E-20	0.311955239	0.387	0.207	2.53E-16	Mesenchyme 1 (F)	MEIS2
NR2F1	1.33E-20	0.329269495	0.451	0.249	3.19E-16	Mesenchyme 1 (F)	NR2F1
GPI	1.37E-20	0.367067953	0.54	0.354	3.30E-16	Mesenchyme 1 (F)	GPI
RPL36A	1.38E-20	0.431972017	0.68	0.542	3.32E-16	Mesenchyme 1 (F)	RPL36A
HDLBP	3.19E-20	0.298776629	0.833	0.713	7.67E-16	Mesenchyme 1 (F)	HDLBP
CALR	3.34E-20	0.334776815	0.908	0.845	8.03E-16	Mesenchyme 1 (F)	CALR
UBB	4.17E-20	0.26837669	0.936	0.891	1.00E-15	Mesenchyme 1 (F)	UBB
TRAM2	5.67E-20	0.299622545	0.46	0.277	1.36E-15	Mesenchyme 1 (F)	TRAM2
DSEL	6.27E-20	0.401443456	0.51	0.33	1.51E-15	Mesenchyme 1 (F)	DSEL
S100A41	6.76E-20	0.289418382	0.947	0.78	1.63E-15	Mesenchyme 1 (F)	S100A4
ATF4	8.05E-20	0.364038525	0.732	0.589	1.94E-15	Mesenchyme 1 (F)	ATF4
AMOTL1	9.08E-20	0.252914688	0.32	0.154	2.18E-15	Mesenchyme 1 (F)	AMOTL1
RXRA	1.27E-19	0.331390737	0.346	0.184	3.06E-15	Mesenchyme 1 (F)	RXRA
PLXND1	1.99E-19	0.31451386	0.542	0.358	4.78E-15	Mesenchyme 1 (F)	PLXND1
SEC31A	1.99E-19	0.294058245	0.805	0.649	4.79E-15	Mesenchyme 1 (F)	SEC31A
HILPDA	2.33E-19	0.489873518	0.481	0.301	5.59E-15	Mesenchyme 1 (F)	HILPDA
GNAI1	3.46E-19	0.312916575	0.508	0.328	8.31E-15	Mesenchyme 1 (F)	GNAI1
LIFR	5.48E-19	0.308047558	0.352	0.182	1.32E-14	Mesenchyme 1 (F)	LIFR
FSTL3	6.05E-19	0.304515673	0.65	0.451	1.45E-14	Mesenchyme 1 (F)	FSTL3
ANKRD50	8.07E-19	0.253331958	0.297	0.142	1.94E-14	Mesenchyme 1 (F)	ANKRD50
BRD2	8.94E-19	0.343841281	0.714	0.572	2.15E-14	Mesenchyme 1 (F)	BRD2
AHCYL1	1.01E-18	0.310528685	0.693	0.524	2.43E-14	Mesenchyme 1 (F)	AHCYL1
MAP3K20	1.03E-18	0.348482407	0.611	0.449	2.48E-14	Mesenchyme 1 (F)	MAP3K20
CD99	1.16E-18	0.254753267	0.906	0.862	2.79E-14	Mesenchyme 1 (F)	CD99
AKR1B1	1.19E-18	0.334529467	0.435	0.261	2.86E-14	Mesenchyme 1 (F)	AKR1B1
NOL3	1.37E-18	0.257512027	0.295	0.143	3.30E-14	Mesenchyme 1 (F)	NOL3
PPIC	1.77E-18	0.286299485	0.755	0.614	4.24E-14	Mesenchyme 1 (F)	PPIC
TGFBR1	1.85E-18	0.333471648	0.558	0.364	4.45E-14	Mesenchyme 1 (F)	TGFBR1
LMCD1	2.32E-18	0.355707116	0.691	0.483	5.58E-14	Mesenchyme 1 (F)	LMCD1
NNMT	2.33E-18	0.266849757	0.883	0.774	5.61E-14	Mesenchyme 1 (F)	NNMT
AK4	2.47E-18	0.297198577	0.284	0.133	5.94E-14	Mesenchyme 1 (F)	AK4
RCN1	3.05E-18	0.29398178	0.792	0.668	7.34E-14	Mesenchyme 1 (F)	RCN1
PDZRN3	3.61E-18	0.26580953	0.334	0.173	8.67E-14	Mesenchyme 1 (F)	PDZRN3
NDUFA13	3.91E-18	0.333521677	0.579	0.416	9.40E-14	Mesenchyme 1 (F)	NDUFA13
CEBPD	4.66E-18	0.29771934	0.915	0.844	1.12E-13	Mesenchyme 1 (F)	CEBPD
BACH1	6.10E-18	0.304841657	0.545	0.359	1.47E-13	Mesenchyme 1 (F)	BACH1
EXT1	7.00E-18	0.287032797	0.423	0.251	1.68E-13	Mesenchyme 1 (F)	EXT1
KSR1	9.52E-18	0.2670524	0.318	0.167	2.29E-13	Mesenchyme 1 (F)	KSR1
ESYT2	1.00E-17	0.282989594	0.423	0.255	2.40E-13	Mesenchyme 1 (F)	ESYT2
CHID1	1.12E-17	0.325263932	0.59	0.427	2.69E-13	Mesenchyme 1 (F)	CHID1
SLC1A5	1.26E-17	0.273917876	0.494	0.317	3.04E-13	Mesenchyme 1 (F)	SLC1A5
MAZ	1.38E-17	0.2816467	0.462	0.284	3.32E-13	Mesenchyme 1 (F)	MAZ
RPS10	1.38E-17	0.462654742	0.725	0.639	3.32E-13	Mesenchyme 1 (F)	RPS10
SRSF7	1.84E-17	0.462078414	0.771	0.656	4.43E-13	Mesenchyme 1 (F)	SRSF7
TPST12	2.22E-17	0.288940806	0.634	0.45	5.33E-13	Mesenchyme 1 (F)	TPST1
TMEM141	4.24E-17	0.283665668	0.533	0.369	1.02E-12	Mesenchyme 1 (F)	TMEM141
BCAT1	4.66E-17	0.311336165	0.588	0.416	1.12E-12	Mesenchyme 1 (F)	BCAT1
OSTC	5.88E-17	0.279840412	0.815	0.693	1.41E-12	Mesenchyme 1 (F)	OSTC
DDR2	7.40E-17	0.352919821	0.597	0.444	1.78E-12	Mesenchyme 1 (F)	DDR2
YIPF2	7.70E-17	0.310166215	0.446	0.281	1.85E-12	Mesenchyme 1 (F)	YIPF2
MXRA82	8.18E-17	0.274775167	0.794	0.616	1.97E-12	Mesenchyme 1 (F)	MXRA8
AL078639.1	9.67E-17	0.394744696	0.346	0.199	2.33E-12	Mesenchyme 1 (F)	AL078639.1
TOM1	9.85E-17	0.253049885	0.348	0.195	2.37E-12	Mesenchyme 1 (F)	TOM1
TNNT3	1.10E-16	0.41269964	0.265	0.124	2.64E-12	Mesenchyme 1 (F)	TNNT3
FKBP9	1.20E-16	0.287690207	0.51	0.34	2.88E-12	Mesenchyme 1 (F)	FKBP9
SRPX2	1.34E-16	0.260520331	0.474	0.299	3.21E-12	Mesenchyme 1 (F)	SRPX2
ADAMTS2	1.50E-16	0.257642668	0.554	0.372	3.60E-12	Mesenchyme 1 (F)	ADAMTS2
TNFRSF1A	2.21E-16	0.267379351	0.65	0.494	5.31E-12	Mesenchyme 1 (F)	TNFRSF1A
CCS	4.76E-16	0.305335451	0.437	0.284	1.14E-11	Mesenchyme 1 (F)	CCS
PODNL11	5.56E-16	0.272649464	0.46	0.286	1.34E-11	Mesenchyme 1 (F)	PODNL1
TSC22D1	5.95E-16	0.266400029	0.561	0.385	1.43E-11	Mesenchyme 1 (F)	TSC22D1
TMEM591	6.46E-16	0.26259413	0.867	0.794	1.55E-11	Mesenchyme 1 (F)	TMEM59
RRAD	6.79E-16	0.68688127	0.405	0.245	1.63E-11	Mesenchyme 1 (F)	RRAD
PDLIM3	1.13E-15	0.384023167	0.416	0.234	2.72E-11	Mesenchyme 1 (F)	PDLIM3
TMEM98	1.26E-15	0.272547656	0.616	0.447	3.04E-11	Mesenchyme 1 (F)	TMEM98
FAM198B	1.28E-15	0.285334303	0.355	0.208	3.08E-11	Mesenchyme 1 (F)	FAM198B
PTH1R	1.42E-15	0.308269731	0.268	0.135	3.42E-11	Mesenchyme 1 (F)	PTH1R
CCNL1	1.90E-15	0.34417391	0.776	0.651	4.56E-11	Mesenchyme 1 (F)	CCNL1
RHOBTB3	2.93E-15	0.268698498	0.666	0.499	7.04E-11	Mesenchyme 1 (F)	RHOBTB3
GOLGA3	3.29E-15	0.288775486	0.426	0.273	7.91E-11	Mesenchyme 1 (F)	GOLGA3
ZNF292	3.72E-15	0.26200779	0.574	0.414	8.94E-11	Mesenchyme 1 (F)	ZNF292
TSPAN4	1.16E-14	0.270694912	0.767	0.659	2.79E-10	Mesenchyme 1 (F)	TSPAN4
PLIN3	1.32E-14	0.260425279	0.513	0.358	3.18E-10	Mesenchyme 1 (F)	PLIN3
RPL17	1.54E-14	0.451618418	0.426	0.293	3.69E-10	Mesenchyme 1 (F)	RPL17
HSPA1B	1.57E-14	0.41760695	0.606	0.455	3.77E-10	Mesenchyme 1 (F)	HSPA1B
IKBIP	2.20E-14	0.284651916	0.529	0.376	5.29E-10	Mesenchyme 1 (F)	IKBIP
YAP1	2.45E-14	0.271573983	0.535	0.393	5.88E-10	Mesenchyme 1 (F)	YAP1
LMAN1	4.36E-14	0.286806679	0.783	0.676	1.05E-09	Mesenchyme 1 (F)	LMAN1
FLOT1	4.45E-14	0.274118717	0.568	0.414	1.07E-09	Mesenchyme 1 (F)	FLOT1
SH3PXD2A	4.72E-14	0.276243	0.568	0.422	1.13E-09	Mesenchyme 1 (F)	SH3PXD2A
CDIPT	4.85E-14	0.286126913	0.517	0.378	1.17E-09	Mesenchyme 1 (F)	CDIPT
GSTM3	7.92E-14	0.266667003	0.455	0.308	1.90E-09	Mesenchyme 1 (F)	GSTM3
DPT	1.01E-13	0.331396203	0.288	0.157	2.43E-09	Mesenchyme 1 (F)	DPT
MXI1	1.11E-13	0.274188752	0.302	0.166	2.68E-09	Mesenchyme 1 (F)	MXI1
VKORC1	1.16E-13	0.285657804	0.787	0.67	2.79E-09	Mesenchyme 1 (F)	VKORC1
ERRFI1	1.20E-13	0.364413979	0.467	0.323	2.88E-09	Mesenchyme 1 (F)	ERRFI1
SLC2A3	1.22E-13	0.279909003	0.531	0.371	2.92E-09	Mesenchyme 1 (F)	SLC2A3
SIVA1	1.28E-13	0.258734741	0.606	0.478	3.08E-09	Mesenchyme 1 (F)	SIVA1
1-Jun	1.35E-13	0.258384958	0.966	0.95	3.25E-09	Mesenchyme 1 (F)	JUN
HCFC1R1	2.15E-13	0.312954405	0.609	0.469	5.16E-09	Mesenchyme 1 (F)	HCFC1R1
CXXC5	5.32E-13	0.280618255	0.565	0.418	1.28E-08	Mesenchyme 1 (F)	CXXC5
QSOX1	1.27E-12	0.252028284	0.535	0.395	3.04E-08	Mesenchyme 1 (F)	QSOX1
SHMT2	1.41E-12	0.257166514	0.334	0.207	3.38E-08	Mesenchyme 1 (F)	SHMT2
FAM114A1	2.67E-12	0.254627319	0.657	0.536	6.41E-08	Mesenchyme 1 (F)	FAM114A1
MASP1	3.09E-12	0.252708837	0.416	0.278	7.43E-08	Mesenchyme 1 (F)	MASP1
FGF7	3.25E-12	0.34251254	0.49	0.344	7.82E-08	Mesenchyme 1 (F)	FGF7
JTB	4.46E-12	0.262492199	0.703	0.591	1.07E-07	Mesenchyme 1 (F)	JTB
CYB5A	2.34E-11	0.297493167	0.545	0.41	5.63E-07	Mesenchyme 1 (F)	CYB5A
METTL26	1.23E-10	0.261039391	0.556	0.457	2.95E-06	Mesenchyme 1 (F)	METTL26
AC020916.1	1.87E-10	0.292430977	0.421	0.296	4.49E-06	Mesenchyme 1 (F)	AC020916.1
EBPL	3.93E-10	0.2640616	0.439	0.313	9.45E-06	Mesenchyme 1 (F)	EBPL
TUT4	2.47E-09	0.260888214	0.416	0.302	5.95E-05	Mesenchyme 1 (F)	TUT4
MIR22HG	3.16E-09	0.257366989	0.453	0.337	7.60E-05	Mesenchyme 1 (F)	MIR22HG
SETD5	1.52E-08	0.251841043	0.419	0.315	0.000364983	Mesenchyme 1 (F)	SETD5
SPP1	2.85E-08	0.257649585	0.272	0.175	0.000684249	Mesenchyme 1 (F)	SPP1
FAM162A	8.85E-08	0.262094658	0.407	0.309	0.002125973	Mesenchyme 1 (F)	FAM162A
VEGFA	1.13E-06	0.290864548	0.535	0.441	0.027157564	Mesenchyme 1 (F)	VEGFA
GPRC5A	6.32E-06	0.293666344	0.375	0.294	0.151917173	Mesenchyme 1 (F)	GPRC5A
CHI3L21	0.001546075	0.252214108	0.256	0.195	1	Mesenchyme 1 (F)	CHI3L2
NOTCH3	2.74E-112	1.509106461	0.586	0.145	6.58E-108	Mesenchyme 2 (F/M)	NOTCH3
SULF1	6.57E-107	1.051880154	0.336	0.036	1.58E-102	Mesenchyme 2 (F/M)	SULF1
GUCY1A2	1.05E-89	1.044147152	0.408	0.075	2.52E-85	Mesenchyme 2 (F/M)	GUCY1A2
BGN1	2.21E-84	1.122965555	0.692	0.253	5.31E-80	Mesenchyme 2 (F/M)	BGN
ACTG2	2.22E-82	1.918696508	0.489	0.119	5.34E-78	Mesenchyme 2 (F/M)	ACTG2
INHBA	8.53E-69	1.150309648	0.293	0.046	2.05E-64	Mesenchyme 2 (F/M)	INHBA
ACTA21	1.96E-66	1.633341684	0.838	0.488	4.70E-62	Mesenchyme 2 (F/M)	ACTA2
COL4A21	3.71E-63	0.773915604	0.941	0.816	8.92E-59	Mesenchyme 2 (F/M)	COL4A2
COL4A11	6.03E-58	0.801542354	0.931	0.809	1.45E-53	Mesenchyme 2 (F/M)	COL4A1
JAG1	7.11E-58	0.888327294	0.364	0.088	1.71E-53	Mesenchyme 2 (F/M)	JAG1
PDLIM31	1.17E-56	0.924714887	0.579	0.225	2.82E-52	Mesenchyme 2 (F/M)	PDLIM3
COL8A1	5.44E-56	0.780399038	0.255	0.043	1.31E-51	Mesenchyme 2 (F/M)	COL8A1
TAGLN1	1.19E-55	1.231772698	0.866	0.541	2.86E-51	Mesenchyme 2 (F/M)	TAGLN
ZEB21	2.61E-54	0.963720219	0.704	0.36	6.28E-50	Mesenchyme 2 (F/M)	ZEB2
TPPP3	1.22E-53	0.74243426	0.349	0.084	2.94E-49	Mesenchyme 2 (F/M)	TPPP3
ITGB1	1.43E-47	0.696354618	0.941	0.937	3.43E-43	Mesenchyme 2 (F/M)	ITGB1
TNC	1.13E-46	1.150840648	0.34	0.094	2.72E-42	Mesenchyme 2 (F/M)	TNC
MMP11	3.90E-46	1.488041657	0.271	0.059	9.38E-42	Mesenchyme 2 (F/M)	MMP11
COL6A31	7.21E-46	0.748758299	0.863	0.686	1.73E-41	Mesenchyme 2 (F/M)	COL6A3
SPARC1	9.35E-46	0.614747841	0.969	0.878	2.25E-41	Mesenchyme 2 (F/M)	SPARC
MYLK1	1.52E-44	0.982718505	0.542	0.233	3.66E-40	Mesenchyme 2 (F/M)	MYLK
POSTN	3.97E-44	1.861382868	0.34	0.099	9.55E-40	Mesenchyme 2 (F/M)	POSTN
COL6A11	2.25E-43	0.709994843	0.91	0.745	5.42E-39	Mesenchyme 2 (F/M)	COL6A1
ASPN1	2.38E-42	0.890236745	0.361	0.111	5.72E-38	Mesenchyme 2 (F/M)	ASPN
EDIL3	7.20E-40	0.544975393	0.287	0.073	1.73E-35	Mesenchyme 2 (F/M)	EDIL3
COL6A21	3.30E-37	0.574351551	0.935	0.848	7.94E-33	Mesenchyme 2 (F/M)	COL6A2
COL1A21	1.14E-36	0.393155926	0.956	0.746	2.75E-32	Mesenchyme 2 (F/M)	COL1A2
MYH111	1.75E-36	1.008997112	0.336	0.106	4.20E-32	Mesenchyme 2 (F/M)	MYH11
TPM11	4.15E-35	0.710087765	0.888	0.74	9.98E-31	Mesenchyme 2 (F/M)	TPM1
MYL92	5.89E-35	0.823089339	0.922	0.802	1.42E-30	Mesenchyme 2 (F/M)	MYL9
NEXN1	8.13E-34	0.797469953	0.455	0.198	1.95E-29	Mesenchyme 2 (F/M)	NEXN
MCAM	4.48E-33	0.900802343	0.402	0.168	1.08E-28	Mesenchyme 2 (F/M)	MCAM
CCL2	4.75E-33	1.202664308	0.343	0.119	1.14E-28	Mesenchyme 2 (F/M)	CCL2
CALD1	5.94E-33	0.481486903	0.988	0.957	1.43E-28	Mesenchyme 2 (F/M)	CALD1
COL1A11	7.28E-33	0.378180835	0.931	0.724	1.75E-28	Mesenchyme 2 (F/M)	COL1A1
GEM	1.95E-32	0.965571139	0.402	0.17	4.69E-28	Mesenchyme 2 (F/M)	GEM
THBS21	2.94E-32	0.720361334	0.33	0.116	7.06E-28	Mesenchyme 2 (F/M)	THBS2
TPM21	8.05E-32	1.001335487	0.872	0.727	1.94E-27	Mesenchyme 2 (F/M)	TPM2
TINAGL1	3.28E-30	0.747136706	0.411	0.179	7.87E-26	Mesenchyme 2 (F/M)	TINAGL1
TMEM119	5.76E-30	0.439141387	0.255	0.073	1.39E-25	Mesenchyme 2 (F/M)	TMEM119
FN11	8.78E-30	0.553956853	0.972	0.972	2.11E-25	Mesenchyme 2 (F/M)	FN1
CAMK2N1	9.62E-30	0.766864751	0.389	0.167	2.31E-25	Mesenchyme 2 (F/M)	CAMK2N1
FILIP1L1	4.52E-29	0.799585056	0.757	0.581	1.09E-24	Mesenchyme 2 (F/M)	FILIP1L
COL18A1	6.58E-29	0.997119981	0.713	0.58	1.58E-24	Mesenchyme 2 (F/M)	COL18A1
TMEM47	7.79E-29	0.522337363	0.287	0.096	1.87E-24	Mesenchyme 2 (F/M)	TMEM47
PDGFA	2.46E-28	0.580324247	0.402	0.172	5.92E-24	Mesenchyme 2 (F/M)	PDGFA
MT2A	1.56E-27	1.043056948	0.769	0.545	3.76E-23	Mesenchyme 2 (F/M)	MT2A
MGP	3.34E-26	0.929355006	0.897	0.823	8.02E-22	Mesenchyme 2 (F/M)	MGP
PALLD	3.43E-26	0.850579464	0.717	0.57	8.24E-22	Mesenchyme 2 (F/M)	PALLD
COL12A11	2.17E-25	0.655299739	0.364	0.161	5.21E-21	Mesenchyme 2 (F/M)	COL12A1
SYNPO21	1.26E-24	1.035020445	0.483	0.291	3.02E-20	Mesenchyme 2 (F/M)	SYNPO2
SLIT3	3.29E-24	0.773457332	0.38	0.195	7.91E-20	Mesenchyme 2 (F/M)	SLIT3
ITGA1	7.25E-24	0.715507294	0.645	0.467	1.74E-19	Mesenchyme 2 (F/M)	ITGA1
CARMN	9.60E-24	0.632661368	0.293	0.112	2.31E-19	Mesenchyme 2 (F/M)	CARMN
MRGPRF	1.01E-23	0.585915069	0.449	0.235	2.43E-19	Mesenchyme 2 (F/M)	MRGPRF
TPM4	3.43E-23	0.441634045	0.875	0.888	8.25E-19	Mesenchyme 2 (F/M)	TPM4
MT1E	4.66E-22	0.608660026	0.402	0.196	1.12E-17	Mesenchyme 2 (F/M)	MT1E
MYH9	1.02E-21	0.671936188	0.717	0.605	2.45E-17	Mesenchyme 2 (F/M)	MYH9
LPP1	1.43E-21	0.668243281	0.735	0.64	3.45E-17	Mesenchyme 2 (F/M)	LPP
S100A111	3.50E-21	0.431610822	0.879	0.88	8.42E-17	Mesenchyme 2 (F/M)	S100A11
OLFML2B1	3.84E-21	0.696505117	0.358	0.175	9.24E-17	Mesenchyme 2 (F/M)	OLFML2B
NT5DC2	1.91E-20	0.384550602	0.255	0.095	4.60E-16	Mesenchyme 2 (F/M)	NT5DC2
CNN11	1.99E-19	0.603377256	0.439	0.231	4.78E-15	Mesenchyme 2 (F/M)	CNN1
COL5A21	2.49E-19	0.443825665	0.766	0.574	5.99E-15	Mesenchyme 2 (F/M)	COL5A2
C12orf75	4.65E-19	0.73193569	0.47	0.305	1.12E-14	Mesenchyme 2 (F/M)	C12orf75
7-Sep	5.34E-19	0.516530529	0.807	0.761	1.28E-14	Mesenchyme 2 (F/M)	7-Sep
CNN3	8.64E-19	0.483212622	0.717	0.556	2.08E-14	Mesenchyme 2 (F/M)	CNN3
IGFBP71	1.22E-18	0.630586893	0.857	0.766	2.93E-14	Mesenchyme 2 (F/M)	IGFBP7
SDC2	4.45E-18	0.7452829	0.52	0.378	1.07E-13	Mesenchyme 2 (F/M)	SDC2
COL5A3	5.08E-18	0.486612084	0.265	0.112	1.22E-13	Mesenchyme 2 (F/M)	COL5A3
ENAH	1.99E-17	0.58225374	0.467	0.302	4.78E-13	Mesenchyme 2 (F/M)	ENAH
TUBA1B	5.65E-17	0.401280279	0.798	0.76	1.36E-12	Mesenchyme 2 (F/M)	TUBA1B
PRRX11	7.88E-17	0.723855537	0.433	0.282	1.89E-12	Mesenchyme 2 (F/M)	PRRX1
GUCY1A11	1.01E-16	0.358581219	0.352	0.171	2.42E-12	Mesenchyme 2 (F/M)	GUCY1A1
CALM1	2.12E-16	0.441762814	0.804	0.787	5.10E-12	Mesenchyme 2 (F/M)	CALM1
PRELP1	2.75E-16	0.410865024	0.452	0.247	6.61E-12	Mesenchyme 2 (F/M)	PRELP
DSTN1	4.77E-16	0.573123634	0.966	0.953	1.15E-11	Mesenchyme 2 (F/M)	DSTN
WFDC1	4.84E-16	0.371440496	0.33	0.161	1.16E-11	Mesenchyme 2 (F/M)	WFDC1
GAPDH1	1.24E-15	0.26582087	0.925	0.944	2.98E-11	Mesenchyme 2 (F/M)	GAPDH
THY11	4.87E-15	0.528574604	0.732	0.654	1.17E-10	Mesenchyme 2 (F/M)	THY1
PDGFRB	5.07E-15	0.660446542	0.567	0.451	1.22E-10	Mesenchyme 2 (F/M)	PDGFRB
EPS8	8.95E-15	0.612940081	0.576	0.465	2.15E-10	Mesenchyme 2 (F/M)	EPS8
UACA	1.23E-14	0.681061386	0.573	0.455	2.95E-10	Mesenchyme 2 (F/M)	UACA
NDUFA4L21	1.44E-14	0.45526078	0.511	0.3	3.47E-10	Mesenchyme 2 (F/M)	NDUFA4L2
PPP1R14A2	2.25E-14	0.704309723	0.539	0.396	5.41E-10	Mesenchyme 2 (F/M)	PPP1R14A
ANXA5	2.25E-14	0.368571062	0.841	0.879	5.41E-10	Mesenchyme 2 (F/M)	ANXA5
CSRP21	2.92E-14	0.427657974	0.486	0.297	7.02E-10	Mesenchyme 2 (F/M)	CSRP2
PPP1R12B1	3.09E-14	0.524839204	0.268	0.134	7.44E-10	Mesenchyme 2 (F/M)	PPP1R12B
LOXL21	4.86E-14	0.371944058	0.52	0.329	1.17E-09	Mesenchyme 2 (F/M)	LOXL2
COL14A11	4.97E-14	0.302872992	0.679	0.481	1.19E-09	Mesenchyme 2 (F/M)	COL14A1
LMNA1	6.34E-14	0.365182588	0.829	0.798	1.52E-09	Mesenchyme 2 (F/M)	LMNA
CRIP2	9.58E-14	0.328917415	0.474	0.282	2.30E-09	Mesenchyme 2 (F/M)	CRIP2
CHCHD101	9.88E-14	0.572800507	0.414	0.27	2.37E-09	Mesenchyme 2 (F/M)	CHCHD10
ANXA6	1.03E-13	0.568616145	0.502	0.379	2.48E-09	Mesenchyme 2 (F/M)	ANXA6
NR2F2	1.47E-13	0.755161985	0.676	0.624	3.53E-09	Mesenchyme 2 (F/M)	NR2F2
MEF2C	1.52E-13	0.809319334	0.315	0.173	3.64E-09	Mesenchyme 2 (F/M)	MEF2C
LOXL11	1.66E-13	0.302382988	0.445	0.264	3.99E-09	Mesenchyme 2 (F/M)	LOXL1
LRRC321	3.53E-13	0.382035269	0.417	0.254	8.48E-09	Mesenchyme 2 (F/M)	LRRC32
ACTB1	1.96E-12	0.299358318	0.978	0.992	4.72E-08	Mesenchyme 2 (F/M)	ACTB
CAVIN1	2.24E-12	0.493596338	0.741	0.754	5.38E-08	Mesenchyme 2 (F/M)	CAVIN1
PMEPA1	4.47E-12	0.624298972	0.336	0.202	1.07E-07	Mesenchyme 2 (F/M)	PMEPA1
LHFPL6	2.74E-11	0.673330317	0.614	0.537	6.59E-07	Mesenchyme 2 (F/M)	LHFPL6
MYL12A	3.23E-11	0.296576731	0.785	0.807	7.76E-07	Mesenchyme 2 (F/M)	MYL12A
ACTN1	8.70E-11	0.412686513	0.667	0.643	2.09E-06	Mesenchyme 2 (F/M)	ACTN1
VCL1	9.89E-11	0.40173575	0.679	0.613	2.38E-06	Mesenchyme 2 (F/M)	VCL
DLC1	1.78E-10	0.408649586	0.436	0.311	4.27E-06	Mesenchyme 2 (F/M)	DLC1
NRP1	1.97E-10	0.510278527	0.436	0.309	4.73E-06	Mesenchyme 2 (F/M)	NRP1
CAVIN3	3.73E-10	0.476194893	0.598	0.545	8.97E-06	Mesenchyme 2 (F/M)	CAVIN3
FHL1	4.67E-10	0.633027378	0.548	0.473	1.12E-05	Mesenchyme 2 (F/M)	FHL1
CALU	4.98E-10	0.28482484	0.782	0.807	1.20E-05	Mesenchyme 2 (F/M)	CALU
PDLIM71	1.31E-09	0.363355511	0.539	0.419	3.15E-05	Mesenchyme 2 (F/M)	PDLIM7
CSRP11	1.99E-09	0.580297845	0.595	0.528	4.78E-05	Mesenchyme 2 (F/M)	CSRP1
PEAK1	2.20E-09	0.432247609	0.343	0.224	5.29E-05	Mesenchyme 2 (F/M)	PEAK1
B3GNT2	2.47E-09	0.403909892	0.271	0.156	5.93E-05	Mesenchyme 2 (F/M)	B3GNT2
ILK	2.59E-09	0.387323361	0.595	0.538	6.23E-05	Mesenchyme 2 (F/M)	ILK
THBS11	3.33E-09	0.394097276	0.551	0.416	8.01E-05	Mesenchyme 2 (F/M)	THBS1
C11orf963	5.17E-09	0.403469909	0.763	0.643	0.000124352	Mesenchyme 2 (F/M)	C11orf96
JUND1	7.14E-09	0.427165904	0.907	0.901	0.000171577	Mesenchyme 2 (F/M)	JUND
PTMS	8.27E-09	0.27994022	0.804	0.801	0.000198805	Mesenchyme 2 (F/M)	PTMS
ETS1	1.21E-08	0.333868701	0.34	0.212	0.000290729	Mesenchyme 2 (F/M)	ETS1
MYO1B	1.43E-08	0.469702864	0.277	0.172	0.000344646	Mesenchyme 2 (F/M)	MYO1B
STK38L	1.51E-08	0.432919061	0.296	0.188	0.000364052	Mesenchyme 2 (F/M)	STK38L
CTGF	1.66E-08	0.380369589	0.614	0.518	0.00039831	Mesenchyme 2 (F/M)	CTGF
MTHFD2	2.11E-08	0.37235238	0.296	0.187	0.000507593	Mesenchyme 2 (F/M)	MTHFD2
PLS3	3.02E-08	0.451962559	0.461	0.379	0.000725505	Mesenchyme 2 (F/M)	PLS3
ADAMTS21	5.38E-08	0.39319744	0.474	0.385	0.00129224	Mesenchyme 2 (F/M)	ADAMTS2
SH3BGRL1	5.51E-08	0.429861839	0.611	0.57	0.001323998	Mesenchyme 2 (F/M)	SH3BGRL
HES11	7.73E-08	0.406037832	0.636	0.519	0.00185881	Mesenchyme 2 (F/M)	HES1
DNAJB4	1.46E-07	0.337502865	0.38	0.27	0.00350629	Mesenchyme 2 (F/M)	DNAJB4
FLNA1	2.04E-07	0.406827505	0.732	0.766	0.00489436	Mesenchyme 2 (F/M)	FLNA
MAP1B1	2.16E-07	0.387503364	0.648	0.64	0.005189061	Mesenchyme 2 (F/M)	MAP1B
ASAP1	2.21E-07	0.267780046	0.461	0.346	0.005318449	Mesenchyme 2 (F/M)	ASAP1
PXDN	2.35E-07	0.448699507	0.408	0.33	0.0056486	Mesenchyme 2 (F/M)	PXDN
CLEC11A1	2.77E-07	0.334623316	0.383	0.273	0.006656596	Mesenchyme 2 (F/M)	CLEC11A
PHLDA1	2.89E-07	0.418074709	0.34	0.239	0.00695424	Mesenchyme 2 (F/M)	PHLDA1
ADIRF	2.98E-07	0.696450458	0.252	0.159	0.007160632	Mesenchyme 2 (F/M)	ADIRF
TNFRSF12A	3.41E-07	0.377366989	0.458	0.362	0.00820483	Mesenchyme 2 (F/M)	TNFRSF12A
FBLIM1	3.57E-07	0.451381105	0.355	0.271	0.008576157	Mesenchyme 2 (F/M)	FBLIM1
CCDC80	6.43E-07	0.709801827	0.732	0.742	0.015448636	Mesenchyme 2 (F/M)	CCDC80
ITM2C1	1.07E-06	0.28550744	0.399	0.293	0.02573929	Mesenchyme 2 (F/M)	ITM2C
TGFB1I11	1.29E-06	0.315974902	0.592	0.523	0.031116232	Mesenchyme 2 (F/M)	TGFB1I1
MSRB3	1.88E-06	0.369678229	0.43	0.354	0.045228943	Mesenchyme 2 (F/M)	MSRB3
SMC6	1.99E-06	0.373269436	0.262	0.177	0.047822593	Mesenchyme 2 (F/M)	SMC6
EPB41L2	2.01E-06	0.360050562	0.442	0.357	0.048322271	Mesenchyme 2 (F/M)	EPB41L2
HSPA1A1	2.13E-06	0.257763508	0.741	0.71	0.051190159	Mesenchyme 2 (F/M)	HSPA1A
ANGPTL2	2.16E-06	0.479599113	0.389	0.3	0.052012847	Mesenchyme 2 (F/M)	ANGPTL2
ID3	2.74E-06	0.383158643	0.327	0.233	0.065927059	Mesenchyme 2 (F/M)	ID3
DES1	3.02E-06	0.492438866	0.374	0.283	0.072535449	Mesenchyme 2 (F/M)	DES
IER31	3.56E-06	0.33755486	0.598	0.497	0.085567557	Mesenchyme 2 (F/M)	IER3
NREP1	4.85E-06	0.281029795	0.33	0.23	0.116569797	Mesenchyme 2 (F/M)	NREP
KRT18	9.40E-06	0.421836926	0.542	0.48	0.226004659	Mesenchyme 2 (F/M)	KRT18
TUBA1A2	1.13E-05	0.35956621	0.735	0.725	0.271561471	Mesenchyme 2 (F/M)	TUBA1A
CPQ	1.50E-05	0.448860481	0.517	0.488	0.361050903	Mesenchyme 2 (F/M)	CPQ
SERPINH11	1.54E-05	0.259499271	0.698	0.715	0.370033518	Mesenchyme 2 (F/M)	SERPINH1
VASP	1.58E-05	0.322739696	0.299	0.227	0.379488315	Mesenchyme 2 (F/M)	VASP
PELO	1.59E-05	0.342028531	0.34	0.256	0.382370716	Mesenchyme 2 (F/M)	PELO
PPIC1	1.62E-05	0.272842955	0.62	0.631	0.388558416	Mesenchyme 2 (F/M)	PPIC
SLC25A5	1.86E-05	0.406928028	0.445	0.386	0.44776681	Mesenchyme 2 (F/M)	SLC25A5
RGS10	2.74E-05	0.318128156	0.29	0.207	0.659575423	Mesenchyme 2 (F/M)	RGS10
ARHGAP1	3.64E-05	0.347249533	0.312	0.24	0.873915124	Mesenchyme 2 (F/M)	ARHGAP1
H2AFJ1	5.39E-05	0.401157202	0.62	0.595	1	Mesenchyme 2 (F/M)	H2AFJ
ATP5ME	5.92E-05	0.265769405	0.794	0.819	1	Mesenchyme 2 (F/M)	ATP5ME
LASP1	7.93E-05	0.356092902	0.442	0.389	1	Mesenchyme 2 (F/M)	LASP1
YWHAH	9.70E-05	0.312245037	0.442	0.383	1	Mesenchyme 2 (F/M)	YWHAH
DAP	0.000116584	0.31384441	0.439	0.394	1	Mesenchyme 2 (F/M)	DAP
MGST3	0.000150207	0.259759148	0.688	0.708	1	Mesenchyme 2 (F/M)	MGST3
FOXP1	0.000204991	0.267650478	0.414	0.351	1	Mesenchyme 2 (F/M)	FOXP1
CYB5R3	0.000381553	0.268055487	0.67	0.703	1	Mesenchyme 2 (F/M)	CYB5R3
GAS6	0.00039451	0.351211322	0.368	0.313	1	Mesenchyme 2 (F/M)	GAS6
ATF31	0.000476994	0.272477633	0.664	0.617	1	Mesenchyme 2 (F/M)	ATF3
AEBP11	0.000546982	0.335809426	0.679	0.712	1	Mesenchyme 2 (F/M)	AEBP1
AC020916.11	0.000749413	0.288270381	0.361	0.305	1	Mesenchyme 2 (F/M)	AC020916.1
PPP1R12A1	0.000789907	0.346485163	0.526	0.501	1	Mesenchyme 2 (F/M)	PPP1R12A
MPRIP	0.000804277	0.354128149	0.349	0.302	1	Mesenchyme 2 (F/M)	MPRIP
EIF4E2	0.000819842	0.25795846	0.408	0.365	1	Mesenchyme 2 (F/M)	EIF4E2
SERPINE1	0.000879158	0.368708386	0.583	0.591	1	Mesenchyme 2 (F/M)	SERPINE1
PDLIM5	0.000912949	0.274989901	0.458	0.415	1	Mesenchyme 2 (F/M)	PDLIM5
ERRFI11	0.000969921	0.379354056	0.386	0.335	1	Mesenchyme 2 (F/M)	ERRFI1
TCIM1	0.001121251	0.409460186	0.296	0.237	1	Mesenchyme 2 (F/M)	TCIM
MAP4	0.001124202	0.271314946	0.617	0.634	1	Mesenchyme 2 (F/M)	MAP4
MFGE82	0.001318862	0.343262655	0.66	0.638	1	Mesenchyme 2 (F/M)	MFGE8
GNG12	0.001834109	0.326506546	0.436	0.403	1	Mesenchyme 2 (F/M)	GNG12
FLT1	0.001857408	0.256992349	0.442	0.366	1	Mesenchyme 2 (F/M)	FLT1
LMOD11	0.001952852	0.307102331	0.442	0.417	1	Mesenchyme 2 (F/M)	LMOD1
MAGED2	0.002390807	0.264970096	0.576	0.599	1	Mesenchyme 2 (F/M)	MAGED2
TNS1	0.002775103	0.324413498	0.449	0.426	1	Mesenchyme 2 (F/M)	TNS1
ROCK1	0.003160984	0.304494974	0.498	0.501	1	Mesenchyme 2 (F/M)	ROCK1
LTBP21	0.003251233	0.25716195	0.305	0.249	1	Mesenchyme 2 (F/M)	LTBP2
ACTN4	0.003330837	0.305650562	0.614	0.661	1	Mesenchyme 2 (F/M)	ACTN4
NPTN	0.003860955	0.27124025	0.383	0.346	1	Mesenchyme 2 (F/M)	NPTN
PTK2	0.004759388	0.381261706	0.327	0.291	1	Mesenchyme 2 (F/M)	PTK2
APOE1	0.005294847	0.670652113	0.629	0.607	1	Mesenchyme 2 (F/M)	APOE
ANKRD10	0.005819149	0.368009193	0.252	0.209	1	Mesenchyme 2 (F/M)	ANKRD10
ADI1	0.005915971	0.313528053	0.48	0.467	1	Mesenchyme 2 (F/M)	ADI1
COL11A11	6.09E-232	1.488171384	0.88	0.202	1.46E-227	Mesenchyme 3 (F)	COL11A1
NDUFA4L22	3.92E-225	1.324392514	0.909	0.227	9.43E-221	Mesenchyme 3 (F)	NDUFA4L2
DLK11	2.36E-224	1.348905728	0.979	0.251	5.68E-220	Mesenchyme 3 (F)	DLK1
EGFL61	9.16E-219	1.296694387	0.969	0.247	2.20E-214	Mesenchyme 3 (F)	EGFL6
GPC31	1.36E-199	1.060408697	0.961	0.26	3.28E-195	Mesenchyme 3 (F)	GPC3
COL1A12	1.43E-196	1.568450604	1	0.702	3.43E-192	Mesenchyme 3 (F)	COL1A1
COL1A22	1.47E-195	1.540561194	0.998	0.728	3.52E-191	Mesenchyme 3 (F)	COL1A2
SERPINE21	1.30E-190	1.332547986	0.979	0.406	3.13E-186	Mesenchyme 3 (F)	SERPINE2
COL5A11	1.16E-188	1.376737061	0.965	0.513	2.80E-184	Mesenchyme 3 (F)	COL5A1
LOXL22	3.80E-188	1.07732319	0.878	0.263	9.14E-184	Mesenchyme 3 (F)	LOXL2
COL3A11	4.87E-188	1.472633245	0.998	0.654	1.17E-183	Mesenchyme 3 (F)	COL3A1
TGFBI1	1.03E-186	1.220339273	0.969	0.389	2.49E-182	Mesenchyme 3 (F)	TGFBI
RPS4Y11	6.03E-182	0.904405322	0.843	0.212	1.45E-177	Mesenchyme 3 (F)	RPS4Y1
MATN21	4.99E-181	1.108603911	0.924	0.305	1.20E-176	Mesenchyme 3 (F)	MATN2
ATP1B11	1.02E-180	0.94967874	0.847	0.214	2.45E-176	Mesenchyme 3 (F)	ATP1B1
COL5A22	1.10E-180	1.245603148	0.969	0.532	2.65E-176	Mesenchyme 3 (F)	COL5A2
ELOVL21	2.49E-179	0.787988243	0.8	0.182	5.99E-175	Mesenchyme 3 (F)	ELOVL2
MEST1	1.48E-178	1.155275849	0.952	0.377	3.56E-174	Mesenchyme 3 (F)	MEST
SPARC2	7.03E-176	1.309345503	0.99	0.87	1.69E-171	Mesenchyme 3 (F)	SPARC
HAPLN11	8.23E-172	1.146877879	0.773	0.183	1.98E-167	Mesenchyme 3 (F)	HAPLN1
CTHRC11	3.67E-168	1.029160078	0.952	0.352	8.81E-164	Mesenchyme 3 (F)	CTHRC1
PLOD21	3.81E-168	1.135266668	0.903	0.365	9.15E-164	Mesenchyme 3 (F)	PLOD2
STXBP61	4.55E-167	0.837923265	0.806	0.211	1.09E-162	Mesenchyme 3 (F)	STXBP6
COL6A12	1.82E-165	1.120241665	0.996	0.723	4.38E-161	Mesenchyme 3 (F)	COL6A1
MMP23B1	1.52E-164	0.853645401	0.862	0.262	3.65E-160	Mesenchyme 3 (F)	MMP23B
LOX1	2.13E-161	1.20098939	0.884	0.384	5.12E-157	Mesenchyme 3 (F)	LOX
CREB3L11	1.05E-157	0.947484939	0.874	0.343	2.52E-153	Mesenchyme 3 (F)	CREB3L1
IGF2BP21	4.16E-153	0.7058048	0.75	0.189	9.99E-149	Mesenchyme 3 (F)	IGF2BP2
MME1	1.48E-151	1.022369877	0.911	0.425	3.55E-147	Mesenchyme 3 (F)	MME
MEG81	7.41E-151	0.872589272	0.82	0.274	1.78E-146	Mesenchyme 3 (F)	MEG8
EGLN31	9.22E-151	0.900553182	0.798	0.254	2.21E-146	Mesenchyme 3 (F)	EGLN3
COL15A11	3.45E-150	1.030673439	0.936	0.483	8.30E-146	Mesenchyme 3 (F)	COL15A1
FKBP101	5.83E-149	1.043320255	0.897	0.462	1.40E-144	Mesenchyme 3 (F)	FKBP10
COL16A11	1.07E-146	0.768314205	0.725	0.188	2.57E-142	Mesenchyme 3 (F)	COL16A1
CRABP21	1.86E-145	0.754585019	0.665	0.156	4.46E-141	Mesenchyme 3 (F)	CRABP2
COL6A22	1.86E-145	0.912211506	0.998	0.834	4.47E-141	Mesenchyme 3 (F)	COL6A2
SERPINH12	1.99E-143	0.896178445	0.963	0.675	4.78E-139	Mesenchyme 3 (F)	SERPINH1
PITX21	1.47E-139	0.658237808	0.719	0.178	3.53E-135	Mesenchyme 3 (F)	PITX2
PRELP2	7.15E-139	0.791035507	0.721	0.194	1.72E-134	Mesenchyme 3 (F)	PRELP
MEG31	2.35E-137	0.956587509	0.988	0.695	5.64E-133	Mesenchyme 3 (F)	MEG3
P4HA11	3.03E-135	0.928995814	0.901	0.458	7.29E-131	Mesenchyme 3 (F)	P4HA1
ITGA111	1.25E-134	0.624089204	0.583	0.128	3.01E-130	Mesenchyme 3 (F)	ITGA11
COL4A12	2.21E-134	0.91145784	0.986	0.793	5.32E-130	Mesenchyme 3 (F)	COL4A1
S100A101	7.76E-134	0.9620679	0.981	0.53	1.87E-129	Mesenchyme 3 (F)	S100A10
PLOD11	1.30E-133	0.854807283	0.8	0.308	3.13E-129	Mesenchyme 3 (F)	PLOD1
SLC16A31	2.28E-133	0.751928774	0.75	0.24	5.48E-129	Mesenchyme 3 (F)	SLC16A3
STC21	6.20E-133	0.896459054	0.616	0.15	1.49E-128	Mesenchyme 3 (F)	STC2
HGF	1.19E-130	0.709964726	0.76	0.219	2.87E-126	Mesenchyme 3 (F)	HGF
PDPN1	3.57E-129	0.914704166	0.924	0.534	8.57E-125	Mesenchyme 3 (F)	PDPN
LOXL12	2.25E-125	0.739356054	0.717	0.212	5.40E-121	Mesenchyme 3 (F)	LOXL1
FN12	2.79E-125	0.714618575	0.998	0.968	6.70E-121	Mesenchyme 3 (F)	FN1
P4HB1	4.58E-125	0.771482868	0.961	0.831	1.10E-120	Mesenchyme 3 (F)	P4HB
CERCAM1	1.59E-124	0.838293756	0.855	0.399	3.83E-120	Mesenchyme 3 (F)	CERCAM
BST21	1.74E-124	0.873938763	0.938	0.465	4.19E-120	Mesenchyme 3 (F)	BST2
TENT5A1	9.09E-123	0.863751717	0.785	0.298	2.19E-118	Mesenchyme 3 (F)	TENT5A
SLIT21	2.68E-122	0.62741012	0.626	0.155	6.43E-118	Mesenchyme 3 (F)	SLIT2
COL14A12	5.84E-122	0.796350944	0.924	0.432	1.40E-117	Mesenchyme 3 (F)	COL14A1
COL4A22	2.89E-121	0.788704575	0.979	0.802	6.94E-117	Mesenchyme 3 (F)	COL4A2
LAMA21	1.28E-120	0.808229745	0.843	0.36	3.08E-116	Mesenchyme 3 (F)	LAMA2
MXRA51	1.57E-120	0.71039971	0.554	0.13	3.77E-116	Mesenchyme 3 (F)	MXRA5
MRC21	6.47E-118	0.786441755	0.791	0.312	1.56E-113	Mesenchyme 3 (F)	MRC2
PCDH101	1.42E-115	0.535521152	0.543	0.121	3.40E-111	Mesenchyme 3 (F)	PCDH10
CXCL141	1.42E-114	1.128862709	0.845	0.41	3.40E-110	Mesenchyme 3 (F)	CXCL14
LAMC31	4.30E-113	0.71533003	0.75	0.281	1.03E-108	Mesenchyme 3 (F)	LAMC3
RCN31	2.56E-110	0.820320007	0.82	0.398	6.15E-106	Mesenchyme 3 (F)	RCN3
MFAP21	7.23E-110	0.617579363	0.671	0.203	1.74E-105	Mesenchyme 3 (F)	MFAP2
KDELR31	1.21E-109	0.635833184	0.663	0.216	2.90E-105	Mesenchyme 3 (F)	KDELR3
LOXL41	8.38E-108	0.51926341	0.517	0.122	2.01E-103	Mesenchyme 3 (F)	LOXL4
FMOD1	2.19E-107	0.935055574	0.758	0.318	5.28E-103	Mesenchyme 3 (F)	FMOD
ALCAM1	4.06E-106	0.598599191	0.599	0.171	9.75E-102	Mesenchyme 3 (F)	ALCAM
PTGER21	7.05E-105	0.499268992	0.494	0.112	1.69E-100	Mesenchyme 3 (F)	PTGER2
FSTL11	1.31E-104	0.71277887	0.957	0.776	3.15E-100	Mesenchyme 3 (F)	FSTL1
DES2	1.81E-104	0.851037646	0.68	0.231	4.36E-100	Mesenchyme 3 (F)	DES
IER32	7.16E-103	1.004489695	0.888	0.446	1.72E-98	Mesenchyme 3 (F)	IER3
CSRP22	3.47E-102	0.629850105	0.721	0.25	8.33E-98	Mesenchyme 3 (F)	CSRP2
PCSK61	2.85E-101	0.618632506	0.558	0.153	6.85E-97	Mesenchyme 3 (F)	PCSK6
SQLE1	3.26E-101	0.638565424	0.624	0.2	7.83E-97	Mesenchyme 3 (F)	SQLE
PLD31	6.74E-101	0.712072288	0.903	0.578	1.62E-96	Mesenchyme 3 (F)	PLD3
DPP41	1.30E-98	0.556015201	0.645	0.204	3.13E-94	Mesenchyme 3 (F)	DPP4
COL6A32	5.85E-98	0.831756449	0.936	0.664	1.41E-93	Mesenchyme 3 (F)	COL6A3
P4HA21	5.60E-95	0.739845465	0.748	0.362	1.35E-90	Mesenchyme 3 (F)	P4HA2
VTN1	1.71E-94	0.650966416	0.723	0.284	4.12E-90	Mesenchyme 3 (F)	VTN
P3H11	2.83E-94	0.569216711	0.667	0.243	6.80E-90	Mesenchyme 3 (F)	P3H1
ADAM121	3.82E-94	0.59101157	0.684	0.237	9.18E-90	Mesenchyme 3 (F)	ADAM12
ENO11	4.12E-94	0.732879339	0.926	0.737	9.89E-90	Mesenchyme 3 (F)	ENO1
FSCN11	9.67E-94	0.602239905	0.762	0.312	2.32E-89	Mesenchyme 3 (F)	FSCN1
PDLIM32	1.87E-93	0.665042591	0.614	0.199	4.50E-89	Mesenchyme 3 (F)	PDLIM3
C1QL11	6.10E-93	0.447176948	0.405	0.084	1.47E-88	Mesenchyme 3 (F)	C1QL1
FTL1	7.80E-93	0.625867653	0.998	0.975	1.88E-88	Mesenchyme 3 (F)	FTL
KCNE41	3.47E-92	0.632932045	0.566	0.168	8.33E-88	Mesenchyme 3 (F)	KCNE4
CAPS1	3.64E-92	0.569029695	0.531	0.149	8.74E-88	Mesenchyme 3 (F)	CAPS
RSPO21	9.51E-92	0.42871551	0.475	0.113	2.29E-87	Mesenchyme 3 (F)	RSPO2
BIRC71	3.19E-91	0.447732615	0.432	0.099	7.67E-87	Mesenchyme 3 (F)	BIRC7
IGFBP31	7.27E-91	0.776232176	0.965	0.711	1.75E-86	Mesenchyme 3 (F)	IGFBP3
CCND21	2.26E-89	0.715695996	0.845	0.458	5.44E-85	Mesenchyme 3 (F)	CCND2
COL21A11	4.17E-89	0.539556758	0.597	0.192	1.00E-84	Mesenchyme 3 (F)	COL21A1
CA121	5.31E-89	0.513319618	0.5	0.135	1.28E-84	Mesenchyme 3 (F)	CA12
IGF2.11	8.32E-89	0.636021552	0.715	0.281	2.00E-84	Mesenchyme 3 (F)	IGF2.1
C3orf581	1.31E-88	0.64106009	0.692	0.279	3.15E-84	Mesenchyme 3 (F)	C3orf58
GDF61	1.56E-88	0.479879538	0.403	0.086	3.76E-84	Mesenchyme 3 (F)	GDF6
HMOX11	2.38E-88	0.695662407	0.57	0.184	5.72E-84	Mesenchyme 3 (F)	HMOX1
KDELR21	4.88E-88	0.618816105	0.909	0.69	1.17E-83	Mesenchyme 3 (F)	KDELR2
DSG21	1.73E-85	0.44292272	0.488	0.132	4.16E-81	Mesenchyme 3 (F)	DSG2
PHLDA31	4.16E-85	0.517807571	0.566	0.183	1.00E-80	Mesenchyme 3 (F)	PHLDA3
PITX11	1.78E-84	0.458208712	0.436	0.107	4.28E-80	Mesenchyme 3 (F)	PITX1
COMP	2.59E-84	0.816578331	0.32	0.056	6.23E-80	Mesenchyme 3 (F)	COMP
GPX81	3.56E-84	0.627819348	0.785	0.403	8.56E-80	Mesenchyme 3 (F)	GPX8
HSD17B21	4.90E-84	0.490419743	0.64	0.211	1.18E-79	Mesenchyme 3 (F)	HSD17B2
F101	4.95E-84	0.558317727	0.667	0.269	1.19E-79	Mesenchyme 3 (F)	F10
PYCR11	7.28E-84	0.489539048	0.477	0.133	1.75E-79	Mesenchyme 3 (F)	PYCR1
DDX3Y1	2.04E-83	0.401838155	0.388	0.085	4.90E-79	Mesenchyme 3 (F)	DDX3Y
CSPG41	2.39E-83	0.427020428	0.422	0.102	5.75E-79	Mesenchyme 3 (F)	CSPG4
NKAIN41	5.84E-83	0.377890908	0.345	0.067	1.40E-78	Mesenchyme 3 (F)	NKAIN4
P3H41	2.04E-82	0.593717876	0.614	0.235	4.89E-78	Mesenchyme 3 (F)	P3H4
CKAP41	7.94E-82	0.68556494	0.841	0.478	1.91E-77	Mesenchyme 3 (F)	CKAP4
PLTP1	8.48E-82	0.658690665	0.773	0.37	2.04E-77	Mesenchyme 3 (F)	PLTP
PRDX41	1.27E-81	0.655970512	0.862	0.632	3.06E-77	Mesenchyme 3 (F)	PRDX4
COL9A31	1.74E-81	0.437154624	0.368	0.078	4.19E-77	Mesenchyme 3 (F)	COL9A3
ADGRA21	1.10E-80	0.51062536	0.638	0.239	2.64E-76	Mesenchyme 3 (F)	ADGRA2
LOXL31	9.71E-80	0.507893084	0.488	0.146	2.33E-75	Mesenchyme 3 (F)	LOXL3
NREP2	1.20E-79	0.486029406	0.564	0.189	2.89E-75	Mesenchyme 3 (F)	NREP
FIBIN1	1.25E-79	0.480901852	0.397	0.094	3.00E-75	Mesenchyme 3 (F)	FIBIN
TIMP11	3.71E-79	0.637094944	0.983	0.904	8.92E-75	Mesenchyme 3 (F)	TIMP1
AQP1	5.84E-77	0.39010308	0.399	0.096	1.40E-72	Mesenchyme 3 (F)	AQP1
SERPINF12	7.72E-77	0.60471261	0.963	0.672	1.86E-72	Mesenchyme 3 (F)	SERPINF1
RARRES21	2.27E-76	0.662959086	0.824	0.425	5.46E-72	Mesenchyme 3 (F)	RARRES2
LDHA1	4.32E-76	0.574323456	0.948	0.787	1.04E-71	Mesenchyme 3 (F)	LDHA
RRBP11	6.89E-76	0.535981192	0.936	0.738	1.66E-71	Mesenchyme 3 (F)	RRBP1
TENM31	7.86E-76	0.390663573	0.376	0.088	1.89E-71	Mesenchyme 3 (F)	TENM3
SCD1	1.37E-75	0.440532525	0.455	0.127	3.30E-71	Mesenchyme 3 (F)	SCD
TCEA31	1.68E-75	0.452122476	0.469	0.138	4.04E-71	Mesenchyme 3 (F)	TCEA3
PEG31	3.56E-75	0.804631722	0.597	0.233	8.57E-71	Mesenchyme 3 (F)	PEG3
SMIM31	5.10E-75	0.51199138	0.605	0.226	1.23E-70	Mesenchyme 3 (F)	SMIM3
WNT2	9.86E-75	0.506047002	0.647	0.251	2.37E-70	Mesenchyme 3 (F)	WNT2
PNCK1	1.58E-74	0.467084879	0.405	0.107	3.79E-70	Mesenchyme 3 (F)	PNCK
IGDCC41	3.22E-73	0.385686867	0.355	0.081	7.73E-69	Mesenchyme 3 (F)	IGDCC4
WFDC11	3.66E-73	0.413616286	0.459	0.131	8.80E-69	Mesenchyme 3 (F)	WFDC1
S100A112	4.67E-73	0.532069812	0.955	0.868	1.12E-68	Mesenchyme 3 (F)	S100A11
IGF2BP11	7.98E-73	0.368754848	0.382	0.093	1.92E-68	Mesenchyme 3 (F)	IGF2BP1
RUNX11	1.24E-71	0.507744825	0.517	0.181	2.98E-67	Mesenchyme 3 (F)	RUNX1
ITGBL11	5.00E-71	0.507041388	0.463	0.139	1.20E-66	Mesenchyme 3 (F)	ITGBL1
PTK71	1.36E-70	0.528426458	0.729	0.369	3.27E-66	Mesenchyme 3 (F)	PTK7
P3H31	2.61E-70	0.537268334	0.574	0.232	6.27E-66	Mesenchyme 3 (F)	P3H3
TPI11	6.55E-70	0.553599334	0.919	0.756	1.57E-65	Mesenchyme 3 (F)	TPI1
KRT191	1.17E-69	0.64999685	0.746	0.416	2.81E-65	Mesenchyme 3 (F)	KRT19
PLP21	1.26E-69	0.557056397	0.758	0.41	3.02E-65	Mesenchyme 3 (F)	PLP2
PGK11	1.34E-69	0.641826993	0.855	0.65	3.21E-65	Mesenchyme 3 (F)	PGK1
COL8A21	1.74E-69	0.386083612	0.384	0.097	4.18E-65	Mesenchyme 3 (F)	COL8A2
F5	9.12E-69	0.408955388	0.322	0.07	2.19E-64	Mesenchyme 3 (F)	F5
BGN2	2.22E-68	0.404009376	0.634	0.236	5.34E-64	Mesenchyme 3 (F)	BGN
TNNT31	4.70E-68	0.764244517	0.382	0.103	1.13E-63	Mesenchyme 3 (F)	TNNT3
BNIP31	6.60E-68	0.624510933	0.793	0.469	1.59E-63	Mesenchyme 3 (F)	BNIP3
FBLN21	7.96E-68	0.547064029	0.917	0.617	1.91E-63	Mesenchyme 3 (F)	FBLN2
HES12	8.22E-68	0.726141176	0.835	0.481	1.97E-63	Mesenchyme 3 (F)	HES1
AGPAT41	1.26E-66	0.444913284	0.496	0.174	3.02E-62	Mesenchyme 3 (F)	AGPAT4
FGFR11	2.97E-66	0.544068902	0.734	0.391	7.13E-62	Mesenchyme 3 (F)	FGFR1
HSPA21	5.67E-66	0.522018142	0.808	0.453	1.36E-61	Mesenchyme 3 (F)	HSPA2
PDE4DIP1	6.20E-66	0.473233797	0.576	0.224	1.49E-61	Mesenchyme 3 (F)	PDE4DIP
GAPDH2	7.02E-66	0.474361627	0.965	0.939	1.69E-61	Mesenchyme 3 (F)	GAPDH
KCNQ1OT11	1.41E-65	0.71777801	0.911	0.634	3.39E-61	Mesenchyme 3 (F)	KCNQ1OT1
ERO1A1	5.34E-65	0.576255712	0.678	0.347	1.28E-60	Mesenchyme 3 (F)	ERO1A
[truncated: 2,940 more rows]
