# Supplementary material for: Regionally distinct trophoblast regulate barrier function and invasion in the human placenta
Source: eLife. 2022 Jul 7;11:e78829. doi: 10.7554/eLife.78829 (PMC9323019; doi:10.7554/eLife.78829)
Supplement: Figure 2—source data 1. [file elife-78829-fig2-data1.csv]

	p_val	avg_logFC	pct.1	pct.2	p_val_adj	cluster	gene
PEG10	0	1.78203905402786	0.98	0.543	0	CTB 1	PEG10
PAGE4	0	1.680812381002	0.957	0.47	0	CTB 1	PAGE4
LDHB	0	1.43713554042021	0.842	0.301	0	CTB 1	LDHB
SMAGP	0	1.37419624638146	0.778	0.287	0	CTB 1	SMAGP
ISYNA1	0	1.30208543062484	0.847	0.39	0	CTB 1	ISYNA1
EFEMP1	0	1.29374292509079	0.871	0.472	0	CTB 1	EFEMP1
WLS	0	1.27260443803315	0.692	0.203	0	CTB 1	WLS
SERPINF1	0	1.24567034937367	0.679	0.155	0	CTB 1	SERPINF1
DUSP9	0	1.22477174600511	0.815	0.335	0	CTB 1	DUSP9
HSD17B1	0	1.19174137164485	0.718	0.234	0	CTB 1	HSD17B1
SPINT1	0	1.0989273417352	0.906	0.565	0	CTB 1	SPINT1
NFE2L3	0	1.08810082723583	0.702	0.274	0	CTB 1	NFE2L3
C15orf48	0	1.08750661587239	0.462	0.145	0	CTB 1	C15orf48
F5	0	1.08636439380795	0.68	0.202	0	CTB 1	F5
COLEC12	0	1.07710543700014	0.575	0.128	0	CTB 1	COLEC12
MEST	0	1.06423552932284	0.696	0.268	0	CTB 1	MEST
ACSS1	0	1.04107397110094	0.575	0.125	0	CTB 1	ACSS1
MLLT1	0	1.01882195949363	0.722	0.335	0	CTB 1	MLLT1
PNP	0	1.01310782729176	0.635	0.266	0	CTB 1	PNP
CD24	0	1.00850574939898	0.837	0.411	0	CTB 1	CD24
SLC40A1	0	0.98285608136528	0.756	0.266	0	CTB 1	SLC40A1
PKIB	0	0.977982149858728	0.71	0.308	0	CTB 1	PKIB
SLC13A4	0	0.975036918566979	0.535	0.096	0	CTB 1	SLC13A4
NRP2	0	0.962449188115095	0.495	0.095	0	CTB 1	NRP2
GALNT11	0	0.954833897619969	0.518	0.191	0	CTB 1	GALNT11
OLR1	0	0.953704370931628	0.738	0.38	0	CTB 1	OLR1
CYSTM1	0	0.952344895324036	0.505	0.116	0	CTB 1	CYSTM1
SLC43A2	0	0.949736031056804	0.625	0.211	0	CTB 1	SLC43A2
MPP1	0	0.943287936829992	0.568	0.172	0	CTB 1	MPP1
BTG3	0	0.940623424198635	0.707	0.272	0	CTB 1	BTG3
DNMT1	0	0.923758924792336	0.807	0.537	0	CTB 1	DNMT1
SLC22A11	0	0.917926788447996	0.615	0.183	0	CTB 1	SLC22A11
FAM3B	0	0.907554390894082	0.449	0.09	0	CTB 1	FAM3B
PARP1	0	0.901185803260539	0.662	0.344	0	CTB 1	PARP1
SLC27A2	0	0.900357608365223	0.44	0.064	0	CTB 1	SLC27A2
TCAF1	0	0.894121846874897	0.715	0.394	0	CTB 1	TCAF1
ALDH7A1	0	0.887907805715703	0.69	0.36	0	CTB 1	ALDH7A1
MBNL3	0	0.886033803145016	0.724	0.367	0	CTB 1	MBNL3
MORC4	0	0.88175688047259	0.871	0.653	0	CTB 1	MORC4
ADIRF	0	0.879999960989512	0.481	0.121	0	CTB 1	ADIRF
CTSC	0	0.874661716631511	0.618	0.336	0	CTB 1	CTSC
BCAM	0	0.868090387952816	0.539	0.18	0	CTB 1	BCAM
APLP2	0	0.849589648730118	0.896	0.685	0	CTB 1	APLP2
HMGA1	0	0.840880789484212	0.632	0.337	0	CTB 1	HMGA1
TFRC	0	0.839484443936025	0.734	0.386	0	CTB 1	TFRC
FXYD3	0	0.832376444595183	0.704	0.418	0	CTB 1	FXYD3
GGH	0	0.830151585128198	0.5	0.191	0	CTB 1	GGH
BEX3	0	0.827680584897949	0.946	0.808	0	CTB 1	BEX3
DBI	0	0.820082784678533	0.707	0.508	0	CTB 1	DBI
CSF3R	0	0.810625828691945	0.742	0.373	0	CTB 1	CSF3R
CRYBG1	0	0.807958635354575	0.573	0.218	0	CTB 1	CRYBG1
MT-CO3	0	0.781362021097388	0.993	0.994	0	CTB 1	MT-CO3
MGST3	0	0.779524838220453	0.951	0.891	0	CTB 1	MGST3
FBN2	0	0.774146091806191	0.783	0.558	0	CTB 1	FBN2
CCND1	0	0.771149299677291	0.317	0.05	0	CTB 1	CCND1
TCEAL9	0	0.770433367437523	0.955	0.896	0	CTB 1	TCEAL9
GABARAPL1	0	0.767849662042997	0.724	0.528	0	CTB 1	GABARAPL1
SLC26A2	0	0.760497856299752	0.566	0.199	0	CTB 1	SLC26A2
RBBP7	0	0.757181008513505	0.691	0.471	0	CTB 1	RBBP7
VGLL1	0	0.7535769850143	0.84	0.704	0	CTB 1	VGLL1
L1TD1	0	0.753428035824076	0.621	0.403	0	CTB 1	L1TD1
ADGRG1	0	0.752244267084962	0.644	0.352	0	CTB 1	ADGRG1
SLC25A5	0	0.737009967953053	0.767	0.58	0	CTB 1	SLC25A5
SVEP1	0	0.736994822720257	0.442	0.104	0	CTB 1	SVEP1
ITGB5	0	0.728447960115101	0.435	0.15	0	CTB 1	ITGB5
HSPD1	0	0.722214552693257	0.813	0.68	0	CTB 1	HSPD1
FAM89A	0	0.720867322666954	0.703	0.465	0	CTB 1	FAM89A
SELENOP	0	0.71929175073005	0.374	0.085	0	CTB 1	SELENOP
IDH1	0	0.716268863612762	0.598	0.392	0	CTB 1	IDH1
TINAGL1	0	0.715292855854525	0.93	0.652	0	CTB 1	TINAGL1
ECI2	0	0.714646582709991	0.464	0.202	0	CTB 1	ECI2
SLC6A4	0	0.709589805020992	0.442	0.173	0	CTB 1	SLC6A4
ASS1	0	0.706693896705762	0.381	0.111	0	CTB 1	ASS1
BMP7	0	0.706451099401628	0.518	0.237	0	CTB 1	BMP7
CASP4	0	0.703783828481371	0.624	0.406	0	CTB 1	CASP4
VSIR	0	0.702730924824035	0.483	0.236	0	CTB 1	VSIR
PSMC1	0	0.697314408037445	0.738	0.616	0	CTB 1	PSMC1
ECHS1	0	0.693200199412766	0.652	0.504	0	CTB 1	ECHS1
NMT1	0	0.686308844652921	0.808	0.718	0	CTB 1	NMT1
MAP7D2	0	0.684206855427553	0.337	0.064	0	CTB 1	MAP7D2
TKT	0	0.683445992787415	0.702	0.491	0	CTB 1	TKT
SOD1	0	0.677554904965225	0.874	0.789	0	CTB 1	SOD1
GSDME	0	0.676140937733631	0.452	0.233	0	CTB 1	GSDME
SMS	0	0.671729754943795	0.805	0.678	0	CTB 1	SMS
TFDP2	0	0.670400321252018	0.691	0.487	0	CTB 1	TFDP2
PEG3	0	0.662008551006707	0.891	0.638	0	CTB 1	PEG3
PHLDA2	0	0.661375311410525	0.934	0.808	0	CTB 1	PHLDA2
ERVW-1	0	0.66007566414419	0.595	0.372	0	CTB 1	ERVW-1
LARGE2	0	0.656858952378294	0.4	0.116	0	CTB 1	LARGE2
CCNDBP1	0	0.646550634945887	0.64	0.433	0	CTB 1	CCNDBP1
LGR5	0	0.644787176123774	0.326	0.053	0	CTB 1	LGR5
HSPE1	0	0.64166094359854	0.74	0.626	0	CTB 1	HSPE1
LRP2	0	0.641293938137789	0.5	0.203	0	CTB 1	LRP2
NRP1	0	0.63773084520917	0.377	0.103	0	CTB 1	NRP1
MSX2	0	0.635334741505439	0.407	0.152	0	CTB 1	MSX2
COL14A1	0	0.625056019437688	0.31	0.054	0	CTB 1	COL14A1
ADI1	0	0.619563532615954	0.731	0.611	0	CTB 1	ADI1
DOCK8	0	0.614154340489494	0.383	0.145	0	CTB 1	DOCK8
SEMA6A	0	0.614152850258793	0.509	0.248	0	CTB 1	SEMA6A
LRPAP1	0	0.609308554334762	0.834	0.764	0	CTB 1	LRPAP1
MT-CO1	0	0.608185129258318	0.992	0.995	0	CTB 1	MT-CO1
UQCRQ	0	0.607120538812229	0.751	0.682	0	CTB 1	UQCRQ
TBCA	0	0.605859292247062	0.863	0.824	0	CTB 1	TBCA
IQGAP2	0	0.603560860299241	0.377	0.106	0	CTB 1	IQGAP2
AC092718.6	0	0.601038307600239	0.283	0.042	0	CTB 1	AC092718.6
VWA1	0	0.596630337638532	0.675	0.52	0	CTB 1	VWA1
SLC13A3	0	0.590891845755571	0.316	0.07	0	CTB 1	SLC13A3
TBL1X	0	0.585257157559356	0.47	0.223	0	CTB 1	TBL1X
TACC2	0	0.582411984900753	0.452	0.227	0	CTB 1	TACC2
SLC19A1	0	0.582176498942647	0.317	0.066	0	CTB 1	SLC19A1
GNAS	0	0.572517250933603	0.96	0.939	0	CTB 1	GNAS
NREP	0	0.569360945002513	0.29	0.075	0	CTB 1	NREP
CLTA	0	0.542660307341428	0.848	0.821	0	CTB 1	CLTA
IGDCC3	0	0.538823808069969	0.274	0.053	0	CTB 1	IGDCC3
CAT	0	0.53742585698193	0.319	0.117	0	CTB 1	CAT
PRDX2	0	0.527914220647141	0.777	0.721	0	CTB 1	PRDX2
EIF2S2	0	0.524576325080154	0.887	0.864	0	CTB 1	EIF2S2
ATP5ME	0	0.523704780449526	0.868	0.831	0	CTB 1	ATP5ME
PDLIM1	0	0.52262103884253	0.672	0.428	0	CTB 1	PDLIM1
SLC25A6	0	0.521441538365138	0.825	0.806	0	CTB 1	SLC25A6
ADRB1	0	0.519709558104714	0.294	0.085	0	CTB 1	ADRB1
SLC52A1	0	0.517264062724016	0.345	0.137	0	CTB 1	SLC52A1
MT-CO2	0	0.514836316958554	0.991	0.995	0	CTB 1	MT-CO2
ANXA5	0	0.5106655754685	0.939	0.929	0	CTB 1	ANXA5
SPINT2	0	0.50758502013201	0.908	0.847	0	CTB 1	SPINT2
MT-CYB	0	0.489901177391166	0.991	0.993	0	CTB 1	MT-CYB
XAGE3	0	0.489377709933532	0.935	0.783	0	CTB 1	XAGE3
COX7C	0	0.48675033689772	0.889	0.866	0	CTB 1	COX7C
INSL4	0	0.483487796615259	0.335	0.073	0	CTB 1	INSL4
SYT7	0	0.474342657890932	0.255	0.072	0	CTB 1	SYT7
MT-ND1	0	0.473588801885806	0.99	0.995	0	CTB 1	MT-ND1
ATP5MG	0	0.443572858886011	0.858	0.862	0	CTB 1	ATP5MG
DAB2	0	0.439155456394184	0.543	0.282	0	CTB 1	DAB2
RPS21	0	0.438780994736498	0.968	0.956	0	CTB 1	RPS21
DDX5	0	0.425650208429369	0.932	0.921	0	CTB 1	DDX5
RPS29	0	0.424833451174562	0.996	0.987	0	CTB 1	RPS29
COX4I1	0	0.422487550392572	0.877	0.884	0	CTB 1	COX4I1
RPL31	0	0.416412442074902	0.949	0.945	0	CTB 1	RPL31
EGFR	0	0.388099670851731	0.894	0.836	0	CTB 1	EGFR
RPL23	0	0.382479084569965	0.961	0.959	0	CTB 1	RPL23
RPL23A	0	0.366577679838522	0.985	0.978	0	CTB 1	RPL23A
MT-ATP6	0	0.361796164244044	0.992	0.996	0	CTB 1	MT-ATP6
GSTP1	0	0.360337348454446	0.96	0.961	0	CTB 1	GSTP1
MT-ND3	0	0.355581329632186	0.991	0.995	0	CTB 1	MT-ND3
IFI6	0	0.341917954824525	0.989	0.956	0	CTB 1	IFI6
RPL7	0	0.316288703438419	0.962	0.967	0	CTB 1	RPL7
RPS23	0	0.313814139065786	0.992	0.987	0	CTB 1	RPS23
RPS4X	0	0.302621912065153	0.988	0.987	0	CTB 1	RPS4X
RPS25	0	0.297887610995348	0.977	0.977	0	CTB 1	RPS25
RPS14	0	0.263115988804353	0.997	0.993	0	CTB 1	RPS14
NDUFB9	9.99224154341177e-304	0.664631912366183	0.658	0.544	2.40153533254358e-299	CTB 1	NDUFB9
COMT	7.18557488530367e-303	0.646658255640606	0.693	0.597	1.72698106793388e-298	CTB 1	COMT
PISD	1.8252795698632e-302	0.574677370911835	0.387	0.181	4.38687691820923e-298	CTB 1	PISD
APP	9.85277363533763e-301	0.499640630200961	0.782	0.702	2.36801561551705e-296	CTB 1	APP
ANXA6	3.6827189753342e-293	0.535374712470029	0.349	0.147	8.85104678531821e-289	CTB 1	ANXA6
MPP7	6.76586020997503e-293	0.456565367976119	0.269	0.091	1.6261068428654e-288	CTB 1	MPP7
CDO1	2.22879757677513e-292	0.541324616353222	0.491	0.265	5.35669209602134e-288	CTB 1	CDO1
RPS5	4.19833989144258e-290	0.310699513890068	0.958	0.959	1.00902900950931e-285	CTB 1	RPS5
PSMD14	5.06292180397333e-288	0.654274612322869	0.707	0.597	1.21682262636695e-283	CTB 1	PSMD14
ATP5MC3	1.70631091280888e-286	0.491300180792101	0.763	0.736	4.10094764784487e-282	CTB 1	ATP5MC3
KANK1	5.30695930451402e-283	0.581920610232189	0.431	0.23	1.2754745992469e-278	CTB 1	KANK1
PSMB6	1.73328855249193e-280	0.535512412517683	0.723	0.673	4.1657857070591e-276	CTB 1	PSMB6
RPSA	2.5397932645984e-276	0.293016072994776	0.963	0.968	6.10413913213579e-272	CTB 1	RPSA
RPL21	2.28694803860091e-268	0.273596407603752	0.975	0.976	5.49645091597343e-264	CTB 1	RPL21
UTRN	4.57796704418859e-267	0.521563327952625	0.542	0.332	1.10026859940029e-262	CTB 1	UTRN
ATP5F1B	2.2484512971155e-265	0.530717673422956	0.712	0.667	5.40392784748738e-261	CTB 1	ATP5F1B
SIAH2	2.89733102088101e-265	0.577424565835788	0.397	0.203	6.96344537558543e-261	CTB 1	SIAH2
SLC25A3	9.6007841282712e-265	0.418540405869539	0.8	0.809	2.3074524573887e-260	CTB 1	SLC25A3
RPS7	4.21526409584323e-264	0.268622237389971	0.971	0.974	1.01309657279496e-259	CTB 1	RPS7
COX20	1.51940057614328e-263	0.655376999493898	0.56	0.406	3.65172734470276e-259	CTB 1	COX20
RPL14	7.81713899131669e-261	0.257100408060918	0.978	0.98	1.87877118517305e-256	CTB 1	RPL14
FOXO4	5.84350145397921e-259	0.510882297460289	0.575	0.373	1.40442713944936e-254	CTB 1	FOXO4
CBX4	2.63460670941407e-258	0.569890956599226	0.388	0.197	6.33201376540579e-254	CTB 1	CBX4
PSMB1	7.969740257479e-258	0.433458969102627	0.806	0.82	1.9154473734825e-253	CTB 1	PSMB1
CROT	2.5958902104364e-255	0.580140110530963	0.411	0.215	6.23896253176285e-251	CTB 1	CROT
PSMA1	1.39349318194749e-253	0.554204318419334	0.664	0.575	3.34912151349259e-249	CTB 1	PSMA1
ITIH5	3.65797662666211e-253	0.468579562978542	0.796	0.797	8.7915810245197e-249	CTB 1	ITIH5
POLR2L	5.72868258566465e-253	0.50742023773548	0.725	0.677	1.37683157263864e-248	CTB 1	POLR2L
ACADVL	8.38191955207111e-252	0.625685067521121	0.611	0.506	2.01451054514477e-247	CTB 1	ACADVL
HNRNPA2B1	6.51895027625868e-250	0.330178827898234	0.913	0.929	1.56676450939601e-245	CTB 1	HNRNPA2B1
AAK1	2.21367711549693e-245	0.511156162998971	0.762	0.731	5.32035157938532e-241	CTB 1	AAK1
TMEM150A	1.11046591743756e-243	0.483345875319102	0.289	0.119	2.66889378596942e-239	CTB 1	TMEM150A
PEBP1	2.12386336086647e-243	0.386602170263685	0.858	0.858	5.10449320150646e-239	CTB 1	PEBP1
PCOLCE2	3.19927446536513e-241	0.490537223490371	0.303	0.127	7.68913625005855e-237	CTB 1	PCOLCE2
PSMB2	6.61149819374026e-239	0.54044018495035	0.652	0.562	1.58900747588353e-234	CTB 1	PSMB2
CDK6	1.94583026165241e-233	0.49891256508615	0.404	0.216	4.6766084508554e-229	CTB 1	CDK6
ATP2B1	3.81773640255092e-233	0.614490121959639	0.429	0.259	9.17554766989087e-229	CTB 1	ATP2B1
SIAH1	8.79699700450049e-233	0.578871333488422	0.41	0.229	2.11427026006165e-228	CTB 1	SIAH1
CHPT1	2.71931646118336e-232	0.46061264571498	0.266	0.105	6.53560518280808e-228	CTB 1	CHPT1
SCIN	1.72476284959995e-231	0.556164448193173	0.319	0.146	4.14529503272853e-227	CTB 1	SCIN
GSTA4	4.61861640909467e-230	0.506307185728636	0.299	0.132	1.11003826776181e-225	CTB 1	GSTA4
UBAC1	3.15553727465561e-229	0.539524000028528	0.519	0.353	7.5840182859073e-225	CTB 1	UBAC1
RPIA	1.2307979516253e-228	0.519532226107746	0.407	0.229	2.95809979693624e-224	CTB 1	RPIA
ATP5F1A	6.04396832197172e-225	0.526824765958558	0.657	0.599	1.45260734650268e-220	CTB 1	ATP5F1A
LMO4	9.84958225324418e-224	0.34588311679259	0.934	0.905	2.36724859874471e-219	CTB 1	LMO4
ARHGAP18	2.26630388895905e-222	0.516183813656466	0.475	0.298	5.44683476672417e-218	CTB 1	ARHGAP18
COX6C	4.47219165990212e-220	0.415105161693593	0.781	0.805	1.07484654354087e-215	CTB 1	COX6C
ARL4A	6.75592611909445e-220	0.556899979773536	0.363	0.189	1.62371928346316e-215	CTB 1	ARL4A
GSTA3	9.58682299410917e-220	0.429284155553428	0.252	0.097	2.3040970384042e-215	CTB 1	GSTA3
GCNT2	1.20422985292659e-218	0.412259165351064	0.265	0.106	2.89424602852378e-214	CTB 1	GCNT2
AKR1B1	1.9527780274719e-218	0.466130891486937	0.713	0.651	4.69330671122596e-214	CTB 1	AKR1B1
TALDO1	2.00634592637947e-218	0.528987772814718	0.692	0.639	4.82205179946043e-214	CTB 1	TALDO1
SMARCA2	7.04417365906214e-217	0.567455779963439	0.543	0.403	1.69299669721899e-212	CTB 1	SMARCA2
MT-ATP8	3.05101803878257e-213	0.574080204272353	0.684	0.611	7.33281675441004e-209	CTB 1	MT-ATP8
HNRNPM	6.81595011011911e-213	0.501969891053605	0.788	0.786	1.63814544946603e-208	CTB 1	HNRNPM
DPP4	5.71513422633369e-208	0.476130158138941	0.701	0.592	1.37357535995704e-203	CTB 1	DPP4
TPST2	8.29938211063223e-206	0.57355324553765	0.481	0.327	1.99467349646935e-201	CTB 1	TPST2
CTDSPL	6.21372219926895e-203	0.471680061346693	0.338	0.17	1.4934059933723e-198	CTB 1	CTDSPL
RHOBTB1	7.05626688684286e-202	0.388244213589855	0.303	0.138	1.69590318358381e-197	CTB 1	RHOBTB1
UGP2	1.14425051130233e-201	0.305392509031631	0.915	0.923	2.75009167886403e-197	CTB 1	UGP2
MARC1	1.53141144234686e-201	0.422822665847664	0.272	0.119	3.68059426053645e-197	CTB 1	MARC1
PRDX1	1.96463665849787e-200	0.304760982063178	0.904	0.92	4.72180774503379e-196	CTB 1	PRDX1
EXTL2	1.86168438496818e-199	0.521816975001186	0.417	0.254	4.47437225083252e-195	CTB 1	EXTL2
PBX1	8.23989158058177e-198	0.457760455787763	0.363	0.193	1.98037554247702e-193	CTB 1	PBX1
FAM84A	3.02983058981426e-195	0.495714762220687	0.406	0.234	7.28189483955958e-191	CTB 1	FAM84A
ECHDC2	3.62005428129923e-195	0.487882929285491	0.438	0.272	8.70043845967456e-191	CTB 1	ECHDC2
SRP14	1.46811804939955e-194	0.313157577922014	0.878	0.907	3.52847491992687e-190	CTB 1	SRP14
BTG1	1.31381027930803e-193	0.33645306038869	0.847	0.795	3.15761162528893e-189	CTB 1	BTG1
METTL7A	1.99237412805295e-193	0.45254012200391	0.326	0.162	4.78847197936247e-189	CTB 1	METTL7A
TUSC3	3.7245381728089e-193	0.495665228763072	0.678	0.622	8.95155504452892e-189	CTB 1	TUSC3
CCND3	3.70863097740004e-186	0.516881239102684	0.323	0.172	8.91332369108326e-182	CTB 1	CCND3
RASSF6	2.50581904491714e-185	0.518953465191443	0.408	0.25	6.02248549255386e-181	CTB 1	RASSF6
ORMDL1	3.44939052154363e-185	0.547955004016895	0.483	0.349	8.29026517947796e-181	CTB 1	ORMDL1
EID2	4.97241708940262e-185	0.452928725471649	0.32	0.164	1.19507072326703e-180	CTB 1	EID2
MPC2	1.3483536124457e-184	0.585347242189472	0.459	0.321	3.240633072152e-180	CTB 1	MPC2
NCBP3	4.48638935336406e-184	0.525740432826781	0.402	0.252	1.07825881718752e-179	CTB 1	NCBP3
FAM184A	1.13104309308725e-183	0.367780063623801	0.254	0.108	2.7183489699259e-179	CTB 1	FAM184A
NDUFB1	2.80259567627773e-180	0.544892733567418	0.562	0.461	6.73575844836589e-176	CTB 1	NDUFB1
PRELID1	1.27430456723148e-178	0.458877987961189	0.715	0.703	3.06266359688414e-174	CTB 1	PRELID1
EIF3L	7.72697192695604e-177	0.425261903389676	0.723	0.729	1.85710043292462e-172	CTB 1	EIF3L
NUDT4	1.99269890244829e-174	0.454985732949966	0.521	0.369	4.78925254214423e-170	CTB 1	NUDT4
HMGN2	1.65812583283399e-171	0.333861638247288	0.757	0.724	3.98513962663322e-167	CTB 1	HMGN2
SH2D4A	2.0866834586167e-169	0.421156219782301	0.341	0.186	5.01513502443939e-165	CTB 1	SH2D4A
ATP6V1C2	4.21662175543594e-169	0.39562320149717	0.334	0.177	1.01342287270147e-164	CTB 1	ATP6V1C2
APMAP	8.93614710228385e-167	0.427990893329609	0.394	0.238	2.1477135945629e-162	CTB 1	APMAP
PSMD7	1.53441668710658e-166	0.450090943548003	0.663	0.635	3.68781706579195e-162	CTB 1	PSMD7
EIF3G	5.78491789509936e-164	0.462756822903905	0.702	0.709	1.39034716690818e-159	CTB 1	EIF3G
GGCT	1.1445041605338e-161	0.463846195373886	0.457	0.319	2.75070129942692e-157	CTB 1	GGCT
PSMA7	2.40134822969777e-161	0.359377981817437	0.787	0.812	5.77140033525561e-157	CTB 1	PSMA7
TMEM8A	1.65212624046118e-160	0.501419009557694	0.42	0.281	3.97072020632439e-156	CTB 1	TMEM8A
SLC22A18	6.07611932589646e-159	0.457810113561828	0.264	0.131	1.46033451878596e-154	CTB 1	SLC22A18
VAMP8	2.96815028254398e-158	0.311956128567982	0.835	0.869	7.1336523890662e-154	CTB 1	VAMP8
TEX10	6.6304467271375e-158	0.473904236058414	0.333	0.19	1.59356156640023e-153	CTB 1	TEX10
RAB31	1.57681195367684e-157	0.437682660112815	0.453	0.308	3.78970984946692e-153	CTB 1	RAB31
UQCR10	4.73949587907803e-156	0.373981778197313	0.735	0.755	1.13909043957761e-151	CTB 1	UQCR10
SNHG8	9.95374915665608e-156	0.485400335318567	0.531	0.432	2.39228407231072e-151	CTB 1	SNHG8
GHITM	7.6361865054514e-150	0.49573356768632	0.577	0.512	1.83528106472019e-145	CTB 1	GHITM
ANP32A	9.35273754828111e-150	0.505116229706944	0.515	0.42	2.24783694235388e-145	CTB 1	ANP32A
EML4	9.50490837352201e-149	0.473815747221649	0.521	0.414	2.28440967849228e-144	CTB 1	EML4
TSPAN3	1.54093252544554e-147	0.409919318316324	0.278	0.144	3.7034772316558e-143	CTB 1	TSPAN3
NPM1	3.36064498992257e-147	0.260155109016056	0.875	0.912	8.0769741687799e-143	CTB 1	NPM1
ATP5MF	6.53908804193782e-146	0.38190168850999	0.709	0.731	1.57160441999934e-141	CTB 1	ATP5MF
HADHB	3.14035260473041e-145	0.537177264504095	0.441	0.324	7.54752345020907e-141	CTB 1	HADHB
ERVH48-1	1.12429050036715e-144	0.412781214712808	0.552	0.428	2.70211978858241e-140	CTB 1	ERVH48-1
RGS2	2.19609229796866e-144	0.452703428658057	0.28	0.148	5.27808822893787e-140	CTB 1	RGS2
ECH1	5.67038353749659e-141	0.385068733716211	0.697	0.702	1.36281997940193e-136	CTB 1	ECH1
NSG1	5.30440397733909e-140	0.442664670798949	0.405	0.27	1.27486045191368e-135	CTB 1	NSG1
ATP1B3	1.17578307816125e-138	0.452257169313449	0.458	0.339	2.82587705005274e-134	CTB 1	ATP1B3
UQCRB	5.35861346403637e-138	0.344731145690062	0.759	0.798	1.2878891599465e-133	CTB 1	UQCRB
COX6A1	9.61632251679628e-137	0.349006649095689	0.767	0.803	2.31118695368682e-132	CTB 1	COX6A1
NDUFB2	1.15379507349847e-135	0.407151049090598	0.656	0.651	2.77303107964623e-131	CTB 1	NDUFB2
ATP5PO	1.89398972654289e-135	0.429469508545686	0.608	0.575	4.55201490877318e-131	CTB 1	ATP5PO
SND1	2.86253925202407e-134	0.495929019837241	0.546	0.495	6.87982683831465e-130	CTB 1	SND1
RAN	3.46172775556338e-134	0.322562015265643	0.75	0.759	8.31991648772103e-130	CTB 1	RAN
TENM3	2.05868623457636e-129	0.404929727255691	0.493	0.377	4.94784649618082e-125	CTB 1	TENM3
EID1	8.19115521772088e-129	0.483552199182323	0.525	0.457	1.96866224502704e-124	CTB 1	EID1
NRK	4.51781781197349e-128	0.380323264124505	0.547	0.439	1.08581233292971e-123	CTB 1	NRK
CTSV	9.6395342160491e-128	0.493081678263323	0.357	0.23	2.31676565348524e-123	CTB 1	CTSV
MYH10	3.21909886842885e-127	0.392190840802212	0.646	0.602	7.7367822203819e-123	CTB 1	MYH10
CADM1	2.5378583525752e-126	0.360559188519311	0.316	0.18	6.09948876457923e-122	CTB 1	CADM1
ATP5F1C	8.58320218836117e-123	0.36261804036813	0.686	0.699	2.06288681395072e-118	CTB 1	ATP5F1C
STS	1.30633395979514e-122	0.361953537702597	0.327	0.195	3.13964303897164e-118	CTB 1	STS
MUC15	1.86589516269911e-122	0.352526107984356	0.442	0.301	4.48449243403104e-118	CTB 1	MUC15
NUFIP2	1.982755886033e-117	0.393141327335553	0.646	0.635	4.76535549649172e-113	CTB 1	NUFIP2
SLBP	4.23835189552047e-117	0.437601902532218	0.383	0.267	1.01864549456939e-112	CTB 1	SLBP
CTNNB1	6.46886394445715e-117	0.321769362206766	0.706	0.679	1.55472676041083e-112	CTB 1	CTNNB1
ACBD6	8.47101153806344e-116	0.435987882582414	0.422	0.318	2.03592291305817e-111	CTB 1	ACBD6
PNRC1	1.44233162028347e-115	0.385162986183795	0.637	0.618	3.4664998161893e-111	CTB 1	PNRC1
NDUFS8	3.07700252043508e-115	0.45313855689436	0.498	0.428	7.39526785761368e-111	CTB 1	NDUFS8
DLG5	2.51417975946958e-113	0.461313364069441	0.395	0.289	6.04257963390919e-109	CTB 1	DLG5
EIF3J	5.55437238087213e-113	0.35078480160902	0.732	0.741	1.33493785801881e-108	CTB 1	EIF3J
MCM5	2.0647719270855e-112	0.35774529787675	0.288	0.168	4.9624728495573e-108	CTB 1	MCM5
XIST	4.11617782927108e-112	0.471700299875625	0.392	0.271	9.89282179487013e-108	CTB 1	XIST
PSMC3	1.8303747730719e-111	0.42235824178249	0.654	0.652	4.39912272960101e-107	CTB 1	PSMC3
HSD17B4	7.94919955066471e-111	0.454897056424734	0.353	0.243	1.91051062000676e-106	CTB 1	HSD17B4
NR4A1	4.31677999287719e-110	0.433506850178871	0.374	0.249	1.0374949034881e-105	CTB 1	NR4A1
CCDC125	5.41493290081266e-110	0.379938174083905	0.261	0.148	1.30142497338131e-105	CTB 1	CCDC125
PARK7	1.51882795770969e-109	0.319757760556888	0.723	0.766	3.65035111355946e-105	CTB 1	PARK7
PSMA3	2.09070400793649e-109	0.405482701158397	0.597	0.577	5.02479801267455e-105	CTB 1	PSMA3
DEGS1	2.32015236699449e-109	0.381252981597749	0.57	0.484	5.57625419883457e-105	CTB 1	DEGS1
KCNN4	3.88745910762469e-109	0.336982477937663	0.382	0.254	9.34311921926518e-105	CTB 1	KCNN4
MESD	1.40986002768803e-108	0.386317447693835	0.671	0.69	3.38845759054542e-104	CTB 1	MESD
AGL	5.17864603462361e-108	0.405015324636105	0.462	0.357	1.24463578796144e-103	CTB 1	AGL
ADAMTSL4	3.69083062599007e-107	0.423493197019271	0.549	0.484	8.87054232650452e-103	CTB 1	ADAMTSL4
CST3	6.14675307095161e-106	0.288360258048863	0.695	0.653	1.47731063307251e-101	CTB 1	CST3
NCL	1.36683098122721e-105	0.268870272493664	0.832	0.892	3.28504158028148e-101	CTB 1	NCL
BRD4	4.56828794353095e-105	0.38446248146862	0.633	0.643	1.09794232434823e-100	CTB 1	BRD4
NDUFA10	5.09661824813827e-105	0.436987463624056	0.496	0.432	1.22492122975755e-100	CTB 1	NDUFA10
ST13	1.33545635469512e-104	0.257161892941664	0.864	0.909	3.20963580287425e-100	CTB 1	ST13
IDH2	7.67179939375846e-104	0.402970500438932	0.676	0.669	1.84384026629591e-99	CTB 1	IDH2
METAP2	2.35961267338504e-103	0.405303004356727	0.657	0.675	5.67109309921361e-99	CTB 1	METAP2
SLC35B4	3.58406974391044e-103	0.404947934162216	0.321	0.212	8.61395322251436e-99	CTB 1	SLC35B4
MET	3.98018118676173e-103	0.357094144665045	0.508	0.402	9.56596746426315e-99	CTB 1	MET
VDAC1	3.27042866085416e-102	0.359257625617339	0.64	0.659	7.8601482434969e-98	CTB 1	VDAC1
PDCD4	2.43682235872864e-101	0.344916870595386	0.696	0.708	5.85665885696842e-97	CTB 1	PDCD4
GLDC	4.11286710297998e-101	0.353891329654518	0.383	0.266	9.88486479530207e-97	CTB 1	GLDC
EIF2AK1	2.50505714619807e-100	0.431172921322456	0.544	0.513	6.02065434517244e-96	CTB 1	EIF2AK1
CDH1	5.24258873055765e-100	0.364329104258069	0.58	0.517	1.26000377550222e-95	CTB 1	CDH1
NASP	6.94024948779895e-100	0.33412445397283	0.611	0.574	1.6680195618976e-95	CTB 1	NASP
ID2	7.90627809149104e-100	0.335565916175004	0.27	0.156	1.90019487650896e-95	CTB 1	ID2
ESRRA	4.03747492925681e-98	0.451267945976916	0.45	0.37	9.70366724497581e-94	CTB 1	ESRRA
PSMD6	5.14452270294415e-97	0.4326424809211	0.44	0.359	1.2364345864256e-92	CTB 1	PSMD6
MRFAP1	9.62061095964767e-97	0.423414352246054	0.588	0.589	2.31221763804172e-92	CTB 1	MRFAP1
ZFAT	1.12677126955194e-96	0.402205281465615	0.372	0.271	2.70808206924114e-92	CTB 1	ZFAT
PPA1	1.54658400781805e-96	0.37482719203245	0.63	0.632	3.71706000438991e-92	CTB 1	PPA1
FKBP3	2.61291574761949e-96	0.399340182516263	0.482	0.414	6.27988170782868e-92	CTB 1	FKBP3
ITGA6	9.32596086313714e-96	0.317491095431339	0.655	0.609	2.24140143384638e-91	CTB 1	ITGA6
MRPL1	2.72072312356782e-95	0.426572753250327	0.439	0.351	6.5389859551829e-91	CTB 1	MRPL1
PSMB5	6.79440948452117e-94	0.381500764762078	0.623	0.643	1.63296837550982e-89	CTB 1	PSMB5
RETREG1	2.37263283008952e-91	0.295876307439783	0.256	0.148	5.70238574383716e-87	CTB 1	RETREG1
CD46	3.46647402089924e-91	0.326894374554068	0.733	0.785	8.33132366182924e-87	CTB 1	CD46
ZFX	4.44347667738211e-91	0.393747668758194	0.349	0.247	1.06794518464202e-86	CTB 1	ZFX
CPT2	8.84144684288653e-91	0.345466321247889	0.253	0.153	2.12495333421935e-86	CTB 1	CPT2
PSIP1	3.0653055137396e-90	0.360579206081505	0.311	0.205	7.36715527172175e-86	CTB 1	PSIP1
CTNNAL1	9.9598403861956e-90	0.355260944487824	0.578	0.537	2.39374803841825e-85	CTB 1	CTNNAL1
ANK3	8.72583100505691e-89	0.312331206414204	0.262	0.158	2.09716622375538e-84	CTB 1	ANK3
RBMX	8.79849556427134e-89	0.389404514417919	0.648	0.643	2.11463042391697e-84	CTB 1	RBMX
ARHGAP23	1.67935929383806e-88	0.353910069639191	0.317	0.21	4.0361721268104e-84	CTB 1	ARHGAP23
SYF2	4.19663286196509e-88	0.397801746716367	0.618	0.618	1.00861874204469e-83	CTB 1	SYF2
SNRPG	2.36149700595897e-87	0.32520799935559	0.65	0.685	5.67562190412179e-83	CTB 1	SNRPG
MOCS2	3.42557473285666e-87	0.350429127784219	0.251	0.154	8.23302631294769e-83	CTB 1	MOCS2
SLC29A1	7.8291753275733e-87	0.355505356751267	0.352	0.248	1.88166399822897e-82	CTB 1	SLC29A1
CNN3	5.45771770640633e-86	0.341658954939697	0.424	0.321	1.3117078735577e-81	CTB 1	CNN3
SLK	5.66750124328689e-86	0.425055693385497	0.443	0.363	1.36212724881157e-81	CTB 1	SLK
USP53	1.46724337247529e-85	0.383785574486163	0.57	0.521	3.52637272140712e-81	CTB 1	USP53
MCRIP2	1.49667945259478e-85	0.37257767012375	0.276	0.18	3.59711939636629e-81	CTB 1	MCRIP2
LGR4	4.3078440578916e-85	0.377751032013154	0.339	0.241	1.03534724087367e-80	CTB 1	LGR4
MRPL4	1.10558142925785e-83	0.386570091422523	0.336	0.245	2.65715440707831e-79	CTB 1	MRPL4
FUCA1	2.25802242986165e-83	0.42408549429738	0.364	0.276	5.42693110792949e-79	CTB 1	FUCA1
LYPLAL1	2.12525931853977e-82	0.352234938396679	0.285	0.187	5.10784824617848e-78	CTB 1	LYPLAL1
SH3GLB2	4.85679284120114e-82	0.443810939854128	0.453	0.39	1.16728159145428e-77	CTB 1	SH3GLB2
VCP	8.13101326415916e-82	0.367486170832102	0.595	0.605	1.95420772790801e-77	CTB 1	VCP
TBX3	3.97935075629394e-81	0.302026190852702	0.338	0.234	9.56397160767685e-77	CTB 1	TBX3
HACD3	4.3284253520522e-81	0.375796066403323	0.458	0.375	1.04029374911223e-76	CTB 1	HACD3
COX7B	2.30207644227677e-80	0.37281301538884	0.571	0.563	5.532810521368e-76	CTB 1	COX7B
EXOC1	3.67133462386535e-80	0.442102732321102	0.451	0.389	8.82368563499799e-76	CTB 1	EXOC1
DNAJB4	3.96702311524727e-80	0.435171744169207	0.377	0.29	9.53434335518529e-76	CTB 1	DNAJB4
MRPS26	5.58683400528137e-80	0.409937717704314	0.411	0.337	1.34273968482932e-75	CTB 1	MRPS26
SLC12A9	9.7179995145938e-80	0.354974290771555	0.293	0.198	2.33562400333747e-75	CTB 1	SLC12A9
CD2AP	3.66250680688419e-76	0.367741406426792	0.371	0.283	8.80246885966546e-72	CTB 1	CD2AP
EPB41L4A-AS1	4.44035055422463e-76	0.36613606263785	0.329	0.239	1.06719385220235e-71	CTB 1	EPB41L4A-AS1
NR2F2	1.03551812072136e-75	0.333806693278016	0.473	0.386	2.48876425134172e-71	CTB 1	NR2F2
SLC20A1	3.40217413169198e-75	0.434373781267768	0.36	0.275	8.17678530810849e-71	CTB 1	SLC20A1
PFDN1	3.49580940538844e-75	0.402903191837706	0.456	0.399	8.40182832491058e-71	CTB 1	PFDN1
NSA2	1.74358006217152e-73	0.305352216531121	0.725	0.767	4.19052032142304e-69	CTB 1	NSA2
UVRAG	6.48326766634826e-73	0.324676295096918	0.269	0.177	1.55818855093014e-68	CTB 1	UVRAG
TMA7	1.63566699840067e-72	0.256456490361757	0.776	0.825	3.93116206395616e-68	CTB 1	TMA7
FDFT1	2.32835290627353e-72	0.39841562517428	0.469	0.422	5.5959633749378e-68	CTB 1	FDFT1
NCOA3	3.83120633198835e-72	0.393151343387931	0.516	0.484	9.20792129830081e-68	CTB 1	NCOA3
PSMB7	1.74394147968168e-70	0.371732941366793	0.539	0.538	4.19138895226694e-66	CTB 1	PSMB7
SMIM4	4.17034725957337e-69	0.3506359537133	0.259	0.174	1.00230126036586e-64	CTB 1	SMIM4
GJA1	1.68081843407681e-68	0.315886120054946	0.269	0.178	4.0396790244602e-64	CTB 1	GJA1
TDRP	1.53007461059643e-67	0.365134446938336	0.434	0.37	3.67738131910745e-63	CTB 1	TDRP
CSRP2	5.74847973574066e-67	0.330608028885216	0.546	0.509	1.38158961968791e-62	CTB 1	CSRP2
SURF6	6.94736780612906e-67	0.409984044046986	0.327	0.25	1.66973037852506e-62	CTB 1	SURF6
DDIT3	3.2724087522805e-66	0.349750579710069	0.446	0.362	7.86490719523095e-62	CTB 1	DDIT3
C11orf58	8.17860756201387e-65	0.281237442138534	0.718	0.784	1.96564654145441e-60	CTB 1	C11orf58
CPPED1	3.33269096766792e-64	0.339759736022769	0.297	0.215	8.00978947169307e-60	CTB 1	CPPED1
C1QBP	5.22619996094612e-64	0.326683899397459	0.511	0.484	1.25606489861379e-59	CTB 1	C1QBP
ETFA	8.82642775274384e-64	0.385951079951358	0.461	0.418	2.12134364609445e-59	CTB 1	ETFA
ADH5	3.32758233759262e-63	0.340981612117834	0.546	0.54	7.99751139017011e-59	CTB 1	ADH5
XRCC6	5.10225601838031e-63	0.323643662837329	0.608	0.646	1.22627621145752e-58	CTB 1	XRCC6
PHACTR2	8.91207748160161e-63	0.341202593088151	0.371	0.297	2.14192870192813e-58	CTB 1	PHACTR2
MRPS6	1.36431348951329e-62	0.374941393807851	0.426	0.365	3.27899104069623e-58	CTB 1	MRPS6
PSMA4	2.67895517918356e-61	0.3498898147151	0.527	0.525	6.43860087764978e-57	CTB 1	PSMA4
SNRPF	1.07227328992612e-60	0.335730293921533	0.523	0.514	2.57710162500844e-56	CTB 1	SNRPF
STK17A	1.92325308802613e-60	0.369447500063597	0.362	0.295	4.622346471762e-56	CTB 1	STK17A
NDUFS5	3.03567548372842e-60	0.280250901543679	0.669	0.734	7.29594245759289e-56	CTB 1	NDUFS5
DUSP14	2.13424929331791e-59	0.337727593660789	0.426	0.365	5.12945475156026e-55	CTB 1	DUSP14
FAM210B	8.81832970056846e-59	0.324995146001398	0.286	0.209	2.11939736023462e-54	CTB 1	FAM210B
C1orf21	1.22297978475867e-58	0.320401051753847	0.383	0.305	2.93930961468898e-54	CTB 1	C1orf21
CISD1	1.40791372799845e-58	0.31578248826676	0.299	0.221	3.38377985387147e-54	CTB 1	CISD1
P2RY6	3.49409744067823e-58	0.290510373805835	0.307	0.223	8.39771378892605e-54	CTB 1	P2RY6
SLC38A9	3.94947626841069e-58	0.322392647326499	0.399	0.33	9.49217126349825e-54	CTB 1	SLC38A9
NUBP1	3.95398375552001e-58	0.371069317392151	0.263	0.186	9.50300455801679e-54	CTB 1	NUBP1
ATP5MC1	6.14008400153703e-58	0.385125201792728	0.455	0.434	1.47570778892941e-53	CTB 1	ATP5MC1
LPCAT3	9.65567158918375e-58	0.351040192918314	0.318	0.245	2.32064410974442e-53	CTB 1	LPCAT3
MAGED1	1.04987932910342e-57	0.293561555679841	0.663	0.666	2.52327997956716e-53	CTB 1	MAGED1
AP2M1	1.48913182672767e-57	0.315497607855944	0.622	0.665	3.57897943235728e-53	CTB 1	AP2M1
ATP10D	1.99966429265895e-57	0.363202188943827	0.377	0.311	4.80599316097652e-53	CTB 1	ATP10D
VAV3	5.26744399515958e-57	0.351456792482375	0.485	0.455	1.26597748979665e-52	CTB 1	VAV3
PYURF	7.43133109190059e-57	0.369317314860366	0.441	0.402	1.78604611462739e-52	CTB 1	PYURF
NAP1L1	2.33935169080033e-56	0.269957033247128	0.658	0.699	5.62239785366951e-52	CTB 1	NAP1L1
TOP1	3.96175673053273e-56	0.303237838302771	0.603	0.649	9.52168612616236e-52	CTB 1	TOP1
CCDC32	3.96369261364309e-56	0.31554502297135	0.269	0.194	9.52633882762979e-52	CTB 1	CCDC32
CMTM6	9.38305675966268e-56	0.341938593438559	0.516	0.511	2.25512386161733e-51	CTB 1	CMTM6
GRHPR	9.4356378839392e-56	0.379486188457521	0.379	0.323	2.26776120902595e-51	CTB 1	GRHPR
CTNNBL1	3.02181953313209e-55	0.40817500238762	0.371	0.314	7.26264106592966e-51	CTB 1	CTNNBL1
NDUFA6	8.87366125152888e-55	0.357618669043148	0.527	0.532	2.13269574519245e-50	CTB 1	NDUFA6
ROMO1	9.03336899949836e-55	0.296686197767902	0.633	0.686	2.17107990533944e-50	CTB 1	ROMO1
PTPN1	1.11004812545509e-54	0.328283591735114	0.353	0.286	2.66788966471877e-50	CTB 1	PTPN1
SUCLG1	2.23989395627991e-54	0.369731402952398	0.41	0.367	5.38336113452313e-50	CTB 1	SUCLG1
MSI2	9.86699063481732e-54	0.361482712330981	0.424	0.38	2.371432529172e-49	CTB 1	MSI2
SIL1	1.19704920584158e-52	0.33536061053395	0.613	0.626	2.87698806131965e-48	CTB 1	SIL1
SEMA6D	8.74984059087587e-52	0.303891632412766	0.268	0.191	2.10293668761111e-47	CTB 1	SEMA6D
NFE2L2	2.08652439646328e-51	0.3342910873625	0.52	0.507	5.01475273445984e-47	CTB 1	NFE2L2
MRPS15	2.22609698465112e-51	0.349535576965366	0.42	0.386	5.35020149291051e-47	CTB 1	MRPS15
PRDX3	3.8900235892208e-51	0.353349135842167	0.478	0.465	9.34928269433326e-47	CTB 1	PRDX3
FRMD6	6.71323515132484e-51	0.28284843900498	0.256	0.181	1.61345893626941e-46	CTB 1	FRMD6
COA4	2.89310878500335e-50	0.356769998525639	0.423	0.391	6.95329765387705e-46	CTB 1	COA4
PPP1R10	3.59218758458444e-50	0.341783552476138	0.504	0.479	8.63346364079024e-46	CTB 1	PPP1R10
HADHA	2.34346714543195e-49	0.371979587735306	0.464	0.45	5.63228893733114e-45	CTB 1	HADHA
PSMD11	2.77056103988946e-49	0.336928377790811	0.454	0.429	6.65876640327033e-45	CTB 1	PSMD11
PDAP1	1.54773937583017e-48	0.321456799536012	0.583	0.625	3.71983681587024e-44	CTB 1	PDAP1
AURKAIP1	1.85448656903999e-48	0.298456160904094	0.605	0.659	4.45707302003072e-44	CTB 1	AURKAIP1
EIF3F	4.36916819591943e-48	0.278196635367146	0.609	0.669	1.05008588420728e-43	CTB 1	EIF3F
NDUFA4	9.70981549822503e-48	0.276478004669712	0.624	0.685	2.3336570568434e-43	CTB 1	NDUFA4
ECHDC1	1.11340554167571e-47	0.332851340995528	0.305	0.242	2.67595887886339e-43	CTB 1	ECHDC1
NELFCD	1.18763667328037e-47	0.320944752608353	0.322	0.259	2.85436598056204e-43	CTB 1	NELFCD
PSMB3	5.75383942935106e-47	0.302067338201752	0.567	0.604	1.38287776845023e-42	CTB 1	PSMB3
GPC3	7.16872289070774e-47	0.38351895806971	0.251	0.182	1.7229308595527e-42	CTB 1	GPC3
CSF2RA	1.27481392539027e-46	0.312838732216095	0.561	0.59	3.06388778828298e-42	CTB 1	CSF2RA
ATP6V1E1	1.43430833133172e-46	0.318267235995761	0.569	0.594	3.44721664352265e-42	CTB 1	ATP6V1E1
ENY2	2.61551962072873e-46	0.337227644215578	0.523	0.538	6.28613985645943e-42	CTB 1	ENY2
COX5A	3.38126343904998e-46	0.292775277864777	0.597	0.647	8.12652854941273e-42	CTB 1	COX5A
RBM8A	1.24611810786044e-45	0.274214467766467	0.617	0.665	2.99492026043178e-41	CTB 1	RBM8A
STOM	2.51002476906341e-45	0.33021159816958	0.364	0.31	6.03259352996699e-41	CTB 1	STOM
ENAH	8.67176973877674e-45	0.252142703593027	0.321	0.247	2.0841731390176e-40	CTB 1	ENAH
SLIRP	9.95661112873741e-45	0.316808631825877	0.54	0.57	2.39297191868075e-40	CTB 1	SLIRP
NDUFS6	1.29948587100878e-44	0.295857439741797	0.544	0.569	3.12318434238251e-40	CTB 1	NDUFS6
DUSP5	1.77744125797711e-44	0.330810425845928	0.337	0.275	4.27190231942218e-40	CTB 1	DUSP5
LYRM2	1.5432727293435e-43	0.312324902997976	0.333	0.275	3.70910167770416e-39	CTB 1	LYRM2
BEX4	1.93741953593842e-43	0.289294843685999	0.59	0.625	4.65639411267439e-39	CTB 1	BEX4
SKP2	2.17798520711597e-43	0.32660309511128	0.425	0.389	5.23456964678251e-39	CTB 1	SKP2
ZNHIT1	4.80344142123728e-43	0.269539526312536	0.673	0.729	1.15445911118017e-38	CTB 1	ZNHIT1
SSBP1	5.72242601389091e-43	0.289056669940588	0.545	0.568	1.37532786817854e-38	CTB 1	SSBP1
APEX1	1.01801732210896e-42	0.329270147806519	0.429	0.405	2.44670283195667e-38	CTB 1	APEX1
LATS2	1.48655730027073e-42	0.358279774003172	0.343	0.29	3.57279181547068e-38	CTB 1	LATS2
NUDCD2	1.86720053490011e-42	0.266517552557159	0.258	0.192	4.48762976557893e-38	CTB 1	NUDCD2
NARS	6.31415839059105e-42	0.3189948826921	0.556	0.588	1.51754482759465e-37	CTB 1	NARS
ATP5MPL	9.23108055404947e-42	0.25647210863963	0.635	0.709	2.21859790036025e-37	CTB 1	ATP5MPL
MRPL27	1.45952300976921e-41	0.310301843649485	0.448	0.427	3.50781760167933e-37	CTB 1	MRPL27
MCM3	4.53058384070705e-41	0.267584080555743	0.299	0.234	1.08888052027553e-36	CTB 1	MCM3
SNRPB2	4.75446552671901e-41	0.303137862300803	0.564	0.602	1.14268824469165e-36	CTB 1	SNRPB2
GRAMD2A	2.3415253701346e-40	0.289720744841318	0.328	0.267	5.62762207458151e-36	CTB 1	GRAMD2A
AHSA1	4.8603743739312e-39	0.30646988706236	0.358	0.311	1.16814237703062e-34	CTB 1	AHSA1
PDHB	6.67528794769446e-39	0.330549739562263	0.315	0.262	1.60433870534889e-34	CTB 1	PDHB
TRIOBP	9.02864731854915e-39	0.30249204578003	0.494	0.495	2.1699450965401e-34	CTB 1	TRIOBP
LMO7	1.03986589626391e-38	0.271013991630616	0.263	0.202	2.49921369508067e-34	CTB 1	LMO7
TMED4	1.27415218254408e-38	0.345179189061859	0.494	0.504	3.06229735552644e-34	CTB 1	TMED4
ATP5IF1	6.0175465394895e-38	0.27624257214998	0.557	0.598	1.44625713530091e-33	CTB 1	ATP5IF1
DLG1	6.06033525588138e-38	0.329198235815167	0.335	0.291	1.45654097539853e-33	CTB 1	DLG1
MAGED2	6.41305866838413e-38	0.359060730419172	0.55	0.594	1.54131452035944e-33	CTB 1	MAGED2
MRPL20	1.61970801987791e-37	0.296639645607726	0.576	0.637	3.89280625497457e-33	CTB 1	MRPL20
PSMD3	1.96547734912405e-37	0.322939822582639	0.404	0.38	4.72382826088474e-33	CTB 1	PSMD3
ECI1	2.25902328232567e-37	0.345996831849204	0.399	0.377	5.4293365567415e-33	CTB 1	ECI1
DDX52	3.3044833469192e-37	0.333887294472601	0.301	0.25	7.94199527598561e-33	CTB 1	DDX52
PMVK	5.24006201282303e-37	0.298158153488222	0.335	0.288	1.25939650416189e-32	CTB 1	PMVK
ISCU	8.57587640813078e-37	0.293320994409788	0.538	0.55	2.06112613593015e-32	CTB 1	ISCU
TRA2B	2.01431476401448e-36	0.255905998056772	0.63	0.687	4.8412041038324e-32	CTB 1	TRA2B
PMPCB	2.59930921736552e-36	0.321981733415192	0.307	0.257	6.2471797730163e-32	CTB 1	PMPCB
NDUFV2	4.50101164318834e-36	0.29542366048115	0.533	0.568	1.08177313832389e-31	CTB 1	NDUFV2
ATP5F1D	4.87804764580291e-36	0.254897398799574	0.621	0.705	1.17238997119227e-31	CTB 1	ATP5F1D
TLE4	5.82543252457554e-36	0.278289371468827	0.552	0.564	1.40008445295649e-31	CTB 1	TLE4
SMIM26	1.28867937214708e-35	0.306113202290957	0.389	0.362	3.09721200301829e-31	CTB 1	SMIM26
MT-ND6	1.87719253634955e-35	0.335389088056105	0.411	0.384	4.5116445418625e-31	CTB 1	MT-ND6
PSMC4	2.37042446075836e-35	0.326220188870025	0.412	0.391	5.69707814898664e-31	CTB 1	PSMC4
BRIX1	5.07974709871874e-35	0.295984614329999	0.311	0.26	1.22086641770606e-30	CTB 1	BRIX1
NUDT22	5.38193418577749e-35	0.320961780861123	0.307	0.261	1.29349406220976e-30	CTB 1	NUDT22
IDH3B	2.26234107639179e-34	0.28497878981018	0.306	0.256	5.43731054300002e-30	CTB 1	IDH3B
TRA2A	3.64539584093393e-34	0.30236720367031	0.478	0.474	8.76134436410062e-30	CTB 1	TRA2A
CD47	4.79499048967526e-34	0.290488899908425	0.475	0.462	1.15242801428855e-29	CTB 1	CD47
C1orf131	1.11340646821611e-33	0.308985417450257	0.326	0.283	2.67596110571061e-29	CTB 1	C1orf131
ELL	1.48380707015035e-33	0.373523541332151	0.277	0.233	3.56618191239936e-29	CTB 1	ELL
BAG1	2.5213226411746e-33	0.308459533350026	0.362	0.328	6.05974683579902e-29	CTB 1	BAG1
NINJ1	3.83212050688604e-33	0.287036152764542	0.276	0.222	9.2101184262499e-29	CTB 1	NINJ1
MDH2	1.09397119463357e-32	0.302789295634257	0.498	0.523	2.62925036918233e-28	CTB 1	MDH2
C8orf33	1.31738461958253e-32	0.308356598087888	0.33	0.287	3.16620219470466e-28	CTB 1	C8orf33
SNRPD2	3.0128304798537e-32	0.26333456424109	0.578	0.641	7.24103677528039e-28	CTB 1	SNRPD2
NDUFV1	3.51073042322363e-32	0.313240308856529	0.403	0.385	8.43768949917568e-28	CTB 1	NDUFV1
ADRM1	4.79174705375073e-32	0.332078357235226	0.412	0.404	1.15164848689845e-27	CTB 1	ADRM1
PSMC2	5.23144821619073e-32	0.313090608043927	0.36	0.328	1.25732626427928e-27	CTB 1	PSMC2
C1GALT1	6.10940410288897e-32	0.318967130639075	0.427	0.414	1.46833418208834e-27	CTB 1	C1GALT1
CYB5A	6.65835218019346e-32	0.2828222802031	0.473	0.473	1.6002683629877e-27	CTB 1	CYB5A
PGP	1.14966168540442e-31	0.341350875387711	0.354	0.322	2.76309689470099e-27	CTB 1	PGP
ADD3	1.18713229352657e-31	0.316225174355991	0.342	0.305	2.85315375426177e-27	CTB 1	ADD3
UQCRFS1	1.52950378757865e-31	0.305956041293908	0.445	0.445	3.67600940306654e-27	CTB 1	UQCRFS1
RTRAF	2.1570064696131e-31	0.275020415420304	0.551	0.608	5.18414934906813e-27	CTB 1	RTRAF
STARD10	2.90082275441696e-31	0.273477383247508	0.546	0.591	6.97183740796572e-27	CTB 1	STARD10
SMYD2	3.00628060815179e-31	0.325026566153498	0.377	0.355	7.225294813632e-27	CTB 1	SMYD2
PHF20	5.81828558991369e-31	0.300201849987845	0.352	0.318	1.39836675867986e-26	CTB 1	PHF20
LAMB1	8.28805463260858e-31	0.260019130129343	0.582	0.631	1.99195105040115e-26	CTB 1	LAMB1
NDUFC2	1.02279717520222e-30	0.283967948212122	0.547	0.594	2.45819073088101e-26	CTB 1	NDUFC2
MRPL19	1.09668392261031e-30	0.292942588182413	0.327	0.287	2.63577013960161e-26	CTB 1	MRPL19
CAMK2G	1.28564829286317e-30	0.326190816946534	0.436	0.431	3.08992710706734e-26	CTB 1	CAMK2G
PSMB4	1.37582178229265e-30	0.31122476102515	0.431	0.429	3.30665007156215e-26	CTB 1	PSMB4
NDUFB10	1.51859212867593e-30	0.265914555906803	0.565	0.631	3.64978432205973e-26	CTB 1	NDUFB10
TSPAN13	1.62163086059856e-30	0.315719233828916	0.392	0.367	3.89742761036257e-26	CTB 1	TSPAN13
EPB41L3	2.40674265953316e-30	0.278489671501296	0.295	0.249	5.78436530792201e-26	CTB 1	EPB41L3
THOC7	4.9108396012804e-30	0.323847761405777	0.482	0.502	1.18027118977173e-25	CTB 1	THOC7
E2F4	1.63445572857809e-29	0.288604745620177	0.32	0.28	3.92825089806458e-25	CTB 1	E2F4
FXR1	2.24574426101464e-29	0.271628396325152	0.613	0.675	5.39742175692258e-25	CTB 1	FXR1
PSMC5	5.54285923519739e-29	0.293755072020571	0.49	0.514	1.33217078858734e-24	CTB 1	PSMC5
HSD17B10	1.05148264890385e-28	0.322981500506569	0.364	0.339	2.5271333983755e-24	CTB 1	HSD17B10
LCMT1	2.86176865499567e-28	0.265891227573073	0.26	0.215	6.87797478541658e-24	CTB 1	LCMT1
PRMT2	2.90138059390309e-28	0.294826527938901	0.577	0.623	6.97317811938668e-24	CTB 1	PRMT2
TCEAL8	4.21753486084683e-28	0.274661738410215	0.659	0.72	1.01364232845593e-23	CTB 1	TCEAL8
TIMM13	4.28144463688008e-28	0.29801098094046	0.498	0.533	1.02900240402776e-23	CTB 1	TIMM13
ITGAV	4.53048599315802e-27	0.293352814365833	0.383	0.364	1.0888570035956e-22	CTB 1	ITGAV
GTF2A2	5.63935367665166e-27	0.301921436008373	0.477	0.5	1.35536226264646e-22	CTB 1	GTF2A2
PAICS	7.40564836641341e-27	0.267213138660343	0.33	0.293	1.7798735283838e-22	CTB 1	PAICS
LAMA5	1.00483972248777e-26	0.255161956248839	0.518	0.538	2.4150317890271e-22	CTB 1	LAMA5
ATIC	1.25321970751979e-26	0.307340559769722	0.411	0.406	3.01198824505307e-22	CTB 1	ATIC
HIGD2A	1.54659689120533e-26	0.297122902679439	0.372	0.356	3.71709096832289e-22	CTB 1	HIGD2A
PRKCZ	1.79964394819213e-26	0.264882099852359	0.32	0.286	4.32526426508496e-22	CTB 1	PRKCZ
ASNSD1	3.63085023023915e-26	0.27707934617942	0.283	0.243	8.72638544335678e-22	CTB 1	ASNSD1
COMMD1	4.1681809179674e-26	0.288727289224152	0.336	0.307	1.00178060182429e-21	CTB 1	COMMD1
NDUFB5	1.22499278865066e-25	0.293680451618718	0.402	0.398	2.944147668243e-21	CTB 1	NDUFB5
STOML2	1.72378767429961e-25	0.287025534320728	0.434	0.438	4.14295129641169e-21	CTB 1	STOML2
SNX4	2.56506313382245e-25	0.308728676626781	0.339	0.313	6.16487273582887e-21	CTB 1	SNX4
PSMC6	5.85757314121222e-25	0.288144420696921	0.438	0.439	1.40780912875895e-20	CTB 1	PSMC6
VDAC3	7.19822303561888e-25	0.274587392613797	0.309	0.274	1.73002092438064e-20	CTB 1	VDAC3
NDUFA3	1.51696233838225e-24	0.290844018317332	0.503	0.546	3.64586728406789e-20	CTB 1	NDUFA3
FDPS	1.85450391874894e-24	0.264452672530512	0.37	0.346	4.4571147183212e-20	CTB 1	FDPS
PTRHD1	3.32949843261895e-24	0.303408924793623	0.359	0.344	8.00211653295638e-20	CTB 1	PTRHD1
CCT3	6.66253239537933e-24	0.261195131223911	0.485	0.517	1.60127303590547e-19	CTB 1	CCT3
NDUFB3	1.06698328673225e-23	0.290014008174055	0.426	0.433	2.56438763133229e-19	CTB 1	NDUFB3
CTNND1	3.08916293104959e-23	0.256524417639968	0.528	0.563	7.42449418848459e-19	CTB 1	CTNND1
TOMM34	3.51496486103997e-23	0.261264378902775	0.295	0.256	8.44786654702346e-19	CTB 1	TOMM34
PSMD4	5.40083956183741e-23	0.29210149213975	0.465	0.5	1.298037780292e-18	CTB 1	PSMD4
RPAP3	1.14802536600145e-22	0.282929406237335	0.267	0.232	2.75916416464788e-18	CTB 1	RPAP3
RIMKLB	2.13481696707319e-22	0.275121432024055	0.318	0.287	5.1308190986637e-18	CTB 1	RIMKLB
PSMD2	2.9788908906121e-22	0.28592943398688	0.464	0.494	7.15946636649713e-18	CTB 1	PSMD2
PRPF4B	3.0148190775977e-22	0.273976665615807	0.567	0.633	7.24581617109832e-18	CTB 1	PRPF4B
GTF2H5	3.71397833797347e-22	0.281354194587276	0.342	0.325	8.92617553748543e-18	CTB 1	GTF2H5
COASY	4.33014187015824e-22	0.294150424278982	0.265	0.231	1.04070629707383e-17	CTB 1	COASY
NENF	4.67248407296155e-22	0.266241745726832	0.448	0.468	1.12298482209558e-17	CTB 1	NENF
HSPA9	6.20452591523103e-22	0.269452162283246	0.446	0.463	1.49119575846663e-17	CTB 1	HSPA9
MRPS33	8.49126412240197e-22	0.270945800132279	0.292	0.261	2.04079041917809e-17	CTB 1	MRPS33
NDUFAB1	2.72675917453176e-21	0.270366228003001	0.49	0.536	6.55349300006964e-17	CTB 1	NDUFAB1
STK26	5.47642500887814e-21	0.27931167737423	0.269	0.236	1.31620398663377e-16	CTB 1	STK26
PHB2	7.39186359340159e-21	0.270311779458255	0.475	0.51	1.77656049603814e-16	CTB 1	PHB2
MRPS7	7.64954987476673e-21	0.286044889724604	0.359	0.349	1.83849281690144e-16	CTB 1	MRPS7
MRPS21	2.30581302249682e-20	0.278618741929417	0.408	0.416	5.54179101826886e-16	CTB 1	MRPS21
C8orf59	7.74351713365955e-20	0.280017715469011	0.47	0.51	1.86107690790374e-15	CTB 1	C8orf59
ASPH	1.38472196121038e-19	0.272712054578723	0.453	0.478	3.32804076157304e-15	CTB 1	ASPH
ZSWIM7	1.913149913056e-19	0.276878113363868	0.298	0.275	4.59806450103879e-15	CTB 1	ZSWIM7
KLHL42	2.22861624230348e-19	0.250371845804197	0.271	0.239	5.35625627675218e-15	CTB 1	KLHL42
HRAS	4.25232205460057e-19	0.271052446182591	0.279	0.252	1.0220030826027e-14	CTB 1	HRAS
GSTK1	9.33522740649245e-19	0.262774237417635	0.446	0.467	2.24362855487639e-14	CTB 1	GSTK1
PDE4DIP	3.63407013506759e-18	0.269900787249035	0.497	0.535	8.73412416262144e-14	CTB 1	PDE4DIP
DYNLL2	3.84837950491261e-18	0.284036278833522	0.431	0.45	9.24919530210698e-14	CTB 1	DYNLL2
TMEM245	4.25189551549741e-18	0.259807343963364	0.324	0.301	1.02190056819465e-13	CTB 1	TMEM245
UQCRC2	4.35063916958294e-18	0.27128806363665	0.419	0.434	1.04563261801756e-13	CTB 1	UQCRC2
TIMM8B	6.12709483926407e-18	0.279992420198302	0.424	0.446	1.47258597366873e-13	CTB 1	TIMM8B
DNAJC21	6.69697618081475e-18	0.281037585563595	0.367	0.359	1.60955125529702e-13	CTB 1	DNAJC21
PPFIA1	1.36602476241682e-17	0.279748422320596	0.35	0.343	3.28310391399259e-13	CTB 1	PPFIA1
ZCRB1	1.82422492331256e-17	0.262552562949732	0.363	0.355	4.38434218068941e-13	CTB 1	ZCRB1
PSMD1	1.182866752122e-16	0.258564798584699	0.497	0.554	2.84290195205002e-12	CTB 1	PSMD1
N4BP2	6.40514244429146e-16	0.276300128375455	0.319	0.307	1.53941193506101e-11	CTB 1	N4BP2
SLC39A10	1.02073046753714e-15	0.273676658348126	0.449	0.475	2.45322360567877e-11	CTB 1	SLC39A10
RBBP4	5.89293924304881e-15	0.286861140253502	0.432	0.456	1.41630901767435e-10	CTB 1	RBBP4
MAGOH	7.91767740760182e-15	0.250735262257101	0.395	0.402	1.90293458814302e-10	CTB 1	MAGOH
TUFM	8.8528394019623e-15	0.255154455880884	0.46	0.51	2.12769142186762e-10	CTB 1	TUFM
PSMD13	9.56457776499694e-15	0.264964758562208	0.43	0.46	2.29875062003936e-10	CTB 1	PSMD13
RARS	1.1538227756818e-14	0.283207406401221	0.41	0.43	2.77309765907364e-10	CTB 1	RARS
NDUFC1	1.56380868377203e-14	0.277017847249501	0.383	0.393	3.75845779057769e-10	CTB 1	NDUFC1
MRPL57	1.6193530624874e-14	0.25325909300363	0.394	0.409	3.89195315038221e-10	CTB 1	MRPL57
NDUFS7	2.00224148043054e-14	0.26101332355596	0.383	0.393	4.81218717406676e-10	CTB 1	NDUFS7
COX14	2.7123147788544e-14	0.2708404452229	0.393	0.408	6.51877733949865e-10	CTB 1	COX14
NDUFS2	1.16088664588393e-13	0.263055343178318	0.32	0.31	2.79007496471744e-09	CTB 1	NDUFS2
PWP1	1.62816241569352e-13	0.282745217734358	0.39	0.407	3.91312554987781e-09	CTB 1	PWP1
NIPSNAP2	6.35721541744406e-13	0.270034678669213	0.307	0.298	1.52789315342851e-08	CTB 1	NIPSNAP2
SPG21	1.27309519050405e-12	0.252338706175586	0.256	0.238	3.05975698085743e-08	CTB 1	SPG21
RBM42	1.60601473333988e-12	0.251174096581895	0.349	0.349	3.85989581010907e-08	CTB 1	RBM42
YTHDF2	6.13658150138054e-12	0.250438591316372	0.434	0.466	1.4748659980418e-07	CTB 1	YTHDF2
CWC15	6.78644769378479e-12	0.252923429664556	0.39	0.409	1.63105483872424e-07	CTB 1	CWC15
DIAPH2	6.83946263851987e-12	0.25540355765486	0.328	0.327	1.64379645054187e-07	CTB 1	DIAPH2
LGMN	9.64483169313779e-12	0.307989946878518	0.429	0.462	2.31803884912874e-07	CTB 1	LGMN
FAM104A	2.31169693812425e-11	0.265938909177398	0.297	0.289	5.55593242108781e-07	CTB 1	FAM104A
KNOP1	1.00198785803243e-10	0.256709006344981	0.304	0.299	2.40817761799514e-06	CTB 1	KNOP1
LARP1B	1.3016931011123e-10	0.283556350926965	0.325	0.33	3.12848919921331e-06	CTB 1	LARP1B
MRPL33	4.38682742236441e-10	0.272300303510074	0.438	0.485	1.05433010269106e-05	CTB 1	MRPL33
ETFB	2.21817499565053e-09	0.25337746521331	0.411	0.451	5.33116178454649e-05	CTB 1	ETFB
CETN3	3.46333987492599e-09	0.270661166098233	0.303	0.304	8.32379105539712e-05	CTB 1	CETN3
REXO4	9.95516985870592e-09	0.252728205955578	0.266	0.261	0.000239262552384138	CTB 1	REXO4
NDUFA8	2.42577811436549e-08	0.25067580068725	0.325	0.338	0.000583011512006601	CTB 1	NDUFA8
PDHA1	8.28660276209675e-08	0.251434841875021	0.308	0.313	0.00199160210784233	CTB 1	PDHA1
SH3YL1	1.65851293151555e-05	0.265469579031758	0.39	0.435	0.398606997960447	CTB 1	SH3YL1
DCTN4	0.00110633179911428	0.252452193829023	0.324	0.353	1	CTB 1	DCTN4
CLU	0	1.24935720665536	0.849	0.431	0	CTB 2	CLU
CFD	0	0.981216132504275	0.422	0.11	0	CTB 2	CFD
HES1	0	0.893067622162974	0.772	0.451	0	CTB 2	HES1
PMAIP1	0	0.889790543808127	0.618	0.248	0	CTB 2	PMAIP1
RAB11FIP1	0	0.885527308193646	0.782	0.399	0	CTB 2	RAB11FIP1
FABP5	0	0.877382596803796	0.546	0.249	0	CTB 2	FABP5
TACSTD2	0	0.76458302940001	0.737	0.346	0	CTB 2	TACSTD2
NUPR1	0	0.748980918378091	0.66	0.307	0	CTB 2	NUPR1
BTG2	0	0.740445383678277	0.777	0.45	0	CTB 2	BTG2
FOLR1	0	0.709316030556007	0.749	0.491	0	CTB 2	FOLR1
TINAGL11	0	0.708228911490397	0.974	0.656	0	CTB 2	TINAGL1
BCAT1	0	0.698159812203495	0.694	0.394	0	CTB 2	BCAT1
CLDN4	0	0.678566059401938	0.923	0.827	0	CTB 2	CLDN4
WNT6	0	0.667176226713685	0.56	0.216	0	CTB 2	WNT6
ADGRL3	0	0.662571404320936	0.517	0.15	0	CTB 2	ADGRL3
DSC2	0	0.643898169616796	0.858	0.603	0	CTB 2	DSC2
DDIT31	0	0.629288172598072	0.632	0.339	0	CTB 2	DDIT3
CD241	0	0.628986197666577	0.817	0.431	0	CTB 2	CD24
PPDPF	0	0.624474552831045	0.698	0.431	0	CTB 2	PPDPF
IFI61	0	0.594549379389142	0.996	0.956	0	CTB 2	IFI6
KRAS	0	0.583557506530343	0.676	0.338	0	CTB 2	KRAS
PATJ	0	0.580139934776217	0.577	0.219	0	CTB 2	PATJ
CDO11	0	0.574224059838852	0.652	0.251	0	CTB 2	CDO1
SPINT11	0	0.559173976567955	0.911	0.578	0	CTB 2	SPINT1
PLAU	0	0.554933585769769	0.525	0.172	0	CTB 2	PLAU
ELF3	0	0.550073817965585	0.678	0.418	0	CTB 2	ELF3
PLA2G16	0	0.543963762759403	0.845	0.57	0	CTB 2	PLA2G16
CSF3R1	0	0.532529714051762	0.81	0.379	0	CTB 2	CSF3R
TFDP21	0	0.520105746704272	0.774	0.484	0	CTB 2	TFDP2
LAMB4	0	0.516151396539149	0.519	0.187	0	CTB 2	LAMB4
UBE2H	0	0.515522557428257	0.809	0.634	0	CTB 2	UBE2H
MORC41	0	0.513736493424176	0.881	0.66	0	CTB 2	MORC4
CLDN3	0	0.511528038401595	0.369	0.076	0	CTB 2	CLDN3
MUC151	0	0.503585609293086	0.61	0.283	0	CTB 2	MUC15
RCN1	0	0.501881854471252	0.832	0.6	0	CTB 2	RCN1
RARRES3	0	0.501726357392852	0.527	0.219	0	CTB 2	RARRES3
UBB	0	0.501499348154086	0.944	0.864	0	CTB 2	UBB
AGL1	0	0.501372731490828	0.654	0.334	0	CTB 2	AGL
CD99	0	0.501184034665536	0.812	0.594	0	CTB 2	CD99
GBP2	0	0.499873208470694	0.619	0.292	0	CTB 2	GBP2
H3F3B	0	0.494966754843162	0.979	0.949	0	CTB 2	H3F3B
SMPDL3A	0	0.493922116745652	0.594	0.269	0	CTB 2	SMPDL3A
KRT23	0	0.491524880209208	0.772	0.477	0	CTB 2	KRT23
LRP21	0	0.487143740256429	0.508	0.213	0	CTB 2	LRP2
BTG11	0	0.485542518112263	0.937	0.784	0	CTB 2	BTG1
PDLIM11	0	0.483596319720816	0.757	0.426	0	CTB 2	PDLIM1
ATG9B	0	0.481664020848171	0.439	0.115	0	CTB 2	ATG9B
NUDT41	0	0.48125050265264	0.666	0.355	0	CTB 2	NUDT4
ATP2B4	0	0.474995417346631	0.641	0.313	0	CTB 2	ATP2B4
SCCPDH	0	0.46720231604849	0.523	0.248	0	CTB 2	SCCPDH
DAB21	0	0.457105638806028	0.65	0.278	0	CTB 2	DAB2
CLIP1	0	0.449542712943714	0.805	0.569	0	CTB 2	CLIP1
XAGE31	0	0.448526302683124	0.969	0.785	0	CTB 2	XAGE3
CAST	0	0.443889728004391	0.911	0.79	0	CTB 2	CAST
KRT18	0	0.432813482380926	1	0.998	0	CTB 2	KRT18
UTRN1	0	0.432056548156351	0.655	0.324	0	CTB 2	UTRN
ATP6V1C21	0	0.429528744971834	0.483	0.162	0	CTB 2	ATP6V1C2
FOXO41	0	0.426827145301287	0.701	0.364	0	CTB 2	FOXO4
RIPOR2	0	0.421651095945703	0.355	0.091	0	CTB 2	RIPOR2
ARHGAP181	0	0.410754502006266	0.592	0.288	0	CTB 2	ARHGAP18
CMYA5	0	0.40685756295634	0.399	0.14	0	CTB 2	CMYA5
ANXA1	0	0.405632081495386	0.99	0.966	0	CTB 2	ANXA1
S100A10	0	0.385999445837021	0.981	0.903	0	CTB 2	S100A10
P2RY61	0	0.383304484288399	0.477	0.203	0	CTB 2	P2RY6
PDGFA	0	0.38141527624756	0.463	0.195	0	CTB 2	PDGFA
SLC7A4	0	0.37218541680491	0.3	0.061	0	CTB 2	SLC7A4
STS1	0	0.36857020682733	0.456	0.182	0	CTB 2	STS
EPS8	0	0.367104231264357	0.45	0.18	0	CTB 2	EPS8
SLC7A8	0	0.365813234706716	0.352	0.099	0	CTB 2	SLC7A8
GLDC1	0	0.365081696260088	0.542	0.249	0	CTB 2	GLDC
GPRC5B	0	0.346710844549411	0.276	0.047	0	CTB 2	GPRC5B
PAGE41	0	0.318840880186756	0.896	0.498	0	CTB 2	PAGE4
PIK3IP1	0	0.303533485761742	0.313	0.095	0	CTB 2	PIK3IP1
SIGIRR	0	0.272949078713952	0.257	0.065	0	CTB 2	SIGIRR
MXRA8	6.42821413711257e-308	0.577199915486719	0.604	0.35	1.54495698571364e-303	CTB 2	MXRA8
APMAP1	1.14545667635419e-306	0.372548458370717	0.515	0.227	2.75299057594965e-302	CTB 2	APMAP
ITGB4	2.513945612486e-306	0.430314452149164	0.746	0.442	6.04201688504886e-302	CTB 2	ITGB4
NLRP2	8.80995730510424e-306	0.632285096907465	0.693	0.492	2.11738513870875e-301	CTB 2	NLRP2
SLC40A11	1.44641342956089e-302	0.310676660580387	0.651	0.3	3.47631003660665e-298	CTB 2	SLC40A1
DEPP1	3.14616841175772e-302	0.42268195586342	0.52	0.236	7.56150116081851e-298	CTB 2	DEPP1
SIGLEC6	5.63858383610386e-302	0.370957572319643	0.456	0.188	1.3551772391692e-297	CTB 2	SIGLEC6
PERP	2.03677672960853e-300	0.372620472898444	0.94	0.852	4.89518919194114e-296	CTB 2	PERP
PPP1R9A	1.45929401515326e-298	0.320067907118902	0.369	0.133	3.50726723601934e-294	CTB 2	PPP1R9A
MET1	7.26545135035479e-298	0.432062827293069	0.686	0.381	1.74617857754427e-293	CTB 2	MET
DNAJB1	2.94903222013663e-297	0.532141336732515	0.85	0.689	7.08770403787638e-293	CTB 2	DNAJB1
LRPAP11	1.15765599851383e-294	0.422539984358331	0.897	0.758	2.78231042682813e-290	CTB 2	LRPAP1
ITGB6	1.38521362293967e-294	0.365634217307202	0.44	0.178	3.32922242137321e-290	CTB 2	ITGB6
EGFR1	1.40063267820749e-294	0.451008745844787	0.944	0.831	3.36628057880389e-290	CTB 2	EGFR
AFAP1L2	3.26274426599853e-294	0.299791816559787	0.349	0.122	7.84167956890087e-290	CTB 2	AFAP1L2
BIRC7	9.91600817876019e-292	0.554283547024303	0.545	0.27	2.38321340568322e-287	CTB 2	BIRC7
CD471	1.1437280883844e-289	0.418596338036758	0.698	0.431	2.74883608762306e-285	CTB 2	CD47
EIF4A2	4.934098386991e-287	0.434271832011029	0.843	0.698	1.18586120632942e-282	CTB 2	EIF4A2
CPVL	6.82672273647468e-287	0.471418460138057	0.835	0.66	1.64073454248432e-282	CTB 2	CPVL
KIAA1217	3.99452736323823e-285	0.397903608988143	0.584	0.306	9.60044706480677e-281	CTB 2	KIAA1217
CNN31	3.27315854439623e-283	0.378760078309819	0.596	0.301	7.86670924560191e-279	CTB 2	CNN3
DOCK9	3.02442725693251e-280	0.407819369353576	0.581	0.314	7.26890846931159e-276	CTB 2	DOCK9
CYB5R1	7.37283989228398e-280	0.457093538221761	0.797	0.612	1.77198833971153e-275	CTB 2	CYB5R1
CCNL1	4.57070444665357e-277	0.455685010177976	0.833	0.675	1.09852310670872e-272	CTB 2	CCNL1
S100A16	1.38993218087561e-274	0.441283527589857	0.614	0.311	3.34056300351645e-270	CTB 2	S100A16
ITGA2	3.48276188137844e-274	0.414481583309555	0.494	0.22	8.37046990570494e-270	CTB 2	ITGA2
HSP90AA1	5.21260874989155e-274	0.369485134718844	0.991	0.979	1.25279838694893e-269	CTB 2	HSP90AA1
SERTAD1	1.73609766701631e-273	0.623268628655857	0.699	0.515	4.172537132907e-269	CTB 2	SERTAD1
NRK1	4.44311812686532e-273	0.420625919554092	0.704	0.421	1.06785901061081e-268	CTB 2	NRK
SPOPL	2.03655713313135e-270	0.365874513557936	0.386	0.158	4.89466141376789e-266	CTB 2	SPOPL
RAB311	3.51678494745597e-267	0.381350243454451	0.576	0.296	8.45224094271568e-263	CTB 2	RAB31
DSP	2.25673250308446e-266	0.362492083463164	0.961	0.901	5.4238308979132e-262	CTB 2	DSP
TBL1X1	3.3752020483293e-266	0.363244478146024	0.503	0.228	8.11196060295464e-262	CTB 2	TBL1X
CLTA1	1.55150743470394e-265	0.351349876102398	0.919	0.812	3.72889296856744e-261	CTB 2	CLTA
DDX51	3.39929538904314e-265	0.37257948105602	0.955	0.918	8.16986653802627e-261	CTB 2	DDX5
CXCL2	5.61191120018671e-265	0.771579672155158	0.343	0.131	1.34876673785287e-260	CTB 2	CXCL2
UCA1	7.02332844448038e-264	0.436747830997299	0.515	0.259	1.68798675834641e-259	CTB 2	UCA1
JUN	1.38449154751449e-263	0.421506061349062	0.922	0.728	3.32748698529633e-259	CTB 2	JUN
SLC38A91	1.18810036730872e-260	0.402990285782742	0.567	0.309	2.85548042278978e-256	CTB 2	SLC38A9
FNBP1L	9.69790737784661e-259	0.425906040478165	0.72	0.501	2.33079505919165e-254	CTB 2	FNBP1L
APLP21	1.68687663075613e-258	0.351819837805289	0.911	0.691	4.05423929435927e-254	CTB 2	APLP2
AGR3	7.76790917089888e-257	0.451124913865699	0.268	0.085	1.86693929013384e-252	CTB 2	AGR3
MTUS1	5.90318253352847e-256	0.356493828590952	0.529	0.268	1.41877089010823e-251	CTB 2	MTUS1
SEMA6A1	1.82090027118018e-254	0.348737086219352	0.537	0.255	4.37635171175445e-250	CTB 2	SEMA6A
RASA1	2.91369990033032e-254	0.432235589082498	0.832	0.695	7.00278634045389e-250	CTB 2	RASA1
HSP90AB1	9.49230963391157e-254	0.321329727333615	0.973	0.95	2.28138169741431e-249	CTB 2	HSP90AB1
NEDD4L	1.06484383761824e-251	0.337710698228244	0.468	0.217	2.55924567933169e-247	CTB 2	NEDD4L
VIT	2.18375989460832e-250	0.353338855888376	0.507	0.237	5.24844853070163e-246	CTB 2	VIT
IFITM3	3.1133176107207e-249	0.579584142190485	0.808	0.716	7.48254754560614e-245	CTB 2	IFITM3
ABLIM1	3.52300545167243e-246	0.326244325522986	0.382	0.159	8.46719130254952e-242	CTB 2	ABLIM1
THSD7A	4.94318688467302e-246	0.400789598828607	0.39	0.168	1.18804553586231e-241	CTB 2	THSD7A
CLDN6	1.59761997710392e-240	0.311244830621424	0.337	0.128	3.83971985297156e-236	CTB 2	CLDN6
TOB1	1.75786696856269e-237	0.320477516504067	0.396	0.168	4.22485747224357e-233	CTB 2	TOB1
LY6E	3.90009851167451e-237	0.347077134644238	0.946	0.844	9.37349676295852e-233	CTB 2	LY6E
YAP1	1.55120900210083e-236	0.36620646085633	0.722	0.472	3.72817571564913e-232	CTB 2	YAP1
INTS6	1.15076390852481e-234	0.51041663419899	0.731	0.538	2.76574597774853e-230	CTB 2	INTS6
RAB11A	3.62246020143025e-230	0.379148732701751	0.772	0.595	8.70622084811747e-226	CTB 2	RAB11A
DNMT11	7.61579061914461e-230	0.356468343580836	0.791	0.55	1.83037911740522e-225	CTB 2	DNMT1
RETREG11	3.82345211982893e-229	0.325279382939996	0.348	0.139	9.18928482479685e-225	CTB 2	RETREG1
PPFIBP1	9.62552661586048e-229	0.376382182780281	0.665	0.419	2.31339906685591e-224	CTB 2	PPFIBP1
MYO6	9.29498315802155e-228	0.422932089103037	0.552	0.328	2.2339562521989e-223	CTB 2	MYO6
NR2F21	2.29213501394018e-227	0.354397849475518	0.632	0.368	5.50891729250382e-223	CTB 2	NR2F2
ISYNA11	1.575538800094e-226	0.282973510530889	0.734	0.424	3.78664995214593e-222	CTB 2	ISYNA1
LYPD3	1.63911010553585e-225	0.359540004502909	0.48	0.246	3.93943722764485e-221	CTB 2	LYPD3
MDK	4.07894457864781e-225	0.499857348464947	0.577	0.35	9.80333540032215e-221	CTB 2	MDK
SPTBN1	6.64285629102147e-223	0.398221752554045	0.548	0.312	1.5965440809841e-218	CTB 2	SPTBN1
MME	7.70960352217203e-223	0.354360367159088	0.825	0.556	1.85292611051882e-218	CTB 2	MME
IGF1R	8.38098490423377e-223	0.365458856017397	0.649	0.396	2.01428591188354e-218	CTB 2	IGF1R
MYL12B	9.73314803932882e-223	0.300130569161323	0.934	0.9	2.33926479977229e-218	CTB 2	MYL12B
MLLT11	4.07118277396808e-222	0.255706603886575	0.656	0.36	9.7846806789549e-218	CTB 2	MLLT1
TUT4	2.17287962208716e-220	0.384651870339416	0.692	0.478	5.22229888372429e-216	CTB 2	TUT4
SH2D4A1	1.6237275788227e-219	0.287966004674973	0.41	0.183	3.90246686294247e-215	CTB 2	SH2D4A
ITGA61	8.10785424726259e-219	0.390768831656495	0.809	0.589	1.94864168978709e-214	CTB 2	ITGA6
CRIM1	1.65557994757396e-214	0.364062499362479	0.851	0.693	3.97902084599926e-210	CTB 2	CRIM1
VWA11	2.92646965302399e-214	0.341895097361546	0.742	0.516	7.03347716407785e-210	CTB 2	VWA1
ZFP36	9.22532630083625e-214	0.522955326710139	0.677	0.486	2.21721492314298e-209	CTB 2	ZFP36
VAMP81	3.68805594043502e-213	0.309181862559712	0.926	0.855	8.86387364724152e-209	CTB 2	VAMP8
ERVH48-11	4.36964790896787e-213	0.341284273615365	0.677	0.416	1.05020117844134e-208	CTB 2	ERVH48-1
NLRP7	8.17045072661343e-213	0.275339303436358	0.262	0.091	1.96368612763427e-208	CTB 2	NLRP7
CEMIP2	1.07294835137976e-212	0.345001518700941	0.644	0.406	2.57872406770611e-208	CTB 2	CEMIP2
TGM2	2.53260810241001e-212	0.262919442413466	0.861	0.552	6.08687031333223e-208	CTB 2	TGM2
FXYD31	1.38991569619406e-210	0.263969859774406	0.705	0.43	3.34052338423279e-206	CTB 2	FXYD3
NEAT1	4.1414878643794e-209	0.386917582048619	0.984	0.956	9.95365193324945e-205	CTB 2	NEAT1
CARHSP1	5.68688752731646e-209	0.415152340562235	0.737	0.573	1.36678654831524e-204	CTB 2	CARHSP1
MAST4	2.52016704752889e-208	0.36801482063671	0.628	0.401	6.05696948203094e-204	CTB 2	MAST4
EML41	3.1069304393446e-207	0.358203504440914	0.638	0.402	7.4671966179208e-203	CTB 2	EML4
GLUL	8.49003095941488e-206	0.376633912977093	0.676	0.464	2.04049404078577e-201	CTB 2	GLUL
KCNN41	1.48164064408885e-205	0.274122545736156	0.494	0.243	3.56097512400314e-201	CTB 2	KCNN4
TKT1	1.68681828292166e-205	0.344438969566111	0.734	0.495	4.05409906117392e-201	CTB 2	TKT
ENC1	1.96657491670092e-205	0.335184684582993	0.404	0.193	4.72646615479899e-201	CTB 2	ENC1
SOX15	2.74830264068214e-204	0.260728643384227	0.284	0.106	6.60527056661544e-200	CTB 2	SOX15
RBM47	3.11647477624133e-204	0.36990378398287	0.696	0.501	7.49013547721841e-200	CTB 2	RBM47
UBAC11	3.16643365310419e-203	0.30768273719259	0.593	0.349	7.6102066418706e-199	CTB 2	UBAC1
F51	5.86817793504147e-203	0.450992292471399	0.5	0.247	1.41035788490787e-198	CTB 2	F5
JUNB	5.80735176922986e-202	0.521534741075514	0.822	0.724	1.3957389242167e-197	CTB 2	JUNB
PARD6B	2.59032088323106e-201	0.320841104480002	0.454	0.234	6.22557721075753e-197	CTB 2	PARD6B
HSPA1B	1.87385152154961e-200	0.4272897080461	0.705	0.482	4.50361474689233e-196	CTB 2	HSPA1B
NECTIN2	1.91985453228957e-200	0.401589051890084	0.639	0.435	4.61417838290475e-196	CTB 2	NECTIN2
ATF3	2.32864164681285e-200	0.463767972357636	0.9	0.855	5.59665733395001e-196	CTB 2	ATF3
EFNA1	2.88162880055117e-200	0.448834899265111	0.822	0.678	6.92570665924468e-196	CTB 2	EFNA1
TENM31	4.23377803341817e-199	0.347552170067271	0.607	0.366	1.01754621255172e-194	CTB 2	TENM3
CCNDBP11	6.57510709020459e-199	0.315229330859513	0.677	0.436	1.58026123805977e-194	CTB 2	CCNDBP1
SOX13	1.21939076162456e-198	0.294716175338506	0.365	0.169	2.93068375648846e-194	CTB 2	SOX13
CADM11	4.96839905294296e-198	0.315051422239232	0.39	0.175	1.19410502838431e-193	CTB 2	CADM1
SMARCA1	7.87259872031604e-198	0.368729609216905	0.706	0.504	1.89210037644076e-193	CTB 2	SMARCA1
TSC22D1	7.21948017947544e-197	0.36827621380939	0.9	0.835	1.73512986633513e-192	CTB 2	TSC22D1
AMOT	3.20376471888895e-196	0.333811293192559	0.539	0.309	7.69992812537771e-192	CTB 2	AMOT
KTN1	8.23321005509018e-196	0.331653702706376	0.901	0.84	1.97876970464037e-191	CTB 2	KTN1
CBR1	2.36921621642576e-193	0.411882344602994	0.483	0.279	5.69417425455767e-189	CTB 2	CBR1
SPINT21	8.00247676944726e-193	0.289897638609489	0.95	0.843	1.92331526676896e-188	CTB 2	SPINT2
GTF2I	2.40179464142017e-191	0.319785125339061	0.773	0.578	5.77247324118924e-187	CTB 2	GTF2I
GALNT18	4.91585353208692e-191	0.253831682502969	0.296	0.116	1.18147623790177e-186	CTB 2	GALNT18
C9orf3	2.16795265260486e-189	0.278944743230371	0.399	0.195	5.21045740527052e-185	CTB 2	C9orf3
ADAM8	1.31362755637657e-188	0.258782381828055	0.292	0.116	3.15717246899544e-184	CTB 2	ADAM8
PHLDA3	1.02755548384301e-187	0.325378102483852	0.571	0.339	2.46962684986829e-183	CTB 2	PHLDA3
NEDD9	8.34591676380526e-187	0.352880561721881	0.661	0.442	2.00585763501296e-182	CTB 2	NEDD9
GREB1L	1.73066875449424e-186	0.254839172111028	0.333	0.146	4.15948928455146e-182	CTB 2	GREB1L
SAP18	2.90224058160301e-185	0.309256419744168	0.855	0.756	6.97524501382468e-181	CTB 2	SAP18
FERMT1	2.9773225030729e-185	0.282717489827586	0.499	0.27	7.1556969038854e-181	CTB 2	FERMT1
CALM1	7.4501806488195e-185	0.30155047631517	0.922	0.884	1.79057641713728e-180	CTB 2	CALM1
SRSF5	9.18391064627168e-184	0.33637394991098	0.837	0.741	2.20726108472494e-179	CTB 2	SRSF5
CST31	1.36595355545743e-183	0.325259037255442	0.836	0.635	3.28293277518638e-179	CTB 2	CST3
NABP1	1.06138481448445e-182	0.334813193453023	0.622	0.404	2.55093226313192e-178	CTB 2	NABP1
SLC11A2	3.52327218256213e-182	0.323278324878153	0.454	0.247	8.46783236356982e-178	CTB 2	SLC11A2
BBX	5.48576372716933e-182	0.35524578237184	0.759	0.601	1.31844845418788e-177	CTB 2	BBX
AHNAK	7.38059987515142e-182	0.296012232610035	0.944	0.872	1.77385337399389e-177	CTB 2	AHNAK
WSB1	2.04253996872219e-180	0.31559348583691	0.904	0.823	4.90904056082692e-176	CTB 2	WSB1
PPP1R15A	9.52635153957487e-180	0.445400099351715	0.835	0.76	2.28956332902142e-175	CTB 2	PPP1R15A
EEA1	2.47266472035574e-179	0.319262838035658	0.658	0.436	5.94280238890299e-175	CTB 2	EEA1
DNAJA1	3.36999709019794e-178	0.332848662104104	0.926	0.883	8.09945100658173e-174	CTB 2	DNAJA1
BHLHE40	6.04966086508534e-178	0.312092080075381	0.511	0.293	1.45397549231461e-173	CTB 2	BHLHE40
PNRC11	6.94334700776883e-177	0.331325097848629	0.768	0.6	1.66876401984716e-172	CTB 2	PNRC1
COX7C1	1.72257632066759e-176	0.254665344164898	0.929	0.862	4.14003992909248e-172	CTB 2	COX7C
NPEPPS	2.04073212572669e-176	0.353012142099961	0.684	0.511	4.90469559097153e-172	CTB 2	NPEPPS
ADGRG11	4.39447378974596e-176	0.298217007895702	0.628	0.366	1.05616783062754e-171	CTB 2	ADGRG1
PLEC	1.11398274618061e-175	0.341414043640715	0.659	0.444	2.67734613217047e-171	CTB 2	PLEC
CASP41	1.88066027167903e-175	0.302521469061499	0.653	0.411	4.51997889695339e-171	CTB 2	CASP4
SNX2	1.62396178590811e-174	0.358095627551701	0.715	0.552	3.90302975625155e-170	CTB 2	SNX2
BAMBI	2.1392768808224e-174	0.432243556689285	0.424	0.239	5.14153805536855e-170	CTB 2	BAMBI
DPP41	9.81032603569752e-174	0.312133252857874	0.796	0.583	2.35781375941954e-169	CTB 2	DPP4
PDZD2	4.57262719549969e-173	0.27355208660321	0.421	0.216	1.0989852201664e-168	CTB 2	PDZD2
USP531	4.58067572007489e-173	0.315614228588466	0.711	0.504	1.1009196025628e-168	CTB 2	USP53
TUBB4B	1.85318811896478e-172	0.328783953025378	0.838	0.728	4.45395232511996e-168	CTB 2	TUBB4B
PTS	1.97474285704329e-172	0.384804543381028	0.611	0.432	4.74609698261785e-168	CTB 2	PTS
CAPS	2.17223998788617e-172	0.290877813560082	0.359	0.173	5.22076158688562e-168	CTB 2	CAPS
CALM2	2.47487097730698e-171	0.285956167603759	0.895	0.784	5.9481049068596e-167	CTB 2	CALM2
CSPP1	1.83356472351427e-170	0.352140849451777	0.537	0.342	4.4067894564942e-166	CTB 2	CSPP1
TMSB4X	2.51924620858607e-170	0.458936453349624	0.613	0.405	6.05475633771576e-166	CTB 2	TMSB4X
IER3	2.71537350202169e-169	0.392081481104312	0.48	0.278	6.52612867475892e-165	CTB 2	IER3
DYNLRB1	6.28224699062423e-169	0.310225565363957	0.809	0.686	1.50987524172663e-164	CTB 2	DYNLRB1
CCDC6	1.51624428239016e-168	0.315040494806215	0.51	0.31	3.64414150829651e-164	CTB 2	CCDC6
PFKP	3.00537227414186e-168	0.320077447130686	0.502	0.289	7.22311172367254e-164	CTB 2	PFKP
TNRC18	6.75642102217178e-166	0.32700745352931	0.441	0.247	1.62383822846877e-161	CTB 2	TNRC18
NFKBIA	9.27152652000589e-166	0.580052561875883	0.81	0.712	2.22831868381822e-161	CTB 2	NFKBIA
IRF1	3.50401311421337e-163	0.459249656174676	0.673	0.522	8.4215451187004e-159	CTB 2	IRF1
SPTSSA	3.68057426271184e-163	0.354476286204203	0.627	0.445	8.84589218300164e-159	CTB 2	SPTSSA
ACP5	7.08352326066058e-161	0.29445091166049	0.309	0.141	1.70245398046716e-156	CTB 2	ACP5
CLDN7	2.53231381886107e-160	0.411432510682106	0.737	0.628	6.08616303225069e-156	CTB 2	CLDN7
IFRD1	4.25996603325851e-160	0.339958996179362	0.621	0.436	1.02384023643335e-155	CTB 2	IFRD1
TPD52	2.56922560860084e-159	0.284192633441599	0.524	0.317	6.17487682771126e-155	CTB 2	TPD52
ARHGAP29	5.74752112331556e-158	0.322588439734138	0.647	0.442	1.38135922677766e-153	CTB 2	ARHGAP29
SLC44A2	6.98227178250876e-158	0.337473607337287	0.716	0.565	1.67811920020815e-153	CTB 2	SLC44A2
KLF4	3.58964082911619e-157	0.426800438534758	0.778	0.657	8.62734276869784e-153	CTB 2	KLF4
MIR22HG	6.28233282835671e-156	0.338121667201188	0.528	0.337	1.50989587196725e-151	CTB 2	MIR22HG
HACD31	5.30341275489942e-155	0.280044399832069	0.58	0.361	1.27462222151253e-150	CTB 2	HACD3
RAB25	1.90754910442042e-154	0.297171739614549	0.539	0.332	4.58460351756403e-150	CTB 2	RAB25
RBM39	4.40771077413792e-154	0.271295662829441	0.872	0.785	1.05934920745631e-149	CTB 2	RBM39
CDH11	9.97041352710482e-154	0.305046415047316	0.701	0.502	2.39628918710437e-149	CTB 2	CDH1
ABHD11	1.08344056137254e-153	0.272118036592925	0.402	0.22	2.60394104520277e-149	CTB 2	ABHD11
LEPROT	5.21973458179708e-153	0.300059769065651	0.816	0.733	1.25451100938911e-148	CTB 2	LEPROT
FAM89A1	1.82388047876079e-152	0.271427015183798	0.701	0.474	4.38351434265369e-148	CTB 2	FAM89A
RFK	4.39201047332637e-152	0.35621522851161	0.701	0.542	1.05557579715926e-147	CTB 2	RFK
SLC7A2	4.8770144561899e-152	0.267373443813225	0.343	0.169	1.17214165440068e-147	CTB 2	SLC7A2
RTN4	4.23582390297727e-151	0.287110422416335	0.904	0.864	1.01803791684156e-146	CTB 2	RTN4
SRSF3	5.13013027387598e-149	0.297884725219236	0.857	0.794	1.23297551002335e-144	CTB 2	SRSF3
ZNF431	6.45580330767528e-149	0.289443293036237	0.497	0.302	1.55158776696668e-144	CTB 2	ZNF431
S100P	1.68412934392673e-148	0.320886634754145	0.949	0.886	4.04763646519351e-144	CTB 2	S100P
SQSTM1	2.47364787579485e-148	0.285692913494449	0.887	0.818	5.94516530468534e-144	CTB 2	SQSTM1
GTF2B	3.067345407878e-147	0.306938503521467	0.518	0.334	7.37205795329398e-143	CTB 2	GTF2B
CAPN1	1.49472485132272e-146	0.275117013273572	0.704	0.527	3.59242170766903e-142	CTB 2	CAPN1
SRSF2	1.17115057157184e-145	0.303746808125986	0.777	0.659	2.81474328371576e-141	CTB 2	SRSF2
ITPR2	1.19236659108559e-145	0.374666662701732	0.643	0.488	2.8657338650151e-141	CTB 2	ITPR2
PEG31	7.62763578969319e-145	0.28734084792247	0.86	0.653	1.83322598569486e-140	CTB 2	PEG3
TFRC1	9.60668071477824e-145	0.269259868462658	0.636	0.414	2.3088696429898e-140	CTB 2	TFRC
DEGS11	5.36330432354265e-144	0.267122846622367	0.689	0.47	1.28901656112024e-139	CTB 2	DEGS1
SLC2A3	5.86850531557255e-144	0.345907640799845	0.623	0.418	1.41043656754471e-139	CTB 2	SLC2A3
EXTL21	3.30926707717025e-143	0.257170157075258	0.451	0.256	7.95349249327098e-139	CTB 2	EXTL2
TLE41	2.04497607607218e-142	0.321134711960804	0.709	0.541	4.91489550123188e-138	CTB 2	TLE4
AP1M2	2.96995936531733e-142	0.258440855004564	0.473	0.283	7.13800033860367e-138	CTB 2	AP1M2
CYB5A1	7.94000018104315e-141	0.293670164411884	0.63	0.451	1.90829964351191e-136	CTB 2	CYB5A
RSRP1	2.50022778441034e-140	0.324118240061968	0.673	0.517	6.00904745705181e-136	CTB 2	RSRP1
KRT8	3.64651750429537e-140	0.26454066187158	0.998	0.993	8.7640401698235e-136	CTB 2	KRT8
PPP1R101	1.02666071645477e-139	0.312810419771146	0.636	0.461	2.46747636592739e-135	CTB 2	PPP1R10
MYOF	1.25567212999612e-139	0.285564830120231	0.853	0.746	3.01788239723268e-135	CTB 2	MYOF
PRKAB2	1.31557358912253e-139	0.27335175389636	0.443	0.26	3.16184956409708e-135	CTB 2	PRKAB2
COL3A1	8.47694408036878e-139	0.288918484376181	0.423	0.231	2.03734874027583e-134	CTB 2	COL3A1
MVP	2.26424949332826e-138	0.291030780219115	0.554	0.374	5.44189723226514e-134	CTB 2	MVP
FAM53C	5.82418940522057e-136	0.319138162073163	0.529	0.349	1.39978568165071e-131	CTB 2	FAM53C
CLIC1	1.24164050320367e-135	0.255702166595973	0.876	0.81	2.9841587853997e-131	CTB 2	CLIC1
MCL1	6.30191553307454e-135	0.300049641531199	0.83	0.738	1.51460237921913e-130	CTB 2	MCL1
COMMD7	8.51025476746943e-135	0.281439131817694	0.624	0.453	2.0453546308136e-130	CTB 2	COMMD7
TRAF4	9.5446026784471e-135	0.263128587848431	0.529	0.34	2.29394980773798e-130	CTB 2	TRAF4
GABARAPL11	7.25600248702991e-134	0.263770359228291	0.717	0.537	1.74390763773277e-129	CTB 2	GABARAPL1
MPDZ	3.77633912760614e-131	0.256268178623333	0.457	0.276	9.0760534592886e-127	CTB 2	MPDZ
RPS4Y1	1.1066927427826e-130	0.313177819444053	0.686	0.486	2.65982533800369e-126	CTB 2	RPS4Y1
KCNQ1OT1	1.34970156858284e-130	0.407180279950755	0.796	0.683	3.24387274993201e-126	CTB 2	KCNQ1OT1
BRD2	1.72769154003666e-129	0.3203338404538	0.829	0.74	4.15233384732411e-125	CTB 2	BRD2
SOCS3	1.76765560596517e-128	0.406360013807092	0.639	0.485	4.24838348337668e-124	CTB 2	SOCS3
SFPQ	1.22500932735175e-127	0.268826194690766	0.824	0.733	2.9441874173572e-123	CTB 2	SFPQ
SPTAN1	3.67774773229084e-127	0.264963249602199	0.487	0.308	8.8390988997878e-123	CTB 2	SPTAN1
TCIM	9.00579311090143e-127	0.285435421345626	0.673	0.487	2.16445231627405e-122	CTB 2	TCIM
THUMPD3-AS1	7.24566276873e-126	0.3097046592161	0.467	0.294	1.74142258983657e-121	CTB 2	THUMPD3-AS1
MYLIP	1.74292294194464e-124	0.35953980644286	0.66	0.521	4.18894099866974e-120	CTB 2	MYLIP
LIMK2	1.85634111964911e-124	0.258861448861451	0.545	0.361	4.46153024696468e-120	CTB 2	LIMK2
VPS28	5.5678940614275e-124	0.274583027626261	0.687	0.549	1.33818765872349e-119	CTB 2	VPS28
NFE2L21	1.49199771093814e-123	0.261478917601598	0.663	0.488	3.58586729846871e-119	CTB 2	NFE2L2
KDM4B	2.90116600529682e-121	0.260829318195926	0.509	0.34	6.97266237713038e-117	CTB 2	KDM4B
WASF2	2.935805596765e-120	0.261280401867326	0.776	0.644	7.05591517126501e-116	CTB 2	WASF2
HSPA2	1.9343572830216e-119	0.284854543526045	0.651	0.471	4.64903429401411e-115	CTB 2	HSPA2
BASP1	3.3728607027267e-119	0.250310670611735	0.916	0.903	8.10633341293335e-115	CTB 2	BASP1
SLC3A2	2.45088221044224e-117	0.276468666080548	0.705	0.556	5.89045030457687e-113	CTB 2	SLC3A2
GADD45A	1.49055014556235e-116	0.319914425664451	0.651	0.482	3.58238821984456e-112	CTB 2	GADD45A
SOCS1	4.23802282552218e-116	0.270502585603233	0.406	0.241	1.018566405886e-111	CTB 2	SOCS1
RNF213	2.26430513474471e-115	0.304609021839315	0.626	0.492	5.44203096084542e-111	CTB 2	RNF213
IFIT3	6.49640495966381e-115	0.910607168496885	0.415	0.262	1.5613459680056e-110	CTB 2	IFIT3
SERPINB9	1.4766419443466e-114	0.295668022636517	0.602	0.446	3.54896124904262e-110	CTB 2	SERPINB9
FTL	1.6728245778307e-114	0.441888357003679	0.941	0.935	4.0204665903583e-110	CTB 2	FTL
ITPRIPL2	1.30543555335785e-113	0.311789795323093	0.533	0.374	3.13748380894025e-109	CTB 2	ITPRIPL2
SKIL	5.08412155932723e-112	0.330733445143287	0.536	0.377	1.22191777556871e-107	CTB 2	SKIL
EDNRB	5.71676571621603e-112	0.259103289472186	0.477	0.311	1.37396747223536e-107	CTB 2	EDNRB
SERPINB1	7.88991116263284e-112	0.282234483717508	0.61	0.469	1.89626124882718e-107	CTB 2	SERPINB1
MSRB1	9.26912430794979e-108	0.255661025346614	0.432	0.277	2.22774133617265e-103	CTB 2	MSRB1
RABGAP1L	3.58241787501245e-106	0.277559383945706	0.481	0.328	8.60998312080491e-102	CTB 2	RABGAP1L
TACC1	2.68117262528655e-104	0.279406630955303	0.758	0.644	6.44393028761368e-100	CTB 2	TACC1
SPAG9	1.01155575027596e-103	0.263861600826514	0.584	0.436	2.43117309021325e-99	CTB 2	SPAG9
SUCO	9.2803185718093e-103	0.253206740121591	0.573	0.419	2.23043176554865e-98	CTB 2	SUCO
IER2	5.07655138368854e-102	0.290900899398534	0.919	0.894	1.2200983595557e-97	CTB 2	IER2
DPP7	1.60050410620359e-101	0.26791405651831	0.518	0.354	3.84665156884971e-97	CTB 2	DPP7
TRA2A1	1.56138869020024e-98	0.264990952898966	0.604	0.456	3.75264157802727e-94	CTB 2	TRA2A
TNFRSF12A	2.03882029988887e-98	0.273742768463449	0.651	0.497	4.90010070875291e-94	CTB 2	TNFRSF12A
IFIT1	3.5752582746386e-97	0.399123856546608	0.383	0.235	8.5927757372664e-93	CTB 2	IFIT1
FEZ2	6.78673733468769e-97	0.250513196464807	0.531	0.39	1.63112445101884e-92	CTB 2	FEZ2
HSPA1A	1.76535747063652e-96	0.456593294029493	0.607	0.47	4.24286014492782e-92	CTB 2	HSPA1A
RBBP6	3.36880085574437e-96	0.278810849244567	0.609	0.467	8.09657597669602e-92	CTB 2	RBBP6
CST6	8.02269744220125e-91	0.291528701212386	0.674	0.541	1.92817510325865e-86	CTB 2	CST6
MAFF	9.74369168979016e-90	0.314798964989648	0.649	0.54	2.34179886072417e-85	CTB 2	MAFF
MDM2	6.65347748721448e-83	0.263107096263973	0.543	0.403	1.59909677927713e-78	CTB 2	MDM2
STAT3	6.23048417570808e-82	0.254154841983205	0.572	0.449	1.49743456678968e-77	CTB 2	STAT3
GADD45B	1.59065040877129e-80	0.324707052836408	0.647	0.533	3.82296919244091e-76	CTB 2	GADD45B
ZNF292	2.20353978763128e-80	0.274658355097088	0.651	0.544	5.29598752559302e-76	CTB 2	ZNF292
INSR	6.67702847327093e-77	0.250718073720894	0.49	0.364	1.60475702326593e-72	CTB 2	INSR
RPL36A	3.53654736704145e-76	0.27787997688045	0.63	0.502	8.49973794194743e-72	CTB 2	RPL36A
HSPA5	2.3757265441324e-66	0.255210398650418	0.91	0.885	5.70982117616782e-62	CTB 2	HSPA5
JUN1	0	0.905502503758251	0.918	0.734	0	CTB 3	JUN
EGLN3	0	0.900455491716586	0.899	0.613	0	CTB 3	EGLN3
SLC2A31	0	0.885164543517162	0.803	0.404	0	CTB 3	SLC2A3
TCIM1	0	0.882239969084995	0.818	0.476	0	CTB 3	TCIM
MARCKS	0	0.780200186560283	0.787	0.459	0	CTB 3	MARCKS
PPDPF1	0	0.74975746980358	0.774	0.43	0	CTB 3	PPDPF
FTL1	0	0.74590614041808	0.972	0.932	0	CTB 3	FTL
TNNT3	0	0.686794621339385	0.657	0.274	0	CTB 3	TNNT3
DSP1	0	0.662896703614563	0.967	0.902	0	CTB 3	DSP
DSC3	0	0.660335777734319	0.699	0.352	0	CTB 3	DSC3
BIRC71	0	0.604979023800048	0.599	0.273	0	CTB 3	BIRC7
IVNS1ABP	0	0.603775603755009	0.607	0.311	0	CTB 3	IVNS1ABP
S100A161	0	0.602258736604131	0.684	0.312	0	CTB 3	S100A16
MME1	0	0.594678631009236	0.842	0.562	0	CTB 3	MME
ZNF395	0	0.574486181944275	0.556	0.268	0	CTB 3	ZNF395
VIT1	0	0.519060032251706	0.568	0.238	0	CTB 3	VIT
WNT61	0	0.515739360762381	0.55	0.227	0	CTB 3	WNT6
GATA3	0	0.495465919659807	0.964	0.87	0	CTB 3	GATA3
FTH1	0	0.48291767591727	0.997	0.994	0	CTB 3	FTH1
ENPP1	0	0.472953129315577	0.345	0.099	0	CTB 3	ENPP1
FOS	0	0.47259205076492	0.993	0.981	0	CTB 3	FOS
PERP1	0	0.461300407172399	0.938	0.854	0	CTB 3	PERP
FOSB	3.37888174074181e-306	0.638331134299296	0.948	0.903	8.12080437569886e-302	CTB 3	FOSB
ANXA11	1.77575134039678e-301	0.452914708704311	0.988	0.967	4.26784077150963e-297	CTB 3	ANXA1
AHNAK1	8.67904173063154e-297	0.506245554021778	0.958	0.872	2.08592088953998e-292	CTB 3	AHNAK
IFITM31	1.4623744048778e-294	0.539843568711522	0.919	0.707	3.5146706446833e-290	CTB 3	IFITM3
KLF41	4.70385881003046e-294	0.674056828156026	0.838	0.654	1.13052542640272e-289	CTB 3	KLF4
PLEC1	4.70566891326185e-286	0.546530557545818	0.72	0.444	1.13096046661335e-281	CTB 3	PLEC
TGM21	5.97805241208869e-283	0.5980729253826	0.832	0.564	1.4367651167214e-278	CTB 3	TGM2
HSPA1B1	5.73639349176531e-273	0.78309094664923	0.718	0.487	1.37868481181087e-268	CTB 3	HSPA1B
NPPB	3.16642934381178e-272	0.769388394362621	0.374	0.129	7.61019628491722e-268	CTB 3	NPPB
YBX3	3.18119882867914e-268	0.514119032892343	0.847	0.689	7.64569326484743e-264	CTB 3	YBX3
CD991	1.10233620467409e-267	0.518657258469283	0.821	0.599	2.6493548343137e-263	CTB 3	CD99
UCA11	2.48493050428666e-267	0.503570891031857	0.546	0.263	5.97228197400256e-263	CTB 3	UCA1
LDHA	3.07340199371848e-260	0.469060541978932	0.901	0.745	7.38661435170299e-256	CTB 3	LDHA
TPI1	3.3275170623347e-260	0.443028066136507	0.914	0.846	7.99735450761521e-256	CTB 3	TPI1
KRT181	5.80322825905795e-259	0.355199689407699	0.999	0.998	1.39474787978199e-254	CTB 3	KRT18
CITED2	8.50154827989527e-253	0.618854070197655	0.864	0.711	2.04326211359003e-248	CTB 3	CITED2
ATF31	6.8682992584154e-250	0.603158203189063	0.913	0.855	1.65072704376756e-245	CTB 3	ATF3
S100A101	8.63451217018718e-250	0.45202997948225	0.957	0.908	2.07521865498279e-245	CTB 3	S100A10
TMSB4X1	4.54951826552677e-248	0.566946831644577	0.689	0.403	1.0934312199367e-243	CTB 3	TMSB4X
HCAR2	7.32382840551754e-247	0.528913006743622	0.471	0.221	1.76020891898209e-242	CTB 3	HCAR2
JUNB1	1.18064131145469e-246	0.545099479029777	0.872	0.721	2.8375533279502e-242	CTB 3	JUNB
H3F3B1	9.6693490140124e-245	0.395346775316138	0.967	0.951	2.32393134202774e-240	CTB 3	H3F3B
PATJ1	4.30150360948682e-242	0.436617374056167	0.51	0.237	1.03382337750406e-237	CTB 3	PATJ
FGFR2	2.83914691995247e-241	0.425846730700501	0.425	0.178	6.82360570741376e-237	CTB 3	FGFR2
XAGE32	1.05024140798073e-239	0.498388178687126	0.926	0.795	2.52415019994088e-235	CTB 3	XAGE3
PNCK	1.06833288194331e-239	0.454157892882939	0.497	0.243	2.56763124846255e-235	CTB 3	PNCK
NDRG1	2.98207379008523e-234	0.559793697263725	0.689	0.438	7.16711614709084e-230	CTB 3	NDRG1
CLDN41	2.74638138115015e-233	0.420704986918354	0.922	0.83	6.60065301145626e-229	CTB 3	CLDN4
DPP71	1.39288998485314e-230	0.548766712931905	0.592	0.351	3.34767178959604e-226	CTB 3	DPP7
RPL26	1.6760636077207e-223	0.466893211942734	0.961	0.963	4.02825127479594e-219	CTB 3	RPL26
DSC21	1.43373969308218e-221	0.449333656770548	0.82	0.615	3.44584997835372e-217	CTB 3	DSC2
KRT6A	2.58173584206684e-219	0.511748799021158	0.306	0.101	6.20494392282344e-215	CTB 3	KRT6A
RPL36A1	2.44794740509891e-217	0.719178388932074	0.697	0.499	5.88339679341473e-213	CTB 3	RPL36A
RCN11	5.6713830148145e-215	0.456365903943734	0.798	0.61	1.36306019378052e-210	CTB 3	RCN1
ZFP36L1	2.19794118204128e-212	0.476380933604262	0.944	0.876	5.282531836918e-208	CTB 3	ZFP36L1
EMP3	3.46186625978242e-212	0.515782693694226	0.484	0.244	8.32024936876106e-208	CTB 3	EMP3
COL17A1	6.25268223699036e-212	0.421148070790823	0.907	0.684	1.50276964883826e-207	CTB 3	COL17A1
ADGRL31	2.90175787803417e-211	0.399362172559874	0.409	0.172	6.97408488406731e-207	CTB 3	ADGRL3
RPS19	6.63585369019018e-211	0.400916118755529	0.981	0.984	1.59486107590031e-206	CTB 3	RPS19
IGF1R1	1.84689966622305e-210	0.472437589506057	0.652	0.403	4.43883865780049e-206	CTB 3	IGF1R
KRT17	6.50624511579324e-208	0.582978834399966	0.586	0.316	1.56371095112975e-203	CTB 3	KRT17
ACSL3	2.16296162773807e-207	0.474758667027052	0.727	0.504	5.19846197610567e-203	CTB 3	ACSL3
HSP90AA11	9.09499305637858e-207	0.518444964939457	0.98	0.98	2.18589063117003e-202	CTB 3	HSP90AA1
HES11	6.12200033969994e-206	0.834186060815464	0.683	0.47	1.47136156164348e-201	CTB 3	HES1
YAP11	2.20986081217014e-203	0.497129695101904	0.703	0.481	5.31117947596971e-199	CTB 3	YAP1
SLC1A6	1.36201642191229e-202	0.497857119529104	0.48	0.255	3.27347026842399e-198	CTB 3	SLC1A6
RNF217	6.11006438242937e-197	0.457900860159749	0.613	0.362	1.46849287367308e-192	CTB 3	RNF217
LY6E1	1.68920114580951e-196	0.382098245382737	0.942	0.847	4.05982603383858e-192	CTB 3	LY6E
CYB5R11	1.93484828279075e-193	0.418059984172743	0.794	0.617	4.65021436285929e-189	CTB 3	CYB5R1
CLU1	2.23185609117941e-193	0.381634042649057	0.723	0.457	5.36404292954059e-189	CTB 3	CLU
DEPP11	1.44477598059156e-188	0.553244246837277	0.479	0.249	3.47237459175375e-184	CTB 3	DEPP1
BTG21	2.47448384106709e-187	0.483744978125775	0.712	0.467	5.94717446362065e-183	CTB 3	BTG2
AK4	5.82111150723381e-185	0.308811936081038	0.283	0.106	1.39904593964857e-180	CTB 3	AK4
KRT14	6.55646083089276e-184	0.497280304875894	0.666	0.409	1.57577979609677e-179	CTB 3	KRT14
COL3A11	8.40307975503515e-184	0.377443592260884	0.47	0.231	2.01959618832515e-179	CTB 3	COL3A1
MCL11	7.93362316342803e-182	0.445587544876993	0.851	0.738	1.90676699109829e-177	CTB 3	MCL1
ARHGAP291	4.36562983974786e-181	0.432575377143185	0.663	0.446	1.049235475685e-176	CTB 3	ARHGAP29
GAPDH	1.67952559631931e-180	0.341817290041854	0.982	0.978	4.03657181819383e-176	CTB 3	GAPDH
EGR1	8.42610376038616e-180	0.587891405034306	0.844	0.764	2.02512977777121e-175	CTB 3	EGR1
SFN	2.38117836630152e-177	0.394009223490745	0.518	0.271	5.72292408556908e-173	CTB 3	SFN
LAMB41	5.76371532233669e-177	0.382716910654944	0.435	0.206	1.3852513405704e-172	CTB 3	LAMB4
SOCS31	2.81657075681251e-176	0.504783222729553	0.687	0.485	6.76934615692318e-172	CTB 3	SOCS3
TMEM141	4.61658378108656e-176	0.467672497300978	0.614	0.417	1.10954974594634e-171	CTB 3	TMEM141
TACSTD21	3.76777931161298e-175	0.408625667799586	0.642	0.367	9.05548079753063e-171	CTB 3	TACSTD2
NUPR11	2.24026745916728e-174	0.408475543257535	0.579	0.326	5.38425881136263e-170	CTB 3	NUPR1
TENT5B	5.82797860517175e-174	0.296654199023922	0.266	0.097	1.40069637796698e-169	CTB 3	TENT5B
SMARCA11	1.04712974421536e-173	0.442448260950281	0.703	0.51	2.5166716272472e-169	CTB 3	SMARCA1
CD55	2.56481410380635e-173	0.393222417690047	0.856	0.763	6.16427421708818e-169	CTB 3	CD55
AXL	3.11548577316727e-170	0.336974949714816	0.373	0.164	7.48775850723022e-166	CTB 3	AXL
RPL36	9.85155363417177e-170	0.277013058349601	0.974	0.976	2.36772240043684e-165	CTB 3	RPL36
ARRDC3	2.32009250544618e-168	0.469611524243251	0.588	0.374	5.57611032758935e-164	CTB 3	ARRDC3
CYR61	2.932955993881e-165	0.606792743924723	0.83	0.736	7.04906643569359e-161	CTB 3	CYR61
TIMP1	3.34793702780136e-165	0.563272583923643	0.672	0.484	8.04643185261778e-161	CTB 3	TIMP1
ZFP361	4.78732804971547e-164	0.475276543781943	0.686	0.491	1.15058642346862e-159	CTB 3	ZFP36
DDIT4	2.52868562111009e-162	0.497193570276137	0.393	0.192	6.07744302177599e-158	CTB 3	DDIT4
FOSL2	2.37672985350247e-161	0.435392352147488	0.661	0.48	5.71223252990784e-157	CTB 3	FOSL2
RPS24	3.22318602976791e-161	0.257863028854747	0.988	0.993	7.74660530394419e-157	CTB 3	RPS24
GADD45B1	1.23897729287438e-160	0.548494435917552	0.702	0.53	2.97775802569429e-156	CTB 3	GADD45B
JCAD	3.15995649287703e-160	0.346926868046515	0.356	0.167	7.59463943498066e-156	CTB 3	JCAD
CLMN	6.59153786408383e-160	0.309999383696326	0.286	0.116	1.58421021025391e-155	CTB 3	CLMN
TNFSF10	1.25679673976342e-159	0.395523535865419	0.9	0.707	3.0205852843474e-155	CTB 3	TNFSF10
RND3	5.79166571264897e-159	0.500873332042478	0.741	0.546	1.39196893737805e-154	CTB 3	RND3
TOB11	4.10688056562117e-158	0.346725792041156	0.376	0.176	9.87047675141392e-154	CTB 3	TOB1
KRT81	6.00924624253665e-158	0.260015226077364	0.998	0.993	1.44426224193126e-153	CTB 3	KRT8
C19orf33	2.49969055478634e-157	0.331285748267067	0.323	0.139	6.00775627937349e-153	CTB 3	C19orf33
PPFIBP11	8.73678374375835e-157	0.390231048695996	0.635	0.429	2.09979860497488e-152	CTB 3	PPFIBP1
PKP2	1.12464821755354e-156	0.380526003113333	0.81	0.651	2.70297952606817e-152	CTB 3	PKP2
AC011453.1	1.56764527292044e-155	0.303795685332525	0.272	0.109	3.76767864893699e-151	CTB 3	AC011453.1
LPCAT1	2.69217844462139e-154	0.420088335099711	0.637	0.447	6.47038167380305e-150	CTB 3	LPCAT1
NECTIN21	1.56832321802974e-153	0.395030248285558	0.645	0.44	3.76930802221267e-149	CTB 3	NECTIN2
BLCAP	2.88176313095514e-153	0.372628046927632	0.569	0.369	6.92602950893759e-149	CTB 3	BLCAP
SPNS2	4.78842007235914e-151	0.31005608418264	0.282	0.115	1.15084888019079e-146	CTB 3	SPNS2
PHLDA31	5.21841560735042e-151	0.428445695171255	0.551	0.348	1.2541940070706e-146	CTB 3	PHLDA3
SOX151	1.28254869330697e-150	0.284595757804349	0.276	0.112	3.08247752949397e-146	CTB 3	SOX15
DNAJB11	1.52378090708639e-148	0.515624181869901	0.801	0.699	3.66225503209144e-144	CTB 3	DNAJB1
COL5A1	1.25340993599331e-147	0.424256499682997	0.593	0.361	3.01244544016632e-143	CTB 3	COL5A1
ATP2B41	2.0315098194807e-147	0.379493314174337	0.553	0.332	4.88253070013991e-143	CTB 3	ATP2B4
ERRFI1	1.37599821764927e-146	0.420623161122073	0.666	0.468	3.30707411629824e-142	CTB 3	ERRFI1
CCNL11	2.04200027676895e-146	0.424287908114279	0.809	0.682	4.9077434651865e-142	CTB 3	CCNL1
NEBL	2.31580683662165e-146	0.373689177603467	0.478	0.281	5.56581015113648e-142	CTB 3	NEBL
PPP1R15A1	5.77467414191751e-145	0.358888985734918	0.853	0.761	1.38788518326845e-140	CTB 3	PPP1R15A
EIF4A21	6.67852769682107e-143	0.351176971859168	0.808	0.706	1.60511734665398e-138	CTB 3	EIF4A2
INTS61	7.20640333495476e-143	0.531447008409078	0.701	0.546	1.73198697752303e-138	CTB 3	INTS6
NECTIN4	8.22227184777527e-138	0.442384591784167	0.586	0.405	1.97614081589431e-133	CTB 3	NECTIN4
ZFP36L2	3.77807833643023e-137	0.471543747230777	0.477	0.289	9.08023347377642e-133	CTB 3	ZFP36L2
HSPA1A1	1.16742621606947e-135	0.867078807142101	0.62	0.473	2.80579216770135e-131	CTB 3	HSPA1A
GBP21	1.57095770638031e-135	0.336104948808968	0.516	0.312	3.77563975151444e-131	CTB 3	GBP2
RAB251	7.33873443518912e-135	0.364366272694307	0.534	0.339	1.76379143415335e-130	CTB 3	RAB25
ARL4D	2.26784036558506e-134	0.341836989499696	0.378	0.197	5.45052753464713e-130	CTB 3	ARL4D
FABP51	3.8062976950615e-132	0.404261275976023	0.474	0.265	9.14805588031082e-128	CTB 3	FABP5
DAAM1	4.52176199206471e-132	0.387253490325303	0.585	0.41	1.08676027717283e-127	CTB 3	DAAM1
SDC4	7.96936215578708e-130	0.359273764132262	0.745	0.595	1.91535650052187e-125	CTB 3	SDC4
PGK1	2.24462830419446e-129	0.359808428677695	0.776	0.685	5.39473966630096e-125	CTB 3	PGK1
ZNF4311	8.49486532233821e-128	0.355066782289616	0.493	0.308	2.04165593157077e-123	CTB 3	ZNF431
VEGFA	1.16757864254935e-127	0.268371783318836	0.274	0.12	2.80615850950311e-123	CTB 3	VEGFA
RPS4Y11	1.33273200278836e-127	0.371261023227123	0.686	0.492	3.20308809550154e-123	CTB 3	RPS4Y1
NABP11	6.00765013476498e-126	0.433436867564832	0.59	0.414	1.44387863338942e-121	CTB 3	NABP1
CALM11	6.85313390010236e-126	0.292038086178164	0.927	0.884	1.6470822015506e-121	CTB 3	CALM1
CRIM11	1.33256662948105e-124	0.396695689563739	0.812	0.701	3.20269063729475e-120	CTB 3	CRIM1
MTUS11	3.43144922757466e-124	0.340921380795555	0.467	0.282	8.24714507355293e-120	CTB 3	MTUS1
PEG32	4.52755520964692e-124	0.353116339809065	0.844	0.66	1.08815261908654e-119	CTB 3	PEG3
NEDD91	2.9719410592414e-122	0.360654603318367	0.632	0.451	7.14276314178078e-118	CTB 3	NEDD9
MYLIP1	8.15651224571703e-120	0.416635810142778	0.666	0.524	1.96033615313563e-115	CTB 3	MYLIP
GTF2I1	4.07667608451289e-119	0.357743580797617	0.733	0.588	9.79788330151827e-115	CTB 3	GTF2I
NR3C1	4.33607483339101e-119	0.375246665992864	0.558	0.391	1.04213222545719e-114	CTB 3	NR3C1
EGFR2	1.80152757612478e-118	0.349354763029823	0.896	0.84	4.3297913764583e-114	CTB 3	EGFR
HEY1	7.88467608941461e-118	0.27716258830331	0.26	0.116	1.89500305132991e-113	CTB 3	HEY1
AL161431.1	1.98732961997955e-117	0.31168581524274	0.279	0.129	4.77634800865885e-113	CTB 3	AL161431.1
PFKP1	3.06557856259625e-117	0.302195101398984	0.493	0.296	7.36781151734382e-113	CTB 3	PFKP
MPDZ1	7.87551818408965e-117	0.335869553252151	0.455	0.282	1.89280204036411e-112	CTB 3	MPDZ
CLIC3	4.48969483380645e-116	0.319960926864237	0.897	0.839	1.07905325635704e-111	CTB 3	CLIC3
FERMT11	7.11824023352747e-116	0.318912200072635	0.464	0.28	1.71079785772599e-111	CTB 3	FERMT1
FNBP1L1	5.72944373454262e-113	0.352381970071944	0.659	0.514	1.37701450715997e-108	CTB 3	FNBP1L
IRS2	8.36373572063474e-113	0.364662377971252	0.484	0.311	2.01014024309735e-108	CTB 3	IRS2
MAST41	3.21767003966306e-112	0.356036593101641	0.582	0.413	7.7333481733262e-108	CTB 3	MAST4
SNHG7	1.24895617062965e-111	0.321695269804803	0.356	0.195	3.00174126049129e-107	CTB 3	SNHG7
BASP11	1.51795431683213e-110	0.254528019653672	0.93	0.902	3.64825140507435e-106	CTB 3	BASP1
DUSP1	1.06394788971971e-109	0.353039783478663	0.903	0.875	2.55709235815236e-105	CTB 3	DUSP1
BTG12	2.33828557805328e-109	0.301586936796225	0.87	0.796	5.61983555829325e-105	CTB 3	BTG1
LIMCH1	4.71699467264977e-109	0.373056982290868	0.47	0.304	1.13368249962465e-104	CTB 3	LIMCH1
ART4	6.22708262316406e-109	0.330652133948332	0.407	0.24	1.49661703765125e-104	CTB 3	ART4
TUT41	6.48745099034919e-109	0.341527562766095	0.648	0.489	1.55919397102053e-104	CTB 3	TUT4
CTNNB11	6.78529807089994e-109	0.316569242017643	0.795	0.671	1.63077853836009e-104	CTB 3	CTNNB1
BCAT11	1.10455442997401e-106	0.356607205361728	0.591	0.414	2.65468611699953e-102	CTB 3	BCAT1
PLAU1	1.52064915171708e-106	0.292308916233204	0.37	0.199	3.65472817123682e-102	CTB 3	PLAU
AKAP13	3.65210921299398e-106	0.357066063723662	0.647	0.514	8.77747928250973e-102	CTB 3	AKAP13
DSG2	2.90695453751303e-105	0.337667587906601	0.796	0.698	6.98657453545882e-101	CTB 3	DSG2
BNIP3L	7.5943708924271e-105	0.333536296881664	0.618	0.475	1.82523110028593e-100	CTB 3	BNIP3L
ERP27	6.61179627335916e-104	0.282451675571532	0.341	0.187	1.58907911633914e-99	CTB 3	ERP27
PGAP1	9.19416011154396e-104	0.306133473616541	0.368	0.205	2.20972444120848e-99	CTB 3	PGAP1
ERO1A	2.87227721561907e-103	0.338849018593392	0.509	0.356	6.90323106001887e-99	CTB 3	ERO1A
TSC22D11	3.15683988801344e-103	0.349269210149241	0.879	0.839	7.58714898685151e-99	CTB 3	TSC22D1
PLEKHA5	4.23072220863232e-103	0.352463963952688	0.578	0.431	1.01681177562269e-98	CTB 3	PLEKHA5
CPVL1	5.19046415740231e-102	0.31384612130864	0.781	0.671	1.24747615559007e-97	CTB 3	CPVL
NPEPPS1	1.01060867614076e-101	0.32986519278502	0.658	0.519	2.4288968922367e-97	CTB 3	NPEPPS
CEBPD	1.05842879715404e-101	0.311313730552626	0.867	0.8	2.54382777108001e-97	CTB 3	CEBPD
NLRP21	4.40051505107074e-101	0.321078342007701	0.657	0.502	1.05761978737434e-96	CTB 3	NLRP2
IER5	9.7561703577243e-101	0.357581521608868	0.645	0.51	2.34479798377546e-96	CTB 3	IER5
IER31	2.62243471674489e-100	0.382745803252887	0.451	0.287	6.30275959822467e-96	CTB 3	IER3
RPS26	9.43609269168006e-100	0.277679434398119	0.889	0.865	2.26787051751839e-95	CTB 3	RPS26
LOXL2	4.50456772812065e-99	0.32624470763034	0.396	0.236	1.08262780777652e-94	CTB 3	LOXL2
CST61	7.58362465655098e-99	0.26123576488866	0.727	0.539	1.82264834995546e-94	CTB 3	CST6
PLA2G161	7.77303883619396e-99	0.296001174384815	0.75	0.588	1.86817215389086e-94	CTB 3	PLA2G16
ZNF611	9.32082695558247e-99	0.256453554457048	0.313	0.167	2.24016755050469e-94	CTB 3	ZNF611
MXRA81	3.85975606969514e-98	0.294500851129139	0.55	0.363	9.27653773790531e-94	CTB 3	MXRA8
SLC2A1	7.87694399928361e-98	0.299556866148183	0.861	0.778	1.89314472078782e-93	CTB 3	SLC2A1
DARS	8.4223509100413e-98	0.31418410437893	0.635	0.506	2.02422781771933e-93	CTB 3	DARS
PKM	1.18069190537208e-97	0.290080148510514	0.857	0.796	2.83767492537126e-93	CTB 3	PKM
RPS10	1.32118156273858e-97	0.549294412575692	0.768	0.738	3.17532776788591e-93	CTB 3	RPS10
PDGFA1	1.49778519278621e-97	0.286332260850136	0.374	0.213	3.59977693234238e-93	CTB 3	PDGFA
COL1A2	3.59854822268034e-97	0.36604385227379	0.267	0.131	8.64875079838993e-93	CTB 3	COL1A2
MDK1	7.66339550812878e-97	0.377024704403911	0.524	0.362	1.84182047642367e-92	CTB 3	MDK
RFK1	8.14716632502137e-97	0.314423432797975	0.687	0.549	1.95808995455564e-92	CTB 3	RFK
RTN41	4.06973953088896e-96	0.262006459352167	0.906	0.865	9.78121198853853e-92	CTB 3	RTN4
SLC16A1	5.11248186342912e-95	0.320952777460343	0.6	0.455	1.22873389105655e-90	CTB 3	SLC16A1
NEAT11	1.92075506018409e-94	0.387162228541341	0.967	0.959	4.61634271164645e-90	CTB 3	NEAT1
BHLHE401	2.67746826640966e-94	0.336665027386358	0.464	0.304	6.43502723148898e-90	CTB 3	BHLHE40
ABLIM11	6.28362327516655e-93	0.27546811125703	0.318	0.173	1.51020601795353e-88	CTB 3	ABLIM1
ZFAS1	1.44689907637821e-92	0.318153471833312	0.757	0.677	3.47747724016738e-88	CTB 3	ZFAS1
TRAM2	5.44697020753964e-91	0.338939199609689	0.537	0.404	1.30912481968008e-86	CTB 3	TRAM2
TFAP2A	5.86230947314247e-91	0.298340326816386	0.792	0.711	1.40894745877506e-86	CTB 3	TFAP2A
GPRC5A	8.3700977578587e-91	0.306428329242957	0.573	0.401	2.01166929512376e-86	CTB 3	GPRC5A
UBB1	1.2442539691057e-90	0.35121477951671	0.878	0.873	2.99043998934865e-86	CTB 3	UBB
NAV2	1.22980396727833e-89	0.339214539452495	0.624	0.486	2.95571085495675e-85	CTB 3	NAV2
VMP1	1.70365625481475e-89	0.371569056391905	0.639	0.52	4.09456744282176e-85	CTB 3	VMP1
ZMYND8	3.07453918420815e-88	0.344087199909469	0.615	0.493	7.38934747532587e-84	CTB 3	ZMYND8
DDR1	3.35403823262412e-88	0.303223077742926	0.484	0.33	8.0610954882888e-84	CTB 3	DDR1
IFIT11	5.73915368689988e-88	0.292032115483961	0.395	0.238	1.37934819710952e-83	CTB 3	IFIT1
CARHSP11	9.67630608397651e-88	0.279571204147936	0.717	0.58	2.32560340422292e-83	CTB 3	CARHSP1
HK2	4.31173713246e-87	0.292945693507138	0.283	0.15	1.03628290241544e-82	CTB 3	HK2
PRKAB21	6.20711924893132e-87	0.290667167965894	0.414	0.268	1.49181904028815e-82	CTB 3	PRKAB2
RGCC	2.09814864673794e-86	0.528495848638307	0.436	0.289	5.04269045756996e-82	CTB 3	RGCC
AC020916.1	1.12251178146773e-85	0.34726196879034	0.521	0.375	2.69784481557955e-81	CTB 3	AC020916.1
ECE1	1.84367695009584e-85	0.307245300581889	0.545	0.405	4.43109318186034e-81	CTB 3	ECE1
RPL17	2.1471538283047e-85	0.47727448721523	0.434	0.301	5.16046951094751e-81	CTB 3	RPL17
HSPA21	2.2670652644499e-85	0.30866231134716	0.629	0.479	5.44866465657888e-81	CTB 3	HSPA2
SLC6A8	1.37836233963515e-84	0.321969202411141	0.559	0.416	3.31275604707911e-80	CTB 3	SLC6A8
DYNLL1	7.17775642590595e-84	0.254167897026884	0.888	0.834	1.72510197940224e-79	CTB 3	DYNLL1
ITPR21	6.83013140428293e-83	0.357734072211128	0.615	0.496	1.64155378170536e-78	CTB 3	ITPR2
SFRP1	1.39457542252958e-82	0.418166806119628	0.676	0.558	3.35172257050759e-78	CTB 3	SFRP1
MT-ND4	4.07373568987793e-82	0.258778394905917	0.993	0.996	9.79081635705261e-78	CTB 3	MT-ND4
ITGA62	1.11192648581708e-81	0.292421214633383	0.741	0.603	2.67240411601278e-77	CTB 3	ITGA6
SLC5A3	9.13295518719763e-81	0.337213380450937	0.422	0.277	2.19501444969108e-76	CTB 3	SLC5A3
EDNRB1	2.75545973234063e-80	0.285741028299489	0.462	0.317	6.62247192070748e-76	CTB 3	EDNRB
ITGB41	3.6749075004933e-80	0.26146162616441	0.636	0.462	8.83227268668559e-76	CTB 3	ITGB4
BNIP3	5.68975574265032e-79	0.333472892225159	0.576	0.458	1.36747589518858e-74	CTB 3	BNIP3
JUP	1.56056474965952e-78	0.300718143094865	0.683	0.576	3.75066131933168e-74	CTB 3	JUP
RPS17	1.64348667697995e-78	0.33806904717879	0.538	0.412	3.9499558794536e-74	CTB 3	RPS17
INSR1	2.91994454983319e-78	0.328726184197868	0.495	0.367	7.01779473106909e-74	CTB 3	INSR
BLVRB	5.24528180375545e-78	0.292068408470131	0.476	0.344	1.26065102871458e-73	CTB 3	BLVRB
SEPT7	7.08670321225322e-78	0.264749425488175	0.757	0.663	1.70321825003294e-73	CTB 3	SEPT7
MYH9	1.32542380800028e-77	0.270955820359631	0.807	0.716	3.18552358014788e-73	CTB 3	MYH9
FUS	2.42499564806221e-75	0.259307987809729	0.877	0.83	5.82823454055273e-71	CTB 3	FUS
SERTAD11	3.14969595561262e-75	0.309909405293612	0.64	0.527	7.56997925971937e-71	CTB 3	SERTAD1
RAB11FIP11	3.38053759777287e-75	0.289266208328286	0.58	0.432	8.12478406248731e-71	CTB 3	RAB11FIP1
UBL3	4.14830685204828e-75	0.29567214323617	0.692	0.567	9.97004068821284e-71	CTB 3	UBL3
HILPDA	5.16792248336598e-75	0.407699376553031	0.531	0.411	1.24205848965218e-70	CTB 3	HILPDA
SNX21	1.25181026751266e-74	0.263167631704279	0.67	0.562	3.00860079693994e-70	CTB 3	SNX2
LIMK21	4.49098462213727e-74	0.264971422077703	0.507	0.37	1.07936324408447e-69	CTB 3	LIMK2
AC245041.2	5.72201740048391e-74	0.275998848139696	0.452	0.316	1.3752296620323e-69	CTB 3	AC245041.2
WSB11	9.0645388221938e-74	0.263867616543225	0.865	0.83	2.17857126052606e-69	CTB 3	WSB1
MAML2	3.56200413072944e-73	0.290373015810058	0.512	0.384	8.56092072779513e-69	CTB 3	MAML2
ADAMTS1	1.04522588666894e-71	0.29869123144617	0.77	0.649	2.51209589602012e-67	CTB 3	ADAMTS1
BACH1	1.27839577036905e-71	0.300705508679756	0.485	0.361	3.07249639450497e-67	CTB 3	BACH1
KCNQ1OT11	2.58093246280707e-71	0.438968503293671	0.749	0.692	6.20301308111051e-67	CTB 3	KCNQ1OT1
HELZ	3.91107758655604e-71	0.314303191037576	0.563	0.449	9.39988387152879e-67	CTB 3	HELZ
MXI1	4.38713719561314e-71	0.287448396450703	0.373	0.247	1.05440455359366e-66	CTB 3	MXI1
ESYT2	2.0068288062745e-69	0.290700303650496	0.483	0.363	4.82321235300013e-65	CTB 3	ESYT2
MZT2A	2.4061056002902e-69	0.270446725307535	0.478	0.349	5.78283419973747e-65	CTB 3	MZT2A
CSPP11	1.25084289737139e-68	0.278320420115634	0.479	0.353	3.0062758195424e-64	CTB 3	CSPP1
DOCK91	1.35586859982697e-68	0.274532268792524	0.466	0.334	3.25869459282414e-64	CTB 3	DOCK9
PYGL	9.53824575054307e-68	0.270648915913504	0.547	0.435	2.29242198368552e-63	CTB 3	PYGL
TNFAIP8	4.25753917873171e-67	0.254473044902098	0.74	0.655	1.02325696621638e-62	CTB 3	TNFAIP8
FTX	2.97455488768884e-66	0.303529449296784	0.467	0.341	7.14904521707136e-62	CTB 3	FTX
CAPN6	3.10341920161815e-66	0.293518933407699	0.463	0.323	7.45875770916906e-62	CTB 3	CAPN6
PLS3	5.24568929784188e-66	0.263567678375823	0.528	0.401	1.26074896584332e-61	CTB 3	PLS3
C1orf115	2.0532141347543e-65	0.262829671736983	0.79	0.714	4.93469485146848e-61	CTB 3	C1orf115
PLK2	3.71824022141163e-65	0.274541350571418	0.761	0.672	8.93641854814071e-61	CTB 3	PLK2
AMOT1	3.48420541189565e-64	0.252607176737936	0.457	0.324	8.37393928695001e-60	CTB 3	AMOT
MDM21	6.51560723788746e-63	0.422410136032721	0.519	0.41	1.56596104355387e-58	CTB 3	MDM2
IFRD11	1.64685989375853e-62	0.319472765696125	0.559	0.448	3.95806306865925e-58	CTB 3	IFRD1
HIC2	2.70228843831618e-62	0.299999248499157	0.538	0.431	6.4946800326491e-58	CTB 3	HIC2
HSPA51	2.12144917376741e-60	0.426511521711509	0.886	0.888	5.09869094423259e-56	CTB 3	HSPA5
P4HA1	4.1177215587091e-60	0.276829631127111	0.684	0.596	9.89653199420146e-56	CTB 3	P4HA1
PIAS1	5.61138765516319e-60	0.271721303942042	0.416	0.301	1.34864090904192e-55	CTB 3	PIAS1
SP100	2.92868332756824e-59	0.264727264522885	0.577	0.475	7.03879750947751e-55	CTB 3	SP100
MDM4	2.95791914201732e-59	0.276318664644681	0.41	0.293	7.10906286592442e-55	CTB 3	MDM4
SOCS11	6.1503324340874e-58	0.265831068275145	0.368	0.25	1.47817089720857e-53	CTB 3	SOCS1
RYBP	1.24887610103738e-57	0.272632459192009	0.472	0.364	3.00154882123323e-53	CTB 3	RYBP
C4orf3	6.75606907940325e-57	0.262689897561697	0.657	0.584	1.62375364254378e-52	CTB 3	C4orf3
ERICH1	9.75547103919318e-57	0.253064539209035	0.454	0.343	2.34462990955969e-52	CTB 3	ERICH1
CDKN1A	3.04987064314008e-56	0.320446145523145	0.49	0.382	7.33005910372287e-52	CTB 3	CDKN1A
NFKBIA1	1.31017908427657e-55	0.312387303617792	0.775	0.719	3.14888441115031e-51	CTB 3	NFKBIA
AMOTL2	1.6349112565518e-55	0.276530443575804	0.57	0.471	3.92934571399659e-51	CTB 3	AMOTL2
BAX	1.90508277073008e-55	0.271391779787173	0.512	0.409	4.57867593117269e-51	CTB 3	BAX
ZNF91	5.54299123437612e-55	0.250469571337175	0.494	0.387	1.33220251326996e-50	CTB 3	ZNF91
ARHGAP5	1.43026452357411e-54	0.262336911243942	0.434	0.325	3.43749775595803e-50	CTB 3	ARHGAP5
FAM53C1	2.03232266165331e-54	0.303851454715024	0.47	0.36	4.88448428501756e-50	CTB 3	FAM53C
CSF1R	5.29875279204038e-54	0.266496091700869	0.462	0.344	1.27350224603898e-49	CTB 3	CSF1R
KLF5	6.12732585527632e-54	0.262167829372162	0.667	0.586	1.47264149605711e-49	CTB 3	KLF5
IRX2	6.45625855062712e-54	0.267679200942179	0.534	0.432	1.55169718005772e-49	CTB 3	IRX2
SLC38A2	6.01585256458215e-51	0.265078442511938	0.65	0.569	1.44585000537167e-46	CTB 3	SLC38A2
S100A6	1.44997572856681e-50	0.250453397203703	0.928	0.909	3.48487166603747e-46	CTB 3	S100A6
AGRN	2.24477781192769e-50	0.251527045147585	0.35	0.245	5.395098993187e-46	CTB 3	AGRN
MYC	4.83441579666281e-48	0.251632928618437	0.284	0.184	1.16190349256994e-43	CTB 3	MYC
GCC2	2.24935241640033e-47	0.25875928635735	0.634	0.571	5.40609359757655e-43	CTB 3	GCC2
RGS16	7.37761629280904e-46	0.272372647066009	0.374	0.269	1.77313629981373e-41	CTB 3	RGS16
MAFF1	1.33061858705635e-38	0.287377304995479	0.604	0.548	3.19800871213123e-34	CTB 3	MAFF
IRF11	3.12560549173892e-34	0.259295101363867	0.608	0.534	7.51208023884533e-30	CTB 3	IRF1
SGK1	5.15034713775966e-26	0.283775361751357	0.434	0.364	1.23783443108916e-21	CTB 3	SGK1
KRT6A1	0	2.08347150877151	0.61	0.08	0	CTB 4	KRT6A
KRT171	0	1.64962354541905	0.89	0.296	0	CTB 4	KRT17
KRT141	0	1.58517613596373	0.918	0.393	0	CTB 4	KRT14
TAGLN	0	1.51824687869611	0.577	0.136	0	CTB 4	TAGLN
SFN1	0	1.30151852563534	0.854	0.248	0	CTB 4	SFN
COL5A11	0	1.27367930285473	0.872	0.343	0	CTB 4	COL5A1
NPPB1	0	1.13554617480607	0.456	0.128	0	CTB 4	NPPB
ITGA21	0	1.11166614810397	0.791	0.209	0	CTB 4	ITGA2
RND31	0	1.06841168885977	0.927	0.535	0	CTB 4	RND3
TCIM2	0	1.03016848358371	0.947	0.473	0	CTB 4	TCIM
TGM22	0	1.02783379109141	0.957	0.559	0	CTB 4	TGM2
CST62	0	1.00154670348229	0.922	0.527	0	CTB 4	CST6
SFRP11	0	0.997454960609852	0.822	0.549	0	CTB 4	SFRP1
TMSB4X2	0	0.96762921868256	0.827	0.398	0	CTB 4	TMSB4X
LAMA3	0	0.966770336634191	0.728	0.276	0	CTB 4	LAMA3
LAMB3	0	0.927252981724583	0.589	0.116	0	CTB 4	LAMB3
SGK11	0	0.913284733384236	0.724	0.342	0	CTB 4	SGK1
PRSS23	0	0.900232229323196	0.628	0.139	0	CTB 4	PRSS23
S100A162	0	0.897292034599087	0.86	0.306	0	CTB 4	S100A16
EMP31	0	0.877146859068006	0.711	0.23	0	CTB 4	EMP3
S100A102	0	0.863799491275814	0.993	0.906	0	CTB 4	S100A10
CYR611	0	0.861511920740365	0.945	0.728	0	CTB 4	CYR61
THBS1	0	0.824630295063373	0.466	0.088	0	CTB 4	THBS1
COL17A11	0	0.8215213622861	0.981	0.683	0	CTB 4	COL17A1
MYL9	0	0.819454411022622	0.452	0.098	0	CTB 4	MYL9
ANKRD1	0	0.812529570722488	0.344	0.075	0	CTB 4	ANKRD1
AXL1	0	0.799071111349967	0.676	0.143	0	CTB 4	AXL
MARCKS1	0	0.796230445121951	0.889	0.457	0	CTB 4	MARCKS
LDHA1	0	0.778354149678281	0.96	0.743	0	CTB 4	LDHA
SLC2A32	0	0.765856416987846	0.864	0.408	0	CTB 4	SLC2A3
RNF2171	0	0.745579241422163	0.825	0.35	0	CTB 4	RNF217
TNFRSF12A1	0	0.74190437150489	0.851	0.487	0	CTB 4	TNFRSF12A
BIRC72	0	0.732801801836599	0.715	0.27	0	CTB 4	BIRC7
UBL31	0	0.72200193127284	0.884	0.554	0	CTB 4	UBL3
JUN2	0	0.721389148909353	0.968	0.734	0	CTB 4	JUN
ITGB61	0	0.706250622421952	0.629	0.176	0	CTB 4	ITGB6
CD992	0	0.700474135152059	0.923	0.596	0	CTB 4	CD99
ACTN1	0	0.695759634558776	0.882	0.621	0	CTB 4	ACTN1
GPRC5A1	0	0.69201040355486	0.816	0.385	0	CTB 4	GPRC5A
IFITM32	0	0.685727279224533	0.969	0.708	0	CTB 4	IFITM3
ADAMTS11	0	0.685475774529771	0.909	0.64	0	CTB 4	ADAMTS1
C19orf331	0	0.681416167103516	0.567	0.122	0	CTB 4	C19orf33
EGLN31	0	0.679392239124037	0.941	0.615	0	CTB 4	EGLN3
LAMC2	0	0.663039895990146	0.591	0.207	0	CTB 4	LAMC2
PPDPF2	0	0.662749853848275	0.853	0.431	0	CTB 4	PPDPF
EMILIN2	0	0.659062954303127	0.568	0.15	0	CTB 4	EMILIN2
AL161431.11	0	0.658477219534175	0.544	0.11	0	CTB 4	AL161431.1
ACSL31	0	0.656756173392123	0.885	0.496	0	CTB 4	ACSL3
IVNS1ABP1	0	0.654021580232112	0.693	0.311	0	CTB 4	IVNS1ABP
PLEC2	0	0.653643398946005	0.858	0.438	0	CTB 4	PLEC
LOXL21	0	0.649240177594086	0.59	0.223	0	CTB 4	LOXL2
YBX31	0	0.646016191474786	0.946	0.685	0	CTB 4	YBX3
ZFP36L21	0	0.643925051169956	0.634	0.28	0	CTB 4	ZFP36L2
DST	0	0.643490562688654	0.775	0.417	0	CTB 4	DST
KRT182	0	0.628620700026041	1	0.998	0	CTB 4	KRT18
COL3A12	0	0.626025584205747	0.632	0.223	0	CTB 4	COL3A1
VIT2	0	0.624415156807984	0.714	0.233	0	CTB 4	VIT
TAGLN2	0	0.624126506818383	0.986	0.847	0	CTB 4	TAGLN2
DSC31	0	0.622823778589512	0.781	0.352	0	CTB 4	DSC3
FLNA	0	0.619961564247968	0.784	0.441	0	CTB 4	FLNA
NUAK1	0	0.610444883255028	0.555	0.22	0	CTB 4	NUAK1
ODAPH	0	0.598750945139277	0.485	0.108	0	CTB 4	ODAPH
TNS4	0	0.592420561194483	0.498	0.113	0	CTB 4	TNS4
IGF1R2	0	0.571247266655148	0.79	0.397	0	CTB 4	IGF1R
INHBA	0	0.56544963671856	0.36	0.077	0	CTB 4	INHBA
ENPP11	0	0.565307799022311	0.473	0.093	0	CTB 4	ENPP1
UACA	0	0.564452559760973	0.311	0.067	0	CTB 4	UACA
ACTB	0	0.561782586871205	0.998	0.987	0	CTB 4	ACTB
TGFBR1	0	0.548596118847016	0.689	0.327	0	CTB 4	TGFBR1
PSG5	0	0.543347703677544	0.761	0.368	0	CTB 4	PSG5
ART41	0	0.542656993729161	0.638	0.225	0	CTB 4	ART4
TNNT31	0	0.54175946436736	0.686	0.28	0	CTB 4	TNNT3
PFKP2	0	0.538677550881594	0.696	0.283	0	CTB 4	PFKP
CYB5R12	0	0.529457647247749	0.902	0.612	0	CTB 4	CYB5R1
CLDN61	0	0.526800955293258	0.479	0.126	0	CTB 4	CLDN6
EFNB2	0	0.521165073558468	0.563	0.214	0	CTB 4	EFNB2
TGFBI	0	0.516147448316415	0.325	0.061	0	CTB 4	TGFBI
WNT62	0	0.515415385844073	0.676	0.223	0	CTB 4	WNT6
PODXL	0	0.502783601904131	0.339	0.064	0	CTB 4	PODXL
TRIM29	0	0.502738810275881	0.547	0.175	0	CTB 4	TRIM29
CRIP1	0	0.500152515450201	0.472	0.155	0	CTB 4	CRIP1
PERP2	0	0.491572012266736	0.973	0.853	0	CTB 4	PERP
FTH11	0	0.490374315479881	0.999	0.994	0	CTB 4	FTH1
PORCN	0	0.489004118975122	0.37	0.072	0	CTB 4	PORCN
ANXA2	0	0.486695826485838	0.995	0.979	0	CTB 4	ANXA2
IL32	0	0.47313674416256	0.251	0.047	0	CTB 4	IL32
AGRN1	0	0.471254263960069	0.585	0.227	0	CTB 4	AGRN
S100A11	0	0.456712260095735	0.998	0.995	0	CTB 4	S100A11
KRT82	0	0.455964156399229	0.999	0.993	0	CTB 4	KRT8
AHNAK2	0	0.437038757308254	0.334	0.078	0	CTB 4	AHNAK2
FILIP1L	0	0.429468174492442	0.293	0.063	0	CTB 4	FILIP1L
PDLIM7	0	0.423581537061847	0.381	0.085	0	CTB 4	PDLIM7
DKK3	0	0.416024807176488	0.35	0.059	0	CTB 4	DKK3
EMP1	0	0.408344781138847	0.251	0.032	0	CTB 4	EMP1
CTPS1	0	0.400572067439917	0.452	0.152	0	CTB 4	CTPS1
ST5	0	0.39921779201121	0.402	0.102	0	CTB 4	ST5
ETS1	0	0.374881435146659	0.374	0.075	0	CTB 4	ETS1
GJB3	0	0.365828146483271	0.314	0.058	0	CTB 4	GJB3
SEMA3C	0	0.359393386582707	0.381	0.094	0	CTB 4	SEMA3C
SNAI2	0	0.347749884792202	0.339	0.067	0	CTB 4	SNAI2
C5orf46	0	0.339801429228342	0.308	0.07	0	CTB 4	C5orf46
TENT5B1	0	0.323283836001115	0.356	0.093	0	CTB 4	TENT5B
ASAP2	0	0.318342493951841	0.35	0.093	0	CTB 4	ASAP2
EHD2	0	0.317009205370148	0.308	0.048	0	CTB 4	EHD2
PDGFC	0	0.283701095126327	0.307	0.067	0	CTB 4	PDGFC
COL4A5	0	0.264842087464279	0.268	0.054	0	CTB 4	COL4A5
JUNB2	8.06222912013936e-307	0.607090138292809	0.935	0.719	1.93767614673429e-302	CTB 4	JUNB
LGALS14	4.03519321848646e-300	0.395409287599364	0.271	0.059	9.69818338131037e-296	CTB 4	LGALS14
CLMN1	7.76813362356305e-299	0.354129168501729	0.382	0.112	1.86699323508714e-294	CTB 4	CLMN
PKM1	3.34569287735738e-294	0.522817215639316	0.954	0.789	8.04103826144073e-290	CTB 4	PKM
JAK1	3.87945101476136e-294	0.531991121483416	0.843	0.546	9.32387256887744e-290	CTB 4	JAK1
FSCN1	1.66319972632314e-291	0.51094130100144	0.638	0.3	3.99733422224502e-287	CTB 4	FSCN1
FGFR21	2.13881975803856e-290	0.412130371168619	0.496	0.177	5.14043940646987e-286	CTB 4	FGFR2
UCA12	1.95567071209722e-286	0.401793181445453	0.63	0.263	4.70025898945446e-282	CTB 4	UCA1
CYTOR	2.36160863180965e-285	0.387334758920866	0.412	0.135	5.6758901856913e-281	CTB 4	CYTOR
RUNX1	6.43193536086365e-285	0.42302853742427	0.521	0.207	1.54585134462997e-280	CTB 4	RUNX1
RGCC1	5.42579888031201e-284	0.785906188523368	0.606	0.278	1.30403650289419e-279	CTB 4	RGCC
HSD3B1	5.31161306107913e-282	0.755827621198321	0.798	0.513	1.27659308309976e-277	CTB 4	HSD3B1
S100A14	1.23905636624574e-276	0.357105512845664	0.276	0.065	2.977948070635e-272	CTB 4	S100A14
BOK	2.81628811080068e-276	0.314506457203825	0.363	0.108	6.76866684549835e-272	CTB 4	BOK
HK21	4.94740126509117e-276	0.464040161396576	0.418	0.141	1.18905842005201e-271	CTB 4	HK2
ACTG1	3.87715412854848e-274	0.455687176874436	0.994	0.979	9.31835223255343e-270	CTB 4	ACTG1
LAMB42	1.50547776920345e-272	0.440072592511521	0.53	0.203	3.61826527050358e-268	CTB 4	LAMB4
PTMS	1.52506623756612e-271	0.486698428021239	0.864	0.576	3.66534419536642e-267	CTB 4	PTMS
NEDD92	4.1385479146511e-271	0.494194905601243	0.775	0.443	9.94658605807245e-267	CTB 4	NEDD9
MYL6	9.50428135299026e-271	0.441705835903027	0.988	0.954	2.28425898037768e-266	CTB 4	MYL6
OSMR	1.98832886161303e-269	0.399528607415495	0.543	0.225	4.77874958600074e-265	CTB 4	OSMR
ABLIM12	3.65923541639224e-267	0.347160890853914	0.462	0.164	8.79460639975712e-263	CTB 4	ABLIM1
DEGS12	4.82586064126289e-267	0.451304698232639	0.825	0.47	1.15984734652112e-262	CTB 4	DEGS1
TACSTD22	4.40628833217688e-264	0.483999060784844	0.756	0.364	1.05900733775539e-259	CTB 4	TACSTD2
KCTD11	8.67823069287367e-264	0.328788629307372	0.324	0.092	2.08572596472526e-259	CTB 4	KCTD11
COL1A21	9.86075959393742e-264	0.813848850100366	0.378	0.124	2.36993496080692e-259	CTB 4	COL1A2
JCAD1	5.00206713282539e-262	0.336112990933374	0.454	0.163	1.20219681470325e-257	CTB 4	JCAD
AC245595.1	1.26698669466377e-260	0.359310963405022	0.463	0.177	3.0450758219549e-256	CTB 4	AC245595.1
PLS31	6.52692835380611e-255	0.457192286125763	0.714	0.388	1.56868196055376e-250	CTB 4	PLS3
ABL2	7.86841910104684e-252	0.360509403143829	0.435	0.159	1.8910958467456e-247	CTB 4	ABL2
ATP2B42	1.35176954253162e-251	0.430305527168763	0.682	0.326	3.24884291852051e-247	CTB 4	ATP2B4
YAP12	3.21134721257401e-250	0.460900363348158	0.807	0.477	7.71815189070037e-246	CTB 4	YAP1
MYH91	2.54115098627383e-247	0.471376741261123	0.926	0.708	6.10740228041053e-243	CTB 4	MYH9
CDA	2.54009808628931e-246	0.519446603322907	0.503	0.197	6.10487174058773e-242	CTB 4	CDA
GFOD1	5.58605311804404e-246	0.418879679719154	0.632	0.304	1.34255200639071e-241	CTB 4	GFOD1
SYT16	1.1855038794827e-244	0.251610268845173	0.317	0.09	2.84924002394872e-240	CTB 4	SYT16
SLC7A7	3.73874530315044e-244	0.283531133486681	0.28	0.074	8.98570046159177e-240	CTB 4	SLC7A7
ANXA12	8.35176786533116e-243	0.363814247846664	0.996	0.967	2.00726388875369e-238	CTB 4	ANXA1
CAPN2	1.2171247020661e-242	0.429655822378242	0.744	0.427	2.92523750894567e-238	CTB 4	CAPN2
KRT7	3.63269825410023e-242	0.439989561261108	0.997	0.986	8.7308269839045e-238	CTB 4	KRT7
SPNS21	2.29743910195983e-241	0.323454591839599	0.357	0.112	5.52166513765024e-237	CTB 4	SPNS2
PDLIM12	5.98416713808948e-240	0.556396408126681	0.779	0.441	1.43823472996843e-235	CTB 4	PDLIM1
GRAMD2B	4.67877827321019e-239	0.358298605373837	0.633	0.298	1.12449757018334e-234	CTB 4	GRAMD2B
SLCO2A1	4.11762549488684e-237	0.445704598546474	0.729	0.381	9.89630111441104e-233	CTB 4	SLCO2A1
FAM84B	5.25088869856858e-237	0.277271595726497	0.349	0.11	1.26199858981397e-232	CTB 4	FAM84B
TES	1.23864071059038e-236	0.505189238339122	0.84	0.567	2.97694908383292e-232	CTB 4	TES
HACD2	1.21889441486158e-235	0.387404271361182	0.557	0.255	2.92949083667833e-231	CTB 4	HACD2
SCCPDH1	1.18900379456182e-230	0.454066101531509	0.559	0.259	2.85765171984988e-226	CTB 4	SCCPDH
SPECC1	1.95955482610258e-230	0.3141581500058	0.449	0.175	4.70959406905495e-226	CTB 4	SPECC1
PATJ2	4.08255534086312e-230	0.333900704967869	0.568	0.238	9.81201350623043e-226	CTB 4	PATJ
SLC7A5	1.0807806603061e-227	0.368989811236767	0.462	0.185	2.59754823897967e-223	CTB 4	SLC7A5
RCN12	6.53400916659078e-222	0.420305662075463	0.889	0.607	1.57038376309843e-217	CTB 4	RCN1
TARSL2	8.54740102208131e-221	0.270676319055465	0.355	0.119	2.05428236164702e-216	CTB 4	TARSL2
AFAP1L21	9.68849943277925e-221	0.255820937716609	0.381	0.13	2.32853395367416e-216	CTB 4	AFAP1L2
PGK11	1.91760004687122e-218	0.482208987502091	0.888	0.677	4.60875995265028e-214	CTB 4	PGK1
CSRP1	2.49353733014129e-218	0.49958178191683	0.746	0.476	5.99296761926158e-214	CTB 4	CSRP1
SPTBN11	4.23130525114374e-218	0.428885749755141	0.625	0.318	1.01695190405989e-213	CTB 4	SPTBN1
EPSTI1	5.07011938587711e-218	0.448242333940583	0.725	0.421	1.2185524932017e-213	CTB 4	EPSTI1
TMOD3	3.62418514783406e-216	0.42164687229389	0.861	0.616	8.71036658430439e-212	CTB 4	TMOD3
GPR143	9.48507445369027e-216	0.270128024293674	0.447	0.172	2.27964279419992e-211	CTB 4	GPR143
MAST42	1.23433577598726e-215	0.412252377757036	0.718	0.405	2.96660260400779e-211	CTB 4	MAST4
DYNLL11	3.39826459519287e-215	0.389400455959849	0.954	0.829	8.16738912808655e-211	CTB 4	DYNLL1
GADD45A1	1.81606105482663e-212	0.579207798879941	0.751	0.482	4.36472113917031e-208	CTB 4	GADD45A
NDRG11	8.80533230067399e-212	0.755637240061404	0.715	0.442	2.11627356514399e-207	CTB 4	NDRG1
ANXA8	4.16221087955744e-211	0.263766114429456	0.375	0.134	1.00034576279283e-206	CTB 4	ANXA8
SPATS2L	2.99926539431394e-210	0.418652403789914	0.749	0.455	7.20843444869412e-206	CTB 4	SPATS2L
FERMT12	1.59411204100392e-209	0.333156367899716	0.586	0.274	3.83128887934881e-205	CTB 4	FERMT1
ITGA63	2.45398720400822e-209	0.440408858659164	0.874	0.595	5.89791284611335e-205	CTB 4	ITGA6
CCDC80	2.93357518607801e-207	0.485201043020203	0.732	0.432	7.05055460221989e-203	CTB 4	CCDC80
SEMA5A	9.5153639422065e-206	0.4414001791659	0.646	0.349	2.28692256986991e-201	CTB 4	SEMA5A
ATF32	1.06881793590099e-205	0.516062831161517	0.945	0.853	2.56879702714445e-201	CTB 4	ATF3
ERRFI11	3.92724490476174e-205	0.453397175211141	0.77	0.464	9.43874040410438e-201	CTB 4	ERRFI1
FBLIM1	2.56006277799699e-204	0.430870279671955	0.733	0.438	6.15285488063797e-200	CTB 4	FBLIM1
NECTIN22	2.88724287748071e-204	0.38493175330665	0.753	0.436	6.93919953173713e-200	CTB 4	NECTIN2
GALNT2	3.57716565624295e-204	0.420373123294333	0.724	0.422	8.5973599382143e-200	CTB 4	GALNT2
SERPING1	3.82900112324302e-204	0.503944129516162	0.908	0.657	9.20262129960228e-200	CTB 4	SERPING1
FTL2	1.75289930393956e-202	0.570663866240178	0.991	0.931	4.21291818708834e-198	CTB 4	FTL
BTG22	1.86172072274021e-200	0.456340912251332	0.785	0.466	4.47445958503382e-196	CTB 4	BTG2
CTNNB12	6.16392616087946e-200	0.405626501416112	0.898	0.665	1.48143801350577e-195	CTB 4	CTNNB1
GAPDH1	2.93725741150989e-199	0.406282776491258	0.993	0.977	7.05940446282287e-195	CTB 4	GAPDH
TSPAN4	3.13000307285977e-198	0.273270885633188	0.433	0.173	7.52264938531117e-194	CTB 4	TSPAN4
ZFP362	5.55916947423319e-198	0.420696656944898	0.782	0.487	1.33609079143721e-193	CTB 4	ZFP36
DAPP1	1.13844074243788e-197	0.374454250555474	0.52	0.247	2.73612848037521e-193	CTB 4	DAPP1
PHLDA32	2.69700313191473e-197	0.359691390539588	0.656	0.344	6.48197732724386e-193	CTB 4	PHLDA3
EPPK1	3.48283733417417e-197	0.25101345164377	0.303	0.096	8.37065124895419e-193	CTB 4	EPPK1
GADD45B2	3.6797958821168e-195	0.529818860654598	0.789	0.527	8.84402142307952e-191	CTB 4	GADD45B
ZYX	3.97097872886743e-193	0.399640936312112	0.629	0.35	9.54385027695998e-189	CTB 4	ZYX
PAWR	6.0747124586476e-193	0.428141354133118	0.732	0.467	1.45999639231137e-188	CTB 4	PAWR
VMP11	6.14117712469384e-193	0.464092030803309	0.773	0.511	1.47597051014892e-188	CTB 4	VMP1
AKAP12	9.4255254194425e-193	0.623005137887865	0.332	0.12	2.26533077930881e-188	CTB 4	AKAP12
SKIL1	2.78492363514264e-192	0.451026507814318	0.653	0.375	6.69328546470182e-188	CTB 4	SKIL
RPL8	3.59151763538991e-192	0.260137466102901	0.995	0.99	8.63185348489612e-188	CTB 4	RPL8
OLR11	8.89528374227062e-192	0.2961002717228	0.754	0.41	2.13789249461732e-187	CTB 4	OLR1
CLIC4	7.84296538218962e-191	0.419007091729848	0.881	0.648	1.88497829995545e-186	CTB 4	CLIC4
ERP271	2.57081424308876e-190	0.289212110063253	0.439	0.183	6.17869495183953e-186	CTB 4	ERP27
CYBA	5.86445741100275e-189	0.322255439226471	0.426	0.175	1.4094636941604e-184	CTB 4	CYBA
FRMD61	1.80922073763691e-188	0.295474054720368	0.428	0.173	4.34828112083656e-184	CTB 4	FRMD6
PIEZO1	5.63759967709122e-188	0.288702192678317	0.434	0.181	1.3549407063921e-183	CTB 4	PIEZO1
GSN	3.29224248994115e-185	0.400493719154637	0.833	0.607	7.91257560032456e-181	CTB 4	GSN
HSPA22	1.12130032697347e-184	0.387245491229253	0.763	0.471	2.69493320584803e-180	CTB 4	HSPA2
TOB12	6.64857658350025e-184	0.259222833441039	0.437	0.176	1.59791889607845e-179	CTB 4	TOB1
ITGB42	1.18513342735643e-183	0.376008548158056	0.773	0.455	2.84834967930844e-179	CTB 4	ITGB4
ENAH1	2.74897249673258e-183	0.322444726143477	0.521	0.237	6.60688049864708e-179	CTB 4	ENAH
AK41	2.9987666755517e-182	0.255282626494885	0.312	0.107	7.20723582802096e-178	CTB 4	AK4
MCL12	4.75324565870776e-182	0.41972841825374	0.904	0.736	1.14239506161382e-177	CTB 4	MCL1
C4BPB	1.08969683815174e-181	0.268756900959487	0.28	0.089	2.61897738081389e-177	CTB 4	C4BPB
COL12A1	4.29333801504544e-181	0.29823332408235	0.35	0.131	1.03186085853602e-176	CTB 4	COL12A1
ZNF3951	2.17489257755875e-180	0.395122712447604	0.546	0.275	5.2271368209047e-176	CTB 4	ZNF395
SIPA1L1	1.86879889903833e-179	0.269889088686248	0.397	0.158	4.49147127394872e-175	CTB 4	SIPA1L1
H3F3B2	2.66599837401696e-179	0.312082167660379	0.984	0.95	6.40746049211237e-175	CTB 4	H3F3B
TIMP11	4.36512148419353e-179	0.528035797103985	0.761	0.481	1.04911329751107e-174	CTB 4	TIMP1
FN1	6.57352477216818e-177	0.417624766554974	1	0.958	1.5798809437429e-172	CTB 4	FN1
SLC16A11	6.80789730164861e-177	0.36675069772479	0.735	0.447	1.63621003747823e-172	CTB 4	SLC16A1
SEPT71	3.0122322908401e-174	0.360143040185103	0.865	0.656	7.23959908780509e-170	CTB 4	SEPT7
KLF42	6.06275798490784e-173	0.48458937746635	0.862	0.656	1.45712325409275e-168	CTB 4	KLF4
ARHGAP292	7.27382653659396e-173	0.356026188684416	0.743	0.444	1.74819146980499e-168	CTB 4	ARHGAP29
CNN2	7.70632069281578e-173	0.377582518774857	0.599	0.334	1.85213711531134e-168	CTB 4	CNN2
BLCAP1	8.13527131660669e-171	0.326766508253172	0.651	0.367	1.95523110823325e-166	CTB 4	BLCAP
AHNAK3	1.83062813862326e-170	0.367066143218588	0.977	0.873	4.39973166836715e-166	CTB 4	AHNAK
APBB2	1.01973196143056e-169	0.253556825616911	0.41	0.17	2.45082379610221e-165	CTB 4	APBB2
TUBA1A	1.17363914303095e-169	0.307735998974459	0.269	0.089	2.82072431636059e-165	CTB 4	TUBA1A
AC245041.21	5.64757021613629e-169	0.304168964347979	0.589	0.308	1.3573370257462e-164	CTB 4	AC245041.2
ENO1	1.71999133453492e-167	0.449535155304553	0.965	0.873	4.13382717342123e-163	CTB 4	ENO1
MYC1	4.76509613948909e-167	0.366085255830825	0.407	0.176	1.14524320616481e-162	CTB 4	MYC
PNCK1	4.98724701100856e-166	0.299449219093078	0.516	0.247	1.1986349466258e-161	CTB 4	PNCK
RAB252	3.44120373723053e-165	0.329034622001624	0.62	0.336	8.27058906205987e-161	CTB 4	RAB25
PPFIBP12	4.84116015602414e-164	0.312993351570743	0.716	0.427	1.16352443189884e-159	CTB 4	PPFIBP1
HEG1	1.37083375220656e-163	0.364109977346085	0.627	0.349	3.29466184005324e-159	CTB 4	HEG1
GTF2I2	3.90930316257416e-163	0.359396297153712	0.839	0.582	9.39561922093074e-159	CTB 4	GTF2I
ZNF4312	6.27195211009498e-163	0.315926534957367	0.58	0.305	1.50740097014023e-158	CTB 4	ZNF431
ANXA3	1.45919126594769e-162	0.405260243556462	0.684	0.428	3.50702028857869e-158	CTB 4	ANXA3
DDIT41	5.51083707046154e-162	0.495104266719213	0.426	0.194	1.32447458151473e-157	CTB 4	DDIT4
RRAS	5.87243838552887e-160	0.341496345335845	0.537	0.288	1.41138184157801e-155	CTB 4	RRAS
DUSP11	9.54574070752874e-159	0.418228587631018	0.954	0.871	2.29422332164746e-154	CTB 4	DUSP1
SDC41	1.12574572093665e-156	0.345911513980154	0.843	0.59	2.70561726569914e-152	CTB 4	SDC4
PDLIM5	1.20532460530244e-156	0.388299205774704	0.77	0.52	2.89687715638388e-152	CTB 4	PDLIM5
RPL36A2	2.69724505086337e-156	0.512818770917003	0.756	0.498	6.48255875524501e-152	CTB 4	RPL36A
DSG21	3.56769490813665e-156	0.360020581818494	0.893	0.692	8.57459794221562e-152	CTB 4	DSG2
CLU2	4.29330840802291e-154	0.529369412048742	0.739	0.461	1.03185374278423e-149	CTB 4	CLU
TPM4	5.75386219314734e-154	0.380946935386679	0.931	0.82	1.38288323950103e-149	CTB 4	TPM4
PYGL1	1.18632097147308e-153	0.333330928064481	0.686	0.425	2.85120382283841e-149	CTB 4	PYGL
UGCG	2.24066300650343e-153	0.364803368069299	0.666	0.396	5.38520946983035e-149	CTB 4	UGCG
ANKLE2	2.97520691662422e-153	0.336969687497257	0.613	0.355	7.15061230341464e-149	CTB 4	ANKLE2
CDKN1A1	4.08456830036163e-153	0.36487773241189	0.635	0.372	9.81685145308914e-149	CTB 4	CDKN1A
MET2	4.41583643427205e-153	0.283000505481933	0.701	0.395	1.06130212861294e-148	CTB 4	MET
AGR31	4.67165125540274e-153	0.352369563416925	0.273	0.094	1.12278466272349e-148	CTB 4	AGR3
C16orf74	1.93500575421418e-152	0.298412425447787	0.451	0.215	4.65059282967837e-148	CTB 4	C16orf74
CD551	5.70955842095732e-152	0.345381072919709	0.919	0.76	1.37223527089288e-147	CTB 4	CD55
CAST1	1.00285872398692e-151	0.315459686300375	0.932	0.794	2.41027065723017e-147	CTB 4	CAST
CRIM12	3.3792334082568e-151	0.349729765718666	0.896	0.697	8.1216495734044e-147	CTB 4	CRIM1
SSFA2	3.6174359905702e-151	0.37260061504224	0.731	0.484	8.69414565973642e-147	CTB 4	SSFA2
S100A13	4.22225963119351e-151	0.386815040121409	0.79	0.567	1.01477787976105e-146	CTB 4	S100A13
NDFIP2	1.12927721972743e-149	0.342966576035999	0.751	0.516	2.7141048698929e-145	CTB 4	NDFIP2
ETS2	4.15575088736321e-149	0.344090942341884	0.705	0.445	9.98793168268874e-145	CTB 4	ETS2
MPDZ2	1.07439588283754e-148	0.285117979103844	0.539	0.278	2.58220306481175e-144	CTB 4	MPDZ
MME2	4.14643761614903e-148	0.347582755081312	0.857	0.567	9.96554816665258e-144	CTB 4	MME
HSPH1	5.39605704870508e-147	0.423481226354853	0.657	0.422	1.29688835108578e-142	CTB 4	HSPH1
RASAL2	7.16741468207711e-147	0.315373563850464	0.539	0.293	1.72261644469041e-142	CTB 4	RASAL2
TPI11	1.11930389207005e-145	0.360863777408898	0.95	0.845	2.69013497420115e-141	CTB 4	TPI1
SPARC	1.34729311060646e-145	0.28480885846241	0.939	0.673	3.23808426203156e-141	CTB 4	SPARC
FABP52	2.42413824597439e-145	0.282105247096239	0.536	0.265	5.82617386037485e-141	CTB 4	FABP5
SLC6A81	2.4645317379103e-145	0.346017750259282	0.673	0.409	5.92325557889362e-141	CTB 4	SLC6A8
MYADM	7.497813114698e-144	0.362446356407785	0.871	0.642	1.80202440398652e-139	CTB 4	MYADM
RARRES31	3.4394066027022e-143	0.498724018996294	0.477	0.239	8.26626982893447e-139	CTB 4	RARRES3
MZT2A1	6.26192037817312e-143	0.294647268485008	0.604	0.341	1.50498994369013e-138	CTB 4	MZT2A
PKP21	2.00575090053396e-142	0.31490522306972	0.884	0.648	4.82062171434332e-138	CTB 4	PKP2
RNF19A	9.18809823432492e-142	0.273065394749463	0.547	0.295	2.20826752963765e-137	CTB 4	RNF19A
SLC1A61	5.17655440571621e-137	0.343789720961829	0.497	0.258	1.24413308586983e-132	CTB 4	SLC1A6
CAPN61	1.25769950481364e-136	0.334357420084734	0.576	0.316	3.02275498986911e-132	CTB 4	CAPN6
DAAM11	4.63179060199847e-136	0.314598868476263	0.658	0.407	1.11320455328431e-131	CTB 4	DAAM1
ERO1A1	2.57131216296037e-135	0.416895405859777	0.584	0.353	6.17989165245895e-131	CTB 4	ERO1A
IDS	3.39916483236519e-135	0.322988672557177	0.561	0.325	8.16955275810649e-131	CTB 4	IDS
BCAT12	3.66789895086439e-135	0.290604852035291	0.683	0.41	8.81542833850748e-131	CTB 4	BCAT1
IGF2BP2	4.23382727291799e-135	0.314187934441573	0.62	0.374	1.01755804677311e-130	CTB 4	IGF2BP2
NEBL1	2.18947239183387e-133	0.296900484270135	0.524	0.281	5.26217794653353e-129	CTB 4	NEBL
TRAM21	7.75177597737786e-133	0.338315243765479	0.641	0.398	1.863061838403e-128	CTB 4	TRAM2
GBP22	1.00366255828609e-132	0.289432023815987	0.575	0.312	2.4122025925848e-128	CTB 4	GBP2
FOSB1	6.41727659604869e-132	0.411102040187795	0.955	0.903	1.54232825709434e-127	CTB 4	FOSB
TXN	4.93310673406258e-131	0.291911381975223	0.952	0.861	1.1856228724646e-126	CTB 4	TXN
BHLHE402	7.16636150547634e-130	0.279123875866688	0.551	0.301	1.72236332422618e-125	CTB 4	BHLHE40
CD59	7.66497962727253e-130	0.306092103522671	0.915	0.764	1.84220120361868e-125	CTB 4	CD59
PLAUR	1.73031032429085e-129	0.265728109740894	0.342	0.151	4.15862783340064e-125	CTB 4	PLAUR
DPP72	2.11740554451738e-129	0.317245222533048	0.603	0.356	5.08897248569308e-125	CTB 4	DPP7
VCL	3.82489373259613e-129	0.381707841560894	0.708	0.495	9.19274959692154e-125	CTB 4	VCL
SPTLC2	6.29556101935664e-128	0.25575498782042	0.478	0.251	1.51307513539218e-123	CTB 4	SPTLC2
MFSD12	6.61642782257036e-128	0.315158861355703	0.686	0.445	1.59019226287656e-123	CTB 4	MFSD12
MXRA82	2.17774664165143e-127	0.267548359316568	0.636	0.36	5.23399627854505e-123	CTB 4	MXRA8
FNBP1L2	4.64761986485181e-127	0.304174195554341	0.749	0.51	1.11700895831848e-122	CTB 4	FNBP1L
NLRP22	4.77948286515778e-127	0.328956377261029	0.738	0.498	1.14870091181202e-122	CTB 4	NLRP2
ANO6	5.18813238546809e-127	0.290804875890141	0.692	0.45	1.2469157375234e-122	CTB 4	ANO6
LASP1	2.92007035494511e-126	0.309366022304843	0.615	0.377	7.01809709107508e-122	CTB 4	LASP1
LPP	1.28895158778283e-125	0.321690967576689	0.534	0.303	3.09786624607726e-121	CTB 4	LPP
APP1	1.75753953492237e-125	0.293383488434635	0.879	0.701	4.22407051823243e-121	CTB 4	APP
ACTN4	6.9970578759307e-124	0.344753174061747	0.88	0.718	1.68167288990118e-119	CTB 4	ACTN4
PPP1R13L	8.09888357149321e-124	0.287642173241718	0.668	0.431	1.94648567757268e-119	CTB 4	PPP1R13L
XAGE33	1.3445812765998e-123	0.355444796740609	0.94	0.796	3.23156664017995e-119	CTB 4	XAGE3
TRIML2	3.3422044586574e-123	0.267146320722454	0.409	0.198	8.03265419593719e-119	CTB 4	TRIML2
MUC1	8.38240106590883e-123	0.26289898058861	0.261	0.1	2.01462627218053e-118	CTB 4	MUC1
KRT19	8.94766083541488e-123	0.288955982938086	0.997	0.918	2.15048080518361e-118	CTB 4	KRT19
PLA2G162	1.02010369961066e-122	0.291708770873753	0.834	0.585	2.45171723164427e-118	CTB 4	PLA2G16
EGR11	1.0553053181081e-122	0.440414305186757	0.885	0.762	2.536320801541e-118	CTB 4	EGR1
RFK2	1.3163487081265e-122	0.304075832936584	0.781	0.544	3.16371248511123e-118	CTB 4	RFK
UPK1B	3.27310510333033e-121	0.403455437361438	0.536	0.3	7.86658080534412e-117	CTB 4	UPK1B
CALM12	3.95245079134318e-121	0.257424321008947	0.962	0.883	9.49932023191419e-117	CTB 4	CALM1
DNAJB12	5.5990213226823e-121	0.36863288193584	0.858	0.696	1.34566878469346e-116	CTB 4	DNAJB1
S100A61	4.42860774319933e-120	0.464010965517743	0.963	0.907	1.06437158500053e-115	CTB 4	S100A6
PTS1	1.26092522689441e-119	0.3109841962235	0.669	0.437	3.03050769031802e-115	CTB 4	PTS
HSPA1B2	2.21618729420115e-119	0.440270033535835	0.713	0.492	5.32638454288305e-115	CTB 4	HSPA1B
DSP2	6.47213109759359e-119	0.268885437806405	0.984	0.902	1.55551198799564e-114	CTB 4	DSP
DDR11	7.43972287169675e-119	0.253965155380405	0.569	0.327	1.7880629949836e-114	CTB 4	DDR1
CAV2	9.49130256860818e-119	0.32618408928255	0.631	0.395	2.28113965933929e-114	CTB 4	CAV2
TMEM1411	1.86364191300603e-118	0.319978266343178	0.655	0.418	4.47907697371869e-114	CTB 4	TMEM141
ZFP36L11	1.21562199246675e-117	0.377315498963877	0.971	0.875	2.92162589669458e-113	CTB 4	ZFP36L1
PROSER2-AS1	3.23480127324844e-117	0.271976606364624	0.373	0.178	7.77452138012531e-113	CTB 4	PROSER2-AS1
DNAJC15	5.31331162534501e-117	0.325689969729871	0.794	0.608	1.27700131603542e-112	CTB 4	DNAJC15
AC020916.11	3.02529061288109e-116	0.310222807918019	0.606	0.371	7.2709834589984e-112	CTB 4	AC020916.1
FOS1	1.65449638136807e-115	0.251167544695069	0.995	0.981	3.97641660298001e-111	CTB 4	FOS
GBP1	2.76204147884785e-115	0.435105489969572	0.523	0.306	6.63829049026292e-111	CTB 4	GBP1
SNX22	3.66789551966978e-115	0.318498304920656	0.766	0.556	8.81542009197435e-111	CTB 4	SNX2
DEPP12	1.72809161909164e-114	0.329480703609777	0.48	0.254	4.15329539732484e-110	CTB 4	DEPP1
BNIP3L1	1.02956913605786e-113	0.305205990463447	0.697	0.471	2.47446646160146e-109	CTB 4	BNIP3L
HSPA1A2	1.09050165959287e-113	0.634434686696571	0.668	0.472	2.62091168866551e-109	CTB 4	HSPA1A
IRS21	5.86380448800212e-113	0.299434753862995	0.539	0.311	1.40930677064643e-108	CTB 4	IRS2
CXCL21	3.45310133857368e-111	0.435266089385561	0.32	0.143	8.29918375712797e-107	CTB 4	CXCL2
CLTB	4.58471580643276e-111	0.255644490959595	0.955	0.805	1.10189059691805e-106	CTB 4	CLTB
MT2A	1.72396290982799e-110	0.684968891243945	0.743	0.498	4.14337245748058e-106	CTB 4	MT2A
CAVIN3	1.19947964924846e-109	0.252037728647438	0.348	0.165	2.88282938900375e-105	CTB 4	CAVIN3
IER32	8.14238268709396e-109	0.322687068801198	0.504	0.286	1.95694025501616e-104	CTB 4	IER3
PLEKHA51	1.48117187023499e-108	0.279365026560624	0.658	0.427	3.55984847292277e-104	CTB 4	PLEKHA5
SMARCA12	3.18134775402832e-108	0.270420005592625	0.749	0.51	7.64605119203167e-104	CTB 4	SMARCA1
RPS191	3.92047964882807e-108	0.259021026213729	0.988	0.984	9.42248078799338e-104	CTB 4	RPS19
CARHSP12	9.00182134829163e-108	0.271064342373619	0.793	0.576	2.16349774284841e-103	CTB 4	CARHSP1
CAV1	1.06294849259333e-107	0.436983252346618	0.718	0.496	2.5546904070988e-103	CTB 4	CAV1
GLS	1.27574911083613e-107	0.27671120778107	0.516	0.3	3.06613541298356e-103	CTB 4	GLS
SERTAD12	8.86356279656929e-107	0.310818164598153	0.727	0.522	2.13026868252746e-102	CTB 4	SERTAD1
HES12	1.22404672774262e-106	0.432206442578577	0.69	0.474	2.94187390545661e-102	CTB 4	HES1
NR3C11	9.18593566967945e-106	0.270448532067105	0.62	0.39	2.20774777885076e-101	CTB 4	NR3C1
BACH11	1.01687230827099e-105	0.26166931597008	0.575	0.357	2.4439509056985e-101	CTB 4	BACH1
CDC42EP3	1.254985142982e-105	0.262291122997906	0.561	0.339	3.01623129264294e-101	CTB 4	CDC42EP3
TUBB6	4.23958608879958e-105	0.286477586813061	0.675	0.455	1.01894212058209e-100	CTB 4	TUBB6
CALM21	6.36496912599706e-105	0.253108028806182	0.923	0.787	1.52975667974213e-100	CTB 4	CALM2
STAT1	7.13771974876796e-105	0.349032694981733	0.674	0.464	1.71547956441889e-100	CTB 4	STAT1
SLC38A21	8.57619731082063e-105	0.298006108968609	0.77	0.561	2.06120326168263e-100	CTB 4	SLC38A2
CLIC11	3.08684737751796e-104	0.271516531920272	0.898	0.812	7.41892898712666e-100	CTB 4	CLIC1
MAP4K4	6.96857195846876e-104	0.262154920903814	0.488	0.278	1.67482658449838e-99	CTB 4	MAP4K4
YWHAQ	1.29472659378133e-103	0.293736647599235	0.845	0.677	3.11174589549404e-99	CTB 4	YWHAQ
HYI	3.72133845748373e-103	0.27645998120891	0.557	0.346	8.94386484871639e-99	CTB 4	HYI
KTN11	1.36357297972001e-102	0.268486985455396	0.931	0.84	3.27721129945906e-98	CTB 4	KTN1
NPEPPS2	2.87977375448678e-102	0.255853715630905	0.742	0.515	6.92124824153353e-98	CTB 4	NPEPPS
RPL261	7.66466527783015e-100	0.280238636103206	0.975	0.962	1.8421256528737e-95	CTB 4	RPL26
RPS4Y12	2.95989220806227e-99	0.28714160445502	0.734	0.492	7.11380493285687e-95	CTB 4	RPS4Y1
RBM3	4.47441464284652e-99	0.265715511102246	0.869	0.731	1.07538081526173e-94	CTB 4	RBM3
BAMBI1	2.5682535440396e-97	0.27912400011129	0.441	0.247	6.17254056774477e-93	CTB 4	BAMBI
HELZ1	3.27564393699846e-97	0.281739129853948	0.654	0.444	7.87268263818209e-93	CTB 4	HELZ
GALNT6	5.0339001414664e-97	0.272340272471334	0.67	0.444	1.20984756000003e-92	CTB 4	GALNT6
PALLD	3.28554757283828e-96	0.332370219304346	0.78	0.588	7.89648503655953e-92	CTB 4	PALLD
AKAP131	9.65409504547533e-95	0.272001170084603	0.714	0.512	2.32026520322954e-90	CTB 4	AKAP13
XAF1	1.32481492944318e-94	0.262008937523377	0.387	0.204	3.18406020142373e-90	CTB 4	XAF1
CALD1	5.16762276248094e-94	0.345681139641735	0.936	0.839	1.24198645473467e-89	CTB 4	CALD1
DOCK5	3.05646553411889e-93	0.274466930019222	0.791	0.573	7.34590926470133e-89	CTB 4	DOCK5
LAMC1	1.15513419000249e-92	0.269400984471634	0.764	0.572	2.77624951225199e-88	CTB 4	LAMC1
JUP1	2.04156270241474e-92	0.269742973771054	0.772	0.571	4.90669179898358e-88	CTB 4	JUP
UBASH3B	1.44078133764987e-91	0.268495853564892	0.667	0.467	3.46277386690769e-87	CTB 4	UBASH3B
DARS1	1.75360348872441e-90	0.257491802726786	0.71	0.503	4.21461062480024e-86	CTB 4	DARS
LY6E2	1.97210456133611e-89	0.252411351616815	0.95	0.848	4.73975610271521e-85	CTB 4	LY6E
BZW1	2.93001097867914e-89	0.264281631100628	0.865	0.708	7.04198838615744e-85	CTB 4	BZW1
SLC2A11	3.59548753410083e-89	0.373961727113753	0.896	0.777	8.64139473945794e-85	CTB 4	SLC2A1
IER51	3.28939107965309e-88	0.259661219160404	0.707	0.508	7.90572252083824e-84	CTB 4	IER5
FLNB	1.33598558674753e-87	0.255769650792083	0.904	0.695	3.21090775918901e-83	CTB 4	FLNB
ISG15	1.55925091912426e-87	0.261346188906433	0.882	0.652	3.74750365902325e-83	CTB 4	ISG15
CAVIN1	2.10338893941535e-86	0.257356474494106	0.743	0.506	5.05528497699084e-82	CTB 4	CAVIN1
AMOTL21	2.29096483633378e-85	0.255249809672426	0.675	0.465	5.50610488764462e-81	CTB 4	AMOTL2
AP2S1	5.06526072692471e-84	0.26115835061428	0.788	0.629	1.21738476310909e-79	CTB 4	AP2S1
NAV21	3.11806410699296e-83	0.272598753672024	0.691	0.484	7.49395527474688e-79	CTB 4	NAV2
RPS171	3.21734623645817e-82	0.288785169325244	0.603	0.41	7.73256994470357e-78	CTB 4	RPS17
TPM1	1.03543738378535e-81	0.273815009125896	0.986	0.816	2.48857020818971e-77	CTB 4	TPM1
CST32	1.23244957785624e-80	0.297865977360026	0.821	0.646	2.96206931541969e-76	CTB 4	CST3
IFRD12	4.41234906710602e-79	0.262412808287098	0.636	0.444	1.06046397478826e-74	CTB 4	IFRD1
KLF51	2.56149648925067e-77	0.269866274723418	0.755	0.58	6.15630066226505e-73	CTB 4	KLF5
CAMK2N1	3.90045002983495e-74	0.278572724831763	0.48	0.293	9.37434160170531e-70	CTB 4	CAMK2N1
IFI27	1.02144060323698e-73	0.559989808240939	0.471	0.301	2.45493034581976e-69	CTB 4	IFI27
MYO10	4.64887709110445e-71	0.253793168761383	0.43	0.266	1.11731112007604e-66	CTB 4	MYO10
CITED21	8.51469399799136e-71	0.290105086846328	0.886	0.712	2.04642155547724e-66	CTB 4	CITED2
LIMCH11	4.40399590153866e-70	0.292606324137069	0.472	0.308	1.0584563749758e-65	CTB 4	LIMCH1
TYMP	5.81054066871984e-70	0.269955078033372	0.563	0.38	1.39650534432013e-65	CTB 4	TYMP
SCD	6.83092549919889e-69	0.289480266867691	0.353	0.197	1.64174463447746e-64	CTB 4	SCD
TPM2	5.28624874785714e-68	0.460447563702966	0.338	0.201	1.27049702405998e-63	CTB 4	TPM2
GPC4	2.27641381417739e-67	0.265428676854094	0.371	0.219	5.47113296099393e-63	CTB 4	GPC4
KLF6	2.56036686416608e-63	0.260278419350307	0.919	0.762	6.15358572133676e-59	CTB 4	KLF6
RRAD	2.86077903047477e-60	0.352361010083869	0.576	0.399	6.87559632184306e-56	CTB 4	RRAD
RPL171	3.87782667803852e-60	0.322890177571507	0.451	0.303	9.31996863799778e-56	CTB 4	RPL17
HILPDA1	4.63943262107942e-59	0.375795718459428	0.555	0.412	1.11504123615023e-54	CTB 4	HILPDA
BNIP31	1.01198706588501e-50	0.292796389127529	0.596	0.458	2.43220971414802e-46	CTB 4	BNIP3
NFKBIA2	9.03130538586369e-50	0.258347229704268	0.822	0.716	2.17058393643848e-45	CTB 4	NFKBIA
HLA-B	5.18147622607528e-43	0.392011415298653	0.256	0.148	1.24531599617493e-38	CTB 4	HLA-B
RPS101	2.49703182262434e-33	0.290682092255292	0.809	0.735	6.00136628249535e-29	CTB 4	RPS10
LGALS1	7.05673725407327e-18	0.466648089492134	0.38	0.305	1.69601623164397e-13	CTB 4	LGALS1
CGA	0	3.77737324455139	0.618	0.137	0	STB Precursor	CGA
CYP19A1	0	2.31334319980743	0.662	0.081	0	STB Precursor	CYP19A1
LCMT1-AS2	0	2.11234924819698	0.556	0.085	0	STB Precursor	LCMT1-AS2
INSL41	0	2.02922454454649	0.572	0.095	0	STB Precursor	INSL4
ERVFRD-1	0	2.00083464337614	0.366	0.008	0	STB Precursor	ERVFRD-1
GADD45G	0	1.93275693841331	0.673	0.136	0	STB Precursor	GADD45G
HSD17B11	0	1.76443005617586	0.688	0.295	0	STB Precursor	HSD17B1
SLC40A12	0	1.73713004558134	0.788	0.325	0	STB Precursor	SLC40A1
TFRC2	0	1.56328009335118	0.817	0.426	0	STB Precursor	TFRC
PLAC4	0	1.54669236585805	0.389	0.064	0	STB Precursor	PLAC4
TBX31	0	1.49490798216048	0.72	0.231	0	STB Precursor	TBX3
TACC21	0	1.277179705123	0.671	0.246	0	STB Precursor	TACC2
SLC22A111	0	1.24694573323155	0.675	0.234	0	STB Precursor	SLC22A11
RHOBTB11	0	1.23663367706308	0.538	0.148	0	STB Precursor	RHOBTB1
SLC13A41	0	1.23431702979015	0.535	0.151	0	STB Precursor	SLC13A4
CSF3R2	0	1.19271396538076	0.846	0.414	0	STB Precursor	CSF3R
GSTA31	0	1.04302475538267	0.458	0.107	0	STB Precursor	GSTA3
FAM184A1	0	1.01493852196031	0.463	0.117	0	STB Precursor	FAM184A
SLC52A11	0	0.954965576033037	0.547	0.154	0	STB Precursor	SLC52A1
NECTIN3	0	0.883991797286731	0.367	0.069	0	STB Precursor	NECTIN3
GLDN	0	0.709725732993307	0.285	0.028	0	STB Precursor	GLDN
ARG2	0	0.686895423221035	0.284	0.042	0	STB Precursor	ARG2
AC010328.1	0	0.643883624176628	0.256	0.016	0	STB Precursor	AC010328.1
SLC43A21	2.13205379020697e-307	1.11809804201753	0.676	0.26	5.12417807938344e-303	STB Precursor	SLC43A2
ESRRG	4.17529842659036e-304	0.773232700195795	0.372	0.074	1.00349122384673e-299	STB Precursor	ESRRG
BTG31	5.18268125175015e-303	1.60214180720115	0.717	0.325	1.24560561204563e-298	STB Precursor	BTG3
DAB22	1.28222749515688e-299	1.61035047979432	0.699	0.308	3.08170556186004e-295	STB Precursor	DAB2
SVEP11	8.39000765710857e-290	1.1683154617675	0.504	0.143	2.01645444030947e-285	STB Precursor	SVEP1
ST3GAL4	8.40015974487412e-283	1.10877814412718	0.558	0.197	2.01889439308305e-278	STB Precursor	ST3GAL4
MLLT12	9.56039361387596e-283	1.11257712647637	0.767	0.381	2.29774500115895e-278	STB Precursor	MLLT1
HSPB8	6.70908324479943e-264	1.15093991049941	0.707	0.357	1.61246106705509e-259	STB Precursor	HSPB8
SQSTM11	2.09130259575065e-260	1.17072129259474	0.907	0.824	5.0262366586271e-256	STB Precursor	SQSTM1
SEMA6A2	1.69338497699895e-253	0.915693735157536	0.655	0.274	4.06988145371927e-249	STB Precursor	SEMA6A
PRKCZ1	6.48075536474376e-253	1.27220706806762	0.614	0.278	1.55758474436252e-248	STB Precursor	PRKCZ
CRYBG11	2.28774585410661e-250	1.07011312874177	0.628	0.26	5.49836838575983e-246	STB Precursor	CRYBG1
SLC26A21	2.75814388323952e-246	1.55240992525649	0.593	0.243	6.62892300897785e-242	STB Precursor	SLC26A2
MALAT1	1.58287323824493e-235	0.648708728026491	0.993	0.996	3.80427754079787e-231	STB Precursor	MALAT1
ERVW-11	6.34103438958155e-234	1.16639466008485	0.707	0.394	1.52400420519203e-229	STB Precursor	ERVW-1
KRT231	3.61652972661182e-230	1.40908028692285	0.776	0.503	8.69196754493884e-226	STB Precursor	KRT23
GABARAPL12	7.70304034533563e-226	0.987069011848955	0.8	0.549	1.85134871659796e-221	STB Precursor	GABARAPL1
EPHB4	9.45061780105876e-212	0.657175612675435	0.405	0.116	2.27136148230646e-207	STB Precursor	EPHB4
CCNDBP12	2.43364633305016e-207	1.0572163891558	0.731	0.455	5.84902559685275e-203	STB Precursor	CCNDBP1
CLIP11	1.27997217453627e-204	0.926006141233271	0.797	0.59	3.07628512428047e-200	STB Precursor	CLIP1
TMEM40	1.14946340041093e-203	0.863387598694589	0.618	0.298	2.76262033654764e-199	STB Precursor	TMEM40
S100P1	9.30411915052426e-203	0.653188836166238	0.965	0.891	2.236151996637e-198	STB Precursor	S100P
MUC152	5.58659570311286e-202	1.10252822605041	0.634	0.311	1.34268241128614e-197	STB Precursor	MUC15
PDCD41	2.75882470377192e-200	0.890247222228509	0.842	0.701	6.63055929304543e-196	STB Precursor	PDCD4
BCL2	6.08384444880995e-199	0.513329151073559	0.283	0.061	1.46219117482698e-194	STB Precursor	BCL2
SLC19A2	7.29018125430373e-199	0.595289670519604	0.351	0.094	1.75212216265936e-194	STB Precursor	SLC19A2
SPINT12	2.03743004138518e-196	0.869536491083453	0.86	0.609	4.89675936146513e-192	STB Precursor	SPINT1
ATG9B1	1.63872278832658e-191	0.724800101947845	0.43	0.144	3.93850634946411e-187	STB Precursor	ATG9B
ACSS11	8.791262003604e-190	0.722263507284033	0.514	0.183	2.11289190994619e-185	STB Precursor	ACSS1
ANXA13	1.617061717012e-181	0.804858612749505	0.984	0.968	3.88644613066665e-177	STB Precursor	ANXA1
KCNN42	1.86140394727317e-180	0.774345965135756	0.571	0.262	4.47369824687633e-176	STB Precursor	KCNN4
SIAH11	5.76644189787365e-177	0.859700162837245	0.544	0.246	1.38590664573495e-172	STB Precursor	SIAH1
BTG13	1.70638617633536e-172	0.691550567435827	0.902	0.799	4.10112853620442e-168	STB Precursor	BTG1
FAR2	1.08778348883359e-171	0.821870672976365	0.348	0.106	2.61437883706265e-167	STB Precursor	FAR2
SLC19A11	1.57179285150545e-171	0.625599055426232	0.34	0.095	3.77764693930819e-167	STB Precursor	SLC19A1
DUSP91	4.95277345513915e-168	0.954744291647984	0.689	0.399	1.19034957220814e-163	STB Precursor	DUSP9
AAK11	1.53522349724934e-161	0.726103380501633	0.837	0.732	3.68975615328908e-157	STB Precursor	AAK1
SECISBP2L	4.09698586585522e-158	1.05200741165691	0.636	0.405	9.84669582999643e-154	STB Precursor	SECISBP2L
GDF15	1.48222714641765e-157	1.57308305693949	0.654	0.389	3.56238472370018e-153	STB Precursor	GDF15
MT-CO31	6.34893221763501e-157	0.483682639848508	0.988	0.994	1.5259023691864e-152	STB Precursor	MT-CO3
PEG101	8.38166732114832e-155	1.15218043764543	0.831	0.603	2.01444992396479e-150	STB Precursor	PEG10
NFE2L31	4.49648529287509e-154	0.976471267006512	0.607	0.331	1.0806852752896e-149	STB Precursor	NFE2L3
EGFR3	4.25273343920596e-153	0.677365594622391	0.907	0.843	1.02210195477876e-148	STB Precursor	EGFR
EPS8L1	7.53299938649018e-152	0.842291861878311	0.559	0.296	1.81048107254905e-147	STB Precursor	EPS8L1
PEG33	2.39347315819176e-150	0.659229143538394	0.88	0.67	5.75247338839808e-146	STB Precursor	PEG3
MPP11	3.04901673826804e-150	0.831531508936333	0.506	0.224	7.32800682875342e-146	STB Precursor	MPP1
ANXA61	2.73873046097695e-147	0.701578547851651	0.433	0.168	6.582264789912e-143	STB Precursor	ANXA6
TINAGL12	1.6462158465056e-143	0.652335642169232	0.879	0.688	3.95651516549155e-139	STB Precursor	TINAGL1
S100A9	4.16434114942151e-140	1.42086910096083	0.475	0.221	1.00085775185197e-135	STB Precursor	S100A9
FAM13A	2.8690614936919e-139	0.815483754202683	0.598	0.349	6.8955023939391e-135	STB Precursor	FAM13A
SYT71	4.36305317415435e-139	0.464024131278341	0.311	0.092	1.04861619987626e-134	STB Precursor	SYT7
PKIB1	6.77928844964422e-138	0.841271632660959	0.636	0.36	1.62933418598749e-133	STB Precursor	PKIB
NUFIP21	6.98161995759796e-137	0.751793821860975	0.762	0.631	1.67796254060909e-132	STB Precursor	NUFIP2
SLC3A21	5.40113459501836e-134	0.687733109872455	0.731	0.568	1.29810868856671e-129	STB Precursor	SLC3A2
UBE2B	1.1312301701864e-132	0.734198443671785	0.704	0.56	2.71879859102598e-128	STB Precursor	UBE2B
TOP11	2.07030210989869e-130	0.746907009673145	0.758	0.637	4.97576409093052e-126	STB Precursor	TOP1
B3GNT5	5.76450338547136e-130	0.56124383338354	0.313	0.103	1.38544074366419e-125	STB Precursor	B3GNT5
DACT2	4.00150931442176e-128	0.595139297253782	0.362	0.135	9.61722748628125e-124	STB Precursor	DACT2
FAM89A2	5.10985349028867e-128	0.67175938766069	0.72	0.493	1.22810218785598e-123	STB Precursor	FAM89A
RASA11	5.244975418742e-126	0.622367207900554	0.809	0.708	1.26057739214045e-121	STB Precursor	RASA1
OVOL1	1.5021142591871e-120	0.60681477878262	0.354	0.137	3.61018141053028e-116	STB Precursor	OVOL1
EIF1	1.01477615312148e-119	0.41281046367305	0.984	0.984	2.43891300641216e-115	STB Precursor	EIF1
TCAF11	1.09213081506697e-118	0.997055562132663	0.636	0.437	2.62482720093195e-114	STB Precursor	TCAF1
MT-CO11	3.09549884401671e-118	0.40022876608004	0.988	0.995	7.43972192170976e-114	STB Precursor	MT-CO1
PNP1	3.90945239585585e-118	0.977279597408438	0.545	0.315	9.39597788819995e-114	STB Precursor	PNP
PGF	7.46687914028273e-117	0.880753439332407	0.725	0.511	1.79458973257555e-112	STB Precursor	PGF
RIPOR21	6.12890575625416e-116	0.773526608849365	0.318	0.115	1.47302120945813e-111	STB Precursor	RIPOR2
FXYD32	4.87981442636135e-114	0.949391751143911	0.659	0.455	1.17281459923169e-109	STB Precursor	FXYD3
NEAT12	2.58952336834847e-112	0.682444161441825	0.97	0.959	6.22366046348872e-108	STB Precursor	NEAT1
PHLDA21	5.25674013086191e-110	0.780176068059254	0.848	0.827	1.26340492305135e-105	STB Precursor	PHLDA2
EIF4G2	8.85817568765057e-110	0.520770357473876	0.889	0.871	2.12897394476994e-105	STB Precursor	EIF4G2
MORC42	2.15439377592612e-109	0.596228181912889	0.807	0.683	5.17787000106084e-105	STB Precursor	MORC4
RDH13	3.25666593937277e-109	0.603407051868929	0.458	0.227	7.82707091868853e-105	STB Precursor	RDH13
MBNL31	2.09129495493952e-108	0.699825175124675	0.64	0.414	5.02621829470165e-104	STB Precursor	MBNL3
NRP11	1.57545896586498e-107	0.505447047516784	0.361	0.138	3.78645807855989e-103	STB Precursor	NRP1
VSIR1	1.60662567879094e-107	0.764931952870418	0.491	0.266	3.86136415640615e-103	STB Precursor	VSIR
GSTA41	2.65899634746137e-107	0.571600133433466	0.364	0.15	6.39063182148865e-103	STB Precursor	GSTA4
APLP22	1.28431222342111e-106	0.485767605373982	0.859	0.712	3.08671599777029e-102	STB Precursor	APLP2
SLC19A3	1.66155645002869e-104	0.407097331057103	0.252	0.078	3.99338477199894e-100	STB Precursor	SLC19A3
SLC25A51	7.95921127851771e-104	0.696338783032521	0.734	0.604	1.91291683867895e-99	STB Precursor	SLC25A5
F52	6.47064234128687e-103	0.516973615668919	0.541	0.267	1.55515418030489e-98	STB Precursor	F5
SP6	1.67080010952758e-102	0.467247350266448	0.305	0.111	4.01560098323858e-98	STB Precursor	SP6
CLTA2	5.60063086065367e-101	0.491624114655641	0.851	0.824	1.3460556210495e-96	STB Precursor	CLTA
ALAS1	5.9204102667584e-101	0.536307657443464	0.407	0.19	1.42291140351271e-96	STB Precursor	ALAS1
LDHB1	2.31324096520813e-99	0.65269039500724	0.634	0.377	5.55964333578122e-95	STB Precursor	LDHB
APMAP2	4.08669869065753e-98	0.577210964040325	0.48	0.253	9.8219716331263e-94	STB Precursor	APMAP
ARID5B	4.98479405805268e-98	0.813964085166745	0.694	0.587	1.19804540391238e-93	STB Precursor	ARID5B
ATP10D1	5.71085995907712e-96	0.800603120363443	0.513	0.314	1.3725480825646e-91	STB Precursor	ATP10D
NEDD4L1	1.33725477712797e-94	0.576137565717239	0.458	0.239	3.21395813134936e-90	STB Precursor	NEDD4L
PIK3C2A	6.83134967255085e-93	0.705738022797524	0.527	0.342	1.64184658030087e-88	STB Precursor	PIK3C2A
KIAA0040	2.06479440889876e-92	0.746480726507262	0.45	0.244	4.96252688234728e-88	STB Precursor	KIAA0040
ISYNA12	5.34428431447317e-89	0.685891192831419	0.656	0.454	1.28444529214048e-84	STB Precursor	ISYNA1
BRAF	5.68423512533636e-88	0.593665784779859	0.37	0.175	1.36614907002334e-83	STB Precursor	BRAF
SMS1	1.36768847345616e-87	0.513450109511585	0.785	0.694	3.28710247710453e-83	STB Precursor	SMS
RBM471	6.34689299009797e-86	0.605274186640087	0.651	0.52	1.52541226124015e-81	STB Precursor	RBM47
MAP1LC3B	7.4563124467849e-86	0.581584568353123	0.72	0.625	1.79205013346028e-81	STB Precursor	MAP1LC3B
ATG2A	8.99966747820621e-86	0.402398473116895	0.276	0.106	2.16298008171208e-81	STB Precursor	ATG2A
TSC22D12	1.28882524466384e-85	0.54726701163343	0.862	0.842	3.09756259302506e-81	STB Precursor	TSC22D1
TKT2	1.50421122569217e-85	0.535881226263338	0.692	0.517	3.61522125982855e-81	STB Precursor	TKT
MSX21	3.27720485671366e-85	0.496023241365646	0.395	0.184	7.87643415262562e-81	STB Precursor	MSX2
PAGE42	5.79985693030864e-85	0.552355708885396	0.78	0.538	1.39393761463038e-80	STB Precursor	PAGE4
GABRE	1.98781155841254e-84	0.497910148435995	0.382	0.183	4.77750629948871e-80	STB Precursor	GABRE
RAI14	2.69798655239026e-84	0.708889002560123	0.605	0.455	6.48434088001476e-80	STB Precursor	RAI14
ZNF2921	1.25504563968028e-83	0.845681755504744	0.647	0.554	3.01637669040759e-79	STB Precursor	ZNF292
TINCR	3.22052928333144e-83	0.614457914314978	0.601	0.444	7.74022007955877e-79	STB Precursor	TINCR
PRRC2C	4.20209175319138e-82	0.444554385268921	0.834	0.811	1.00993073196202e-77	STB Precursor	PRRC2C
CDO12	7.73866968799339e-82	0.49974437010589	0.515	0.292	1.85991187281233e-77	STB Precursor	CDO1
SERPINF11	8.63031207811588e-82	0.505864399408883	0.461	0.228	2.07420920485437e-77	STB Precursor	SERPINF1
HEXIM1	1.36644853173951e-81	0.547276348374079	0.633	0.466	3.28412240118274e-77	STB Precursor	HEXIM1
MT-ND11	6.13908084294044e-81	0.27732272124296	0.986	0.994	1.47546668979231e-76	STB Precursor	MT-ND1
CEBPB	8.27801422832228e-81	0.545138675702026	0.86	0.793	1.98953793963498e-76	STB Precursor	CEBPB
ARL4A1	1.34815803199434e-80	0.648249291539548	0.402	0.209	3.2401630140952e-76	STB Precursor	ARL4A
H3F3B3	9.43872485561876e-80	0.345668790897514	0.967	0.952	2.26850313179941e-75	STB Precursor	H3F3B
PMAIP11	1.87513949658127e-79	0.653735773790065	0.503	0.285	4.50671026608344e-75	STB Precursor	PMAIP1
SCIN1	6.81591135326357e-77	0.578510727977984	0.35	0.167	1.63813613464337e-72	STB Precursor	SCIN
NUPR12	1.11131433904568e-76	0.730121469024187	0.538	0.343	2.67093288246238e-72	STB Precursor	NUPR1
HMOX1	2.73763933047826e-76	0.718113902515931	0.551	0.371	6.57964236687145e-72	STB Precursor	HMOX1
NCOA31	2.77322906519491e-76	0.603904658213179	0.625	0.484	6.66517873528944e-72	STB Precursor	NCOA3
SLC38A92	5.66364867103344e-76	0.574590332378256	0.511	0.333	1.36120132159618e-71	STB Precursor	SLC38A9
SIAH21	1.01952280877835e-75	0.549348878478714	0.419	0.226	2.45032111861787e-71	STB Precursor	SIAH2
COLEC121	1.63072230873526e-75	0.39851926501893	0.408	0.19	3.91927799681433e-71	STB Precursor	COLEC12
MTMR10	1.76860213154001e-74	0.444271075159384	0.279	0.117	4.25065836294327e-70	STB Precursor	MTMR10
MGST31	2.22989303665283e-73	0.456225984120368	0.896	0.901	5.35932492429142e-69	STB Precursor	MGST3
MT-CYB1	9.64113107718067e-73	0.280391583151312	0.988	0.993	2.3171494430896e-68	STB Precursor	MT-CYB
ID21	6.01934212012347e-72	0.529886459883647	0.346	0.166	1.44668868515048e-67	STB Precursor	ID2
MT-CO21	1.43608010535554e-69	0.264107698913759	0.987	0.994	3.45147492521151e-65	STB Precursor	MT-CO2
CYP11A1	1.66975355762085e-68	0.568709960124022	0.726	0.651	4.01308570038596e-64	STB Precursor	CYP11A1
PDLIM2	2.24638587307541e-68	0.676568311741349	0.579	0.446	5.39896380734945e-64	STB Precursor	PDLIM2
EEA11	3.29961984254601e-68	0.524310167479695	0.604	0.457	7.93030632957507e-64	STB Precursor	EEA1
DDX53	4.4083802132793e-68	0.346999112967415	0.919	0.923	1.05951010045955e-63	STB Precursor	DDX5
CD552	1.40446195980974e-67	0.418144373083706	0.837	0.77	3.37548387420672e-63	STB Precursor	CD55
SLC2A12	1.98080925966455e-67	0.545095614082833	0.811	0.785	4.76067697467778e-63	STB Precursor	SLC2A1
VAV31	3.10136798350286e-67	0.533109218503637	0.591	0.455	7.45382781155078e-63	STB Precursor	VAV3
PCOLCE21	3.96440755852761e-67	0.427974810278798	0.322	0.148	9.52805712616525e-63	STB Precursor	PCOLCE2
PIM3	2.74082535665096e-66	0.593839605274949	0.508	0.354	6.58729966217492e-62	STB Precursor	PIM3
PSMC11	7.72202780351324e-66	0.54071308406527	0.71	0.632	1.85591216229637e-61	STB Precursor	PSMC1
CPEB4	1.46896682498307e-65	0.615914004022241	0.476	0.315	3.53051486716432e-61	STB Precursor	CPEB4
TLK1	2.83580960375126e-65	0.518468678105679	0.581	0.452	6.81558480165577e-61	STB Precursor	TLK1
PAPOLA	1.34482430420991e-64	0.517534947082374	0.705	0.673	3.23215073273811e-60	STB Precursor	PAPOLA
AKAP9	6.72518069500993e-62	0.416626275935465	0.785	0.757	1.61632992823869e-57	STB Precursor	AKAP9
CYP2J2	8.83537926470352e-62	0.414927418122004	0.299	0.14	2.12349505247884e-57	STB Precursor	CYP2J2
SPAG91	1.07040434335381e-61	0.500993145023637	0.576	0.449	2.57260979881655e-57	STB Precursor	SPAG9
BPGM	2.61928564522645e-61	0.595509985010715	0.321	0.166	6.29519111973724e-57	STB Precursor	BPGM
TCF25	5.08240435488572e-61	0.456892085692556	0.695	0.655	1.22150506265323e-56	STB Precursor	TCF25
BACE2	6.01442239523003e-61	0.582096239629679	0.422	0.266	1.44550627846959e-56	STB Precursor	BACE2
GULP1	7.41973042269076e-61	0.548985896541169	0.388	0.228	1.7832580097895e-56	STB Precursor	GULP1
P2RY62	7.63248049077009e-60	0.463618451504333	0.4	0.23	1.83439036115168e-55	STB Precursor	P2RY6
ABHD5	1.11577807550108e-59	0.666173963502296	0.402	0.248	2.68166102665929e-55	STB Precursor	ABHD5
FDX1	1.33821742201052e-59	0.65784802666707	0.629	0.545	3.21627175206009e-55	STB Precursor	FDX1
RAB11A1	1.52781827483717e-58	0.509713300701849	0.678	0.614	3.67195844174364e-54	STB Precursor	RAB11A
DLG51	2.24286900996866e-58	0.49270023847726	0.457	0.299	5.39051137855867e-54	STB Precursor	DLG5
MAFF2	2.44300398724219e-58	0.505091740362796	0.657	0.549	5.87151578293788e-54	STB Precursor	MAFF
WSB12	8.31554500938423e-58	0.374814426104274	0.851	0.832	1.99855808755541e-53	STB Precursor	WSB1
PSMD71	3.8252270791204e-57	0.454624359897906	0.693	0.637	9.19355076195798e-53	STB Precursor	PSMD7
SYNE2	9.54051611587766e-57	0.411236590920584	0.823	0.808	2.29296764329004e-52	STB Precursor	SYNE2
MEST1	1.65946695105912e-56	0.576666851822605	0.501	0.329	3.98836287017549e-52	STB Precursor	MEST
EFEMP11	3.47478564582087e-56	0.406660741179618	0.683	0.529	8.35129982116589e-52	STB Precursor	EFEMP1
TET2	6.33962359268459e-56	0.420052705469005	0.405	0.241	1.52366513426581e-51	STB Precursor	TET2
HES13	2.45992500613741e-55	0.579110285672507	0.688	0.482	5.91218375975064e-51	STB Precursor	HES1
SAT1	2.87211119308178e-54	0.38600945281084	0.981	0.983	6.90283204145274e-50	STB Precursor	SAT1
ATP6V1E11	3.74455573396249e-54	0.459813834146246	0.668	0.587	8.99966525100545e-50	STB Precursor	ATP6V1E1
AK3	7.18119996947089e-54	0.496570862839869	0.374	0.22	1.72592960066263e-49	STB Precursor	AK3
CYSTM11	6.34590838183094e-53	0.370836803210822	0.338	0.171	1.52517562048925e-48	STB Precursor	CYSTM1
PSMB11	9.94464375983066e-53	0.358934638334241	0.816	0.818	2.3900956812377e-48	STB Precursor	PSMB1
C1orf211	2.10797945475191e-52	0.465745666247836	0.469	0.311	5.06631782155075e-48	STB Precursor	C1orf21
ADGRG12	5.92783705764839e-52	0.413836006957604	0.561	0.391	1.42469635843521e-47	STB Precursor	ADGRG1
RAB9A	1.38666397394173e-51	0.470805627623827	0.416	0.271	3.33270819497154e-47	STB Precursor	RAB9A
LGR41	2.25206799055569e-51	0.502111586502902	0.401	0.251	5.41262020850155e-47	STB Precursor	LGR4
TAX1BP1	3.99954947393802e-51	0.507089216690417	0.7	0.693	9.61251720566264e-47	STB Precursor	TAX1BP1
HSP90AA12	6.502585652761e-51	0.343280186342619	0.978	0.98	1.56283143578458e-46	STB Precursor	HSP90AA1
TMEM8A1	9.72940325735735e-51	0.520804908311683	0.442	0.298	2.33836477887326e-46	STB Precursor	TMEM8A
TMEM150A1	1.34834674637789e-49	0.359625429351224	0.282	0.14	3.24061657024462e-45	STB Precursor	TMEM150A
SIN3B	5.92065122591211e-49	0.485778888746737	0.395	0.256	1.42296931563572e-44	STB Precursor	SIN3B
MIR22HG1	7.0723340281086e-49	0.498112963757782	0.489	0.355	1.69976476031562e-44	STB Precursor	MIR22HG
EIF5	6.66573483945386e-48	0.356622021077947	0.769	0.757	1.60204271131434e-43	STB Precursor	EIF5
RPS6KA5	2.56049223947816e-46	0.390111197068507	0.35	0.203	6.15388704836182e-42	STB Precursor	RPS6KA5
FAM104A1	1.23264885280857e-45	0.449517071919028	0.418	0.285	2.96254825284011e-41	STB Precursor	FAM104A
EIF2S21	2.19866541584183e-45	0.411087085264544	0.854	0.868	5.28427246043425e-41	STB Precursor	EIF2S2
DEPP13	3.49644021694469e-45	0.455425173608324	0.42	0.265	8.40334441740487e-41	STB Precursor	DEPP1
DDIT32	3.8020740947989e-45	0.446930708027526	0.524	0.369	9.13790487943967e-41	STB Precursor	DDIT3
COBLL1	6.49240699977867e-45	0.52621080019126	0.747	0.747	1.56038509832681e-40	STB Precursor	COBLL1
STARD101	8.19394322663459e-45	0.39606069256198	0.635	0.582	1.96933231508936e-40	STB Precursor	STARD10
ETF1	2.84702987352586e-44	0.42884922672006	0.523	0.416	6.84255159803206e-40	STB Precursor	ETF1
UTRN2	5.84720961242991e-44	0.403400555381018	0.506	0.359	1.4053183582514e-39	STB Precursor	UTRN
TUSC31	8.67357835726947e-44	0.422636479146311	0.678	0.629	2.08460782238614e-39	STB Precursor	TUSC3
LRPAP12	1.25241253459846e-43	0.360424196713226	0.777	0.775	3.01004828565395e-39	STB Precursor	LRPAP1
RBBP71	1.6804308672527e-43	0.399295534812786	0.605	0.501	4.03874754635513e-39	STB Precursor	RBBP7
NFE2L22	8.48881586676846e-43	0.37369364523271	0.598	0.506	2.04020200541913e-38	STB Precursor	NFE2L2
ACADVL1	1.12031685824714e-42	0.438523896481295	0.593	0.519	2.69256953711117e-38	STB Precursor	ACADVL
VGLL11	4.25543381563962e-42	0.472766317902666	0.72	0.726	1.02275096325083e-37	STB Precursor	VGLL1
STS2	4.38569372799166e-42	0.379565577613772	0.354	0.21	1.05405763058552e-37	STB Precursor	STS
AVPI1	5.01805785780194e-42	0.287594583963002	0.268	0.136	1.20604002554412e-37	STB Precursor	AVPI1
GOLGB1	5.17405400254432e-42	0.330940028301296	0.832	0.841	1.2435321389715e-37	STB Precursor	GOLGB1
RIMKLB1	5.21825216174316e-42	0.514775763492684	0.416	0.287	1.25415472455335e-37	STB Precursor	RIMKLB
AP2A1	1.31838637579259e-41	0.468789548929813	0.397	0.276	3.16860981557992e-37	STB Precursor	AP2A1
AIG1	2.9495405369662e-41	0.302482568593357	0.256	0.131	7.08892572654456e-37	STB Precursor	AIG1
IQGAP21	1.46649566574965e-40	0.308402195674276	0.283	0.144	3.52457568306271e-36	STB Precursor	IQGAP2
EZR	1.74375191714514e-40	0.376784569477387	0.869	0.875	4.19093335766662e-36	STB Precursor	EZR
GNA12	2.18274634144981e-40	0.450471451689142	0.449	0.336	5.24601255704048e-36	STB Precursor	GNA12
ZFAT1	6.47927618975899e-40	0.431913273557147	0.407	0.282	1.55722923944668e-35	STB Precursor	ZFAT
ATP5F1B1	9.24213770184202e-40	0.346379834347404	0.702	0.673	2.22125537526071e-35	STB Precursor	ATP5F1B
ORMDL11	1.39373634047122e-39	0.439681109828316	0.478	0.366	3.34970592068853e-35	STB Precursor	ORMDL1
LYPD31	2.33458166282741e-39	0.495878623915044	0.396	0.27	5.6109335684394e-35	STB Precursor	LYPD3
TFAP2A1	2.36792476767176e-39	0.390908843134543	0.727	0.719	5.6910703866223e-35	STB Precursor	TFAP2A
AKR1B11	3.8497931220187e-39	0.446006050454163	0.687	0.66	9.25259278945974e-35	STB Precursor	AKR1B1
GGH1	6.32352718843163e-39	0.611681056843548	0.37	0.234	1.51979652446766e-34	STB Precursor	GGH
HSPD11	1.34280673365569e-38	0.381753838022477	0.725	0.7	3.22730170366808e-34	STB Precursor	HSPD1
ATP6V1C22	1.48808465390988e-38	0.303404670151028	0.337	0.196	3.576462657207e-34	STB Precursor	ATP6V1C2
PISD1	6.10966852777758e-38	0.406661963836111	0.338	0.209	1.46839773396606e-33	STB Precursor	PISD
OLR12	9.37466150895757e-38	0.535811818267519	0.544	0.432	2.25310614706286e-33	STB Precursor	OLR1
HSPE11	3.6129976831521e-37	0.371512203898398	0.682	0.642	8.68347863168775e-33	STB Precursor	HSPE1
NUDT42	7.34741371548533e-37	0.395769660735619	0.519	0.388	1.76587741237974e-32	STB Precursor	NUDT4
THSD7A1	2.31812692445099e-36	0.435043259680602	0.313	0.191	5.57138625022551e-32	STB Precursor	THSD7A
GOLGA4	3.38176767739876e-36	0.3405906334996	0.799	0.818	8.12774043586017e-32	STB Precursor	GOLGA4
MXD1	3.86926069522261e-36	0.437739142670248	0.348	0.23	9.29938115489803e-32	STB Precursor	MXD1
ATP6V1G1	7.17751099576651e-36	0.348462681191275	0.719	0.722	1.72504299272252e-31	STB Precursor	ATP6V1G1
SLC5A6	1.20441145313568e-35	0.397694962879626	0.414	0.304	2.8946824864663e-31	STB Precursor	SLC5A6
SLK1	2.10141381989296e-35	0.38967511101161	0.485	0.371	5.05053797473074e-31	STB Precursor	SLK
ARHGAP24	2.10406146618648e-35	0.342351581446251	0.267	0.152	5.05690132783259e-31	STB Precursor	ARHGAP24
GPC31	8.3791502229581e-35	0.553111240702854	0.306	0.188	2.01384496458575e-30	STB Precursor	GPC3
FOXO42	3.23240463699271e-34	0.39451730275931	0.529	0.4	7.76876130454828e-30	STB Precursor	FOXO4
CPPED11	3.34679789502225e-34	0.327040238723168	0.347	0.223	8.04369406089648e-30	STB Precursor	CPPED1
APP2	3.40753612010555e-34	0.317267018522805	0.742	0.714	8.18967231106168e-30	STB Precursor	APP
CEMIP21	3.66998913931899e-34	0.36318810872207	0.535	0.431	8.82045189743926e-30	STB Precursor	CEMIP2
C1GALT11	3.68965143269646e-34	0.394675177197154	0.504	0.412	8.86770825334266e-30	STB Precursor	C1GALT1
COX4I11	7.31461401751322e-34	0.271274298364856	0.845	0.884	1.75799433296913e-29	STB Precursor	COX4I1
STOM1	8.74953765108752e-34	0.388931699774104	0.425	0.314	2.10286387906238e-29	STB Precursor	STOM
UVRAG1	9.80837573134695e-34	0.317776328412552	0.307	0.187	2.35734502327193e-29	STB Precursor	UVRAG
VCP1	1.22491052817703e-33	0.399956806760311	0.622	0.603	2.94394996342068e-29	STB Precursor	VCP
TBCA1	1.61326885918014e-33	0.326057725353788	0.804	0.831	3.87733037615355e-29	STB Precursor	TBCA
ASS11	3.21605632998112e-33	0.27696456106208	0.271	0.149	7.72946978347663e-29	STB Precursor	ASS1
SON	4.06467552955884e-33	0.268676017607358	0.797	0.809	9.76904116774172e-29	STB Precursor	SON
HOOK3	4.95148115480687e-33	0.439317869721457	0.446	0.351	1.19003898074628e-28	STB Precursor	HOOK3
TUT7	1.8741698444344e-32	0.412782960522588	0.417	0.313	4.50437980411365e-28	STB Precursor	TUT7
KPNA6	2.73369926940172e-32	0.429256174804594	0.468	0.381	6.57017282408009e-28	STB Precursor	KPNA6
ITGB51	4.36385182575417e-32	0.314370774050719	0.318	0.19	1.04880814780176e-27	STB Precursor	ITGB5
MYLIP2	4.50574539837328e-32	0.436359799722964	0.6	0.535	1.08291084904503e-27	STB Precursor	MYLIP
SYF21	4.88881302390831e-32	0.334920357151303	0.648	0.616	1.17497732216612e-27	STB Precursor	SYF2
VWA12	6.33232227736322e-32	0.348154501551712	0.62	0.541	1.52191033614148e-27	STB Precursor	VWA1
CREM	7.05823913452532e-32	0.412860556236238	0.343	0.233	1.69637719359182e-27	STB Precursor	CREM
MDM22	9.59410247898712e-32	0.593959874425516	0.503	0.417	2.30584658979977e-27	STB Precursor	MDM2
SLC22A181	2.33991134588523e-31	0.373280701223531	0.255	0.148	5.62374292870056e-27	STB Precursor	SLC22A18
DNMT12	3.38036931561159e-31	0.401944270473436	0.628	0.578	8.12437961314091e-27	STB Precursor	DNMT1
DIRC2	6.69250359834445e-31	0.474804569126072	0.418	0.327	1.60847631482611e-26	STB Precursor	DIRC2
ARRDC31	1.08884351106996e-30	0.432334251088253	0.491	0.391	2.61692649450555e-26	STB Precursor	ARRDC3
NECTIN41	1.18705680471615e-30	0.491514164464346	0.503	0.419	2.85297232445481e-26	STB Precursor	NECTIN4
PAIP2	1.20984895351047e-30	0.398486656386827	0.602	0.568	2.90775097486706e-26	STB Precursor	PAIP2
GLUL1	1.78215853947441e-30	0.416516986956341	0.563	0.487	4.28323983377281e-26	STB Precursor	GLUL
SAP181	7.12094754369687e-30	0.266181248018325	0.756	0.768	1.71144853265211e-25	STB Precursor	SAP18
GHITM1	2.3659054379705e-29	0.365505867807578	0.576	0.52	5.6862171296183e-25	STB Precursor	GHITM
EIF2AK11	2.42607344724717e-29	0.399890906572204	0.56	0.516	5.83082492311385e-25	STB Precursor	EIF2AK1
DUSP51	2.55722179099714e-29	0.465551028964441	0.389	0.28	6.14602685248252e-25	STB Precursor	DUSP5
ESRRA1	3.03516004964782e-29	0.378177851933326	0.474	0.379	7.29470366332357e-25	STB Precursor	ESRRA
NDUFA61	4.45227622458779e-29	0.419928520401496	0.566	0.53	1.07006006781743e-24	STB Precursor	NDUFA6
RAB312	4.47979034485528e-29	0.317597192696429	0.444	0.326	1.07667281148252e-24	STB Precursor	RAB31
SPTSSA1	4.55374990127548e-29	0.474879794850952	0.523	0.465	1.09444825127255e-24	STB Precursor	SPTSSA
RBM421	4.60123578256742e-29	0.356894239493296	0.444	0.345	1.10586100798225e-24	STB Precursor	RBM42
DOCK81	7.19357362243209e-29	0.298601347384628	0.293	0.178	1.72890348441533e-24	STB Precursor	DOCK8
DIAPH21	8.94377028467076e-29	0.439761001733129	0.416	0.324	2.14954575021777e-24	STB Precursor	DIAPH2
NFYB	1.10290178639183e-28	0.523098023178455	0.375	0.283	2.65071415341412e-24	STB Precursor	NFYB
GPR87	3.66207832675053e-28	0.280913058408269	0.292	0.186	8.80143905051221e-24	STB Precursor	GPR87
PRELID11	4.48351426204031e-28	0.417637934473311	0.688	0.706	1.07756781773877e-23	STB Precursor	PRELID1
TALDO11	5.61423621589001e-28	0.35188638537746	0.667	0.647	1.349325532127e-23	STB Precursor	TALDO1
KIAA12171	7.70062909393854e-28	0.30092978010415	0.444	0.336	1.85076919643719e-23	STB Precursor	KIAA1217
SMAGP1	8.1755470326542e-28	0.339502726650642	0.478	0.36	1.96491097382811e-23	STB Precursor	SMAGP
PNPLA2	3.96610638610455e-27	0.306563724800285	0.323	0.217	9.53214008836367e-23	STB Precursor	PNPLA2
GNAI1	5.122646649526e-27	0.357794650673264	0.396	0.3	1.23117689574708e-22	STB Precursor	GNAI1
ELF31	5.39424378976737e-27	0.427476357624343	0.522	0.447	1.29645255243269e-22	STB Precursor	ELF3
BCORL1	1.15329692726834e-26	0.322084768384999	0.282	0.181	2.77183383499674e-22	STB Precursor	BCORL1
BRD41	1.44012028997452e-26	0.314868942097962	0.648	0.641	3.46118510492477e-22	STB Precursor	BRD4
RICTOR	3.29889760992663e-26	0.346649294577833	0.343	0.243	7.92857051569767e-22	STB Precursor	RICTOR
DNAJB41	8.25019667171764e-26	0.360527906143867	0.398	0.3	1.98285226808062e-21	STB Precursor	DNAJB4
COX6C1	9.22260982599771e-26	0.358055454708152	0.762	0.803	2.21656204558029e-21	STB Precursor	COX6C
PSMC41	1.68618550210862e-25	0.387661559296501	0.463	0.392	4.05257823576785e-21	STB Precursor	PSMC4
GSE1	2.35835281761749e-25	0.360327993170348	0.594	0.554	5.66806516186188e-21	STB Precursor	GSE1
PPFIA11	2.64100873519551e-25	0.376859659859749	0.424	0.341	6.34740039416889e-21	STB Precursor	PPFIA1
BAG11	4.84310744697415e-25	0.347942100997215	0.416	0.33	1.16399244380577e-20	STB Precursor	BAG1
COBL	5.20168293913396e-25	0.27099371564908	0.27	0.171	1.25017247759146e-20	STB Precursor	COBL
AZIN1	6.42865266890798e-25	0.353683015556024	0.524	0.466	1.54506238244535e-20	STB Precursor	AZIN1
SERINC5	9.68014105440002e-25	0.322773245124865	0.29	0.195	2.3265251010145e-20	STB Precursor	SERINC5
PSMD111	1.41791343791041e-24	0.32746439568083	0.497	0.43	3.40781315667389e-20	STB Precursor	PSMD11
PITPNA	3.12570645057184e-24	0.312609541584234	0.301	0.206	7.51232288330435e-20	STB Precursor	PITPNA
EDF1	3.59125178559223e-24	0.276317205114901	0.721	0.748	8.63121454149237e-20	STB Precursor	EDF1
DNAJB6	3.77773878113044e-24	0.278907281136963	0.686	0.67	9.07941738656891e-20	STB Precursor	DNAJB6
NUMA1	4.56571278948105e-24	0.303761238522055	0.27	0.175	1.09732341182388e-19	STB Precursor	NUMA1
CDKN1C	6.01084737777482e-24	0.288353577798223	0.907	0.86	1.4446470587744e-19	STB Precursor	CDKN1C
CD242	7.35677787461093e-24	0.332232283864992	0.584	0.474	1.76812799438399e-19	STB Precursor	CD24
SH3GLB21	9.81959025165635e-24	0.328922743489558	0.476	0.397	2.36004032108309e-19	STB Precursor	SH3GLB2
ERC1	1.59522911906629e-23	0.362712636005106	0.405	0.328	3.83397366476393e-19	STB Precursor	ERC1
RRAGC	1.7759231726113e-23	0.364204980586996	0.449	0.38	4.268253753054e-19	STB Precursor	RRAGC
KRAS1	4.73740381879443e-23	0.313316287917377	0.467	0.376	1.13858763380905e-18	STB Precursor	KRAS
GNG12	5.01332119513976e-23	0.454758322812987	0.504	0.477	1.20490161603989e-18	STB Precursor	GNG12
TDRP1	8.15660162858267e-23	0.298322746860128	0.457	0.377	1.96035763541356e-18	STB Precursor	TDRP
NRBF2	1.11691459204746e-22	0.429988669159305	0.423	0.363	2.68439253052687e-18	STB Precursor	NRBF2
CMYA51	1.63441058081613e-22	0.290793343619568	0.265	0.169	3.92814238993348e-18	STB Precursor	CMYA5
ADRM11	1.6995050038172e-22	0.381164053955907	0.46	0.403	4.08459032617425e-18	STB Precursor	ADRM1
CEP152	5.24602004207851e-22	0.349677202625287	0.258	0.169	1.26082845691315e-17	STB Precursor	CEP152
LATS21	7.97845805367526e-22	0.345422094240007	0.383	0.295	1.91754260862031e-17	STB Precursor	LATS2
EML42	8.1807642781262e-22	0.351484413525265	0.493	0.429	1.96616488660485e-17	STB Precursor	EML4
VPS26A	9.56294953434778e-22	0.301558204697383	0.475	0.414	2.29835929108514e-17	STB Precursor	VPS26A
KMT2C	1.14073560073474e-21	0.357989794184739	0.608	0.596	2.74164394280587e-17	STB Precursor	KMT2C
PSMA11	1.25764692264353e-21	0.322901233775375	0.604	0.589	3.02262861388145e-17	STB Precursor	PSMA1
CDC42EP4	3.12952887302119e-21	0.259927701074466	0.252	0.163	7.52150969341913e-17	STB Precursor	CDC42EP4
GNAS1	3.80336323694236e-21	0.323169635023053	0.872	0.945	9.14100320366727e-17	STB Precursor	GNAS
USP532	4.25573791463992e-21	0.344709205932608	0.57	0.527	1.02282405040456e-16	STB Precursor	USP53
SLC6A41	5.76946830228555e-21	0.28630008484229	0.311	0.212	1.38663401177131e-16	STB Precursor	SLC6A4
PSMB61	6.63762607844221e-21	0.272214389247185	0.67	0.681	1.5952870516928e-16	STB Precursor	PSMB6
EPB41L31	9.28679723153385e-21	0.347675872674116	0.336	0.253	2.23198884662685e-16	STB Precursor	EPB41L3
SNX27	1.10142929655534e-20	0.349316910162946	0.38	0.305	2.6471751713411e-16	STB Precursor	SNX27
DDX3X	1.32931712026287e-20	0.284617240686164	0.734	0.763	3.19488076683978e-16	STB Precursor	DDX3X
FBN21	1.46099295956961e-20	0.287839145386079	0.639	0.591	3.51135047902959e-16	STB Precursor	FBN2
CACUL1	1.73876538935828e-20	0.294964072090887	0.357	0.271	4.17894873678369e-16	STB Precursor	CACUL1
RASSF61	3.13156106112836e-20	0.369625570853644	0.354	0.271	7.5263938543159e-16	STB Precursor	RASSF6
SIK3	4.38586030229581e-20	0.284138703750676	0.284	0.201	1.05409766505378e-15	STB Precursor	SIK3
SEMA7A	5.20367030431105e-20	0.326770019100587	0.327	0.244	1.25065012093812e-15	STB Precursor	SEMA7A
GRB7	6.53124514738974e-20	0.270904676581897	0.261	0.175	1.56971945872365e-15	STB Precursor	GRB7
HBP1	6.54761071143326e-20	0.342109086159679	0.391	0.318	1.57365275838587e-15	STB Precursor	HBP1
ATP6V0A1	8.92174780171437e-20	0.30882699359401	0.29	0.207	2.14425286666403e-15	STB Precursor	ATP6V0A1
NFKBIA3	1.36709334629486e-19	0.408646809234466	0.764	0.723	3.28567214848507e-15	STB Precursor	NFKBIA
ITGB43	1.41319623198563e-19	0.25621807152406	0.556	0.476	3.39647582395427e-15	STB Precursor	ITGB4
CD461	1.80972874106924e-19	0.27702388665601	0.742	0.778	4.34950205628582e-15	STB Precursor	CD46
IRF6	2.08236722752816e-19	0.281436944619817	0.342	0.255	5.00476139464117e-15	STB Precursor	IRF6
UBE2H1	3.83321409023744e-19	0.266367127803378	0.65	0.655	9.21274674447667e-15	STB Precursor	UBE2H
ATP6V0D1	7.29991435826021e-19	0.353970170511033	0.399	0.341	1.75446141686426e-14	STB Precursor	ATP6V0D1
UBR5	1.68036191600283e-18	0.332509167361631	0.366	0.296	4.03858182892119e-14	STB Precursor	UBR5
RBMS1	1.9778211273744e-18	0.372355142566919	0.541	0.525	4.75349529753163e-14	STB Precursor	RBMS1
LGMN1	2.92067716466406e-18	0.357882268638388	0.508	0.455	7.01955549755359e-14	STB Precursor	LGMN
MAFG	3.03720086838064e-18	0.296902544543333	0.293	0.21	7.29960856706604e-14	STB Precursor	MAFG
DSP3	3.71743032057899e-18	0.258589557011361	0.88	0.91	8.93447203247955e-14	STB Precursor	DSP
ARHGAP182	3.84244113732748e-18	0.307038808859286	0.406	0.322	9.23492302945286e-14	STB Precursor	ARHGAP18
ATP6V1D	4.76244556750697e-18	0.298287929205663	0.433	0.376	1.14460616769463e-13	STB Precursor	ATP6V1D
RYBP1	4.85034952172908e-18	0.363385778207623	0.424	0.373	1.16573300405237e-13	STB Precursor	RYBP
ATP6V0B	4.85476111456725e-18	0.339829043771004	0.577	0.576	1.16679328627509e-13	STB Precursor	ATP6V0B
LIMK22	5.803334407676e-18	0.283895663149914	0.448	0.381	1.39477339154085e-13	STB Precursor	LIMK2
CCND31	5.87844315653669e-18	0.312570936226069	0.273	0.193	1.41282502824203e-13	STB Precursor	CCND3
TENM32	8.08176170776908e-18	0.299240402856653	0.461	0.393	1.94237060884522e-13	STB Precursor	TENM3
NR4A11	1.05439881805359e-17	0.355840516700367	0.354	0.265	2.53414211931e-13	STB Precursor	NR4A1
FHDC1	1.06037458716442e-17	0.311090372062248	0.26	0.184	2.54850428279097e-13	STB Precursor	FHDC1
SLC20A11	1.1470800251221e-17	0.314955266317678	0.367	0.285	2.75689213237845e-13	STB Precursor	SLC20A1
DHX36	1.34274769560371e-17	0.309618041304546	0.494	0.453	3.22715981161395e-13	STB Precursor	DHX36
NABP12	1.35937830625474e-17	0.348304259477023	0.487	0.429	3.26712982125265e-13	STB Precursor	NABP1
MBD3	1.73673621401078e-17	0.321611752486635	0.499	0.466	4.1740718167535e-13	STB Precursor	MBD3
FAM129B	2.56204863502917e-17	0.34950083640481	0.553	0.535	6.1576276894291e-13	STB Precursor	FAM129B
CREBRF	2.99949418661163e-17	0.372763894388913	0.384	0.321	7.20898432810238e-13	STB Precursor	CREBRF
TRIM33	3.6852395903057e-17	0.312332999029518	0.452	0.404	8.85710483134071e-13	STB Precursor	TRIM33
RPIA1	4.76672488448554e-17	0.304522712015472	0.332	0.254	1.14563465873726e-12	STB Precursor	RPIA
TLDC1	5.49693304592592e-17	0.256935677271457	0.27	0.191	1.32113288825784e-12	STB Precursor	TLDC1
PSMD61	5.78682473035221e-17	0.304210713305834	0.43	0.37	1.39080545569285e-12	STB Precursor	PSMD6
CLCN3	6.3870977876497e-17	0.260234833183919	0.263	0.188	1.53507508228373e-12	STB Precursor	CLCN3
MVP1	9.98764283977743e-17	0.308651250463907	0.443	0.394	2.40043008011211e-12	STB Precursor	MVP
CTNNB13	1.2334864868445e-16	0.256174632622711	0.681	0.683	2.96456142248207e-12	STB Precursor	CTNNB1
H2AFJ	1.57567825188026e-16	0.308602610872267	0.419	0.364	3.78698511056903e-12	STB Precursor	H2AFJ
PSMC51	1.58936717354606e-16	0.275259842542574	0.532	0.509	3.8198850649006e-12	STB Precursor	PSMC5
PBX11	1.81122575931745e-16	0.276125456011124	0.298	0.217	4.35309998994356e-12	STB Precursor	PBX1
ATP1B31	5.46148312246275e-16	0.305843796236086	0.418	0.355	1.3126128536527e-11	STB Precursor	ATP1B3
TEAD3	6.84523924581612e-16	0.280779878615294	0.38	0.316	1.64518480033945e-11	STB Precursor	TEAD3
CMAS	8.09217363579181e-16	0.384281517519804	0.475	0.447	1.9448730116262e-11	STB Precursor	CMAS
CASP42	9.65774897165342e-16	0.299448517528733	0.496	0.438	2.32114338784718e-11	STB Precursor	CASP4
HNRNPH2	9.7725711897815e-16	0.283963679839136	0.375	0.314	2.34873975975209e-11	STB Precursor	HNRNPH2
ZNF703	1.29713380363731e-15	0.424259621625061	0.356	0.297	3.11753138366191e-11	STB Precursor	ZNF703
LGALS8	1.49998007016464e-15	0.250286626527886	0.36	0.29	3.60505210063369e-11	STB Precursor	LGALS8
EIF3J1	1.85009339189069e-15	0.268195326369391	0.701	0.741	4.44651445807009e-11	STB Precursor	EIF3J
NMT11	1.94991890409426e-15	0.308800512346459	0.71	0.733	4.68643509410015e-11	STB Precursor	NMT1
CTSD	2.35091476709849e-15	0.280824293235428	0.661	0.686	5.65018855124451e-11	STB Precursor	CTSD
[truncated: 3,460 more rows]
