# Supplementary material for: Regionally distinct trophoblast regulate barrier function and invasion in the human placenta
Source: eLife. 2022 Jul 7;11:e78829. doi: 10.7554/eLife.78829 (PMC9323019; doi:10.7554/eLife.78829)
Supplement: Figure 5—source data 1. [file elife-78829-fig5-data1.csv]

	p_val	avg_logFC	pct.1	pct.2	p_val_adj
CSH1	1.67579244434652e-186	2.79119889035794	0.667	0.061	4.02759956074243e-182
COL4A2	8.34912557259945e-149	0.902925204102193	0.971	0.859	2.00662884011855e-144
TFPI2	6.93034814593442e-134	1.20806339436277	0.528	0.049	1.66563987339388e-129
TNFSF10	1.46369225614086e-129	-1.15171853042116	0.794	0.981	3.51783796840893e-125
HTRA4	4.3245241496379e-121	1.27113901650396	0.838	0.383	1.03935613412397e-116
CD24	1.63105576942007e-119	1.06785586717455	0.558	0.092	3.92007943622419e-115
CLIC3	7.06475724491561e-113	-1.05475601570362	0.794	0.956	1.69794375624302e-108
COL21A1	1.01952978096971e-108	0.817066509842491	0.526	0.089	2.4503378755826e-104
CPM	1.87012826392396e-106	0.945035940881773	0.67	0.209	4.49466626951486e-102
MMP2	6.60430026312445e-103	1.48566231125154	0.487	0.076	1.58727752523933e-98
COL4A1	1.17169332629305e-101	0.785628527237716	0.971	0.895	2.81604774041273e-97
ITM2C	4.24789646517407e-84	0.588879126863148	0.401	0.051	1.02093943643993e-79
FABP7	7.96968345447835e-84	-1.29655488489347	0.541	0.83	1.91543372144933e-79
IFITM3	8.70050164758204e-84	-0.63394579868908	0.794	0.975	2.09107856597987e-79
LAMA4	2.55105975183855e-82	0.694417812924026	0.501	0.111	6.13121700756878e-78
ACAN	6.55056837770843e-82	0.697675647598637	0.44	0.077	1.57436360389844e-77
CDKN1C	7.69664864696018e-79	-0.665013784525259	0.997	0.999	1.84981253581041e-74
COTL1	1.23953985109802e-77	0.602059188117553	0.939	0.834	2.97911007812899e-73
PDIA3	1.59236848317702e-77	0.60054597740935	0.927	0.81	3.82709841246766e-73
COL5A1	3.23289673177465e-77	-0.889274209873233	0.118	0.53	7.7699440051472e-73
MFAP5	2.56772729169778e-76	0.64769036441076	0.955	0.873	6.17127577286644e-72
SERF2	7.47892847567436e-74	0.476944334704333	0.977	0.948	1.79748566984357e-69
CYP11A1	5.47835332882303e-73	-0.742701878597759	0.643	0.887	1.31666743904933e-68
EGLN3	1.53625336052699e-72	-0.856336759949755	0.425	0.783	3.69223132669056e-68
BACE2	3.08962027856413e-72	0.502136493007395	0.431	0.084	7.42559337750103e-68
TP53I11	5.49310411466308e-72	0.412163065701671	0.265	0.01	1.32021264291813e-67
HAPLN3	3.54643777764479e-71	0.757356248199823	0.689	0.291	8.52350855479148e-67
RALBP1	8.83874587441631e-71	0.813128442857209	0.763	0.401	2.12430418345722e-66
SOD3	1.9521467033323e-68	-0.791240642171045	0.115	0.521	4.69178938678885e-64
FYB1	3.65315031125711e-68	0.669563494257928	0.608	0.244	8.77998145807535e-64
MFAP2	7.44351009173982e-68	0.722039178708505	0.708	0.33	1.78897321544875e-63
TNNT3	1.02180357468178e-67	-0.854362854719474	0.072	0.448	2.4558027113902e-63
PAPPA	1.48328997660699e-66	1.62497657552193	0.466	0.128	3.56493912977723e-62
HLA-B	6.9445914869491e-65	0.680596776667518	0.417	0.094	1.66906311797335e-60
LAIR2	1.70654070839738e-64	1.31485205985161	0.769	0.533	4.10149993856226e-60
MTRNR2L8	2.68126128503109e-64	-0.907125313661078	0.541	0.792	6.44414337244373e-60
IGFBP3	4.18412406830683e-64	0.967104827575298	0.917	0.871	1.00561237857686e-59
IL10RA	7.60649802614711e-64	0.473715125177475	0.325	0.045	1.8281457356042e-59
C4orf48	1.65454686034584e-63	0.39386231898438	0.297	0.033	3.97653792415518e-59
SERPINF1	2.12681616121277e-63	0.380532086013888	0.27	0.021	5.11158996185877e-59
APOE	7.47284152341734e-63	0.448675275073593	0.345	0.056	1.79602273173812e-58
IGF2.1	1.04206959678624e-62	-0.545988074967365	0.855	0.959	2.50451006891604e-58
KRT14	2.37738027543315e-62	-0.779509721686639	0.417	0.784	5.71379575397604e-58
QSOX1	1.17533838187007e-60	0.522153485912372	0.972	0.928	2.82480826698652e-56
SRI	1.67021007933692e-60	0.765758083996521	0.874	0.758	4.01418290467835e-56
CCNB1	9.83089258370512e-60	0.562657901325935	0.3	0.041	2.36275672356769e-55
RPL27A	1.42496880987898e-59	0.460744281743362	0.949	0.923	3.42477003766314e-55
RPS4Y1	1.62294222089287e-59	0.610739350458833	0.696	0.311	3.90057933369391e-55
SAT1	1.72097332962662e-59	-0.512547278036969	0.99	1	4.13618730042462e-55
TCIM	3.45118394885588e-59	-0.898167143485487	0.208	0.568	8.29457550268022e-55
PTGDS	7.32937364709716e-58	-1.45886885192668	0.114	0.447	1.76154166234333e-53
ANGPTL4	9.31155769689398e-57	0.462567055322051	0.323	0.051	2.2379397768715e-52
PTPRE	1.12574605242789e-56	0.501758268815089	0.424	0.115	2.70561806240519e-52
CST3	1.92987643884479e-56	0.553691751421716	0.711	0.361	4.63826503311956e-52
B2M	1.69314182934224e-55	0.663801109334394	0.99	0.975	4.06929707264115e-51
CTSL	1.91447875682647e-55	0.675107015743792	0.982	0.895	4.60125824415675e-51
CCDC88A	6.94140981251609e-55	0.287477502681517	0.244	0.021	1.66829843434012e-50
FBLN1	1.17610709048642e-54	0.797358146180564	0.956	0.78	2.82665578127507e-50
TMSB10	1.90234340785324e-54	0.380568394481615	0.993	0.998	4.57209214643448e-50
SERPINE1	8.1102303010554e-54	-0.864567491847606	0.503	0.798	1.94921275055566e-49
MTRNR2L12	1.06462432371247e-53	-0.737079986633892	0.709	0.848	2.55871809961054e-49
ITM2B	1.39768758259803e-53	0.76297389061643	0.999	0.99	3.35920233601611e-49
FASN	3.19458785661756e-52	-0.774609882556215	0.383	0.66	7.67787245459464e-48
FN1	1.7990021595981e-51	-0.390769518156889	1	1	4.32372179037806e-47
TCEAL4	1.81240054161764e-50	-0.580574692180565	0.887	0.939	4.35592346172383e-46
CSRP2	2.21821890788384e-50	-0.740008219003124	0.437	0.699	5.33126732320801e-46
XIST	2.25974278365543e-50	-0.762261710984425	0.115	0.453	5.43106580623745e-46
C12orf75	2.57508475708311e-50	-0.514025290420376	0.917	0.976	6.18895870517355e-46
HMGB3	3.30337110082821e-50	-0.482253034433247	0.949	0.979	7.93932210373053e-46
PRCP	5.282783587416e-50	0.553744569439674	0.686	0.343	1.26966420739956e-45
DUSP4	8.2091319332771e-50	0.286656704398133	0.219	0.018	1.97298276884382e-45
GPX3	1.43891480279227e-49	0.693246108001665	0.811	0.614	3.45828783703095e-45
ERVH48-1	1.91111066980364e-49	0.525977613655471	0.414	0.128	4.59316338380606e-45
P4HB	1.94402389735558e-49	0.411241508337243	0.966	0.919	4.67226703490441e-45
FLT4	9.70842684335915e-49	0.37607793972841	0.269	0.042	2.33332330753294e-44
GGH	1.21286121573764e-48	0.283496164083957	0.232	0.025	2.91499064590385e-44
PAEP	6.30524501794609e-47	-0.466120075967929	0.013	0.28	1.51540258761316e-42
KRT8	1.8085703877701e-46	-0.286414572722942	0.999	1	4.34671806996666e-42
CAPN6	4.41415330001974e-46	0.579953942566459	0.548	0.244	1.06089760412675e-41
CD74	8.62084125768581e-46	0.366260492257981	0.295	0.059	2.07193298787221e-41
GDF15	1.88122323803766e-45	0.837667028021555	0.567	0.255	4.52133193029972e-41
LAIR1	4.24704897662383e-45	0.301305015822724	0.227	0.028	1.02073575104177e-40
MMP11	5.07710058801546e-45	0.498786516495841	0.42	0.131	1.22023035532364e-40
MT-ND1	5.65581525371388e-45	0.329116075931265	0.994	0.997	1.35931863807759e-40
RPL28	7.35012216351971e-45	0.321469609858264	0.985	0.981	1.76652836078033e-40
PLA2G10	1.03895755888982e-44	0.301261170853067	0.301	0.063	2.4970305970358e-40
RPS11	2.00769231208094e-44	0.358266714520614	0.966	0.957	4.82528770285533e-40
SERPINE2	2.50351389228448e-44	1.13090340090748	0.854	0.549	6.01694528871651e-40
ITGB1	3.72355197852872e-44	0.372071479800181	0.988	0.96	8.94918482519593e-40
BST2	3.96662306386323e-44	0.617004898958336	0.592	0.272	9.53338187168889e-40
RASA1	5.54354136210172e-44	-0.521315205095015	0.651	0.776	1.33233473096753e-39
CRTAP	9.33697079219635e-44	0.34218634007433	0.401	0.125	2.24404756019647e-39
RPL18A	4.33055545860334e-43	0.378520816019761	0.988	0.992	1.04080569892073e-38
ST13	5.62572955562887e-43	-0.467960141377735	0.86	0.949	1.35208784139984e-38
LAMA3	1.22331842781082e-42	-0.653831752305779	0.054	0.325	2.94012350940054e-38
SSR4	3.35040362051599e-42	0.441027717792241	0.923	0.781	8.05236006154813e-38
GADD45B	4.31935732230979e-42	-0.697011052623782	0.253	0.535	1.03811433884393e-37
LMAN1	1.39806019544273e-41	0.469442638192674	0.795	0.575	3.36009787372707e-37
SOX4	1.95309422245842e-41	0.460309410962976	0.918	0.803	4.69406665425656e-37
COL27A1	2.08006120327324e-41	0.518559701214941	0.525	0.228	4.99921909594691e-37
PLOD1	4.93719663463245e-41	0.474315373061817	0.57	0.278	1.18660583916756e-36
MT1H	6.73252109033365e-41	0.330825585781284	0.268	0.051	1.61809411885079e-36
PDIA5	1.86389900901358e-40	0.494165880214987	0.697	0.423	4.47969487826324e-36
HLA-DRA	2.97803995648594e-40	0.363990640306045	0.272	0.06	7.1574212314183e-36
GRK3	3.84799211479476e-40	0.351866490789024	0.325	0.087	9.24826424869773e-36
ANXA5	6.47788680229808e-40	0.382842061327472	0.937	0.871	1.55689531406432e-35
ARRDC3	1.45989244373149e-39	-0.620059914331995	0.319	0.576	3.50870549926427e-35
PLIN2	2.07695116304509e-39	0.529897563682821	0.857	0.655	4.99174442526256e-35
RRBP1	5.67435469313142e-39	0.36917811188529	0.918	0.834	1.36377440694721e-34
CCNYL1	3.19917272423186e-38	0.261558108398028	0.295	0.072	7.68889172541884e-34
RPL35	3.6288327815186e-38	0.352545437606505	0.961	0.946	8.72153670710181e-34
COL17A1	4.61097043277461e-38	-0.395312970260805	0.782	0.925	1.10820063381305e-33
HTRA1	5.00535526713864e-38	0.561851990561523	0.899	0.747	1.2029870849041e-33
CITED2	5.18188976697507e-38	-0.52303227322618	0.775	0.885	1.24541538659479e-33
CTSV	8.22043195476027e-38	0.324803124089118	0.338	0.1	1.97569861600708e-33
HIP1	1.20997532446983e-37	0.271100670884909	0.246	0.049	2.90805469483079e-33
ADAM12	1.44828260717128e-37	0.557077519159352	0.943	0.822	3.48080241807545e-33
P3H1	2.19249912890515e-37	0.375196650168001	0.551	0.252	5.26945240641064e-33
MT-CO2	2.89722889874987e-37	0.268379503493933	0.996	0.999	6.96319993525545e-33
CTSB	4.34962678435556e-37	0.434181975274868	0.77	0.538	1.04538930135201e-32
MALAT1	5.9566149259904e-37	-0.253328273916826	0.999	0.999	1.43161283131253e-32
MGAT4A	6.96493686969392e-37	0.34264840332708	0.398	0.137	1.67395292726224e-32
ISG15	1.12859899227892e-36	-0.441144749955678	0.775	0.914	2.71247481804315e-32
CRISPLD2	1.53069877987013e-36	-0.506180877660284	0.117	0.385	3.67888144753987e-32
SLC17A8	2.03858859098801e-36	0.256754308724045	0.162	0.014	4.89954381958059e-32
MORF4L2	3.71793145864428e-36	-0.299377891760566	0.955	0.979	8.93567646770567e-32
DNAJC1	5.15213403512475e-36	0.394703449073728	0.532	0.251	1.23826389400188e-31
RPLP2	8.02455901080698e-36	0.29712778947219	0.985	0.972	1.92862251265735e-31
HUNK	1.33862992683652e-35	0.292430058395398	0.254	0.056	3.21726316615888e-31
JUND	2.35751760644742e-35	-0.477692887520501	0.942	0.975	5.66605781533574e-31
CD63	2.42721166065286e-35	0.306568588674156	0.993	0.988	5.83356050521308e-31
RPS26	3.83871933034319e-35	0.491626831111019	0.849	0.748	9.22597803854682e-31
YBX1	3.98820401235834e-35	0.376885841334586	0.892	0.804	9.58524952330204e-31
EIF4A2	4.1935057174519e-35	-0.495727602393213	0.573	0.71	1.00786716413239e-30
SLC29A1	4.56721920705793e-35	0.316937133557055	0.292	0.079	1.0976854642243e-30
CALU	5.43094684345612e-35	0.354111454922951	0.917	0.809	1.30527376435624e-30
ENG	6.07600329551346e-35	0.512330710345753	0.889	0.713	1.4603066320437e-30
RPS28	7.83910710532679e-35	0.291828427048612	0.991	0.996	1.88405100169424e-30
RPS19	8.41266808698027e-35	0.364178312133218	0.98	0.986	2.02190064802484e-30
LVRN	1.01443842023961e-34	0.603278772752337	0.592	0.317	2.43810129920389e-30
RXRA	2.3138254224281e-34	-0.49498450422409	0.354	0.581	5.56104802026369e-30
DDX3Y	4.94325962279067e-34	0.350453536801035	0.402	0.166	1.18806301774151e-29
RPN2	7.23291854184491e-34	0.338191703428728	0.953	0.873	1.73835964234701e-29
RFK	8.07970190982736e-34	-0.459990817803308	0.594	0.748	1.94187555700791e-29
PABPC1	1.65150575017156e-33	-0.29619174584565	0.917	0.961	3.96922891996232e-29
PDLIM2	4.60453667966497e-33	-0.47595673185444	0.3	0.548	1.10665434559068e-28
MAN1A2	6.7112120663739e-33	0.447854993114117	0.794	0.6	1.6129727080323e-28
CALR	7.51078261241631e-33	0.346461407297391	0.952	0.916	1.80514149306814e-28
PTMA	7.87045700434219e-33	-0.25877065593933	0.994	0.998	1.8915856364236e-28
PRDX1	8.3286229004795e-33	0.352668765171672	0.905	0.838	2.00170122790124e-28
HLA-C	8.71240193785969e-33	0.580160128784323	0.82	0.588	2.0939386817452e-28
MT1G	1.21755425941697e-32	0.359302890363654	0.221	0.045	2.92626990708274e-28
TFPI	1.40591871002631e-32	0.503779236645276	0.906	0.844	3.37898502767723e-28
MICAL3	2.42043776683667e-32	0.381483257006654	0.563	0.288	5.81728012881525e-28
CKAP4	4.83834089735366e-32	0.456337209556789	0.506	0.252	1.16284685126998e-27
PPIB	5.16029552159049e-32	0.376170066575609	0.947	0.893	1.24022542565906e-27
PRDX4	6.64281783179298e-32	0.477108493379506	0.804	0.606	1.59653483769313e-27
FGFR1	1.09921122524298e-31	0.447268183672243	0.594	0.314	2.64184425874898e-27
MT-CYB	2.02952260563483e-31	0.285123489176139	0.996	0.998	4.87775463038274e-27
ASCL2	3.19491250293579e-31	-0.353023550182191	0.955	0.979	7.67865270955589e-27
UPK1B	4.05189439248273e-31	-0.733003238785337	0.171	0.407	9.73832298289299e-27
ALDH2	5.3529589511934e-31	0.255839437038312	0.326	0.107	1.28653015432982e-26
ASPSCR1	1.20198148402404e-30	0.408281685314324	0.785	0.549	2.88884229870338e-26
TMED3	1.27739497334083e-30	0.41994468796001	0.69	0.426	3.07009107892735e-26
CAMK2N1	3.85196391604574e-30	-0.616513280563308	0.137	0.367	9.25781007582434e-26
DYNLL1	4.77589197840078e-30	-0.414370890245461	0.775	0.846	1.14783787808884e-25
HPCAL1	5.3638660042866e-30	-0.462457345634	0.262	0.493	1.28915155547024e-25
PTPRA	6.18917505496223e-30	-0.478399902941929	0.535	0.697	1.48750633270962e-25
PTN	6.88357663964779e-30	0.42157503260421	0.789	0.584	1.65439880957295e-25
UGP2	8.72639064787787e-30	-0.355444329052207	0.904	0.967	2.09730072831097e-25
CALM3	9.2898491515179e-30	0.356633214508757	0.585	0.327	2.23272234507581e-25
LGALS1	1.15678315851348e-29	0.690205050559875	0.38	0.158	2.78021264317131e-25
VLDLR	2.2126497314591e-29	0.250493407624867	0.282	0.088	5.31788236458881e-25
SH3BP5	3.94087669325438e-29	-0.370898884624514	0.89	0.927	9.47150304456759e-25
KDELR3	4.09683848151698e-29	0.296139787373215	0.415	0.177	9.84634160647792e-25
IFI6	4.40892300788563e-29	-0.354835741200507	0.882	0.967	1.05964055571523e-24
TNKS2	5.59447648134957e-29	-0.432021715581129	0.64	0.738	1.34457647752755e-24
PLCG2	5.84229563975475e-29	-0.495672745255776	0.542	0.725	1.40413733405866e-24
EGFR	7.7675540663655e-29	-0.510415959916215	0.481	0.661	1.86685394431028e-24
AC211486.5	8.2885166329002e-29	0.333924810768791	0.314	0.109	1.99206208755123e-24
TXN	9.53800570800317e-29	-0.355841876456698	0.836	0.877	2.29236429186148e-24
ATF7IP2	3.34068563728466e-28	0.324341701682973	0.346	0.139	8.02900386064995e-24
COL3A1	3.44950859321507e-28	-0.328442292294275	0.015	0.189	8.29054895293309e-24
SEMA5A	4.62327127258583e-28	-0.363974733856857	0.048	0.248	1.11115701765328e-23
CD40	7.60621151385842e-28	-0.42336037252907	0.076	0.28	1.82807687524073e-23
CGA	1.31870705575163e-27	0.91484642236776	0.323	0.113	3.16938053779348e-23
H3F3B	1.35361626370888e-27	-0.32160660491647	0.934	0.943	3.25328132819791e-23
TYMP	1.47400497363884e-27	0.391414599109156	0.716	0.484	3.54262355364358e-23
DNAJC10	1.52889301162089e-27	0.255774770978528	0.418	0.178	3.67454146412966e-23
RPS29	3.63419689926249e-27	-0.312423462937957	0.987	0.997	8.73442882768747e-23
BAIAP2L1	5.72025368342763e-27	0.347624178942902	0.379	0.166	1.374805770275e-22
UBA52	6.00833915171599e-27	0.265745939018835	0.956	0.924	1.44404423172342e-22
SOD1	6.02519142801951e-27	0.479381391802686	0.751	0.534	1.44809450781021e-22
ISM2	6.20088590829128e-27	0.436817537251665	0.971	0.918	1.49032091919873e-22
MAGED1	7.10285762586503e-27	0.344078690833973	0.684	0.426	1.7071008018004e-22
LIFR	8.0185415517996e-27	0.263888310109159	0.241	0.07	1.92717627655952e-22
CDK7	1.76905979896194e-26	0.373005571036794	0.548	0.318	4.25175832082512e-22
RPS18	1.85610858310673e-26	0.332738748254071	0.99	0.998	4.46097136863872e-22
FAT2	1.91142737801434e-26	0.29990509670687	0.401	0.178	4.59392456031966e-22
DYNLL2	2.4454800070341e-26	0.291736764585681	0.496	0.249	5.87746664890575e-22
CCDC80	2.52061619067076e-26	0.3465091638021	0.678	0.431	6.0580489526581e-22
BEX3	2.53711711085181e-26	-0.425905534563216	0.538	0.711	6.09770726422125e-22
CBLB	3.29137043441801e-26	0.401904779908606	0.614	0.378	7.91047970208024e-22
ZFP36	3.96805934425767e-26	-0.558726806481603	0.351	0.534	9.53683382798889e-22
HMGN3	4.20115393444083e-26	-0.334996814656307	0.883	0.936	1.00970533660351e-21
TUBB4B	4.97901356712802e-26	-0.401118891680094	0.639	0.729	1.19665612072355e-21
ITGB4	6.55021216926703e-26	-0.372742216464896	0.044	0.226	1.57427799276164e-21
CDA	1.13346268203119e-25	-0.378474178816904	0.022	0.191	2.72416420999375e-21
PLTP	1.24150944872489e-25	0.305099069944877	0.268	0.087	2.98384380906541e-21
CRIP1	1.46900631517873e-25	-0.332277118153484	0.025	0.192	3.53060977790056e-21
RPS6	1.70324796285606e-25	0.265174656696797	0.982	0.991	4.09358615392825e-21
SLC1A6	1.92983257503971e-25	-0.363440821517116	0.053	0.236	4.63815961085043e-21
PSG5	3.41969821261718e-25	-0.428742851145044	0.067	0.263	8.21890268420412e-21
FDX1	4.20639056856531e-25	0.336090164201602	0.475	0.241	1.01096390924899e-20
GJA5	8.30652022483616e-25	0.395534901647298	0.794	0.6	1.99638907083712e-20
CARHSP1	8.38287255912328e-25	-0.472206711533784	0.399	0.557	2.01473959085969e-20
PFN1	9.44980359737826e-25	0.270117674085395	0.955	0.93	2.27116579659389e-20
RPL13	9.59602072495016e-25	0.299086963913515	0.994	0.994	2.30630762103452e-20
NUPR1	1.04423190521166e-24	-0.476759878631089	0.155	0.358	2.5097069609857e-20
GPAA1	1.29098258108759e-24	0.265701591109451	0.417	0.199	3.10274753538592e-20
CALD1	1.83385110895135e-24	0.258275331690148	0.943	0.929	4.40747775525369e-20
FOS	2.14659769740742e-24	-0.261868875940001	0.996	1	5.159132905949e-20
DNAJB4	2.42121784531428e-24	0.261778898228774	0.349	0.143	5.81915496942835e-20
MBNL3	2.84865245549502e-24	0.343789320855656	0.307	0.119	6.84645131153672e-20
SNAP23	4.11549645790761e-24	-0.423151990607221	0.544	0.674	9.89118418693515e-20
LY6K	5.22926035098862e-24	0.351630283602337	0.595	0.363	1.2568004327566e-19
MT1X	5.24366843200496e-24	0.343415252192458	0.656	0.438	1.26026327094807e-19
ADGRG6	6.0242302458369e-24	0.272056192124208	0.231	0.072	1.44786349728444e-19
AHNAK	8.73799833215828e-24	-0.327688873378831	0.832	0.893	2.10009051915092e-19
MAGED2	9.34003005141045e-24	0.295754490000624	0.596	0.361	2.24478282255599e-19
IER5L	1.15664253111296e-23	-0.380420039841816	0.145	0.35	2.77987465927688e-19
JUNB	1.16818415797188e-23	-0.443185915453019	0.716	0.774	2.80761380526961e-19
CTSZ	1.49586049136032e-23	0.320984138920889	0.592	0.354	3.59515110493538e-19
MYH10	1.51863321383474e-23	0.397154060383169	0.629	0.408	3.64988306613042e-19
ANXA1	1.56908040881842e-23	-0.257482880915868	0.936	0.979	3.7711278545542e-19
GRB2	1.60679997249974e-23	0.376664099077478	0.768	0.605	3.86178305390588e-19
TUBB	1.98835294577166e-23	0.374872813456524	0.806	0.68	4.77880746986761e-19
SLC49A3	2.76119985473524e-23	-0.303533116119604	0.053	0.226	6.63626773087068e-19
CST6	3.87165731862025e-23	-0.473910680710852	0.304	0.512	9.30514119957191e-19
RNF145	4.90463731771865e-23	-0.414922666795201	0.136	0.325	1.1787805329405e-18
INTS6	5.23213961051819e-23	-0.51586896006562	0.482	0.605	1.25749243399194e-18
RPL39	5.40596377204618e-23	0.273914292920942	0.988	0.994	1.29926933297358e-18
TENM3	5.92295093261657e-23	0.257429115309344	0.295	0.119	1.42352202714507e-18
MEX3D	6.98313635829771e-23	-0.428927611383825	0.278	0.48	1.67832699235327e-18
FBXO32	7.7568734775182e-23	-0.528137707052086	0.241	0.437	1.86428697158672e-18
MXRA7	9.96251569510203e-23	-0.311954186594411	0.572	0.734	2.39439102216082e-18
GCN1	1.0064193064786e-22	0.289325030372502	0.496	0.268	2.41882816119066e-18
RARRES3	1.78316727185016e-22	-0.410308025821369	0.083	0.264	4.28566422116468e-18
EVA1B	1.80737107972819e-22	0.389336258220223	0.684	0.475	4.34383565301873e-18
DSC3	1.86500883911243e-22	-0.313273283307551	0.042	0.205	4.48236224392283e-18
CLDN4	2.7506940122086e-22	-0.311330069424962	0.75	0.852	6.61101798894216e-18
CHPF	3.19605502298832e-22	0.328324480767906	0.678	0.43	7.68139864225013e-18
HMOX1	4.22321111725011e-22	0.304858695912121	0.515	0.279	1.01500655991989e-17
FAM43A	5.73613494524312e-22	0.29130865069498	0.534	0.304	1.37862267273973e-17
SEPT11	5.86269230556064e-22	0.337488709080061	0.624	0.416	1.40903946871845e-17
CA2	7.76408808300927e-22	0.341240171713215	0.576	0.335	1.86602092987045e-17
CEBPB	8.27620573836373e-22	-0.366988618589449	0.915	0.955	1.98910328715834e-17
RPS8	8.67321678170077e-22	0.270562331426953	0.988	0.997	2.08452092131396e-17
OPN3	1.20434360231097e-21	0.336439806135211	0.762	0.541	2.89451941379418e-17
TUBB6	1.36367099882796e-21	0.333732251007643	0.558	0.353	3.27744687858312e-17
TECR	2.29670577739354e-21	-0.284664396009908	0.845	0.904	5.51990266538764e-17
GLIPR1	4.4048885010136e-21	0.296353209536104	0.823	0.635	1.05867090233361e-16
KDELR1	5.17816356829433e-21	0.265286664771401	0.889	0.77	1.24451983200386e-16
TGFB1	5.8735325413862e-21	0.309721174757048	0.703	0.476	1.41164481099676e-16
PTH1R	1.11939943738269e-20	0.266624950912354	0.211	0.067	2.69036460780556e-16
SLC39A7	1.13138332170499e-20	0.270366625880955	0.548	0.322	2.71916667538577e-16
SSR2	1.57211253474599e-20	0.28525450228182	0.808	0.641	3.7784152660085e-16
SDCBP	1.99321820931278e-20	0.283409777781271	0.865	0.732	4.79050064426233e-16
PKP2	2.25197342683252e-20	-0.349640231188008	0.654	0.758	5.41239293404928e-16
HNRNPA1	2.65689673998165e-20	-0.272020318382559	0.829	0.896	6.38558562487189e-16
ARPC1B	4.90421123088659e-20	0.332934564211005	0.75	0.568	1.17867812723128e-15
MIF	5.94577543016121e-20	0.380492706977241	0.655	0.463	1.42900766688495e-15
TMED10	6.73873250167185e-20	0.303510231718772	0.798	0.648	1.61958696945181e-15
NPC2	7.55471428360741e-20	0.324083584409103	0.811	0.643	1.8157000309222e-15
RND3	1.0503383079076e-19	-0.386540236236208	0.143	0.334	2.52438308922512e-15
HES1	1.15291339682372e-19	-0.721516268606501	0.058	0.212	2.77091205792613e-15
RRAD	1.18473673325608e-19	-0.839661792520186	0.162	0.348	2.84739626470766e-15
EXTL3	1.57055671982929e-19	0.305546350482753	0.449	0.241	3.77467602043772e-15
FKBP11	2.12052732482591e-19	0.287132831927538	0.348	0.168	5.09647537248659e-15
RPS21	2.55436156633711e-19	0.27168834366724	0.943	0.912	6.13915258853462e-15
CEBPA	2.70559041164241e-19	-0.370836009089447	0.342	0.512	6.50261599534137e-15
C15orf48	3.62907425028863e-19	0.359186752681246	0.164	0.045	8.72211705314369e-15
EIF4EBP1	3.72358016572993e-19	0.255347961115578	0.418	0.221	8.94925257031532e-15
GCSH	4.46857604619924e-19	0.328181760308031	0.807	0.658	1.07397756694352e-14
PDE4DIP	6.69675319206732e-19	0.294626985711337	0.558	0.359	1.60949766218146e-14
FERMT2	8.07307514788307e-19	0.319650803319935	0.599	0.398	1.94028288104222e-14
MT1E	1.13091917587541e-18	-0.60317179133892	0.392	0.561	2.71805114729896e-14
BRD2	2.06524012432806e-18	-0.343876406852729	0.768	0.791	4.96359811481006e-14
RPS5	2.09016253365498e-18	0.255084058659758	0.942	0.933	5.02349663338639e-14
ACSL4	2.24690748083033e-18	0.283454909284524	0.45	0.247	5.40021743942762e-14
ABCA7	2.34075851948783e-18	0.263611236093499	0.459	0.26	5.62577902573706e-14
PRR15	2.81550813907756e-18	-0.292338178327847	0.092	0.25	6.76679226145901e-14
TMEM132A	3.13407431615161e-18	0.27212512974197	0.437	0.24	7.53243421143879e-14
SOCS3	3.15167624346835e-18	-0.425787697620042	0.386	0.556	7.57473868355183e-14
FABP5	4.69795702244403e-18	0.325133508631471	0.262	0.111	1.1291069907742e-13
ADAMTS1	5.35247722594052e-18	0.334751366431638	0.648	0.437	1.28641437648255e-13
SKIL	1.07280157297695e-17	0.283702628109252	0.607	0.401	2.57837130049281e-13
HCAR2	1.12509709870165e-17	-0.424624379551217	0.218	0.38	2.70405836701954e-13
SEC61G	1.30945461649847e-17	0.302446835084658	0.731	0.584	3.14714322529242e-13
SFRP1	1.3589460424308e-17	0.393214178628525	0.842	0.748	3.26609091837819e-13
PLOD3	1.40292463535095e-17	0.253382897777977	0.624	0.398	3.37178906860247e-13
RPL12	2.27335598933536e-17	0.250192820443471	0.972	0.963	5.4637837847686e-13
LAMA5	2.72644140866821e-17	-0.35679636243864	0.177	0.344	6.55272928159318e-13
CNPY2	3.32218359094411e-17	0.291450351523519	0.718	0.54	7.98453604247507e-13
IRX2	3.61458309385726e-17	-0.442021896769863	0.344	0.486	8.68728900777653e-13
RCN1	3.87753974447988e-17	-0.408623737170448	0.399	0.529	9.31927902188294e-13
ACSL3	4.45446413737826e-17	-0.346235435183846	0.136	0.292	1.07058591077749e-12
ATF4	4.75914708215591e-17	-0.277636425603744	0.725	0.768	1.14381340972535e-12
AL031777.3	4.86043021143743e-17	-0.284661752548047	0.063	0.205	1.16815579701687e-12
TMCO1	5.37207541332155e-17	-0.327809331470136	0.648	0.728	1.2911246048377e-12
CDC42EP1	8.32270233605536e-17	-0.384643431485581	0.266	0.424	2.00027827944755e-12
CAPG	1.56485483027672e-16	0.286679070385402	0.687	0.49	3.76097209908706e-12
NEBL	1.87294640908693e-16	-0.324374518208751	0.221	0.38	4.50143939959953e-12
SLC16A3	1.91388885955822e-16	0.270070574154292	0.826	0.73	4.59984048506221e-12
IER2	3.08000963536102e-16	-0.341430955159048	0.887	0.898	7.40249515762669e-12
TNFAIP3	3.09942701331609e-16	0.269405491826539	0.651	0.447	7.4491628838039e-12
CDH5	3.33056771429033e-16	0.257527953352609	0.219	0.088	8.00468644452538e-12
B4GALT1	4.7270866458544e-16	0.283374153752978	0.572	0.376	1.13610800446465e-11
DNAJA1	4.91318514253767e-16	-0.287831185216928	0.892	0.912	1.1808349171575e-11
SLC44A2	4.99798091825477e-16	0.26461778532177	0.579	0.385	1.20121473389335e-11
ART4	5.98005571727272e-16	-0.252913853285694	0.069	0.208	1.43724659108932e-11
LITAF	8.00776246154784e-16	0.330961971043166	0.531	0.348	1.92458563000841e-11
NCOA7	8.17242982009021e-16	-0.324529970937697	0.148	0.299	1.96416178296048e-11
LGALS3	8.70155467381713e-16	0.259651440500054	0.863	0.768	2.09133165030521e-11
HMGB1	9.34221973344323e-16	0.293654038283573	0.661	0.467	2.24530909073575e-11
MXRA8	9.7193064821997e-16	-0.313122810263982	0.512	0.654	2.33593811993188e-11
LTBP1	1.07628666172413e-15	0.618300150304088	0.327	0.181	2.58674736278779e-11
GPC1	1.12026066682533e-15	-0.366513690955171	0.444	0.554	2.69243448664799e-11
SMARCA1	1.14779191717663e-15	-0.442124903511081	0.322	0.461	2.7586030937423e-11
PPIC	1.49906505132598e-15	0.349076579145291	0.642	0.467	3.60285294435685e-11
TTC3	1.80641015426833e-15	0.291414158863485	0.763	0.576	4.34152616476851e-11
CRIP2	2.25376075462177e-15	-0.372296192126532	0.281	0.436	5.41668859765797e-11
IDH2	3.91995175913031e-15	0.26537494275502	0.746	0.581	9.42121205789378e-11
DUSP9	4.00427783355445e-15	-0.35195404754735	0.352	0.51	9.62388134516475e-11
FLNB	4.21359169897258e-15	0.276634434110251	0.909	0.85	1.01269462893107e-10
OSTC	4.47107704043253e-15	0.270063327469275	0.661	0.506	1.07457865589755e-10
PALLD	4.93960810034532e-15	0.262074642579739	0.652	0.458	1.18718541083699e-10
P4HA1	7.75880493481567e-15	0.269748989804016	0.753	0.586	1.8647511780336e-10
MICALL2	8.80259122161492e-15	-0.294349110893406	0.094	0.227	2.11561477420293e-10
ITIH5	9.13032633002053e-15	0.259004343153676	0.846	0.736	2.19438263015713e-10
KCNQ1OT1	1.10996465326785e-14	-0.420329009702666	0.798	0.807	2.66768904766394e-10
JAK1	1.24318490640212e-14	0.261023829165344	0.687	0.531	2.98787060404686e-10
PPP1R15A	1.29645370197065e-14	-0.260102942256326	0.808	0.807	3.11589682731627e-10
TIMP1	1.71034975594278e-14	-0.3555543534138	0.475	0.584	4.11065460343288e-10
MMP15	1.83477974378333e-14	0.29965853986904	0.177	0.064	4.40970963620884e-10
PDIA4	2.19432511001149e-14	0.29008422000553	0.703	0.576	5.27384096940161e-10
NSA2	2.81859984217818e-14	-0.276235023033375	0.716	0.782	6.77422286069104e-10
IFIT1	3.56882559708178e-14	-0.3651884455759	0.325	0.47	8.57731544002634e-10
RHOC	4.57025971795919e-14	0.258353374130612	0.654	0.48	1.09841622061431e-09
SQSTM1	5.8553740049901e-14	-0.283824821141839	0.683	0.732	1.40728058835932e-09
HEBP2	6.44220888861455e-14	0.266569377442675	0.807	0.657	1.54832048428962e-09
HLA-E	7.13980013587552e-14	0.298952924095346	0.889	0.797	1.71597956465632e-09
KCNJ2	9.42898872359879e-14	-0.251603993351537	0.05	0.167	2.26616314982973e-09
YBX3	1.12356853030556e-13	-0.340162290645409	0.382	0.502	2.70038460573638e-09
VEGFB	1.47188324727515e-13	-0.273775663114932	0.114	0.244	3.5375241965011e-09
ANP32B	1.47571154026412e-13	-0.305792888200861	0.513	0.601	3.54672511587079e-09
UCA1	1.5993745906928e-13	-0.266664182396197	0.061	0.178	3.84393689127107e-09
NFYB	2.60741245531966e-13	-0.363546653077271	0.219	0.349	6.26665509511527e-09
GBA	4.29888765554897e-13	-0.32466670923666	0.235	0.369	1.03319465913464e-08
SYF2	5.56161210682109e-13	-0.33395476392953	0.535	0.615	1.33667785375338e-08
MYADM	6.36049427877065e-13	-0.280457675368375	0.705	0.745	1.52868119495974e-08
TCEAL9	6.45435217697324e-13	-0.261684817725958	0.779	0.824	1.55123900221375e-08
CNTNAP3	8.03164985627879e-13	-0.260990345239661	0.083	0.205	1.93032672645805e-08
TPI1	8.67226193838902e-13	-0.261807403844911	0.772	0.807	2.08429143427242e-08
UGCG	9.82414075490136e-13	-0.385060569350589	0.189	0.316	2.36113398903299e-08
ITPRIPL2	1.31242467585623e-12	-0.264036500656276	0.121	0.252	3.15428146595286e-08
FLNA	1.53064290784882e-12	0.256690527077794	0.474	0.307	3.67874716472385e-08
ITGA6	1.62326267210739e-12	-0.404928852080178	0.355	0.463	3.9013495061429e-08
NOG	1.85352823167496e-12	0.337229507501302	0.367	0.221	4.4547697520076e-08
EFNB2	2.43533498639946e-12	-0.338633736058063	0.155	0.279	5.85308410631246e-08
TAPBP	3.36454735837446e-12	0.272433225239372	0.747	0.586	8.08635312111717e-08
KLF4	4.51017121246899e-12	-0.299604305562167	0.671	0.725	1.0839745492048e-07
CFLAR	8.37780093726489e-12	-0.30600194950001	0.373	0.477	2.01352067726224e-07
SERTAD1	1.08815374899165e-11	-0.346938177492707	0.503	0.56	2.61526872032653e-07
ADAM8	1.28180321611824e-11	-0.330589222431115	0.319	0.436	3.08068584961857e-07
PLEC	1.29227800284985e-11	-0.288054949094066	0.235	0.361	3.10586095204933e-07
A4GALT	1.4981997704203e-11	-0.250695739999193	0.145	0.268	3.60077332822815e-07
CTGF	2.30897288670979e-11	0.296124559523388	0.211	0.103	5.54938543591832e-07
IER5	2.45223445077998e-11	-0.357470439722664	0.49	0.564	5.8937002790046e-07
ZFP36L2	4.38851291625819e-11	-0.275004496268055	0.187	0.318	1.05473519429349e-06
TCEA3	6.48105573162361e-11	-0.320494782154413	0.281	0.4	1.55765693453842e-06
TSTD1	2.44151210131881e-10	-0.254049520727315	0.238	0.361	5.86793018430962e-06
AC108134.2	2.76889384761134e-10	-0.35535983749282	0.092	0.195	6.6547594733491e-06
CHIC2	2.97702291675752e-10	-0.253520685992636	0.276	0.395	7.15497687813502e-06
BTG1	3.6750283274552e-10	-0.255431445645668	0.677	0.703	8.83256308220583e-06
MYLIP	4.231838502053e-10	-0.31695238299115	0.447	0.529	1.01708006558342e-05
SP100	4.46967733515644e-10	-0.257267705637733	0.512	0.589	1.0742422507315e-05
CYB5R1	8.49364390626038e-10	-0.301641951099256	0.427	0.504	2.04136237643062e-05
GTF2I	8.89458812925384e-10	-0.279029601551696	0.487	0.551	2.13772531098487e-05
ANKRD9	1.26998386969517e-09	-0.264807445204585	0.197	0.308	3.05227923242538e-05
HSPB1	1.30619936495803e-09	0.272158064302407	0.737	0.601	3.13931955374012e-05
HEXIM1	1.90110703660282e-09	-0.271506223229683	0.322	0.427	4.56912065177123e-05
BBX	2.10716349194905e-09	-0.292715654382409	0.455	0.525	5.06435673655034e-05
MARCKS	2.60973687962897e-09	-0.327187865800158	0.279	0.389	6.27224161650026e-05
CCNE1	2.6760868636797e-09	-0.253840124414618	0.886	0.905	6.43170716816779e-05
SNHG12	3.53474926598067e-09	-0.252221585047195	0.178	0.288	8.49541638585793e-05
ELF3	3.74271103177196e-09	-0.287013213894025	0.386	0.468	8.99523169376072e-05
IRF2BPL	4.48145401629933e-09	-0.256858332146541	0.461	0.533	0.000107707265827738
COMT	4.76692988521035e-09	-0.273505577241107	0.392	0.484	0.000114568392861145
USP53	5.59915506806031e-09	-0.261614508398486	0.341	0.435	0.000134570092905762
FTL	6.09596643809145e-09	-0.468774069896341	0.93	0.896	0.00014651045737309
STEAP4	6.64897276988053e-09	-0.28934188315398	0.113	0.209	0.000159801411551309
CAPN1	8.250518569545e-09	-0.270787175560947	0.349	0.431	0.000198292963300444
DDIT3	9.87264563568819e-09	-0.280872827283057	0.139	0.237	0.00023727916520813
NFIL3	1.03492178486231e-08	-0.335251394635127	0.32	0.406	0.000248733101773808
ADM	1.04641043491039e-08	-0.28476154888544	0.855	0.857	0.000251494283926362
HIST1H2AC	1.61924571570788e-08	-0.25549594288674	0.327	0.43	0.000389169515313231
THUMPD3-AS1	1.89708929873253e-08	-0.269906073880624	0.213	0.309	0.000455946442057376
NDRG1	2.01049014278404e-08	-0.320592734432771	0.387	0.465	0.000483201200916715
BTG2	2.03635388740113e-08	-0.300039014593624	0.183	0.287	0.000489417293297989
SMS	2.11466858652774e-08	-0.256568786437414	0.528	0.578	0.000508239448086076
NASP	3.11337756037032e-08	-0.266267455143473	0.484	0.54	0.000748269162859403
IFIT3	3.28973756249733e-08	-0.322390817197473	0.358	0.453	0.000790655525770609
VSIG10	4.38796627902508e-08	-0.250297528249303	0.288	0.375	0.00105460381550089
AMD1	5.87070335443766e-08	-0.252610866965842	0.724	0.754	0.00141096484420555
PRG2	6.0512995750522e-08	0.631899006377189	0.465	0.36	0.00145436933986805
UBL3	6.07970119592378e-08	-0.263210143109883	0.599	0.63	0.00146119538542832
TEAD1	6.40487888254522e-08	0.258819942051953	0.849	0.755	0.00153934859063092
NMI	6.81411955923553e-08	-0.263729827341927	0.339	0.421	0.00163770549486667
EGR1	8.06281942199775e-08	-0.308455192487427	0.703	0.699	0.00193781801988294
PLA2G16	8.66459700667699e-08	-0.277731336436223	0.412	0.491	0.00208244924458475
TUT4	1.0977546242754e-07	-0.253796497612316	0.329	0.4	0.00263834346398349
S100A10	2.84361914483235e-07	-0.341532419101136	0.564	0.605	0.00683435425269007
NECTIN4	3.30712200821208e-07	-0.275516738374408	0.415	0.485	0.00794833703453691
AC245041.2	3.49153554964075e-07	-0.251137144146821	0.25	0.334	0.00839155654000658
TAC3	4.20189605235135e-07	1.24359031396771	0.102	0.045	0.0100988369722212
PTMS	4.54171457225513e-07	-0.256940134227343	0.567	0.584	0.010915556802958
EFEMP1	4.71446764602652e-07	-0.270258156091343	0.412	0.472	0.0113307515404601
SLC39A8	5.03082838616468e-07	-0.255004503135695	0.5	0.543	0.0120910929433082
IFIT2	5.10097961189319e-07	-0.421245916324119	0.08	0.16	0.0122596943992241
HSPA1A	1.45426565172013e-06	-0.402773758681401	0.428	0.509	0.0349518206734415
