# Supplementary material for: Regionally distinct trophoblast regulate barrier function and invasion in the human placenta
Source: eLife. 2022 Jul 7;11:e78829. doi: 10.7554/eLife.78829 (PMC9323019; doi:10.7554/eLife.78829)
Supplement: Figure 5—source data 2. [file elife-78829-fig5-data2.csv]

	p_val	avg_logFC	pct.1	pct.2	p_val_adj
CSH1	0	3.10007543313971	0.79	0.093	0
CDA	1.87479383399125e-250	-1.13686118884632	0.127	0.647	4.50587950061457e-246
KRT14	1.15622561126953e-216	-1.21708833036917	0.277	0.731	2.77887263412518e-212
UPK1B	7.2620966630649e-211	-1.17043739904578	0.322	0.742	1.74537231200102e-206
CTSL	5.18216037126903e-201	0.862637882470106	0.973	0.809	1.2454804236308e-196
FBLN1	1.00996155179778e-194	0.606679933943953	0.993	0.938	2.42734159359079e-190
RPS29	9.81542570008652e-176	-0.463902576355276	0.993	0.995	2.35903941275879e-171
PAPPA	1.01076644750498e-172	0.985501032992162	0.914	0.585	2.42927607993346e-168
IFITM3	1.93541038861252e-166	-0.759005906200662	0.599	0.891	4.65156532799133e-162
RALBP1	1.31720997186934e-165	0.764070125314114	0.866	0.607	3.16578244639077e-161
HTRA1	1.41713665384232e-162	0.756439934492444	0.982	0.918	3.40594623384464e-158
CPM	1.69568421462461e-162	0.751466677593395	0.789	0.445	4.07540744142879e-158
ITM2C	1.47982997576106e-148	0.665134047284954	0.445	0.069	3.55662336374414e-144
COL5A1	4.96122095152822e-141	-0.75596892579433	0.202	0.573	1.19237984349029e-136
TIMP2	4.54076577406154e-139	0.687958747212971	0.983	0.955	1.09132764613795e-134
MMP11	1.59326413869086e-137	0.790135198213486	0.703	0.328	3.82925103092962e-133
LTBP1	5.33366917464085e-128	0.619588162650093	0.869	0.658	1.28189404943318e-123
COTL1	1.67710084165919e-125	0.444228559783695	0.964	0.901	4.0307441628437e-121
HTRA4	1.29659489512249e-121	1.24439429731085	0.588	0.251	3.1162361709374e-117
TP53I11	1.59272007007018e-121	0.464589205299156	0.313	0.018	3.82794341640667e-117
ANXA2	3.27016217155722e-121	-0.401005874507071	0.973	0.995	7.85950776312062e-117
BACE2	4.74761920389323e-121	0.566732343861977	0.489	0.138	1.1410427994637e-116
PRDX4	4.83757617853313e-118	0.580035858318093	0.887	0.748	1.16266305874865e-113
KRT17	6.52053163622629e-111	-0.852142451213947	0.141	0.461	1.56714457345063e-106
DUSP4	3.58199093859364e-107	0.539874128952742	0.405	0.09	8.60895702181595e-103
B2M	1.12585394960542e-106	0.483739669944827	1	0.998	2.70587738248166e-102
PAEP	1.65532907308942e-105	-0.392090000477868	0.026	0.269	3.9784178942631e-101
LAMB3	4.14025952785377e-104	-0.571379586051329	0.066	0.344	9.95069974924376e-100
MALAT1	5.08429940926143e-104	-0.314116512784102	0.998	0.998	1.22196052002189e-99
AOC1	3.62037263705767e-103	0.623819360411582	0.927	0.61	8.7012035959044e-99
ISM2	3.52879837156558e-100	0.446876328159127	0.993	0.961	8.48111400622072e-96
LY6E	4.85679801789945e-100	-0.539205925414008	0.546	0.817	1.16728283562195e-95
ENG	7.83644823330213e-98	0.499877349679678	0.915	0.823	1.88341196839183e-93
KRT8	2.76106659499906e-97	-0.305916213272982	0.999	1	6.63594745442073e-93
VWCE	4.19446736525042e-97	0.522638088883233	0.534	0.21	1.00809828656429e-92
BGN	2.85513549447999e-95	0.634961334287659	0.879	0.709	6.8620326474332e-91
PLPP2	1.83363797835083e-91	0.435586452244012	0.302	0.044	4.40696551716837e-87
ACVRL1	2.39483846909818e-91	0.499391393675325	0.309	0.05	5.75575477663056e-87
S100A16	6.16079330138635e-91	-0.511511082060421	0.041	0.271	1.48068506205519e-86
SERF2	1.36366625355917e-89	0.309374471928761	0.987	0.986	3.2774354738041e-85
QSOX1	1.85534459485665e-89	0.339506085068383	0.99	0.968	4.45913519927847e-85
PTN	1.25708291596609e-85	0.4872084980104	0.838	0.657	3.02127308023289e-81
TXN	3.38673705979582e-85	-0.395567738528706	0.923	0.973	8.13968384951326e-81
HLA-E	1.0659484577889e-83	0.453614511119584	0.919	0.826	2.56190052344984e-79
ISG15	1.96338263532038e-82	-0.516466314719701	0.768	0.904	4.71879382572899e-78
LAMA3	3.44151231668707e-82	-0.615627623291015	0.275	0.568	8.27133070192571e-78
HPGD	7.31027123140943e-82	-0.316505256698116	0.997	0.998	1.75695058775694e-77
UGP2	9.55287194602844e-82	-0.444679602839731	0.835	0.938	2.29593724350847e-77
NUPR1	1.13480159769808e-80	-0.515499911289838	0.069	0.301	2.72738215990756e-76
SERPINE2	3.73865527571863e-80	0.538457608555062	0.985	0.913	8.98548408966215e-76
TNNT3	4.37227774256676e-80	-0.405333766605955	0.011	0.19	1.0508332326485e-75
LVRN	6.28742810378828e-79	0.514671701226849	0.838	0.56	1.51112047046448e-74
PSAP	2.48155469497678e-78	0.31311245122884	0.991	0.982	5.96416855390719e-74
MFSD2A	5.30336672922701e-78	0.547607063376371	0.495	0.204	1.27461115970242e-73
SSR4	1.01763316372811e-75	0.362080600980124	0.926	0.866	2.44577954570414e-71
ACSL3	1.70289634795492e-74	-0.528812255399949	0.242	0.5	4.09274108267486e-70
LGALS3BP	2.97885420149804e-74	0.33391540809965	0.967	0.936	7.15937818788039e-70
ASPSCR1	1.08060934081968e-73	0.607753306295875	0.847	0.7	2.59713648972601e-69
FABP7	2.75399517347264e-73	-1.04611358168906	0.125	0.358	6.61895199992415e-69
PMEPA1	9.62072758803309e-72	0.406265508953928	0.419	0.145	2.31224566850787e-67
TFPI2	1.18642324218618e-71	0.548594848434796	0.356	0.109	2.85144962027027e-67
DNASE1L3	1.79071866272519e-71	0.642943130276236	0.198	0.012	4.30381323399373e-67
TCIM	2.06587881614773e-69	-0.614633673822319	0.329	0.583	4.96513314672945e-65
FGFR1	2.23542043570276e-69	0.501398552429338	0.824	0.611	5.37260947516801e-65
PAPPA2	8.16341953196534e-69	0.375777126266758	0.994	0.982	1.96199625031255e-64
ODAPH	2.18132948159939e-68	-0.442135163662168	0.069	0.278	5.24260727607597e-64
ITM2B	1.38391782869569e-67	0.321809975372489	1	0.999	3.32610810948723e-63
MT-ND2	1.63905573811182e-66	0.343608584368306	0.995	0.996	3.93930656097794e-62
HLA-C	3.46398611233181e-65	0.487857427723473	0.86	0.699	8.32534422237827e-61
GDF15	1.74300879185122e-64	0.412817432538409	0.789	0.532	4.18914733033523e-60
MAG	2.83846879518231e-63	0.309633919539806	0.265	0.058	6.82197590234118e-59
HIP1	3.15718104732069e-63	0.396245801429538	0.418	0.174	7.58796892913056e-59
COL12A1	6.38185618198396e-63	-0.294817228603704	0.045	0.226	1.53381531477803e-58
SOX4	1.13902574787554e-62	0.462676917444923	0.861	0.715	2.73753448244407e-58
MT-ND1	2.30040602002911e-62	0.269452305809628	0.995	0.995	5.52879582853797e-58
ADAM12	2.38950162287648e-62	0.353180136498372	0.961	0.881	5.74292820042134e-58
MYCNUT	4.88129722881335e-62	0.387635224214826	0.378	0.143	1.173170975973e-57
RPS4X	7.31820993149599e-62	-0.262853200809311	0.987	0.995	1.75885857493575e-57
ACTB	1.54203943824123e-61	-0.276858858441062	0.996	0.999	3.70613758586897e-57
CD40	3.07368087749006e-61	-0.284972474195942	0.039	0.213	7.3872846209596e-57
HEXB	4.54283194256733e-61	0.409955790990797	0.98	0.934	1.09182422907663e-56
FUCA2	1.13237579214581e-60	0.433987686190328	0.633	0.395	2.72155197884324e-56
SERPINE1	1.39833373118694e-60	-0.438731885030916	0.963	0.986	3.3607552895347e-56
SLC2A1	2.10955952064721e-60	-0.497525124444069	0.67	0.802	5.0701153519235e-56
SLC30A2	3.69282926888079e-59	0.430462386909658	0.258	0.059	8.87534586482808e-55
PDIA3	4.29323689362596e-59	0.326118066302708	0.948	0.861	1.03183655501406e-54
TAC3	6.68193447662744e-59	1.44646035310966	0.309	0.097	1.60593613211264e-54
CKAP4	1.52962542788114e-58	0.458895238355627	0.686	0.476	3.67630175336954e-54
TGFB1	7.00528904527349e-58	0.394934023975445	0.6	0.358	1.68365116914103e-53
MT-CO2	1.33293490554055e-56	0.259060347296985	0.997	0.995	3.20357575197615e-52
PTMS	8.99132832168051e-55	-0.438196310571084	0.34	0.549	2.16097584883269e-50
ENO1	1.15778011717704e-54	-0.298165238009389	0.886	0.941	2.78260873362329e-50
YBX1	1.30942246391367e-54	0.263608526163226	0.957	0.92	3.14706594977012e-50
SOD1	1.52837649966898e-54	0.412885868133672	0.816	0.659	3.67330007930442e-50
EVL	5.33912846660334e-54	0.34762681150372	0.44	0.206	1.28320613566345e-49
APOE	6.97854879399339e-54	0.274726502887489	0.219	0.045	1.67722441714837e-49
HMGB3	1.1583917236915e-53	-0.385595454294568	0.962	0.976	2.78407866872014e-49
ITGA5	5.19287547989681e-53	-0.292253238594828	0.903	0.959	1.2480556928384e-48
MTRNR2L12	2.03990561942849e-52	-0.459627547026223	0.64	0.779	4.90270916573443e-48
TNFSF10	2.51427976786902e-52	-0.401369195857365	0.961	0.986	6.0428199940964e-48
TTC3	2.67194681119889e-52	0.331272050310148	0.849	0.722	6.4217569660354e-48
STAT4	3.66601099799368e-52	-0.308603011964991	0.087	0.269	8.81089083257801e-48
STMN1	4.2698088549403e-52	0.431485138452714	0.577	0.331	1.02620586019635e-47
BZW2	7.41475363587502e-52	-0.267041826574582	0.963	0.983	1.7820618888462e-47
ARRDC3	7.52022686263891e-52	-0.465101549442241	0.242	0.448	1.80741132416664e-47
SELENOW	1.3909683651768e-51	0.397200848586968	0.669	0.449	3.34305336886592e-47
LY6K	2.55883677820927e-51	0.388045273737096	0.562	0.331	6.14990831274816e-47
TMED3	3.55178599868925e-51	0.398660077760777	0.783	0.636	8.53636246924974e-47
FASN	4.66022364730831e-51	-0.458187940788926	0.31	0.516	1.12003815139408e-46
CD59	8.0644821081889e-51	-0.324623740797378	0.737	0.836	1.93821762988212e-46
SQSTM1	1.05302681751734e-50	0.34946636066557	0.87	0.767	2.53084465322118e-46
POMC	2.88845160744227e-50	0.440070900929134	0.272	0.082	6.94210459332676e-46
CTSB	3.1912833394621e-50	0.350535459717932	0.765	0.598	7.6699303780632e-46
CSH2	7.56021561631757e-50	0.48968579523816	0.134	0.005	1.81702222122577e-45
PRG2	7.5903510747632e-50	0.388251196508028	0.984	0.884	1.82426497730859e-45
FOSB	1.84211446851415e-49	0.301348795372004	0.951	0.884	4.42733791362691e-45
RPS4Y1	2.323673043066e-49	0.418851284816722	0.482	0.245	5.58471579170483e-45
CST6	9.54023533794005e-49	-0.477200240040314	0.621	0.758	2.29290016112051e-44
LDHA	1.66395685258247e-48	-0.47178006884663	0.765	0.852	3.9991538994967e-44
EGFR-AS1	2.29633926420016e-48	0.385906494090451	0.683	0.455	5.51902178757865e-44
CST3	6.06565246371602e-48	0.408942581416529	0.456	0.243	1.45781891312951e-43
FYB1	7.71351959804558e-48	0.352286297557225	0.445	0.226	1.85386730019427e-43
SELENOM	2.1672990567516e-47	0.346367298870985	0.8	0.662	5.2088865529968e-43
TIMP3	4.90180622455672e-47	0.275185226594826	0.999	0.999	1.17810010800996e-42
PLCG2	6.32128010129389e-47	-0.415313870380153	0.608	0.758	1.51925645954497e-42
GRK3	3.51189921558033e-46	0.263803588736504	0.241	0.07	8.44049857472577e-42
COL17A1	7.08608809815485e-46	-0.273623612046285	0.868	0.953	1.70307041351054e-41
MTRNR2L8	8.8787046566982e-46	-0.469366195644051	0.524	0.678	2.13390787719085e-41
LGMN	1.38889370057526e-45	0.369201659654718	0.536	0.324	3.33806711996259e-41
DYNLL1	1.98259163689226e-45	-0.307397268079791	0.818	0.91	4.76496074010685e-41
HK2	3.96726555883954e-45	-0.356810327035286	0.107	0.279	9.53492604411496e-41
LAMP1	7.16474645947415e-45	0.307553667388013	0.755	0.591	1.72197516407002e-40
ASAH1	1.28086272051898e-44	0.38744658129931	0.532	0.322	3.07842546249531e-40
CAV1	1.68897807829541e-44	-0.445387503798808	0.532	0.68	4.05928991337518e-40
MT-CYB	6.75008649726272e-44	0.310301215183003	0.991	0.99	1.62231578875212e-39
CYP11A1	9.64124694126392e-44	-0.294895628584207	0.792	0.904	2.31717728986337e-39
IMPA2	1.17100194045464e-43	0.363033034508896	0.681	0.491	2.81438606368868e-39
MMP19	2.63860348043909e-43	-0.341911142145909	0.118	0.291	6.34161960488731e-39
BSG	5.29331064089886e-43	0.282340843619568	0.879	0.785	1.27219427943363e-38
RND3	9.64602547065224e-43	-0.442725894875884	0.294	0.487	2.31832576161656e-38
RNASET2	1.35334468622884e-42	0.349322525442227	0.313	0.131	3.2526286188824e-38
MFAP2	3.68264442165325e-42	0.333746959114919	0.653	0.437	8.85086760300142e-38
PLSCR1	6.47716809025432e-42	-0.328256548816481	0.479	0.657	1.55672257881172e-37
XIST	1.53206110775404e-41	-0.353055737947872	0.269	0.488	3.68215566637605e-37
FKBP10	2.45235101130626e-41	0.260454786058061	0.192	0.046	5.89398042057347e-37
NEAT1	3.11822519426618e-41	0.287468393713387	0.957	0.912	7.49434243189934e-37
DDIT4	7.6271873712994e-41	-0.458639993954376	0.135	0.311	1.8331182128181e-36
IFIT1	8.51799607238252e-41	-0.290427490432744	0.106	0.274	2.04721517603641e-36
PEA15	1.16659127681691e-40	0.342158713411601	0.553	0.36	2.80378547470177e-36
PDGFRL	1.80288773267618e-40	0.336418769850115	0.297	0.12	4.33306037671394e-36
SLC23A2	2.56967051506598e-40	0.306029843476654	0.399	0.2	6.17594611590958e-36
PSG5	3.04777678751787e-40	-0.277367923268328	0.356	0.58	7.32502673112044e-36
TSPO	6.93957272907862e-40	0.320014349463816	0.734	0.514	1.66785690970675e-35
HAPLN3	7.12487825513749e-40	0.337478969262202	0.239	0.08	1.71239323983974e-35
CRABP2	1.8939597889874e-39	0.262824962594828	0.123	0.011	4.55194295685231e-35
KCNJ2	2.56659593058114e-39	-0.375208710165	0.194	0.374	6.1685566595587e-35
PTGDS	3.59456647904288e-39	-0.688815221168947	0.045	0.174	8.63918107573165e-35
SOD3	1.06572518428969e-38	-0.329173155870258	0.571	0.749	2.56136390792184e-34
HIST1H4C	3.76675156213163e-38	-0.375003721837358	0.601	0.727	9.05301070442717e-34
LIFR	5.8715775355051e-38	0.267875057251008	0.257	0.093	1.4111749448833e-33
TMEM91	1.84796986493714e-37	0.337420214644834	0.395	0.21	4.44141077338993e-33
KIAA0930	2.83648073652666e-37	0.28127769812364	0.343	0.164	6.81719780216819e-33
PSG2	4.07605816431245e-37	0.710711688864181	0.608	0.463	9.79639819210855e-33
GLO1	6.57570429693927e-37	-0.343720989096434	0.473	0.631	1.58040477072638e-32
RASL11B	8.09828753934653e-37	0.309955459782151	0.207	0.063	1.94634242720655e-32
ERVMER34-1	1.69689397698233e-36	0.253098191151572	0.191	0.052	4.07831498427933e-32
TFPI	1.85339567154206e-36	0.337956008154883	0.735	0.57	4.45445115698419e-32
SEMA5A	2.47662810563178e-36	-0.351239254599683	0.361	0.539	5.95232798907543e-32
HLA-G	2.93129927360014e-36	0.290469097449467	0.961	0.83	7.04508467417058e-32
KDELR3	3.10797039558441e-36	0.311633425300568	0.544	0.354	7.46969604874757e-32
GALM	3.65378230734942e-36	0.271528778141636	0.354	0.172	8.7815003974836e-32
TLE3	3.84265495576833e-36	0.321919491720051	0.497	0.315	9.2354369206936e-32
ZFP36	5.79510313223462e-36	-0.392552857460028	0.273	0.441	1.39279508680127e-31
P4HA2	1.02586067780073e-35	0.291594366408311	0.455	0.264	2.46555355302626e-31
PRCP	4.15007253167388e-35	0.33194173082236	0.73	0.558	9.97428432262501e-31
KRT18	6.18690586000793e-35	-0.251197185731511	0.999	0.999	1.48696095439431e-30
CLDN4	9.47380972528543e-35	-0.264975763622711	0.765	0.852	2.2769354293751e-30
KLF6	1.09468568924441e-34	0.269908189359488	0.917	0.859	2.63096758553e-30
CREB5	1.73413844095925e-34	0.349577102869172	0.518	0.346	4.16782832900146e-30
EMILIN2	1.92574344671528e-34	-0.266077614212009	0.055	0.179	4.62833179983549e-30
CAMK2N1	3.66219838675432e-34	-0.38488680157508	0.439	0.591	8.80172760272534e-30
LGALS3	3.77834581555926e-34	-0.294096650983072	0.95	0.979	9.08087633311513e-30
SNX10	9.82759457393574e-34	0.255641764746073	0.308	0.142	2.36196407989972e-29
L1TD1	1.15987764307376e-33	-0.286933182669687	0.166	0.324	2.78764992736348e-29
BEX3	1.67616775304829e-33	-0.302154978928354	0.537	0.692	4.02850157767626e-29
HERC1	1.8363342144701e-33	0.335285395438268	0.545	0.396	4.41344565105743e-29
VKORC1	1.89453967725598e-33	0.294044240304956	0.485	0.303	4.55333666031703e-29
EGLN3	2.25884614512449e-33	-0.275398621713116	0.705	0.872	5.42891082519219e-29
CSRP2	2.37716722683632e-33	-0.341069732769835	0.528	0.662	5.7132837129784e-29
ARPC1B	3.81210364821307e-33	0.314128804744164	0.816	0.693	9.16200990811528e-29
CAV2	3.82734752043064e-33	-0.278219343547928	0.473	0.632	9.198647030603e-29
SPON2	4.21745422181196e-33	0.714495267632826	0.244	0.096	1.01362294767029e-28
BST2	8.4777665229712e-33	0.339926085678928	0.643	0.437	2.0375464061309e-28
RFK	8.93292716702831e-33	-0.309279418474138	0.507	0.656	2.14693971532358e-28
XAGE3	1.09123331807804e-32	-0.514745468950162	0.385	0.535	2.62267015666877e-28
HUNK	1.09319739036952e-32	0.261919184898335	0.274	0.118	2.62739060801409e-28
LHFPL6	2.88490065749632e-32	0.258135205511102	0.898	0.808	6.93357024022666e-28
MAGED1	1.76844577496076e-31	0.292381666126715	0.755	0.621	4.25028257554069e-27
ABCA7	6.51843144972064e-31	0.286447533798871	0.421	0.252	1.56663981462586e-26
KLF2	9.09289699491971e-31	0.446161676809445	0.24	0.101	2.185386863759e-26
EZR	1.1646537088497e-30	0.26050806017881	0.93	0.9	2.79912872384938e-26
SAMD9	4.15793938092145e-30	-0.269034751325087	0.22	0.38	9.9931915081066e-26
C2orf72	6.42829960046975e-30	0.261530626731745	0.412	0.241	1.5449775259769e-25
GDPD3	6.59104444735695e-30	-0.301601174193689	0.448	0.597	1.58409162247777e-25
PDIA5	7.07626772865641e-30	0.325804650933745	0.616	0.458	1.70071018590528e-25
UBE2L6	7.66338375754718e-30	-0.266937792839653	0.272	0.434	1.84181765228889e-25
TGM2	8.48519046594241e-30	-0.378840662250364	0.11	0.242	2.0393306765846e-25
DLX5	1.17933704824862e-29	0.31155921079879	0.481	0.311	2.83441866176074e-25
CHIC2	1.53244414714815e-29	-0.263765277539866	0.412	0.558	3.68307626325586e-25
AC245041.2	1.77050698293851e-29	-0.286347392908279	0.221	0.375	4.25523648279441e-25
RHOB	1.88560582744293e-29	0.37807260435113	0.766	0.624	4.53186504567633e-25
EPSTI1	2.95110774295874e-29	-0.258352180897044	0.399	0.555	7.09269234942702e-25
IL18BP	3.69779300935408e-29	0.307740848459392	0.279	0.134	8.88727571868161e-25
TAPBP	4.16646349733745e-29	0.272071668328826	0.776	0.692	1.00136783695008e-24
CHPF	4.27386696228992e-29	0.279930382558463	0.732	0.596	1.02718118571676e-24
TNFAIP8	5.66569926580946e-29	-0.254771766503316	0.606	0.723	1.36169416154465e-24
CTSZ	6.87818540411493e-29	0.292211141897005	0.656	0.501	1.65310308002498e-24
RCN1	7.84138546022267e-29	-0.324150036139577	0.208	0.357	1.88459858150992e-24
NT5E	2.88181656639001e-28	-0.281174179403688	0.197	0.348	6.92615793566176e-24
EIF3J	2.9828195612447e-28	-0.252566000397564	0.721	0.814	7.16890853349552e-24
LINC02246	3.52736274414315e-28	-0.252930529174756	0.788	0.864	8.47766361927366e-24
GPRC5A	6.41454194991866e-28	-0.330403128707016	0.343	0.497	1.54167101224345e-23
PGK1	7.24245689708499e-28	-0.26552251307341	0.6	0.709	1.74065209064541e-23
PLA2G16	1.44683830945835e-27	-0.280728603798853	0.29	0.448	3.4773311929522e-23
PCYOX1	1.88995066345284e-27	0.285581957892146	0.492	0.331	4.54230742454255e-23
REL	2.61857827462101e-27	0.251143342598052	0.432	0.265	6.29349102522413e-23
DNAJC1	2.8106871777228e-27	0.268032738384594	0.482	0.321	6.75520556293898e-23
IL2RB	2.84557338350614e-27	0.256449578815489	0.824	0.727	6.83905106991865e-23
TNFAIP3	5.61589610073573e-27	0.297103914695725	0.679	0.519	1.34972446885083e-22
SMS	6.10052922288351e-27	-0.253908054108292	0.414	0.559	1.46620119342782e-22
ZNF292	8.28190500672721e-27	0.276327927044631	0.622	0.468	1.99047304931682e-22
UBL3	9.07867651210683e-27	-0.276922153382446	0.664	0.744	2.18196911291976e-22
MT1E	1.10564219731214e-26	-0.483618726994858	0.222	0.373	2.65730045702001e-22
NDRG1	2.2700896896873e-26	-0.361960731230037	0.575	0.671	5.45593356019445e-22
COPRS	2.99144363234487e-26	0.264664547648642	0.37	0.216	7.18963562597767e-22
SMAD3	3.18993466506238e-26	0.252986966630428	0.355	0.204	7.66668897401092e-22
CARHSP1	4.38650770784373e-26	-0.305941447481464	0.373	0.496	1.05425326250316e-21
EIF2AK2	6.27177296207237e-26	-0.25982419538164	0.574	0.682	1.50735791370447e-21
DUSP1	3.73419491242316e-25	0.250754844899596	0.928	0.859	8.97476405251781e-21
SLC39A8	4.13826479018792e-25	-0.289932751985835	0.358	0.49	9.94590559673764e-21
ACTN1	9.47173698531283e-25	-0.259843467983949	0.546	0.646	2.27643726705009e-20
SLC12A8	1.14280738299108e-24	0.352307352073684	0.25	0.121	2.74662326428075e-20
MMP2	3.66734939931665e-24	0.564907542068662	0.221	0.104	8.81410754631763e-20
TGFBI	4.04556619013527e-24	-0.711936553316314	0.025	0.103	9.72311378137111e-20
SPRR2G	9.76359743145249e-24	-0.457550351419953	0.046	0.138	2.34658300667529e-19
CLIC3	1.21175130713401e-23	-0.528812191263835	0.787	0.809	2.91232309156587e-19
PLA2G7	1.85591503560334e-23	0.276258693643969	0.443	0.28	4.46050619656907e-19
HES1	2.51396322915353e-23	-0.637962199100757	0.099	0.209	6.0420592249476e-19
SCARB2	5.48417753427544e-23	0.257587066992676	0.616	0.478	1.31806722858776e-18
ITGA6	1.79638018658764e-22	-0.258571318114283	0.267	0.4	4.31742014044473e-18
CTNNB1	2.70554924782628e-22	-0.259998082701365	0.369	0.486	6.50251706222569e-18
PLOD2	9.76211635013495e-22	-0.308407723546212	0.598	0.694	2.34622704359143e-17
UGCG	1.70436556266035e-21	-0.269494226546075	0.465	0.592	4.09627219329789e-17
SHISA5	3.87080347173161e-21	0.273604828458692	0.62	0.516	9.30308906395975e-17
CAVIN3	6.65797022161967e-21	-0.250091647234151	0.19	0.311	1.60017656306407e-16
DST	1.05802755675887e-20	-0.268410901990902	0.271	0.389	2.54286342991428e-16
MX1	1.92883009868549e-20	-0.277013616203979	0.194	0.315	4.63575025918071e-16
INTS6	2.0768247504308e-20	-0.292738050271828	0.34	0.45	4.99144060518538e-16
AP3S1	7.79136609938873e-20	-0.254702758636472	0.737	0.794	1.87257692832709e-15
GADD45B	1.00866330510005e-19	-0.321421096774152	0.439	0.532	2.42422138747746e-15
TINAGL1	7.2840148349189e-19	-0.337404751684834	0.311	0.433	1.75064012542441e-14
SMARCA1	1.64580892895974e-17	-0.269494464891586	0.297	0.405	3.95553717986183e-13
ESAM	6.68901830507469e-17	0.258492102124331	0.249	0.146	1.60763865944165e-12
GATA2	5.30171643054526e-16	0.251621850296336	0.723	0.633	1.27421452691725e-11
UXS1	6.62257456103542e-16	0.257590848992612	0.516	0.395	1.59166956999925e-11
MT2A	8.65674625771756e-14	-0.561005523146305	0.276	0.395	2.08056239557984e-09
RRAD	8.30542119151368e-11	-0.25393070738918	0.746	0.794	1.9961249291684e-06
JUN	1.59512797359272e-09	-0.402837702698613	0.459	0.512	3.83373057173275e-05
HILPDA	1.60632364404317e-09	-0.285685847023345	0.384	0.45	3.86063824609337e-05
