# Supplementary material for: Regionally distinct trophoblast regulate barrier function and invasion in the human placenta
Source: eLife. 2022 Jul 7;11:e78829. doi: 10.7554/eLife.78829 (PMC9323019; doi:10.7554/eLife.78829)
Supplement: Figure 5—source data 3. [file elife-78829-fig5-data3.csv]

	p_val	avg_logFC	pct.1	pct.2	p_val_adj
CSH1	1.38919548638747e-274	1.69416877056529	0.891	0.307	3.33879243198366e-270
ITM2C	4.41236196182838e-251	0.9162442924917	0.843	0.323	1.06046707390583e-246
CDA	2.81795780096818e-228	-1.00237547752848	0.178	0.665	6.77267977884692e-224
KRT8	1.80048148372875e-223	-0.520701186480476	1	1	4.32727719799368e-219
IFITM3	4.52658224339174e-216	-0.962369987901702	0.623	0.931	1.08791877637677e-211
HTRA1	8.70139834796916e-216	0.667591437882319	0.998	0.984	2.09129407895091e-211
LTBP1	5.44023784476103e-205	0.648591058669402	0.99	0.909	1.30750676360987e-200
ANXA2	4.94497325710615e-194	-0.563627885356345	0.992	0.993	1.18847487261289e-189
HTRA4	1.90887453525498e-193	1.1265294354205	0.927	0.678	4.58778905803182e-189
MT-CO2	1.77792154638208e-190	0.394752109143653	1	0.998	4.2730566445747e-186
TP53I11	1.42713786879115e-174	0.576141452546829	0.593	0.114	3.42998315385265e-170
COL5A1	5.00714426163359e-174	-0.704055852428009	0.09	0.472	1.20341705184102e-169
MYCNUT	5.47023069409581e-171	0.683555402002687	0.783	0.402	1.31471524501899e-166
RALBP1	5.43314331428413e-170	0.592859835943977	0.966	0.847	1.30580166415505e-165
MT-CYB	3.4618553394002e-164	0.4709791230122	0.998	0.997	8.32022312271444e-160
ISG15	8.28536581836958e-163	-0.75987876421874	0.841	0.964	1.99130482078695e-158
ISM2	2.39051139732263e-160	0.487445800666325	1	0.994	5.7453550923252e-156
MT-ND2	1.56786725024891e-159	0.472355149127208	0.999	0.994	3.76821214924824e-155
TXN	1.58382549946452e-158	-0.533525748044977	0.935	0.973	3.80656620541303e-154
PAEP	1.55697719843842e-151	-0.409264436580319	0.026	0.322	3.74203899872689e-147
DNASE1L3	7.20020295411723e-151	0.962060033441345	0.607	0.157	1.73049677799254e-146
FKBP10	7.28843297900468e-145	0.856634281770671	0.589	0.164	1.75170198217399e-140
SERF2	1.13010075243151e-144	0.338732232947167	0.998	0.991	2.71608414839389e-140
CKAP4	6.05137490018983e-142	0.560290873831253	0.966	0.857	1.45438744351162e-137
MALAT1	9.10341931309986e-141	-0.450150493453381	0.999	0.999	2.18791579771042e-136
ANXA1	5.75825841572344e-139	-0.518695385817331	0.964	0.991	1.38393982763497e-134
MT-ATP6	3.0441182381677e-138	0.386675826250299	1	0.998	7.31623377361225e-134
IFI6	9.97106055460595e-138	-0.572953507120166	0.902	0.996	2.39644469369399e-133
PTPRF	1.29005911171849e-134	0.522213632083851	0.996	0.984	3.10052806910421e-130
S100A11	5.62724707763602e-132	-0.369192579418554	0.996	0.999	1.35245256263904e-127
ENG	5.68601190776319e-132	0.475147756733445	0.979	0.898	1.3665761019118e-127
COTL1	5.40020652906053e-130	0.368549801218131	0.993	0.97	1.29788563719441e-125
PTN	8.4390078225692e-128	0.470721945662333	0.974	0.842	2.02823114007628e-123
RCN3	4.22149793777531e-126	0.513704584189012	0.545	0.133	1.01459481436492e-121
MT-ND4	5.86012658386108e-124	0.282871883521389	0.999	0.998	1.40842282316517e-119
ACVRL1	2.38507897430041e-123	0.579305905444839	0.66	0.25	5.73229880683362e-119
KRT19	1.21799388964546e-120	-0.367737313642402	1	0.999	2.9273265143739e-116
PSG5	1.27404782202919e-119	-0.657194821879895	0.268	0.626	3.06204653546495e-115
UBC	7.76452103399884e-118	-0.382538926606676	0.983	0.996	1.86612498531128e-113
PAPPA2	2.08590691428423e-112	0.444113028821386	0.998	0.959	5.01326867779072e-108
HPGD	1.90866424405924e-110	-0.424336911848031	0.999	0.999	4.58728364417198e-106
BACE2	3.62840368478199e-110	0.462352373376147	0.67	0.308	8.72050541600503e-106
KRT18	1.4996858566088e-109	-0.452816122365134	0.999	0.998	3.6043449877736e-105
PLPP2	1.00796107601451e-108	0.458646526029967	0.519	0.139	2.42253365009327e-104
FBLN1	6.06062271026067e-108	0.330063441098455	1	0.985	1.45661006218405e-103
TIMP2	5.05383617106393e-104	0.386173908752047	0.999	0.994	1.2146389853535e-99
CRABP2	2.6107450671317e-103	0.581327579741218	0.541	0.168	6.27466469434433e-99
SHISA5	7.70406085243481e-102	0.463469292410607	0.905	0.768	1.85159398527418e-97
MT-ND3	1.29448261813499e-101	0.404867433393438	0.999	0.997	3.11115952442563e-97
TMEM91	2.11499208063952e-101	0.478255604054268	0.717	0.39	5.08317196660903e-97
MT-ND4L	1.85991572109665e-100	0.38215046151292	0.996	0.983	4.47012144408369e-96
TGFB1	3.01208302486858e-100	0.444894273778067	0.808	0.49	7.23924034196914e-96
ACSL3	8.65086366255824e-99	-0.475738408285992	0.314	0.622	2.07914857265925e-94
LGALS3	1.08311829754725e-98	-0.491706235989914	0.987	0.987	2.60316651632505e-94
GM2A	8.57344076016651e-97	0.425497072487691	0.896	0.742	2.06054075229842e-92
PLSCR1	4.89809330304583e-96	-0.456207362541688	0.47	0.741	1.17720774445404e-91
TUBA1C	1.1264670543126e-94	-0.446929762548774	0.856	0.94	2.70735091833491e-90
ACTB	2.98080697478898e-94	-0.362963688656325	0.999	0.999	7.16407148320783e-90
NUPR1	3.73358809517132e-94	-0.427414876902127	0.051	0.283	8.97330562793475e-90
LY6E	6.29139997622783e-94	-0.506170321265728	0.77	0.935	1.5120750702866e-89
PAPPA	1.42076697863415e-93	0.478887464388142	0.971	0.762	3.41467135644931e-89
MT-ND1	1.93049264476153e-93	0.278437760758814	0.999	0.995	4.63974602241987e-89
SKP1	1.19404195652731e-92	-0.334972338837176	0.951	0.98	2.86976043831773e-88
UPK1B	1.02539118818091e-91	-0.838639254614354	0.496	0.72	2.46442518167399e-87
EPSTI1	3.43935030394704e-91	-0.43504226465936	0.351	0.647	8.26613452050631e-87
RNASET2	5.98867891823872e-90	0.477109733877649	0.659	0.345	1.43931909120949e-85
BZW2	4.33257736215266e-89	-0.328951979177418	0.986	0.99	1.04129164321977e-84
SLC30A2	5.63191389897098e-89	0.489157295760837	0.536	0.194	1.35357418647869e-84
BZW1	1.16384869859159e-88	-0.401699381139122	0.795	0.906	2.79719396219502e-84
KRT14	2.14474174892423e-87	-0.673853697162711	0.2	0.475	5.1546723193645e-83
TNNT3	1.04617495716795e-86	-0.31548021298311	0.008	0.171	2.51437689205746e-82
TAGLN2	1.29005732223695e-86	-0.346501980287592	0.969	0.976	3.10052376826429e-82
FHOD3	4.76317603749215e-85	0.342434041791561	0.403	0.097	1.14478172885086e-80
TAC3	5.36775195265821e-85	0.688215367476729	0.65	0.299	1.29008550430187e-80
FOLR1	2.92245970034223e-84	-0.45904658363578	0.35	0.654	7.02383964380252e-80
ENO1	1.30098873057061e-83	-0.343559692232291	0.946	0.968	3.1267963150534e-79
IGFBP3	2.52758653190858e-83	-0.696333554328467	0.503	0.796	6.07480147078908e-79
LY6K	2.74241635217276e-83	0.447481384726849	0.753	0.478	6.59112346081201e-79
CCNE1	3.04913175999025e-83	0.432852466579076	0.9	0.688	7.32828327196057e-79
S100A16	3.55563014856477e-81	-0.286779585509458	0.04	0.24	8.54560149906058e-77
HES1	8.48460711650517e-81	-0.988759813800056	0.142	0.393	2.03919047438085e-76
LDHA	1.16674240666954e-80	-0.498702686571198	0.732	0.861	2.80414870018958e-76
SELENOW	6.38798845913878e-80	0.397161200750203	0.903	0.678	1.53528914626941e-75
TMED3	2.09575769242926e-79	0.395737513097584	0.971	0.898	5.03694403798448e-75
PDIA5	8.58008962215344e-79	0.458295319033079	0.911	0.788	2.06213873978836e-74
LVRN	1.35335506160907e-78	0.442018870991157	0.95	0.763	3.25265355507124e-74
VWCE	2.31495059778523e-78	0.389848886031102	0.674	0.391	5.56375226671702e-74
SOD3	1.04209005051273e-75	-0.44597873270857	0.804	0.939	2.5045592274023e-71
C12orf75	1.39200009659856e-75	-0.327184401077149	0.966	0.979	3.34553303216497e-71
MYCN	9.26456287068076e-75	0.349136539255952	0.553	0.258	2.22664504033941e-70
C1QTNF1	4.52446090146804e-74	0.319008558823056	0.449	0.159	1.08740893305883e-69
MYL12B	7.34672899807304e-74	-0.31487212881188	0.934	0.961	1.76571284739687e-69
MAGED1	3.48592057535572e-73	0.328918889660983	0.957	0.877	8.37806151080993e-69
ADAM12	6.27946682750918e-73	0.33805352388854	0.994	0.962	1.50920705732356e-68
EVL	1.40098302550106e-72	0.360592043484606	0.684	0.418	3.36712260348924e-68
AOC1	1.5639194188307e-72	0.470731376832846	0.975	0.718	3.7587239312177e-68
TIMP3	5.2249860749825e-72	0.317577488092153	1	1	1.2557731532613e-67
DUSP4	7.95609525198318e-72	0.394485419729128	0.507	0.213	1.91216793286164e-67
UBE2L6	1.82206872125848e-70	-0.38701476762953	0.262	0.527	4.37915996467263e-66
LAMA3	2.89574581093047e-70	-0.539862204450685	0.294	0.558	6.9596354819903e-66
S100P	1.66426313665186e-69	-0.296166027007499	0.986	0.993	3.99989002262909e-65
EPAS1	3.70148402924279e-68	0.256498467676079	0.999	0.996	8.89614671588213e-64
TTR	1.91083546778978e-67	0.583998630627175	0.338	0.086	4.59250196328596e-63
MMP11	3.82228221847894e-67	0.481498992701671	0.917	0.76	9.18647308389228e-63
CLDN4	5.0425427109207e-67	-0.380299791221286	0.834	0.919	1.21192471514268e-62
FILNC1	1.79569676751908e-66	0.701530931672453	0.393	0.134	4.31577761105535e-62
ZFP36L1	2.06104755093895e-66	0.324073715782641	0.988	0.96	4.95352168392667e-62
ERGIC3	6.87880976509041e-66	0.329335539063041	0.965	0.887	1.65325313894183e-61
CPM	2.76640486959773e-65	0.328404870263977	0.97	0.877	6.64877746359119e-61
S100A10	3.49246870553308e-65	-0.427348958360413	0.939	0.946	8.39379928687821e-61
CHPF	4.79951425396865e-65	0.332566641458232	0.944	0.862	1.15351525579883e-60
MAG	5.64060691435735e-65	0.322245398260966	0.474	0.203	1.35566346579664e-60
KRT17	4.68418021669384e-64	-0.453391532362551	0.109	0.326	1.1257958732802e-59
HAPLN3	1.02932952073514e-62	0.369556150952967	0.414	0.142	2.47389057013483e-58
EGLN3	2.63434804266972e-62	-0.428828095242889	0.694	0.858	6.3313920857524e-58
C4orf48	6.71485270411807e-62	0.281552429335187	0.321	0.078	1.61384769890774e-57
FABP7	8.12083594077478e-62	-0.592154459348717	0.068	0.252	1.95176171000581e-57
LAPTM4A	3.79137746954992e-61	-0.265112148304953	0.975	0.974	9.11219661031627e-57
PEA15	5.78031963104452e-61	0.353199988831735	0.811	0.63	1.38924202012524e-56
RPS29	2.67517174265861e-60	-0.280225540398034	0.994	0.986	6.4295077663057e-56
SOCS3	3.41019353922829e-60	-0.475326813283738	0.545	0.742	8.19605915218127e-56
APOBR	5.39825192150851e-60	0.265544410848896	0.366	0.107	1.29741586681535e-55
TNFSF10	1.46059983159395e-59	-0.501407303941524	0.951	0.981	3.51040563525289e-55
BMP1	1.04209794940048e-58	0.312612679333387	0.609	0.355	2.50457821158912e-54
ITGA5	1.27346886371252e-58	-0.307389769006287	0.961	0.982	3.06065506704667e-54
IFIT1	3.02752490110643e-58	-0.325399841196031	0.082	0.277	7.27635334731919e-54
ZFP36	1.73795653160777e-57	-0.49582161271364	0.421	0.626	4.17700472806612e-53
HERC1	3.23759750974284e-57	0.39750258105542	0.771	0.617	7.78124185491594e-53
EGFR-AS1	3.26886292818905e-57	0.435096566273321	0.747	0.482	7.85638516160957e-53
SCARA3	1.01000821238495e-56	0.349577878156047	0.627	0.371	2.42745373764598e-52
REL	4.17987175250398e-56	0.337760000159536	0.668	0.442	1.00459037699681e-51
CARHSP1	4.44980127236757e-56	-0.402944575242905	0.538	0.698	1.06946523780082e-51
TSPO	4.70904004450128e-56	0.33069972100438	0.898	0.693	1.13177068429544e-51
CLSTN2	5.36938148516679e-56	0.256046452697507	0.233	0.03	1.29047714614499e-51
EEF2	8.19906492804855e-56	0.280544619519665	0.986	0.984	1.97056326480719e-51
ASS1	1.43338878827159e-55	0.255934753039263	0.264	0.052	3.44500661373194e-51
PGK1	3.01828113646914e-55	-0.317577009576156	0.687	0.811	7.25413688338992e-51
JPT1	2.93142230573165e-54	-0.302397396973831	0.989	0.99	7.04538036959545e-50
TAPBP	6.73343996257954e-53	0.285552966924786	0.942	0.887	1.61831496060637e-48
UGP2	1.65692870572926e-52	-0.331100986986118	0.889	0.945	3.98226245134971e-48
GPRC5A	5.87580980516442e-52	-0.427632529562798	0.39	0.595	1.41219212857322e-47
ARPC3	6.01985216534154e-52	-0.254895893783399	0.903	0.942	1.44681126941819e-47
RASL11B	1.9952163716405e-51	0.281647051039188	0.37	0.133	4.79530302760078e-47
TNFAIP8	2.82801902301993e-51	-0.33005705121715	0.6	0.754	6.79686091992609e-47
FOS	2.92789110019092e-51	-0.27109758727549	1	1	7.03689347019887e-47
TTC3	4.95965070746247e-51	0.259435990583478	0.953	0.898	1.19200245103153e-46
NECTIN2	5.36432000882709e-51	-0.275919827821083	0.302	0.539	1.2892606709215e-46
CD59	1.18613660693395e-50	-0.296802750751636	0.875	0.914	2.85076072110505e-46
TUBB6	1.77491069448174e-50	-0.352028327912412	0.648	0.789	4.26582036311741e-46
PPDPF	3.68144619966138e-50	-0.346392645467325	0.142	0.34	8.84798779626617e-46
TCIM	6.81301315249107e-50	-0.535488714598017	0.382	0.589	1.6374395810697e-45
CD9	1.49891173953408e-49	-0.278902471156139	0.972	0.974	3.60248447479621e-45
TNFAIP3	1.73769171604546e-49	0.319988668126941	0.826	0.648	4.17636827034365e-45
TPI1	3.84861256174149e-49	-0.284680770574228	0.852	0.898	9.2497554308895e-45
CYR61	4.1507894114886e-49	-0.460931005998062	0.836	0.889	9.97600727157169e-45
PLAC4	8.70127876879574e-49	0.274564831633146	0.242	0.048	2.09126533929237e-44
PTGDS	8.72217691202718e-49	-0.598182630392472	0.047	0.198	2.09628799903661e-44
SMAD3	9.0836380521786e-49	0.31102979429061	0.719	0.537	2.18316156946061e-44
PARVA	1.40614183689653e-48	0.300790824692118	0.818	0.681	3.37952129079712e-44
SERPING1	1.71854209959956e-48	-0.305195819837714	0.828	0.911	4.13034408217757e-44
TUBB4B	1.87675122067058e-48	-0.385421193184192	0.62	0.762	4.51058388375967e-44
YIPF2	4.48860686246337e-48	0.281110486319737	0.921	0.814	1.07879177332445e-43
FOSB	6.24388384679368e-48	0.261981043800142	0.979	0.935	1.50065504373839e-43
TUBA1B	1.20414595972485e-47	-0.303626706739812	0.855	0.922	2.8940443996027e-43
GADD45B	1.39547631336204e-47	-0.479791565695122	0.45	0.626	3.35388777153433e-43
SLC38A10	2.05910479494627e-47	0.296285212567156	0.748	0.553	4.94885246417387e-43
DYNLT1	2.37117595826601e-47	-0.301265727654162	0.773	0.856	5.69888429809653e-43
KRT7	2.8551237390807e-47	-0.251592521749817	0.996	0.998	6.86200439450654e-43
CD320	1.68099538305982e-46	0.2706027621851	0.395	0.173	4.04010430364597e-42
MFSD2A	6.93084258914566e-46	0.348530266610364	0.798	0.602	1.66575870787527e-41
XAF1	7.01040317605948e-46	-0.276877753177442	0.123	0.309	1.68488029933413e-41
HMGB3	8.29481799514519e-46	-0.333084651272999	0.984	0.986	1.9935765569532e-41
DDIT4	2.6066411222136e-44	-0.33501309779862	0.089	0.257	6.26480127312817e-40
ETS2	5.10025611878359e-44	-0.409814496761163	0.387	0.569	1.22579555558845e-39
DDX60L	8.17937074503704e-44	-0.345222147387769	0.618	0.768	1.9658299648622e-39
MYL12A	8.93661522784904e-44	-0.262574452794182	0.812	0.897	2.14782610386124e-39
CNPY2	1.30131521255602e-43	0.295387580555239	0.938	0.858	3.12758098185713e-39
SEPT7	1.55757853548196e-43	-0.279705136205674	0.597	0.748	3.74348425217735e-39
FYB1	2.51644962281452e-43	0.284963009043277	0.572	0.356	6.04803502347241e-39
NT5E	4.28911655126474e-43	-0.258478341231197	0.224	0.43	1.03084627193097e-38
FUCA2	5.34217679436063e-43	0.277250411401764	0.881	0.729	1.28393877075663e-38
CHIC2	1.04097433124537e-42	-0.276468983081935	0.501	0.666	2.50187770771513e-38
SCIN	1.12145563065278e-42	0.253705218901547	0.286	0.094	2.6953064627109e-38
TFPI2	1.96373548438136e-42	0.281361831562081	0.343	0.136	4.71964186316217e-38
FAM3C	2.86915214352783e-42	-0.254689963957385	0.926	0.942	6.89572026175478e-38
SAMD9	4.21688649936833e-42	-0.264074040081589	0.236	0.436	1.01348650125818e-37
COL17A1	5.41846806149688e-42	-0.364485362812629	0.782	0.875	1.30227461390016e-37
ASPSCR1	9.40666550085509e-42	0.594082239944455	0.921	0.861	2.26079798647551e-37
TRAM1	1.05498214566115e-41	-0.260428444550536	0.717	0.837	2.53554408888201e-37
MBNL3	1.37968953970656e-41	0.257776856177156	0.329	0.129	3.31594583973075e-37
SLC2A1	1.76981317101639e-41	-0.423292222012078	0.702	0.802	4.25356897522079e-37
SLC23A2	1.8873195782008e-41	0.29048330330268	0.634	0.456	4.5359838742478e-37
RGS16	1.90027590506768e-41	-0.332492939752889	0.316	0.508	4.56712311023965e-37
NOG	3.40275304958457e-41	-0.430385422589691	0.693	0.794	8.17817667937157e-37
CAV2	6.28194145848379e-41	-0.262144930847706	0.668	0.799	1.50980181013199e-36
SLC39A6	6.31790416855642e-41	0.269165716871407	0.796	0.647	1.51844508787085e-36
CREB5	1.34330629926613e-40	0.359042521013473	0.703	0.537	3.22850235965623e-36
CSRP2	1.84243718552432e-40	-0.341712462879869	0.629	0.75	4.42811353168915e-36
KDELR3	1.90005084818816e-40	0.258631369076224	0.804	0.641	4.56658220853543e-36
LYN	2.8446047269659e-40	0.273840630317083	0.712	0.533	6.83672300078985e-36
GALM	2.8892410251688e-40	0.271147189642798	0.569	0.365	6.9440018798907e-36
H3F3B	4.07547502037624e-40	-0.261374173094846	0.95	0.953	9.79499666397226e-36
CPED1	9.31629876524525e-40	0.262470783896672	0.583	0.377	2.23907924523904e-35
IFIT3	1.10640976879523e-39	-0.287824605711532	0.15	0.329	2.65914523832246e-35
B4GALT1	1.40633997386684e-39	0.265777041692071	0.808	0.679	3.37999749319156e-35
ATP5F1C	5.19042885185961e-39	-0.259718447695141	0.662	0.787	1.24746767025594e-34
MYCL	1.58840237788922e-38	0.28543397460571	0.484	0.288	3.81756627501894e-34
HSPB1	1.98106786097137e-38	0.262987124304167	0.954	0.878	4.7612984970586e-34
XAGE3	3.88440313090413e-38	-0.411614237125801	0.602	0.733	9.33577448481499e-34
NTN4	4.49675140944031e-38	0.268165412957667	0.695	0.484	1.08074923374488e-33
CMIP	8.64566809693904e-38	0.255261496294849	0.807	0.673	2.07789987041833e-33
ARPC5	1.02111839087904e-37	-0.262018529385451	0.747	0.838	2.4541559406387e-33
GLO1	1.09146203552327e-37	-0.269045075020804	0.531	0.694	2.62321985617662e-33
GLIPR1	2.58785024212944e-37	0.258603182600743	0.96	0.902	6.2196392719339e-33
ECH1	4.0667712383426e-37	-0.272825115400727	0.602	0.741	9.77407799423259e-33
HIST1H4C	5.34987113317792e-37	-0.334548562501796	0.709	0.792	1.28578802814798e-32
CPVL	2.36834450512009e-36	-0.274533506135157	0.624	0.786	5.69207918360563e-32
YPEL5	2.67642509514287e-36	0.257640375689338	0.828	0.727	6.43252007366638e-32
SERPINE2	3.4395822210639e-36	0.35738038485353	0.999	0.978	8.26669191010499e-32
MT2A	6.35972907899439e-36	-1.31988529706682	0.128	0.288	1.52849728684551e-31
DLK2	6.83043068517036e-36	0.269447083436412	0.325	0.143	1.64162571087384e-31
HIP1	1.07268224138633e-35	0.25215377980683	0.582	0.38	2.57808449894789e-31
STAB2	1.65048570401666e-35	0.311652333961607	0.355	0.169	3.96677734103365e-31
CTSZ	1.9159423514241e-35	0.251734306650562	0.899	0.777	4.60477584741268e-31
CST3	1.94825945319955e-35	0.259445244152247	0.659	0.459	4.68244676981979e-31
GATA2	8.4766992920176e-35	0.278582197363014	0.905	0.826	2.03728990784351e-30
NAV2	1.73223082229901e-34	0.273449139871157	0.693	0.514	4.16324355831343e-30
ZNF704	3.50513114578276e-34	0.286114787019683	0.861	0.737	8.42423219577428e-30
ARRDC3	4.29845596538318e-34	-0.326899217021703	0.209	0.376	1.03309090672019e-29
RRAD	4.42132369181773e-34	-0.623552692688283	0.783	0.829	1.06262093609147e-29
ADM	5.08251599608992e-34	-0.2769393942295	0.976	0.974	1.22153189450025e-29
SRI	1.17436285917126e-33	-0.301904924934717	0.569	0.723	2.8224636957322e-29
SNHG25	4.71105253099481e-33	0.318682722980965	0.376	0.201	1.13225436529929e-28
MSMO1	5.80092222617426e-33	-0.27900407041714	0.169	0.326	1.39419364783872e-28
UXS1	4.10197601123309e-32	0.28318282707911	0.799	0.662	9.85868914539761e-28
RFK	1.48769840683049e-31	-0.284975372075188	0.499	0.648	3.57553435097639e-27
MX1	2.13229082967123e-31	-0.318516189769913	0.206	0.366	5.12474778003184e-27
HUNK	3.99174841867931e-31	0.270465991850364	0.625	0.442	9.59376814945386e-27
PLCL2	1.26178008947693e-30	0.25735270333562	0.743	0.605	3.03256226704886e-26
INSIG1	1.29324287408756e-30	0.251656475000636	0.693	0.543	3.10817992358205e-26
PSME2	1.36067768919646e-30	-0.254758406728231	0.504	0.646	3.27025275821478e-26
PDGFRL	3.1772199270523e-30	0.257739983537776	0.667	0.471	7.63613037267749e-26
GUCA2A	3.25892559560673e-30	0.300591706080348	0.313	0.146	7.83250177648121e-26
KRT23	3.90252768088474e-30	0.290840022833076	0.555	0.398	9.37933502823838e-26
LINC01602	1.01878000050793e-29	0.265097320534366	0.582	0.398	2.44853585322075e-25
MT-ATP8	1.14505666114025e-29	0.265133161466949	0.802	0.672	2.75202917938448e-25
EIF2AK2	5.88981132879336e-29	-0.252459247275207	0.669	0.76	1.4155572547622e-24
RND3	1.87747059645572e-28	-0.30568363450462	0.421	0.586	4.51231283152167e-24
RBBP6	5.36485777498749e-28	0.277428024007488	0.584	0.433	1.28938991764049e-23
KCNJ2	6.32471695905952e-28	-0.256355533816781	0.185	0.339	1.52008247394037e-23
NDRG1	6.40757834127732e-28	-0.348689558078608	0.509	0.629	1.53999737854259e-23
SCD	5.99590747352842e-27	-0.386621330410683	0.227	0.358	1.44105640218782e-22
PAGE4	2.17060711347764e-26	0.379112804052808	0.188	0.06	5.21683713653216e-22
LIFR	2.99014164231975e-26	0.252051515438177	0.573	0.4	7.1865064231513e-22
PLOD2	4.39399961279555e-26	-0.309163294582504	0.595	0.72	1.05605386693928e-21
MTRNR2L12	2.06978599761604e-25	-0.278101709963674	0.808	0.846	4.97452366667039e-21
CST6	7.40172973845859e-25	-0.461583070057879	0.528	0.623	1.77893172534114e-20
PTMS	1.03936566347087e-24	-0.258936457220137	0.466	0.59	2.49801143558588e-20
HSPA5	1.48648229883412e-24	-0.282299065230358	0.938	0.94	3.57261155701793e-20
COL4A1	2.12641214311148e-24	-0.267343968287121	0.942	0.955	5.11061894475413e-20
BGN	1.30965525196661e-23	0.297204210078733	0.925	0.871	3.14762543257654e-19
HSPA1A	1.61359493924046e-23	-0.62954288563178	0.343	0.47	3.87811407697052e-19
ANTXR1	1.61755406542579e-23	0.429455778907897	0.505	0.372	3.88762944084435e-19
SFRP1	2.25385792204919e-23	-0.339333881906355	0.632	0.73	5.41692212985302e-19
CD99	3.06180995928627e-23	-0.276741155968647	0.586	0.686	7.35875405614862e-19
MT1E	5.0114124192449e-23	-0.375137529770953	0.188	0.32	1.20444286084132e-18
PEG10	1.97601101300308e-22	0.634351312258172	0.211	0.084	4.74914486865161e-18
IL1R2	1.28133720376558e-21	-0.308090276784177	0.669	0.71	3.07956583553019e-17
SLC12A8	3.08201181974264e-21	0.261171905470638	0.524	0.37	7.40730720756946e-17
CEP128	4.86251622417127e-21	0.265331722765461	0.214	0.094	1.16865714931732e-16
HSP90AA1	1.2719671596577e-19	-0.282555099067832	0.976	0.984	3.05704587152132e-15
LAIR2	2.679724122596e-19	-0.373126196582382	0.284	0.413	6.44044895624723e-15
LEP	4.46354556121411e-18	0.569166998522595	0.141	0.049	1.0727685401822e-13
FGFBP1	2.07103844475311e-17	-0.712096470726079	0.219	0.331	4.97753379811961e-13
CAV1	2.27445373436775e-17	-0.261203259343451	0.783	0.818	5.46642210517945e-13
ADAMTS1	2.30652320384387e-16	-0.275880857908666	0.794	0.822	5.54349786811835e-12
CLIC3	3.83592297056925e-15	-0.372580906596907	0.926	0.918	9.21925726746614e-11
SYT8	3.82052577234563e-14	0.258131659749843	0.733	0.683	9.18225164125549e-10
INTS6	5.44473748070908e-13	-0.274483065976983	0.475	0.553	1.30858820611362e-08
MME	6.58887479881606e-11	-0.303081918010308	0.17	0.247	1.58357016914745e-06
LY6D	1.07729731507842e-08	0.39060262041381	0.389	0.338	0.000258917636705947
JUN	4.03536658799045e-08	-0.429336858458998	0.488	0.53	0.000969860005757626
HMOX1	1.5705919077842e-06	-0.535883011923363	0.383	0.424	0.0377476059116855
