# Supplementary material for: Regionally distinct trophoblast regulate barrier function and invasion in the human placenta
Source: eLife. 2022 Jul 7;11:e78829. doi: 10.7554/eLife.78829 (PMC9323019; doi:10.7554/eLife.78829)
Supplement: Figure 5—source data 4. [file elife-78829-fig5-data4.csv]

	p_val	avg_logFC	pct.1	pct.2	p_val_adj
CDA	3.08384168401266e-202	-1.19427279550086	0.343	0.928	7.41170510335603e-198
MT-CO2	4.24964430809616e-159	0.528887378376819	1	1	1.02135951300783e-154
ITM2C	1.54106433560009e-157	0.981302052869719	0.883	0.464	3.70379402418126e-153
ANXA2	1.19100973533273e-152	-0.633624785068057	0.999	0.999	2.86247279789867e-148
LGALS3	1.7130893022934e-144	-0.840508708441503	0.981	0.998	4.11723882913196e-140
MT-CYB	1.27635712786475e-140	0.599177559335532	1	1	3.06759672111014e-136
UPK1B	3.01412763713324e-136	-1.15065644279629	0.539	0.897	7.24415436308602e-132
KRT8	8.06426662513479e-132	-0.535718707494639	1	1	1.93816584068489e-127
CSH1	3.17244413478152e-130	2.40291163777828	0.679	0.145	7.62465223353389e-126
S100A10	5.9659659732827e-127	-0.750858614177334	0.915	0.988	1.43386026201876e-122
MT-ND3	6.6735147401612e-124	0.654544078448402	1	1	1.60391253265034e-119
MT-ND1	1.66964628933977e-123	0.520584520339566	1	1	4.0128278917992e-119
MT-ATP6	1.86225058088903e-120	0.526030751541781	1	1	4.47573304610869e-116
MT-ND2	2.16729563989434e-120	0.558897066436834	0.998	0.999	5.20887834092205e-116
TP53I11	1.44270577340919e-119	0.595090536541471	0.614	0.098	3.46739905581164e-115
TXN	4.15113197331535e-109	-0.541893463782453	0.957	0.991	9.97683058466611e-105
ANXA1	6.90052477527259e-106	-0.580241254215843	0.981	1	1.65847212448901e-101
PTPRF	1.63029916675134e-105	0.693548021367043	0.99	0.988	3.91826101737017e-101
HTRA4	1.23327227694412e-102	0.961698309685896	0.937	0.732	2.9640465904075e-98
FBLN1	3.37188846176824e-102	0.451463797958493	0.997	0.991	8.1039967290138e-98
ACSL3	2.26722249520099e-98	-0.649977147697953	0.469	0.843	5.44904254496607e-94
BACE2	1.38480478059911e-96	0.587650942706396	0.776	0.373	3.3282398096919e-92
MFAP5	1.57661289682531e-95	-0.382727437134038	1	0.999	3.78923143622996e-91
EGLN3	4.41997037824679e-95	-0.702748366857135	0.625	0.92	1.06229568070783e-90
LDHA	1.12081451756822e-94	-0.732785812480247	0.828	0.964	2.69376561152345e-90
MT-ND4	5.33022799377779e-93	0.383502265777958	1	1	1.28106699602456e-88
MYCNUT	1.30895419003699e-91	0.661593445884349	0.642	0.252	3.1459405003349e-87
FKBP10	1.82330476935515e-91	0.761829659379244	0.687	0.26	4.38213068266818e-87
MISP	1.87048545743816e-90	-0.408882121827306	0.096	0.499	4.49552474840687e-86
PAEP	2.42664556648587e-89	-0.292123306497652	0.021	0.349	5.83219995449215e-85
RALBP1	7.12785249891232e-86	0.522576305681596	0.972	0.931	1.71310806958859e-81
TUBB6	1.10749596521668e-84	-0.551841863856623	0.768	0.935	2.66175580280176e-80
HEXB	1.86142331861336e-84	-0.545506570980271	0.993	0.998	4.47374480395535e-80
MT-ND4L	5.32629176396537e-82	0.475959408284967	0.996	0.989	1.28012096255144e-77
MT-CO3	7.08358858125651e-81	0.41612833600143	1	0.999	1.70246967961919e-76
FOLR1	2.19062314155209e-80	-0.514589892338134	0.592	0.93	5.26494365840628e-76
IFITM3	2.8139275632395e-80	-0.591850032890705	0.836	0.98	6.7629935054898e-76
IFI6	2.16198275962959e-77	-0.510923793846649	0.962	0.999	5.19610936449376e-73
S100A16	8.92972140521525e-77	-0.406482391317414	0.059	0.389	2.14616924252943e-72
TUBA1C	1.30429558200719e-76	-0.498393966673988	0.833	0.969	3.13474400179608e-72
MT-CO1	1.40367021581937e-76	0.355519468400328	1	1	3.37358099670026e-72
PEA15	2.88470427328538e-76	0.54431363020814	0.864	0.731	6.93309825041408e-72
KRT18	1.82702503394197e-75	-0.49624505126718	1	1	4.39107196657612e-71
ISG15	8.45421280054655e-75	-0.576180611165043	0.907	0.991	2.03188550448336e-70
COTL1	1.62129390106894e-73	0.389001599608235	0.993	0.988	3.89661776182909e-69
ADAM12	4.83057353036524e-72	0.530763928492254	0.98	0.955	1.16098004228798e-67
PAPPA2	5.37159500935546e-72	0.617359687213618	0.973	0.948	1.29100914454849e-67
CCNE1	5.00007000224358e-69	0.763275972004392	0.72	0.439	1.20171682433922e-64
LAMB3	6.24390949132849e-69	-0.361914196688439	0.071	0.394	1.50066120714589e-64
EPAS1	2.14165665784867e-68	0.447958260852941	0.996	0.994	5.1472576114735e-64
PLPP2	7.60379611404706e-68	0.459324989674174	0.555	0.176	1.82749635805007e-63
UBC	8.39226894185413e-68	-0.360534645257431	0.988	0.998	2.01699791748522e-63
S100A11	1.59166646612215e-66	-0.324383870397716	0.997	1	3.82541118467796e-62
LY6E	7.02280069964316e-65	-0.541062524835043	0.803	0.971	1.68785992015224e-60
EBI3	1.36414073746042e-64	-0.392735810480777	0.991	0.994	3.27857584841236e-60
RPS29	3.75633718033314e-64	-0.308748536819049	0.997	0.996	9.02798077921267e-60
TUBA1B	5.23727432172284e-61	-0.449211725022051	0.835	0.947	1.25872651048287e-56
ENO1	7.73450653760477e-61	-0.356772307378117	0.95	0.996	1.85891130124793e-56
IL1R2	7.64223476843564e-60	-0.443534837552118	0.765	0.926	1.83673470424582e-55
PLSCR1	8.56419878476261e-60	-0.412376947744572	0.518	0.806	2.05831953592984e-55
PLPP3	1.92322865309123e-59	0.630800674379644	0.786	0.57	4.62228774483947e-55
JAM2	3.74344346148289e-59	-0.432693107434779	0.909	0.963	8.99699201532798e-55
PSG5	6.9450832210948e-59	-0.411101962881962	0.579	0.904	1.66918130135793e-54
CD9	8.73567081108484e-59	-0.397821029631437	0.971	0.993	2.09953112273613e-54
PGK1	1.53025186505843e-58	-0.388700544009644	0.703	0.915	3.67780733248142e-54
MSMO1	3.31755415439363e-58	-0.535909438129851	0.241	0.572	7.97340965466966e-54
CTSL	1.2080718611486e-57	0.465445094356836	0.998	0.977	2.90347991108455e-53
TPI1	1.78115450175949e-56	-0.371188665211204	0.863	0.963	4.28082672952875e-52
ACTB	4.14234233118167e-56	-0.366350490601026	0.998	1	9.95570555876203e-52
ACVRL1	5.15178274403092e-56	0.509049147235445	0.644	0.296	1.23817946470039e-51
CAV1	1.40442768820237e-55	-0.534687039439734	0.82	0.943	3.37540150582557e-51
HIST1H4C	1.53889632789281e-55	-0.497519994935852	0.64	0.865	3.69858343445757e-51
SKP1	2.32940297125985e-55	-0.291073509407247	0.975	0.993	5.59848710112593e-51
SCD	3.48687300572771e-55	-0.668061448728141	0.327	0.618	8.38035058196599e-51
SOX4	4.42267127749887e-55	0.477125346201359	0.913	0.826	1.06294481483408e-50
ITM2B	6.0759729581964e-55	-0.446422242692403	1	1	1.46029934077292e-50
TAPBP	1.13627520025436e-53	0.388314331644888	0.944	0.909	2.73092381629133e-49
INHA	1.48906496854975e-53	-0.419727994034145	0.669	0.892	3.57881874541247e-49
GPRC5A	5.05055789308823e-53	-0.421323029835249	0.721	0.918	1.21385108402483e-48
KRT19	9.0859951838332e-53	-0.295529120040874	0.999	0.999	2.18372808248247e-48
UGCG	9.12566475846607e-53	-0.398994385531879	0.483	0.77	2.19326226804973e-48
LTBP1	4.73072316583441e-52	0.395757207516503	0.976	0.974	1.13698200567664e-47
BGN	1.21599178504235e-51	0.629327359250212	0.908	0.81	2.92251465617078e-47
CRABP2	6.86311085088216e-51	0.517557396084025	0.689	0.334	1.64948006190102e-46
RND3	1.04458156595419e-49	-0.495711116627877	0.482	0.769	2.5105473356143e-45
C12orf75	2.62958633404356e-49	-0.327103088065461	0.95	0.99	6.31994779524029e-45
ZFP36	2.91487982636372e-49	-0.526757613785446	0.492	0.726	7.00562217468256e-45
TPM1	3.73954643335328e-49	-0.296231357899509	0.993	1	8.98762589792127e-45
CAV2	3.75846913584076e-49	-0.340320511511882	0.771	0.92	9.03310472107969e-45
ACAT2	6.09048942018688e-49	-0.345530393782708	0.141	0.424	1.46378822724771e-44
LAMA3	1.73240092297853e-48	-0.397250781446507	0.669	0.924	4.1636523782866e-44
SELENOW	2.0964199840112e-48	0.422476344012476	0.902	0.752	5.03853578957252e-44
HTRA1	4.42508119230805e-48	0.393179756122363	0.997	0.996	1.06352401375932e-43
PLAC4	3.57999432072151e-47	0.368353624416211	0.299	0.039	8.60415835042208e-43
CKAP4	4.16625388872532e-47	0.373733611264032	0.972	0.943	1.00131745961624e-42
GAPDH	6.45791299568916e-47	-0.265445619189839	0.996	0.999	1.55209480938393e-42
MYCN	1.63089882224728e-46	0.350047191215892	0.435	0.15	3.91970222938911e-42
DDX60L	1.2909803254722e-45	-0.424141372949938	0.754	0.905	3.10274211423988e-41
ODAPH	1.42908987989651e-45	-0.550715518423793	0.209	0.488	3.43467461734327e-41
NEAT1	1.22083054629268e-44	0.382028832192146	0.976	0.979	2.93414413495982e-40
GM2A	9.47210651625123e-44	0.429300997246628	0.822	0.687	2.27652608011582e-39
HSPG2	1.23084729783639e-43	0.364761317764186	0.981	0.972	2.95821839561999e-39
NDRG1	1.52303749401975e-43	-0.474191498418439	0.441	0.706	3.66046831312707e-39
COPZ2	1.64948962192629e-43	0.334626825324577	0.414	0.134	3.96438335733763e-39
TMSB4X	1.74504757723623e-43	-0.765983944409963	0.513	0.741	4.19404734712955e-39
PGRMC1	2.6965997074034e-43	-0.409310833252768	0.833	0.926	6.48100773677333e-39
KCNK12	3.89823681071544e-43	0.39520682857224	0.675	0.403	9.36902235087348e-39
SAMD9	7.57776319653621e-43	-0.307652324672913	0.272	0.58	1.82123960665551e-38
DUSP4	1.06231215110068e-42	0.382052798763162	0.489	0.209	2.55316102395539e-38
S100P	1.39996530967537e-42	-0.288742137127839	0.985	0.999	3.3646766252738e-38
PTN	3.07064374271709e-42	0.377181151687766	0.932	0.887	7.37998517124624e-38
STAT4	6.36867446967383e-42	-0.27961306772473	0.188	0.459	1.53064722204141e-37
TNNT3	1.56929039749157e-41	-0.404576735134523	0.024	0.208	3.77163254133125e-37
BZW2	8.75180555713178e-41	-0.272640516475133	0.984	0.995	2.10340894760105e-36
HES1	1.00586301056613e-40	-0.883519770915763	0.315	0.549	2.41749115959464e-36
TMEM40	1.06538195969862e-40	-0.263049487890704	0.128	0.381	2.56053900193967e-36
JPT1	1.69324747441032e-40	-0.28549873101867	0.997	0.998	4.06955097999776e-36
SFN	3.76855237467903e-40	-0.257888525242071	0.121	0.375	9.05733877730359e-36
ABHD8	1.1740975321468e-39	-0.295272314348105	0.428	0.699	2.82182600876163e-35
CDKN1C	1.25586205588259e-39	0.38193930982402	0.984	0.919	3.01833886510821e-35
CGA	1.47417389657266e-39	0.379400387798185	0.217	0.012	3.54302954302274e-35
YWHAE	1.71891004789722e-39	-0.261529735143364	0.957	0.993	4.13122840911619e-35
TTC3	2.06848803033181e-39	0.295528342297373	0.945	0.919	4.97140413209948e-35
SLC2A1	2.54713479859135e-39	-0.412081223024169	0.735	0.921	6.12178377493444e-35
PHLDA2	2.8464265959032e-39	0.305300386727326	0.986	0.941	6.84110168059376e-35
TNFAIP2	3.02592117764683e-39	0.372046668832897	0.838	0.721	7.2724989583564e-35
PLOD2	3.70270160060244e-39	-0.472707263695766	0.679	0.885	8.89907302688789e-35
CPVL	6.99553281924014e-39	-0.321998752485124	0.547	0.795	1.68130635777618e-34
CD59	1.47421948948179e-38	-0.284723349579793	0.929	0.969	3.54313912102054e-34
CPED1	6.26344676791035e-38	0.351003265205583	0.617	0.376	1.50535679619957e-33
GLO1	7.05542909005295e-38	-0.318589654929434	0.564	0.785	1.69570182750333e-33
LOXL2	8.44933151056793e-38	-0.361349074323216	0.3	0.561	2.0307123352499e-33
IL1R1	1.19522879251828e-37	0.349669317786341	0.931	0.902	2.87261287993842e-33
PLAC8	2.32186820884836e-37	-0.262580986332002	0.966	0.994	5.58037805314615e-33
KRT17	2.78224035568519e-37	-0.41418276910323	0.131	0.37	6.68683647085379e-33
DYNLT1	3.73271679426654e-37	-0.296178997803774	0.83	0.942	8.97121154334019e-33
SARS	6.06123279485682e-37	-0.368273540817679	0.869	0.958	1.45675668991589e-32
FAM43B	8.24717585665425e-37	-0.330844963050843	0.267	0.543	1.98212624538828e-32
UGDH	1.21687188104575e-36	-0.316042600907518	0.803	0.921	2.92462987890534e-32
SHISA5	1.70909813842839e-36	0.384489643659732	0.903	0.857	4.1076464658988e-32
CD99	1.99115984200201e-36	-0.348347116740065	0.636	0.822	4.78555356426763e-32
CLDN4	8.61082277321129e-36	-0.337709903114864	0.793	0.91	2.0695251453136e-31
MAG	1.33052424071575e-35	0.280914196084063	0.405	0.157	3.19778196013624e-31
MMP19	1.59543171105146e-35	-0.272953167543095	0.184	0.432	3.83446057434107e-31
XAGE2	1.71719134230511e-35	-0.309417855843356	0.955	0.996	4.12709767209611e-31
MT-ATP8	1.8543137720896e-35	0.368222118062844	0.831	0.704	4.45665771984014e-31
DNAJB6	2.91404167701997e-35	-0.321636741171721	0.71	0.861	7.0036077665498e-31
CAPN6	3.89600906646009e-35	0.521559060123558	0.406	0.166	9.36366819033019e-31
HES2	1.02794867238706e-34	-0.316937468709388	0.648	0.861	2.47057183921506e-30
TGFB1	1.67845240960931e-34	0.336781472722065	0.661	0.423	4.03399252125502e-30
MCAM	1.74046514594647e-34	-0.301412216036337	0.961	0.978	4.18303393176775e-30
CHIC2	1.98119927784732e-34	-0.282279986826161	0.523	0.752	4.76161434437824e-30
RRAD	3.60315940150967e-34	-0.662375221443007	0.763	0.865	8.65983330558834e-30
PMEPA1	4.62080272881695e-34	0.36998784653659	0.53	0.265	1.11056372784387e-29
BRI3	6.02895558488095e-34	-0.268340291356866	0.995	0.999	1.44899918527029e-29
TSPO	6.92817378048405e-34	0.388054044282594	0.802	0.609	1.66511728640154e-29
DNASE1L3	7.3017708782599e-34	0.441652659101201	0.277	0.065	1.75490761288098e-29
SERPINE1	9.0204276088925e-34	-0.292872637285249	0.995	1	2.16796957152122e-29
VWCE	9.44186170484905e-34	0.311277666161648	0.462	0.226	2.26925704214342e-29
L1TD1	1.35864379012293e-33	-0.290704087390052	0.38	0.638	3.26536448518144e-29
SPINT2	6.33048864907624e-33	-0.335129600587664	0.902	0.953	1.52146964191898e-28
C15orf48	7.03767354618285e-33	-0.467808488309013	0.198	0.441	1.69143446008959e-28
GJA1	1.63781357397534e-32	-0.316815451218075	0.41	0.667	3.93632114369232e-28
FOSB	4.17757741577094e-32	0.332016090743815	0.962	0.935	1.00403895610639e-27
LGALS1	7.45727724450981e-32	-0.62988988484043	0.555	0.731	1.79228201294549e-27
SELENOM	9.72557495070101e-32	0.285922951875882	0.966	0.943	2.33744468365148e-27
AOC1	1.05291326299612e-31	0.491002623331036	0.994	0.902	2.53057173628487e-27
ETHE1	1.29186277981411e-31	-0.281608354728299	0.585	0.763	3.10486300500524e-27
HSPB1	1.4019738928196e-31	0.356698429572736	0.98	0.952	3.36950405400263e-27
COL5A1	1.89524260876797e-31	-0.419897952629179	0.435	0.676	4.55502608591295e-27
TNFSF10	2.47399854832478e-31	-0.400029640772714	0.932	0.985	5.94600811104377e-27
TMOD3	2.86444595797507e-31	-0.280802680089138	0.758	0.893	6.88440941539728e-27
XAGE3	2.88808268856965e-31	-0.422603219481028	0.714	0.833	6.94121793370828e-27
PSG2	4.79855607157424e-31	-0.382953301594396	0.906	0.971	1.15328496624215e-26
LGALS3BP	6.65378092955644e-31	0.251014314523871	0.988	0.99	1.5991697086096e-26
SOD3	7.5295407924843e-31	-0.345982176858133	0.881	0.979	1.80964983406568e-26
ST3GAL5	1.20901793517833e-30	-0.460955522413362	0.652	0.794	2.9057537054076e-26
HERC1	1.29216797890982e-30	0.348960007349185	0.736	0.624	3.10559652051186e-26
CRIP1	1.34541954168464e-30	-0.284968589733893	0.087	0.278	3.23358132648488e-26
FYB1	1.52935995357939e-30	0.308339995961021	0.545	0.321	3.67566371243272e-26
ZFP36L1	2.22761196803116e-30	0.318637556814747	0.973	0.973	5.35384260396608e-26
SOCS3	3.49751986012755e-30	-0.44477227465051	0.607	0.781	8.40593923183056e-26
ATP5F1C	5.17773936443592e-30	-0.251105397913681	0.701	0.864	1.24441787884853e-25
SOD1	5.19931675018037e-30	0.390425212877295	0.962	0.934	1.24960378773835e-25
CAVIN3	6.41553602509074e-30	-0.276228493278193	0.287	0.522	1.54190992827031e-25
RAB3B	4.32048238953248e-29	-0.288786381361337	0.225	0.442	1.03838473750024e-24
AHNAK	9.05886753520046e-29	-0.289288691759366	0.897	0.969	2.17720822341008e-24
DEGS1	1.26606199432191e-28	-0.255718880045949	0.315	0.538	3.04285339715329e-24
TFPI	1.52691359626847e-28	0.326837552062638	0.812	0.682	3.66978413727164e-24
EVA1A	1.67409040028245e-28	0.361931316687191	0.791	0.678	4.02350886803883e-24
CORO6	1.77766377606171e-28	0.291227346482368	0.825	0.773	4.2724371193867e-24
HMGB1	2.59191354525238e-28	-0.296871963233252	0.766	0.891	6.22940501465956e-24
ADM	5.63328870167108e-28	-0.321155019000082	0.949	0.983	1.35390460655963e-23
TRIM64B	1.09005678413643e-27	-0.260651748076754	0.108	0.295	2.6198424749935e-23
EEF2	1.33412284589984e-27	0.257318985862163	0.984	0.993	3.20643084783568e-23
GKN1	1.49866104418495e-27	-0.786502934616021	0.405	0.643	3.6018819535941e-23
ANXA3	8.12223631090841e-27	-0.258013775704779	0.417	0.627	1.95209827496373e-22
DSEL	8.99577469973668e-27	-0.258645808013915	0.547	0.776	2.16204449133471e-22
NNMT	1.14368196511233e-26	-0.266991391798738	0.046	0.197	2.74872523495098e-22
AIF1L	1.27645517481664e-26	0.291074541885571	0.832	0.737	3.06783236715431e-22
RCAN1	2.04284371384523e-26	0.372654261778317	0.361	0.171	4.90977058185562e-22
HIP1	2.83324113562452e-26	0.289361586548883	0.604	0.429	6.80941174535998e-22
ITGA6	3.10449487472607e-26	-0.256568850469974	0.421	0.644	7.46134298191664e-22
FTL	5.93626186464285e-26	-0.390291812382273	0.998	1	1.42672117654826e-21
CREB5	1.5308562835026e-25	0.388842909048999	0.579	0.419	3.67925999177014e-21
CST3	2.23955728633766e-25	0.350286814401874	0.618	0.437	5.38255198198394e-21
MDK	3.85632778600818e-25	0.374446934845698	0.45	0.254	9.26829820089207e-21
CSRP2	4.41251194950431e-25	-0.294814990214356	0.541	0.742	1.06050312194387e-20
ITGA1	5.79504913725741e-25	0.340615420075742	0.827	0.717	1.39278210964845e-20
TUBB4B	6.46836578007458e-25	-0.289300674180377	0.659	0.795	1.55460703158313e-20
LY6K	1.02942366394671e-24	0.31056112472571	0.592	0.418	2.47411683392951e-20
PGF	1.27318006663489e-24	0.437538008946775	0.731	0.565	3.0599609721503e-20
RHOB	1.6465560951221e-24	0.355296992054709	0.817	0.736	3.95733291901646e-20
RHOBTB3	2.2842325079048e-24	0.365217100787006	0.888	0.871	5.4899244094984e-20
CD320	2.50675007098514e-24	0.353706085989842	0.539	0.357	6.02472312060568e-20
NAV2	3.80139573305039e-24	0.293287918735993	0.698	0.579	9.1362745048133e-20
SQSTM1	3.89111326479422e-24	0.258786960216058	0.888	0.851	9.35190162060644e-20
RNASET2	4.20630984070308e-24	0.330799609639292	0.475	0.286	1.01094450711458e-19
CRISPLD2	4.47333471526461e-24	-0.252158998084972	0.728	0.88	1.0751212654667e-19
S100A4	9.15230970310671e-24	-0.320777879552588	0.692	0.85	2.19966611404467e-19
TLE3	9.45536964674703e-24	0.305193677384524	0.647	0.493	2.27250354089918e-19
PAPPA	6.615075684066e-23	0.257914228197784	0.974	0.862	1.58986728990842e-18
SPP1	8.10655505618508e-23	0.648926628245325	0.323	0.145	1.94832944220352e-18
RCN3	8.26602417878819e-23	0.255004023774371	0.499	0.267	1.98665625112995e-18
KRT14	1.46633564758948e-22	-0.372691593690804	0.169	0.349	3.52419109541655e-18
PLCL2	1.65051119285471e-22	0.308155224256818	0.576	0.4	3.966838600907e-18
MBNL3	2.33642003343232e-22	0.25098117009473	0.31	0.131	5.61535190835124e-18
NFE2L1	2.87425842545574e-22	0.32898251263877	0.621	0.458	6.90799269974033e-18
CYGB	3.59688618509841e-22	0.260602258816331	0.283	0.114	8.64475625726551e-18
TNFAIP3	4.54911060103027e-22	0.349126736226144	0.768	0.677	1.09333324185161e-17
PDIA5	7.86361401678212e-22	0.318384772560165	0.892	0.849	1.88994099279341e-17
CARHSP1	9.87074759216519e-22	-0.361399989669385	0.623	0.736	2.37233547630098e-17
FSTL3	2.11274374689546e-21	-0.256461345218794	0.996	0.999	5.07776832128856e-17
POMC	2.2928376649463e-21	0.405113215171614	0.497	0.311	5.51060604393194e-17
CEBPD	3.55511134062071e-21	-0.270541849923454	0.92	0.967	8.54435459604782e-17
S100A6	6.75797129526305e-21	-0.286742666608289	0.951	0.988	1.62421082110352e-16
PTMS	7.88716658555603e-21	-0.259496706767164	0.599	0.759	1.89560161717254e-16
TGFBI	1.84199543900159e-20	-0.618530360146385	0.064	0.199	4.42705183809642e-16
TIMP1	5.65738774203017e-20	-0.28271611238448	0.766	0.885	1.35969656991953e-15
LPL	7.02633607752691e-20	0.314061875402263	0.103	0.002	1.68870961287282e-15
HMGCS1	8.09758146437124e-20	-0.47918476236838	0.335	0.505	1.94617272914698e-15
CD81	9.68162267856147e-20	0.287920363763579	0.757	0.57	2.32688119456546e-15
SLC23A2	4.45072447015936e-19	0.250673813698151	0.532	0.386	1.0696871191581e-14
SLC2A3	1.06605362213033e-18	-0.250514297769992	0.228	0.402	2.56215327542804e-14
PALLD	1.73265154665606e-18	0.262350078170253	0.897	0.849	4.16425472723318e-14
TFDP2	3.41087827104218e-18	-0.253287068835561	0.406	0.584	8.19770483662276e-14
REL	8.21068576007836e-18	0.260421207730012	0.611	0.479	1.97335621557723e-13
LRRC32	9.07842801155371e-18	0.27170491496628	0.329	0.163	2.18190938829682e-13
ID3	1.21339367204332e-17	0.283024251186627	0.907	0.833	2.91627035138891e-13
MLXIP	1.93829232800688e-17	0.26802037036576	0.525	0.389	4.65849178113174e-13
HLA-E	2.15198802169119e-17	0.259408513080411	0.945	0.943	5.1720880113326e-13
HILPDA	2.31503659061728e-17	-0.284541805658921	0.453	0.622	5.56395894188956e-13
ESAM	3.55911965610283e-17	0.341978967258909	0.784	0.687	8.55398818147755e-13
RGCC	1.44084991077532e-16	-0.307468622760354	0.47	0.651	3.46293867555741e-12
CST6	1.82569825986049e-16	-0.401450904264677	0.738	0.844	4.38788319774869e-12
OTUD1	2.75566948119703e-16	-0.318232743763069	0.453	0.609	6.62297603110894e-12
FAM43A	4.87635351383729e-16	0.250679982682805	0.743	0.647	1.17198280351565e-11
ASPSCR1	2.10989721513797e-15	0.466673287795766	0.868	0.854	5.07092696686261e-11
EGFR-AS1	2.40632209304091e-15	0.285359754143029	0.428	0.257	5.78335451841453e-11
RBBP6	4.12208550890803e-15	0.276815916628391	0.559	0.445	9.90702031210955e-11
FGFBP1	5.29012435679781e-15	-0.827661705769264	0.274	0.424	1.27142848791278e-10
GATA2	6.77920306219681e-15	0.288689585247541	0.78	0.694	1.62931366396838e-10
COL4A2	1.04754589804586e-14	0.251330974553011	0.988	0.99	2.51767181136341e-10
EFNB1	4.56779159885478e-14	0.26235957108172	0.704	0.636	1.09782303286876e-09
PEG10	7.60420395256375e-13	0.66191284755004	0.23	0.107	1.82759437795917e-08
PAGE4	7.72104330707443e-13	0.364107483780873	0.22	0.102	1.85567554842227e-08
CYR61	1.60168537655605e-12	-0.303623577606033	0.878	0.916	3.84949063401482e-08
HLA-G	2.11590397365819e-12	-0.453657063289159	0.947	0.918	5.08536361029008e-08
EDNRB	1.70796589417507e-11	0.332889264578149	0.57	0.485	4.10492523006036e-07
AQP1	4.851182261438e-09	0.260308574907936	0.228	0.124	0.000116593314471401
HSPA1A	5.68989889295376e-07	-0.265664806972786	0.319	0.423	0.0136751029993251
