# Supplementary material for: Regionally distinct trophoblast regulate barrier function and invasion in the human placenta
Source: eLife. 2022 Jul 7;11:e78829. doi: 10.7554/eLife.78829 (PMC9323019; doi:10.7554/eLife.78829)
Supplement: Supplementary file 1. [file elife-78829-supp1.xlsx]

## Sheet: trophoblast_int_proportions
Raw Cell Number
Cluster	PV/BP	SC	Total
CTB 1	3564	1133	4697
CTB 2	1066	2594	3660
CTB 3	357	2526	2883
CTB 4	173	2114	2287
STB Precursor	728	460	1188
STB	110	14	124
CTB S-phase	779	1136	1915
CTB G2M-phase	685	636	1321
EVT Precursor	99	8	107
EVT 1	684	1256	1940
EVT 2	2073	1693	3766
EVT 3	2527	1250	3777
EVT 4	1189	814	2003
	14034	15634	29668
Percentage from each region
Cluster	PV/BP	SC
CTB 1	75.8782	24.1218
CTB 2	29.1257	70.8743
CTB 3	12.3829	87.6171
CTB 4	7.56449	92.4355
STB Precursor	61.2795	38.7205
STB	88.7097	11.2903
CTB S-phase	40.6789	59.3211
CTB G2M-phase	51.8547	48.1453
EVT Precursor	92.5234	7.47664
EVT 1	35.2577	64.7423
EVT 2	55.0451	44.9549
EVT 3	66.905	33.095
EVT 4	59.361	40.639
